# Supplementary material for: Expanding the genetic landscape of endometriosis: Integrative -omics analyses implicate key genes and pathways in a multi-ancestry study of over one million women
Source: Research Square preprint supplement (doi:10.21203/rs.3.rs-8116602/v1), 2025-12-04
Supplement: Supplementary file 1 [file 6e0f85d149f8a64f3ad56d4c.xlsx]

## Sheet: supp_table_captions
Table Number	Description
S1	Sample sizes for all GWAS summary statistics included in the meta-analyses.
S2	All variants from the 11 GWAS meta-analyses with p < 5E-8.
S3	GWAS clumps identified by PLINK. The lead SNP p-value was 5E-8, minimum R-squared was 0.1 and maximum distance was 1Mb.
S4	Significant loci for each of the 11 meta-analyses, defined by merging physically overlapping clumps.
S5	Locus labels used for plotting. If loci overlapped from more than one of the 11 meta-analyses, they were merged. Loci were labeled with cytoband unless there was another piece of biological evidence implicating a gene or protein.
S6	LDSC heritability estimates for the single-ancestry meta-analyses
S7	Partitioned LDSC heritability results for the single-ancestry meta-analyses. Functional annotations included uterine-specific epimap states and ENSEMBL regulatory features
S8	Cross-ancestry genetic correlation results estimated by Popcorn. P-values are with respect to testing the hypothesis that the correlation is less than 1
S9	Posterior inclusion probabilities (PIPs) for all variants in the multi-ancestry GWAS loci. Fine-mapping was done using MESuSiE
S10	Gene regions enriched for significance, detected by MAGMA.
S11	All trait-trait genetic correlation estimates (LDSC).
S12	All Mendelian randomization tests for traits nominated by GC.
S13	Regression results of endometriosis status on scDRS and age for 240 cellular contexts.
S14	Gene expression T-test results for 34 prioritized cellular contexts and 35 significant MAGMA genes.
S15	Significant results of the imputed xWAS (PWAS, SWAS, TWAS) analyses across several tissues.
S16	Significant multi-omic associations detected by xSMR across pQTLs, sQTLs, eQTLs, mQTLs, and edQTLs.
S17	Gene-set chi-squared test results.
S18	Biobank methods information on genetic data collection and preparation.
S19	Biobank methods information on ancestry assignment.
S20	Biobank methods information on running the individual GWASs.
S21	Test counts for MAGMA analyses
S22	Test counts for PrediXcan analyses
S23	Test counts for SMR analyses
S24	Test counts for gene set chi-squared tests

## Sheet: S1_study_sample_sizes
Biobank	Phenotype	Ancestry	Cases	Controls	N	Neff	Prev
ALLOFUS_v8	W	AFR	1156	47497	48653	2257.07	0.0237601
ALLOFUS_v8	W	AMR	992	50750	51742	1945.96	0.019172
ALLOFUS_v8	W	CSA+SAS	51	2891	2942	100.232	0.0173351
ALLOFUS_v8	W	EAS	84	6239	6323	165.768	0.0132848
ALLOFUS_v8	W	EUR	3960	135632	139592	7695.32	0.0283684
ALLOFUS_v8	Wex	AFR	484	47497	47981	958.235	0.0100873
ALLOFUS_v8	Wex	AMR	478	50750	51228	947.08	0.00933083
ALLOFUS_v8	Wex	EAS	53	6239	6292	105.107	0.00842339
ALLOFUS_v8	Wex	EUR	2370	135632	138002	4658.6	0.0171737
ALLOFUS_v8	PCN.v1	AFR	468	47497	47965	926.867	0.00975711
ALLOFUS_v8	PCN.v1	AMR	457	50750	51207	905.843	0.00892456
ALLOFUS_v8	PCN.v1	EUR	1233	135632	136865	2443.78	0.00900888
ALLOFUS_v8	PCN.v2	AFR	468	5658	6126	864.494	0.0763957
ALLOFUS_v8	PCN.v2	AMR	457	5875	6332	848.034	0.0721731
ALLOFUS_v8	PCN.v2	EUR	1233	12499	13732	2244.58	0.0897903
ALLOFUS_v8	SCN.v1	AFR	170	47497	47667	338.787	0.00356641
ALLOFUS_v8	SCN.v1	AMR	205	50750	50955	408.351	0.00402316
ALLOFUS_v8	SCN.v1	EUR	664	135632	136296	1321.53	0.00487175
ALLOFUS_v8	SCN.v2	AFR	170	559	729	260.713	0.233196
ALLOFUS_v8	SCN.v2	AMR	205	819	1024	327.92	0.200195
ALLOFUS_v8	SCN.v2	EUR	664	1478	2142	916.332	0.309991
BBJ	W	EAS	1968	78844	80812	3840.15	0.0243528
BBJ	Wex	EAS	1531	78844	80375	3003.67	0.0190482
BBJ	PCN.v1	EAS	155	78844	78999	309.392	0.00196205
BBJ	PCN.v2	EAS	155	1384	1539	278.778	0.100715
BioVU	W	AFR	259	6376	6635	497.78	0.0390354
BioVU	W	EUR	831	27599	28430	1613.42	0.0292297
BioVU	Wex	AFR	90	6376	6466	177.495	0.013919
BioVU	Wex	EUR	367	27599	27966	724.368	0.0131231
BioVU	PCN.v1	AFR	97	6375	6472	191.092	0.0149876
BioVU	PCN.v1	EUR	285	27594	27879	564.173	0.0102227
BioVU	PCN.v2	AFR	97	104	201	100.378	0.482587
BioVU	PCN.v2	EUR	285	406	691	334.906	0.412446
BioVU	SCN.v1	AFR	83	6375	6458	163.867	0.0128523
BioVU	SCN.v1	EUR	267	27594	27861	528.883	0.00958329
BioVU	SCN.v2	AFR	83	104	187	92.3209	0.44385
BioVU	SCN.v2	EUR	267	406	673	322.146	0.396731
CCPM	W	AFR	120	2133	2253	227.217	0.0532623
CCPM	W	AMR	439	7302	7741	828.208	0.056711
CCPM	W	EAS	51	1312	1363	98.1834	0.0374175
CCPM	W	EUR	2253	44138	46391	4287.16	0.0485655
CCPM	Wex	AFR	54	2133	2187	105.333	0.0246914
CCPM	Wex	AMR	227	7302	7529	440.312	0.0301501
CCPM	Wex	EUR	1250	44138	45388	2431.15	0.0275403
CCPM	PCN.v1	AFR	83	2133	2216	159.782	0.0374549
CCPM	PCN.v1	AMR	293	7302	7595	563.393	0.038578
CCPM	PCN.v1	EUR	1276	44138	45414	2480.3	0.0280971
CCPM	PCN.v2	AFR	83	911	994	152.139	0.083501
CCPM	PCN.v2	AMR	293	2847	3140	531.319	0.0933121
CCPM	PCN.v2	EUR	1276	13197	14473	2327.01	0.0881642
CCPM	SCN.v1	AFR	52	2133	2185	101.525	0.0237986
CCPM	SCN.v1	AMR	220	7302	7522	427.131	0.0292475
CCPM	SCN.v1	EUR	983	44138	45121	1923.17	0.0217859
CCPM	SCN.v2	AFR	52	325	377	89.6552	0.137931
CCPM	SCN.v2	AMR	220	1047	1267	363.599	0.173639
CCPM	SCN.v2	EUR	983	6795	7778	1717.53	0.126382
FinnGen	W	EUR	16588	111583	128171	28882.3	0.129421
GHI	W	EUR	401	8686	9087	766.609	0.044129
GHI	Wex	EUR	343	8686	9029	659.94	0.0379887
GHI	PCN.v1	EUR	58	8686	8744	115.231	0.00663312
GHI	PCN.v2	EUR	58	870	928	108.75	0.0625
GHI	SCN.v1	EUR	55	8686	8741	109.308	0.00629219
GHI	SCN.v2	EUR	55	234	289	89.0657	0.190311
HUNT	W	EUR	600	43443	44043	1183.65	0.0136231
HUNT	Wex	EUR	356	43443	43799	706.213	0.00812804
LatvianNationalBiobank	W	EUR	162	2231	2393	302.066	0.0676975
MGBB	W	AFR	111	1089	1200	201.465	0.0925
MGBB	W	AMR	180	1455	1635	320.367	0.110092
MGBB	W	EUR	1228	14881	16109	2268.78	0.0762307
MGBB	Wex	AMR	67	1455	1522	128.101	0.044021
MGBB	Wex	EUR	695	14881	15576	1327.98	0.0446199
MGBB	PCN.v1	EUR	144	14882	15026	285.24	0.00958339
MGBB	PCN.v2	EUR	144	1589	1733	264.069	0.0830929
MGBB	SCN.v1	EUR	99	14881	14980	196.691	0.00660881
MGBB	SCN.v2	EUR	99	1412	1511	185.027	0.0655195
MVP	W	AFR	1426	15595	17021	2613.06	0.0837789
MVP	W	AMR	525	5692	6217	961.332	0.0844459
MVP	W	EUR	2525	31068	33593	4670.42	0.0751645
MVP	Wex	AFR	645	15595	16240	1238.77	0.0397167
MVP	Wex	AMR	248	5692	5940	475.292	0.0417508
MVP	Wex	EUR	1317	31068	32385	2526.88	0.040667
MVP	PCN.v1	EUR	69	31068	31137	137.694	0.00221601
MVP	PCN.v2	EUR	69	12110	12179	137.218	0.00566549
PMBB	W	AFR	678	6922	7600	1235.03	0.0892105
PMBB	W	EUR	1000	18877	19877	1899.38	0.0503094
PMBB	Wex	AFR	132	6922	7054	259.06	0.0187128
PMBB	Wex	EUR	456	18877	19333	890.489	0.0235866
PMBB	PCN.v1	AFR	391	6922	7313	740.189	0.0534664
PMBB	PCN.v1	EUR	323	18877	19200	635.132	0.0168229
PMBB	PCN.v2	AFR	391	2641	3032	681.155	0.128958
PMBB	PCN.v2	EUR	323	2935	3258	581.955	0.0991406
PMBB	SCN.v1	AFR	145	6922	7067	284.05	0.0205179
PMBB	SCN.v1	EUR	156	18877	19033	309.443	0.00819629
PMBB	SCN.v2	AFR	145	194	339	165.959	0.427729
PMBB	SCN.v2	EUR	156	261	417	195.281	0.374101
TWBB1	W	EAS	910	12721	13631	1698.5	0.0667596
TWBB2	W	EAS	4820	61260	66080	8936.84	0.0729419
UKBB	W	AFR	195	5231	5426	375.984	0.0359381
UKBB	W	CSA+SAS	208	5014	5222	399.43	0.0398315
UKBB	W	EUR	4354	217500	221854	8537.1	0.0196255
UKBB	Wex	AFR	74	5224	5298	145.933	0.0139675
UKBB	Wex	CSA+SAS	62	5004	5066	122.482	0.0122385
eMERGE	W	AFR	344	6880	7224	655.238	0.047619
eMERGE	W	EUR	1846	32551	34397	3493.86	0.0536675
eMERGE	Wex	AFR	96	6880	6976	189.358	0.0137615
eMERGE	Wex	EUR	867	32551	33418	1689.01	0.0259441
eMERGE	PCN.v1	AFR	113	6880	6993	222.348	0.016159
eMERGE	PCN.v1	EUR	665	32551	33216	1303.37	0.0200205
eMERGE	PCN.v2	AFR	113	2492	2605	216.197	0.0433781
eMERGE	PCN.v2	EUR	665	8475	9140	1233.23	0.0727571
eMERGE	SCN.v1	AFR	51	6880	6931	101.249	0.00735825
eMERGE	SCN.v1	EUR	349	32551	32900	690.596	0.0106079
eMERGE	SCN.v2	AFR	51	229	280	83.4214	0.182143
eMERGE	SCN.v2	EUR	349	988	1337	515.8	0.261032

## Sheet: S2_GWAS_sig_variants
phenotype	ancestry	chromosome	base_pair_position	effect_allele	other_allele	RSID	nearest_gene	eaf	OR	OR_se	OR_95L	OR_95U	z	p-value	_-log10_p-value	q_statistic	q_p-value	i^2	n_studies	n_samples	effect_directions
W	AFR	2	70875169	C	T	rs11374669	CD207/LINC01143	0.033262	1.46776	0.093676	1.28415	1.67761	5.62811	1.87e-08	7.72873	15.111	0.019411	0.602938	7	47359	+++++++?
W	AFR	20	53466491	C	T	rs115075315	TSHZ2	0.01599	1.58975	0.119	1.35651	1.8631	5.72675	1.05e-08	7.97866	4.56168	0.601126	0	7	94812	++-?++++
W	AFR	20	53468440	G	T	rs114554643	TSHZ2	0.015942	1.58659	0.118755	1.35383	1.85937	5.70262	1.21e-08	7.91714	4.44958	0.616074	0	7	94812	++-?++++
W	AFR	20	53481872	A	G	rs144117136	TSHZ2	0.015902	1.57099	0.118092	1.33953	1.84245	5.55469	2.85e-08	7.54539	6.36008	0.384084	0.0566164	7	94812	+--?++++
W	AFR	20	53490951	T	C	rs115709276	TSHZ2	0.015825	1.5627	0.11776	1.33189	1.83351	5.47487	4.48e-08	7.34863	6.47815	0.371808	0.0738098	7	94812	+--?++++
W	EAS	1	22026643	A	G	rs3768579	LINC00339	0.525734	1.13236	0.019097	1.09492	1.17106	7.24788	4.41e-13	12.3555	2.3394	0.673605	0	5	168209	+++++
W	EAS	1	22028045	A	C	rs80173514	LINC00339	0.525398	1.14075	0.019427	1.10267	1.18014	7.60289	3.03e-14	13.5188	1.72814	0.785601	0	5	168209	+++++
W	EAS	1	22031964	C	T	rs2473290	LINC00339/CDC42	0.443209	0.876901	0.015665	0.846197	0.908718	-7.22387	5.26e-13	12.2787	1.28918	0.863208	0	5	168209	-----
W	EAS	1	22032102	A	G	rs61778045	LINC00339/CDC42	0.522596	1.1421	0.019728	1.10344	1.18213	7.56123	4.17e-14	13.3795	1.85763	0.761924	0	5	168209	+++++
W	EAS	1	22032296	T	G	rs61778046	LINC00339/CDC42	0.522827	1.14119	0.019719	1.10254	1.1812	7.51329	6.02e-14	13.2201	2.10172	0.717056	0	5	168209	+++++
W	EAS	1	22032343	T	C	rs12027753	LINC00339/CDC42	0.522174	1.1423	0.019734	1.10362	1.18234	7.57011	3.9e-14	13.4092	1.94692	0.745521	0	5	168209	+++++
W	EAS	1	22033346	C	T	rs72665313	LINC00339/CDC42	0.524613	1.14087	0.01974	1.10218	1.18092	7.48678	7.37e-14	13.1324	2.26681	0.686817	0	5	168209	+++++
W	EAS	1	22034736	T	C	rs111992780	LINC00339/CDC42	0.521725	1.14326	0.019829	1.10439	1.18349	7.58702	3.42e-14	13.4657	2.08075	0.72091	0	5	168209	+++++
W	EAS	1	22040580	G	T	rs72665317	LINC00339/CDC42	0.534351	1.16942	0.032046	1.10661	1.2358	5.55664	2.82e-08	7.55023	3.2602	0.353221	0.0798108	4	102129	++?++
W	EAS	1	22044572	G	T	rs10917130	LINC00339/CDC42	0.520932	1.15004	0.02055	1.10976	1.19178	7.68569	1.59e-14	13.7979	5.95737	0.202355	0.328563	5	168209	+++++
W	EAS	1	22048315	C	T	rs60087035	LINC00339/CDC42	0.536363	1.21465	0.038781	1.13864	1.29573	5.89784	3.79e-09	8.42193	0.793659	0.672449	0	3	88498	++??+
W	EAS	1	22051787	A	T	rs725158	LINC00339/CDC42	0.512503	1.17026	0.022215	1.12672	1.21548	8.12759	4.6e-16	15.3369	3.14124	0.370357	0.044964	4	154578	+++?+
W	EAS	1	22052387	A	C	rs3754496	LINC00339/CDC42	0.514301	1.17023	0.021868	1.12737	1.21473	8.25745	1.57e-16	15.8051	3.26691	0.352274	0.0817016	4	154578	+++?+
W	EAS	1	22062379	T	C	rs17837951	CDC42	0.513006	1.15537	0.020076	1.11602	1.1961	8.16889	3.27e-16	15.4851	7.25641	0.122943	0.448764	5	168209	+++++
W	EAS	1	22070505	C	T	rs56319427	CDC42	0.518263	1.14631	0.019848	1.10741	1.18658	7.75184	9.48e-15	14.023	7.07087	0.069673	0.575724	4	161886	++++?
W	EAS	1	22076864	A	G	rs12038474	CDC42	0.517677	1.14437	0.019424	1.1063	1.18375	7.81197	5.9e-15	14.2292	8.00383	0.091438	0.500239	5	168209	+++++
W	EAS	1	22088292	T	G	rs2268179	CDC42	0.52413	1.14402	0.019097	1.10659	1.18272	7.92791	2.34e-15	14.6312	7.95926	0.093082	0.497441	5	168209	+++++
W	EAS	1	22088917	T	A	rs2268177	CDC42	0.526935	1.14443	0.019142	1.10691	1.18322	7.93266	2.25e-15	14.6478	8.14162	0.086526	0.508697	5	168209	+++++
W	EAS	1	22096228	A	G	rs10917151	CDC42	0.525801	1.1494	0.01934	1.11149	1.1886	8.13766	4.24e-16	15.373	7.56326	0.108952	0.471128	5	168209	+++++
W	EAS	1	22099694	A	C	rs1534949	CDC42	0.332466	0.898844	0.016468	0.866568	0.932323	-5.71587	1.12e-08	7.9509	1.72052	0.786986	0	5	168209	-----
W	EAS	1	22109953	C	G	rs7412010	CDC42/WNT4	0.537139	1.14742	0.019489	1.10922	1.18693	7.96061	1.8e-15	14.7456	9.27805	0.054513	0.568875	5	168209	+++++
W	EAS	1	22123994	T	C	rs2235529	WNT4	0.52068	1.1442	0.019045	1.10688	1.18279	7.96057	1.8e-15	14.7454	7.69344	0.103476	0.480077	5	168209	-++++
W	EAS	1	22132301	G	A	rs12404660	WNT4	0.714622	1.12887	0.02156	1.08661	1.17277	6.22696	4.9e-10	9.30947	5.25086	0.262513	0.238219	5	168209	+++++
W	EAS	1	22135618	A	G	rs12037376	WNT4	0.530422	1.15976	0.019387	1.12177	1.19905	8.72063	2.92e-18	17.5339	8.64298	0.07067	0.537196	5	168209	+++++
W	EAS	1	22135638	G	T	rs10799737	WNT4	0.462734	0.863492	0.014507	0.835057	0.892895	-8.59127	9.08e-18	17.0418	9.0501	0.059859	0.558016	5	168209	-----
W	EAS	1	22139327	C	T	rs61768001	WNT4	0.526898	1.16058	0.019373	1.12261	1.19983	8.7743	1.82e-18	17.7401	8.75852	0.067427	0.543302	5	168209	+++++
W	EAS	1	22141722	T	C	rs3820282	WNT4	0.524609	1.15889	0.019312	1.12104	1.19802	8.70348	3.4e-18	17.4682	8.45331	0.076315	0.526813	5	168209	+++++
W	EAS	1	22143914	T	C	rs56318008	LOC105376845	0.526719	1.15717	0.019305	1.11933	1.19628	8.60614	7.98e-18	17.098	8.22578	0.083649	0.513724	5	168209	-++++
W	EAS	1	22143958	C	G	rs55938609	LOC105376845	0.526592	1.15806	0.01933	1.12018	1.19723	8.64735	5.57e-18	17.2542	8.27903	0.081875	0.516852	5	168209	-++++
W	EAS	2	11581409	G	T	rs11674184	GREB1	0.449954	0.897283	0.015472	0.866957	0.92867	-6.17861	6.67e-10	9.17618	7.53791	0.110049	0.469349	5	168209	-----
W	EAS	2	11581886	G	C	rs10929759	GREB1	0.481821	0.893477	0.015529	0.86304	0.924988	-6.36947	1.96e-10	9.70803	5.52523	0.23752	0.276048	5	168209	-----
W	EAS	2	11581956	T	C	rs10200851	GREB1	0.485949	0.896138	0.015742	0.865283	0.928092	-6.1345	8.8e-10	9.0555	6.85553	0.143723	0.416529	5	168209	-----
W	EAS	2	11581976	T	A	rs10165819	GREB1	0.490959	0.895474	0.015514	0.865066	0.92695	-6.26366	3.88e-10	9.41129	7.173	0.127024	0.442353	5	168209	-----
W	EAS	2	11582449	G	A	rs11674605	GREB1	0.490788	0.894119	0.015512	0.863716	0.925592	-6.34074	2.36e-10	9.62699	6.24723	0.18143	0.359716	5	168209	-----
W	EAS	2	11582895	T	C	rs7576826	GREB1	0.492623	0.896735	0.015501	0.866352	0.928183	-6.19781	5.9e-10	9.22901	6.39511	0.171521	0.374522	5	168209	-----
W	EAS	2	11582984	A	G	rs16857668	GREB1	0.44324	0.896108	0.015921	0.864902	0.92844	-6.06576	1.35e-09	8.86903	5.88935	0.207565	0.320808	5	168209	-----
W	EAS	2	11583732	A	G	rs1865573	GREB1	0.451098	0.899285	0.015519	0.868868	0.930767	-6.04684	1.52e-09	8.81804	6.63357	0.156567	0.397006	5	168209	-----
W	EAS	2	11584349	G	A	rs9287734	GREB1	0.492509	0.89459	0.015428	0.864352	0.925886	-6.34924	2.23e-10	9.65093	5.81089	0.213723	0.311638	5	168209	-----
W	EAS	2	11584454	T	G	rs9789525	GREB1	0.409299	0.898713	0.016478	0.866416	0.932213	-5.71922	1.1e-08	7.95943	5.33018	0.255065	0.249557	5	168209	-----
W	EAS	2	11584558	G	A	rs9789414	GREB1	0.493793	0.895757	0.015473	0.865429	0.927147	-6.26442	3.86e-10	9.41338	5.77402	0.216672	0.307242	5	168209	-----
W	EAS	2	11584923	C	T	rs12468019	GREB1	0.516104	0.89715	0.015483	0.866803	0.92856	-6.18174	6.53e-10	9.18479	4.38253	0.356705	0.0872846	5	168209	-----
W	EAS	2	11587381	A	G	rs13394619	GREB1	0.539981	0.90016	0.015078	0.870608	0.930716	-6.17584	6.78e-10	9.16858	4.67792	0.321969	0.144919	5	168209	+----
W	EAS	2	11587862	C	G	rs4669752	GREB1	0.5316	0.898176	0.015317	0.868154	0.929236	-6.19126	6.15e-10	9.21096	4.65345	0.324738	0.140423	5	168209	+----
W	EAS	2	11587963	T	C	rs4669754	GREB1	0.479119	0.901316	0.015854	0.870241	0.9335	-5.80421	6.64e-09	8.17781	3.82754	0.429848	0	5	168209	+----
W	EAS	2	11591648	G	T	rs2358040	GREB1	0.519673	0.892113	0.015682	0.861375	0.923948	-6.38171	1.81e-10	9.74267	3.33108	0.504023	0	5	168209	+----
W	EAS	2	11591720	C	T	rs2884374	GREB1	0.519877	0.891707	0.015661	0.861012	0.923496	-6.41325	1.47e-10	9.83221	3.26396	0.514662	0	5	168209	+----
W	EAS	2	49032563	T	G	rs55861243	FSHR	0.236558	1.12116	0.021625	1.07878	1.16521	5.8165	6.17e-09	8.20964	5.8216	0.212873	0.312904	5	168209	++++-
W	EAS	2	49035532	C	A	rs62162078	FSHR	0.239178	1.11744	0.021498	1.0753	1.16122	5.66219	1.53e-08	7.81463	6.36237	0.173671	0.371304	5	168209	++++-
W	EAS	2	49052533	C	T	rs62162081	FSHR	0.200011	1.12182	0.022754	1.07722	1.16826	5.55399	2.86e-08	7.54365	5.09878	0.277311	0.215499	5	168209	++++-
W	EAS	2	49063381	T	G	rs73931507	FSHR	0.200414	1.12307	0.022759	1.07846	1.16952	5.6127	2.04e-08	7.69006	5.82425	0.212664	0.313216	5	168209	+++++
W	EAS	2	49064852	A	G	rs11686941	FSHR	0.201651	1.12101	0.022687	1.07654	1.16731	5.53138	3.25e-08	7.48763	4.88602	0.299194	0.181338	5	168209	++++-
W	EAS	2	49089753	G	C	rs12614425	FSHR	0.239375	1.12388	0.021671	1.08141	1.16803	5.94176	2.9e-09	8.53771	2.82538	0.587459	0	5	168209	+++++
W	EAS	2	49092263	C	T	rs11689334	FSHR	0.246368	1.12553	0.021448	1.08349	1.1692	6.08914	1.17e-09	8.93221	2.84027	0.584901	0	5	168209	+++++
W	EAS	2	49093617	T	C	rs62162104	FSHR	0.248689	1.11962	0.021357	1.07776	1.16311	5.81199	6.34e-09	8.19795	3.90475	0.419051	0	5	168209	++++-
W	EAS	2	49094988	C	G	rs2882224	FSHR	0.241157	1.11884	0.021533	1.07664	1.1627	5.72397	1.07e-08	7.97156	2.54406	0.636764	0	5	168209	+++++
W	EAS	2	49095826	A	G	rs11688474	FSHR	0.24127	1.11814	0.021517	1.07597	1.16197	5.69282	1.28e-08	7.89224	2.38124	0.66602	0	5	168209	+++++
W	EAS	2	49096966	G	C	rs62162106	FSHR	0.246832	1.11911	0.021334	1.07729	1.16255	5.79213	7.14e-09	8.14659	2.64899	0.618169	0	5	168209	+++++
W	EAS	2	49098215	G	C	rs2134812	FSHR	0.247799	1.11825	0.021263	1.07658	1.16154	5.76772	8.25e-09	8.08369	2.77869	0.595516	0	5	168209	+++++
W	EAS	2	49099027	A	G	rs62162135	FSHR	0.248123	1.12	0.021288	1.07828	1.16334	5.85084	5.02e-09	8.29893	2.88667	0.576967	0	5	168209	+++++
W	EAS	2	49100321	C	A	rs60745617	FSHR	0.247603	1.11969	0.021339	1.07786	1.16313	5.82049	6.03e-09	8.22	2.80066	0.591719	0	5	168209	+++++
W	EAS	2	49108851	A	G	rs11125214	FSHR	0.243479	1.1205	0.021492	1.07837	1.16427	5.81922	6.07e-09	8.21669	2.53239	0.638845	0	5	168209	+++++
W	EAS	2	49112994	G	C	rs1126076	FSHR	0.245711	1.11911	0.021385	1.07719	1.16265	5.77802	7.76e-09	8.1102	2.32867	0.675553	0	5	168209	+++++
W	EAS	2	49113774	G	T	rs28513867	FSHR	0.244355	1.1189	0.021447	1.07686	1.16258	5.7503	9.14e-09	8.03895	2.30892	0.679146	0	5	168209	+++++
W	EAS	2	49113917	C	G	rs6760923	FSHR	0.244454	1.11893	0.021443	1.0769	1.1626	5.75291	9e-09	8.04565	2.30708	0.67948	0	5	168209	+++++
W	EAS	2	49116033	T	C	rs4971642	FSHR	0.23935	1.11739	0.021579	1.07509	1.16135	5.63786	1.77e-08	7.75325	1.97286	0.740751	0	5	168209	+++++
W	EAS	2	49116624	T	G	rs4971643	FSHR	0.243473	1.11689	0.021455	1.07484	1.16059	5.64586	1.68e-08	7.77341	1.70175	0.790399	0	5	168209	+++++
W	EAS	2	49117048	T	A	rs62162138	FSHR	0.241165	1.11592	0.021519	1.07374	1.15975	5.57961	2.47e-08	7.60737	1.85732	0.76198	0	5	168209	+++++
W	EAS	2	49117390	G	A	rs57051560	FSHR	0.241034	1.1158	0.021516	1.07363	1.15963	5.57447	2.54e-08	7.59454	1.77755	0.776587	0	5	168209	+++++
W	EAS	2	49118324	A	G	rs62162140	FSHR	0.245729	1.11824	0.021402	1.0763	1.16183	5.72928	1.03e-08	7.98514	2.28127	0.684182	0	5	168209	+++++
W	EAS	2	49125607	A	G	rs11688329	FSHR	0.241549	1.11787	0.021543	1.07564	1.16175	5.67172	1.45e-08	7.83873	1.53557	0.820322	0	5	168209	+++++
W	EAS	2	49129078	C	T	rs17038310	FSHR	0.242725	1.1177	0.021499	1.07557	1.16149	5.6754	1.42e-08	7.84804	1.69242	0.792095	0	5	168209	+++++
W	EAS	2	49130276	A	G	rs17038315	FSHR	0.241332	1.11822	0.021559	1.07596	1.16213	5.68537	1.34e-08	7.87332	1.71745	0.787546	0	5	168209	+++++
W	EAS	2	49131270	C	A	rs62162141	FSHR	0.243376	1.11711	0.021464	1.07504	1.16082	5.65449	1.6e-08	7.79518	1.70494	0.78982	0	5	168209	+++++
W	EAS	2	49131891	G	A	rs11678373	FSHR	0.241454	1.11796	0.021554	1.07571	1.16186	5.67327	1.44e-08	7.84264	1.61952	0.80528	0	5	168209	+++++
W	EAS	2	49132594	G	A	rs12614875	FSHR	0.241409	1.11834	0.02156	1.07608	1.16226	5.69115	1.29e-08	7.88799	1.69812	0.791059	0	5	168209	+++++
W	EAS	2	49133673	G	A	rs75673607	FSHR	0.242364	1.11884	0.021532	1.07664	1.1627	5.7243	1.07e-08	7.97241	1.93772	0.747213	0	5	168209	+++++
W	EAS	2	49134665	G	C	rs62162144	FSHR	0.240869	1.11703	0.021563	1.07477	1.16096	5.62421	1.91e-08	7.71894	1.81537	0.769669	0	5	168209	+++++
W	EAS	2	49138908	T	C	rs17038320	FSHR	0.240964	1.11791	0.02162	1.07553	1.16195	5.6532	1.61e-08	7.79191	1.83658	0.765783	0	5	168209	+++++
W	EAS	2	49142205	C	G	rs62162146	FSHR	0.241383	1.11793	0.02166	1.07548	1.16206	5.64394	1.7e-08	7.76857	1.70864	0.789147	0	5	168209	+++++
W	EAS	2	49144468	G	T	rs9789577	FSHR	0.241663	1.11771	0.02142	1.07573	1.16133	5.697	1.25e-08	7.90287	1.80549	0.771477	0	5	168209	+++++
W	EAS	2	49144484	C	A	rs9789669	FSHR	0.241709	1.11746	0.021411	1.0755	1.16107	5.68686	1.33e-08	7.87711	1.68405	0.793614	0	5	168209	+++++
W	EAS	2	49144627	C	T	rs9789581	FSHR	0.241491	1.11644	0.021408	1.07448	1.16004	5.63561	1.79e-08	7.7476	1.62174	0.804879	0	5	168209	+++++
W	EAS	2	49145174	C	T	rs17038347	FSHR	0.241308	1.1132	0.021375	1.07131	1.15673	5.47934	4.37e-08	7.35957	1.34225	0.854168	0	5	168209	+++++
W	EAS	2	49145761	C	T	rs11686783	FSHR	0.241155	1.11394	0.021392	1.07201	1.1575	5.51229	3.63e-08	7.44052	1.3006	0.861273	0	5	168209	+++++
W	EAS	2	49146912	C	G	rs1504183	FSHR	0.24128	1.11664	0.021419	1.07466	1.16027	5.64288	1.71e-08	7.76588	1.34953	0.852918	0	5	168209	+++++
W	EAS	6	151473569	C	T	rs6937816	ARMT1/LOC124901434	0.353508	1.10909	0.019294	1.07128	1.14825	5.85008	5.05e-09	8.29694	3.49797	0.478187	0	5	168209	+++++
W	EAS	6	151494876	C	T	rs1971256	CCDC170	0.371418	1.10381	0.018496	1.06756	1.1413	5.79726	6.92e-09	8.15985	4.55977	0.335519	0.122763	5	168209	+++++
W	EAS	6	151505114	C	T	rs7740302	CCDC170	0.371246	1.10655	0.018783	1.06973	1.14463	5.86482	4.62e-09	8.33541	4.31236	0.36538	0.0724328	5	168209	+++++
W	EAS	6	151509634	C	T	rs4870024	CCDC170	0.383157	1.10475	0.01944	1.06665	1.14422	5.56341	2.71e-08	7.56704	3.49544	0.478572	0	5	168209	+++++
W	EAS	7	46630950	G	A	rs993184	HMGN1P19	0.483963	0.855909	0.023492	0.809865	0.904572	-5.51486	3.57e-08	7.44687	4.78961	0.187867	0.373644	4	102129	+-?--
W	EAS	7	46631525	T	G	rs6969406	HMGN1P19	0.488808	0.854069	0.023392	0.80822	0.902518	-5.60334	2.15e-08	7.66662	4.41171	0.220302	0.319991	4	102129	+-?--
W	EAS	7	46632024	T	G	rs10951860	HMGN1P19	0.481444	0.848497	0.023009	0.803399	0.896125	-5.89602	3.83e-09	8.41713	5.84366	0.119469	0.486624	4	102129	+-?--
W	EAS	7	46634176	T	C	rs55909142	HMGN1P19	0.483989	0.850814	0.022952	0.805829	0.89831	-5.82934	5.72e-09	8.24296	5.30812	0.150577	0.434828	4	102129	+-?--
W	EAS	7	46635603	T	G	rs60613010	HMGN1P19	0.528402	0.858236	0.023225	0.812715	0.906307	-5.49799	3.93e-08	7.40533	3.53974	0.315645	0.15248	4	102129	+-?--
W	EAS	7	46635608	A	G	rs59733115	HMGN1P19	0.486553	0.852302	0.023105	0.807016	0.900128	-5.73727	9.87e-09	8.00557	4.60783	0.202871	0.348935	4	102129	+-?--
W	EAS	7	46643352	A	G	rs7799895	HMGN1P19/LOC730338	0.466593	0.900879	0.016007	0.869504	0.933385	-5.77174	8.05e-09	8.09403	3.14097	0.534518	0	5	168209	+----
W	EAS	7	46652298	A	G	rs12112345	HMGN1P19/LOC730338	0.424043	0.907177	0.015851	0.87611	0.939346	-5.47943	4.37e-08	7.35979	0.821674	0.935519	0	5	168209	+---+
W	EAS	7	46653069	T	G	rs13237848	HMGN1P19/LOC730338	0.42902	0.905883	0.015747	0.87502	0.937835	-5.58901	2.34e-08	7.6308	0.64976	0.957377	0	5	168209	+----
W	EAS	7	46653573	G	A	rs4720548	HMGN1P19/LOC730338	0.425846	0.906476	0.015815	0.875477	0.938571	-5.53115	3.26e-08	7.48708	0.819622	0.935798	0	5	168209	+----
W	EAS	7	46653900	G	T	rs1030641	HMGN1P19/LOC730338	0.424636	0.906098	0.015823	0.875084	0.938211	-5.5494	2.94e-08	7.53225	0.6654	0.955526	0	5	168209	+----
W	EAS	7	46654131	A	C	rs12534459	HMGN1P19/LOC730338	0.423871	0.905446	0.015868	0.874345	0.937653	-5.56998	2.61e-08	7.58338	0.681944	0.953537	0	5	168209	+----
W	EAS	7	46654922	T	C	rs4724484	HMGN1P19/LOC730338	0.424541	0.906654	0.015868	0.875553	0.938859	-5.50264	3.83e-08	7.41676	0.659574	0.956219	0	5	168209	+----
W	EAS	7	46659568	C	T	rs4724486	HMGN1P19/LOC730338	0.424415	0.906095	0.015996	0.874742	0.938571	-5.48855	4.15e-08	7.38213	0.683137	0.953392	0	5	168209	-----
W	EAS	9	22086768	A	T	rs75221032	CDKN2B-AS1	0.167061	0.881075	0.019946	0.841981	0.921985	-5.46781	4.66e-08	7.33135	3.87914	0.422609	0	5	168209	-----
W	EAS	9	22087605	C	A	rs80076828	CDKN2B-AS1	0.177621	0.874219	0.019294	0.836402	0.913746	-5.958	2.63e-09	8.58072	4.14421	0.38684	0.0347989	5	168209	-----
W	EAS	9	22087689	G	A	rs78651848	CDKN2B-AS1	0.177772	0.875844	0.019317	0.837983	0.915415	-5.87993	4.22e-09	8.37494	4.02984	0.401983	0.00740427	5	168209	-----
W	EAS	9	22089265	A	G	rs80307048	CDKN2B-AS1	0.177189	0.877988	0.019368	0.840026	0.917665	-5.77021	8.13e-09	8.09008	4.20432	0.37906	0.0485965	5	168209	-----
W	EAS	9	22090399	C	A	rs151145305	CDKN2B-AS1	0.177395	0.877084	0.019349	0.839159	0.916722	-5.81555	6.21e-09	8.20718	4.25833	0.372172	0.060664	5	168209	-----
W	EAS	9	22091019	A	G	rs143632035	CDKN2B-AS1	0.177315	0.87721	0.019353	0.839278	0.916858	-5.80874	6.46e-09	8.18952	4.24446	0.373932	0.0575944	5	168209	-----
W	EAS	9	22091685	G	C	rs150901650	CDKN2B-AS1	0.177315	0.87721	0.019353	0.839278	0.916858	-5.80874	6.46e-09	8.18952	4.24446	0.373932	0.0575944	5	168209	-----
W	EAS	9	22092098	A	G	rs7869527	CDKN2B-AS1	0.187873	0.878455	0.018797	0.841613	0.91691	-5.92833	3.15e-09	8.50223	4.26109	0.371823	0.0612731	5	168209	-----
W	EAS	9	22099224	T	C	rs79331368	CDKN2B-AS1	0.190866	0.880382	0.018725	0.843681	0.918679	-5.86421	4.64e-09	8.33382	4.5418	0.33762	0.119292	5	168209	-----
W	EAS	12	95233461	G	A	rs6538622	VEZT	0.429446	1.10041	0.018649	1.06385	1.13821	5.55128	2.9e-08	7.5369	0.994774	0.910587	0	5	168209	+++++
W	EUR	1	22020903	G	A	rs12407439	CELA3A/LINC01635	0.162415	1.11406	0.012732	1.08911	1.13959	9.34473	9.8e-21	20.0089	11.9294	0.154381	0.329389	9	636410	++?+?++-+?++
W	EUR	1	22021916	A	G	rs10917119	CELA3A/LINC01635	0.158117	1.11547	0.012373	1.09122	1.14026	9.74375	2.09e-22	21.679	12.4239	0.257687	0.1951	11	714850	++?++++-++++
W	EUR	1	22022893	T	C	rs79050195	CELA3A/LINC01635	0.159725	1.11892	0.012303	1.09481	1.14356	10.1087	5.41e-24	23.2665	15.1873	0.125383	0.341553	11	714850	++?++++-++++
W	EUR	1	22026643	A	G	rs3768579	LINC00339	0.162816	1.11706	0.012303	1.09294	1.1417	9.94188	2.93e-23	22.5337	12.7085	0.240431	0.213123	11	704060	+++++++-+++?
W	EUR	1	22027552	T	C	rs41307810	LINC00339	0.055368	1.12177	0.019678	1.0832	1.16172	6.43735	1.26e-10	9.90089	14.1363	0.078281	0.434081	9	666543	++??-+--+++?
W	EUR	1	22028045	A	C	rs80173514	LINC00339	0.162302	1.11905	0.012198	1.09514	1.14348	10.2078	1.96e-24	23.7073	13.4041	0.201946	0.253961	11	714850	++?++++-++++
W	EUR	1	22029485	A	G	rs10917123	LINC00339	0.210508	1.08335	0.011017	1.06175	1.10538	7.79356	6.83e-15	14.1659	18.6524	0.044907	0.463875	11	704060	+++++++-+++?
W	EUR	1	22030736	T	A	rs3820687	LINC00339	0.215029	1.08474	0.01074	1.06369	1.10621	8.13531	4.32e-16	15.3646	23.8747	0.013272	0.539261	12	723937	+++-+++-++++
W	EUR	1	22031964	C	T	rs2473290	LINC00339/CDC42	0.747506	0.924709	0.008723	0.907612	0.942127	-8.22134	2.12e-16	15.6742	5.9609	0.818538	0	11	704060	-------+---?
W	EUR	1	22032102	A	G	rs61778045	LINC00339/CDC42	0.162901	1.11842	0.0121	1.0947	1.14265	10.2341	1.5e-24	23.825	14.7381	0.194801	0.253638	12	723937	+++++++-++++
W	EUR	1	22032296	T	G	rs61778046	LINC00339/CDC42	0.163316	1.11892	0.012094	1.09522	1.14314	10.2853	8.81e-25	24.055	15.3339	0.167716	0.282634	12	723937	+++++++-++++
W	EUR	1	22032343	T	C	rs12027753	LINC00339/CDC42	0.163179	1.11722	0.012277	1.09316	1.14182	9.97785	2.04e-23	22.6907	13.101	0.21808	0.236699	11	704060	+++++++-+++?
W	EUR	1	22032589	C	G	rs7541107	LINC00339/CDC42	0.586278	0.954826	0.007975	0.939195	0.970717	-5.48915	4.13e-08	7.38361	5.07393	0.927534	0	12	723937	-------+----
W	EUR	1	22032899	G	A	rs2009020	LINC00339/CDC42	0.586456	0.954934	0.007977	0.939299	0.970829	-5.47484	4.48e-08	7.34854	5.66428	0.8948	0	12	723937	-------+----
W	EUR	1	22033205	C	T	rs2473287	LINC00339/CDC42	0.586191	0.955006	0.007974	0.939376	0.970896	-5.46824	4.65e-08	7.3324	5.38852	0.910902	0	12	723937	-------+----
W	EUR	1	22034736	T	C	rs111992780	LINC00339/CDC42	0.161285	1.11781	0.012183	1.09393	1.14221	10.1091	5.39e-24	23.2683	15.9745	0.14208	0.311403	12	723937	+++++++-++++
W	EUR	1	22035704	G	A	rs2501284	LINC00339/CDC42	0.586326	0.955121	0.007973	0.939494	0.971007	-5.45558	4.99e-08	7.30148	5.62173	0.897375	0	12	723937	-------+----
W	EUR	1	22037153	C	A	rs3123459	LINC00339/CDC42	0.586342	0.955048	0.007973	0.939422	0.970935	-5.46431	4.76e-08	7.32279	5.64928	0.895711	0	12	723937	-------+----
W	EUR	1	22038465	C	A	rs2501281	LINC00339/CDC42	0.687358	0.939532	0.008287	0.92329	0.956059	-7.01066	2.47e-12	11.6081	12.6377	0.317662	0.129589	12	723937	-+-----+----
W	EUR	1	22039196	T	C	rs12405695	LINC00339/CDC42	0.161234	1.11781	0.012185	1.09393	1.14221	10.1076	5.48e-24	23.2615	15.9616	0.142562	0.310846	12	723937	+++++++-++++
W	EUR	1	22039609	C	T	rs10917128	LINC00339/CDC42	0.162196	1.11882	0.01217	1.09497	1.1432	10.2114	1.89e-24	23.7234	16.0775	0.138278	0.315814	12	723937	+++++++-++++
W	EUR	1	22040580	G	T	rs72665317	LINC00339/CDC42	0.164094	1.11726	0.012107	1.09353	1.1415	10.1229	4.68e-24	23.3296	17.0139	0.107465	0.35347	12	723937	+++++++-++++
W	EUR	1	22041849	T	C	rs2501279	LINC00339/CDC42	0.589619	0.954311	0.008112	0.938411	0.970479	-5.45571	4.99e-08	7.30178	5.16486	0.879896	0	11	695507	---?---+----
W	EUR	1	22042624	T	C	rs2473332	LINC00339/CDC42	0.584036	0.954032	0.007959	0.938433	0.96989	-5.59478	2.26e-08	7.64522	5.57674	0.900062	0	12	723937	-------+----
W	EUR	1	22043928	G	A	rs2473330	LINC00339/CDC42	0.583126	0.953988	0.007959	0.938389	0.969846	-5.59993	2.2e-08	7.65808	5.02751	0.929827	0	12	723937	-------+----
W	EUR	1	22044572	G	T	rs10917130	LINC00339/CDC42	0.163286	1.11907	0.012157	1.09524	1.14342	10.2454	1.33e-24	23.8757	15.3088	0.168793	0.281458	12	723937	+++++++-++++
W	EUR	1	22051787	A	T	rs725158	LINC00339/CDC42	0.169741	1.11762	0.011958	1.09419	1.14156	10.2844	8.89e-25	24.0513	11.2067	0.426109	0.018448	12	723937	+++++++-++++
W	EUR	1	22052387	A	C	rs3754496	LINC00339/CDC42	0.169699	1.11747	0.011958	1.09404	1.14141	10.2703	1.03e-24	23.9877	11.335	0.41564	0.0295546	12	723937	+++++++-++++
W	EUR	1	22062379	T	C	rs17837951	CDC42	0.169737	1.11884	0.011977	1.09537	1.14282	10.3793	3.31e-25	24.4807	11.3521	0.414252	0.0310188	12	723937	+++++++-++++
W	EUR	1	22070706	T	C	rs2501256	CDC42	0.667114	0.942209	0.00818	0.926178	0.958519	-6.79857	1.1e-11	10.9602	8.40444	0.676682	0	12	723937	-------+----
W	EUR	1	22076864	A	G	rs12038474	CDC42	0.169921	1.11983	0.01197	1.09637	1.14379	10.4767	1.19e-25	24.9251	11.6227	0.39266	0.0535772	12	723937	+++++++-++++
W	EUR	1	22088292	T	G	rs2268179	CDC42	0.17012	1.11683	0.011924	1.09346	1.1407	10.2407	1.4e-24	23.8546	13.0442	0.290445	0.156715	12	723937	+++-+++-++++
W	EUR	1	22088917	T	A	rs2268177	CDC42	0.170174	1.1167	0.011922	1.09333	1.14056	10.2303	1.56e-24	23.8079	12.7322	0.311191	0.136047	12	723937	+++++++-++++
W	EUR	1	22096228	A	G	rs10917151	CDC42	0.157362	1.12508	0.012597	1.1004	1.15033	10.4104	2.39e-25	24.6222	14.0775	0.169484	0.289649	11	704060	+++-+++-+++?
W	EUR	1	22099694	A	C	rs1534949	CDC42	0.561332	0.952738	0.008057	0.936947	0.968796	-5.67763	1.4e-08	7.85369	6.95726	0.802534	0	12	723937	------++----
W	EUR	1	22109953	C	G	rs7412010	CDC42/WNT4	0.157123	1.12624	0.012405	1.10193	1.15109	10.6763	1.42e-26	25.8492	14.6713	0.198043	0.250239	12	723937	+++-+++-++++
W	EUR	1	22113027	C	T	rs4654783	CDC42/WNT4	0.687669	0.939053	0.008249	0.922884	0.955505	-7.09654	1.33e-12	11.8759	11.0642	0.437898	0.00580492	12	723937	-------+----
W	EUR	1	22115372	T	C	rs1474647	CDC42/WNT4	0.550671	0.951947	0.007879	0.936504	0.967645	-5.90127	3.71e-09	8.43092	7.94045	0.718629	0	12	723937	-------+----
W	EUR	1	22118482	T	C	rs10737462	WNT4	0.208851	1.09244	0.010975	1.07092	1.11438	8.71318	3.12e-18	17.5054	21.9704	0.024603	0.499327	12	723937	++--+++-++++
W	EUR	1	22120823	G	A	rs3765350	WNT4	0.209306	1.08949	0.01113	1.06767	1.11175	8.30565	1.05e-16	15.9807	18.1482	0.052515	0.44898	11	704060	++--+++-+++?
W	EUR	1	22123994	T	C	rs2235529	WNT4	0.154632	1.12651	0.012942	1.10114	1.15246	10.2513	1.25e-24	23.9024	12.9326	0.165679	0.304086	10	675630	++-?+++-+++?
W	EUR	1	22132301	G	A	rs12404660	WNT4	0.178163	1.10231	0.011899	1.07899	1.12613	8.92774	4.61e-19	18.3366	16.0369	0.098581	0.376438	11	704060	++--+++-+++?
W	EUR	1	22135618	A	G	rs12037376	WNT4	0.152325	1.1245	0.012792	1.09943	1.15015	10.1999	2.13e-24	23.672	12.5171	0.251938	0.201092	11	704060	++-++++-+++?
W	EUR	1	22135638	G	T	rs10799737	WNT4	0.653264	0.932958	0.008201	0.916885	0.949313	-7.82666	5.25e-15	14.2798	8.78313	0.552802	0	11	704060	-------+---?
W	EUR	1	22139327	C	T	rs61768001	WNT4	0.150884	1.12702	0.012674	1.10218	1.15242	10.5161	7.83e-26	25.1063	13.9524	0.235638	0.211606	12	723937	++-++++-++++
W	EUR	1	22141722	T	C	rs3820282	WNT4	0.15111	1.12243	0.012837	1.09727	1.14817	9.98525	1.89e-23	22.723	13.8545	0.17973	0.278215	11	704060	++-++++-+++?
W	EUR	1	22143914	T	C	rs56318008	LOC105376845	0.145899	1.1248	0.012929	1.09946	1.15072	10.116	5.03e-24	23.2986	10.6157	0.388235	0.0579953	11	704060	++-++++-+++?
W	EUR	1	22143958	C	G	rs55938609	LOC105376845	0.145358	1.12691	0.01276	1.10191	1.15249	10.4353	1.84e-25	24.7356	11.3731	0.412558	0.032803	12	723937	++-++++-++++
W	EUR	1	22146239	A	G	rs12042083	LOC105376845	0.2095	1.06986	0.010551	1.04918	1.09094	6.78047	1.24e-11	10.9058	10.5279	0.483615	0	12	723937	++--+++-++++
W	EUR	1	22146917	C	T	rs7515106	LOC105376845	0.209913	1.07229	0.0106	1.05151	1.09348	6.9922	2.81e-12	11.551	9.35872	0.588818	0	12	723937	++--+++-++++
W	EUR	1	22153666	G	A	rs7517829	LOC105376845	0.390281	1.06812	0.009116	1.05026	1.08629	7.65738	1.99e-14	13.7022	13.7562	0.184407	0.273053	11	714850	++?++++--+++
W	EUR	1	22153726	C	T	rs10917162	LOC105376845	0.315679	1.0766	0.009889	1.05722	1.09634	7.9625	1.77e-15	14.7522	11.1596	0.192819	0.283129	9	666543	++??+++--++?
W	EUR	1	22153748	C	T	rs10917163	LOC105376845	0.306911	1.07424	0.009776	1.05508	1.09375	7.79882	6.55e-15	14.184	12.7353	0.174955	0.293302	10	694973	++?-+++-+++?
W	EUR	1	22153819	G	A	rs4623666	LOC105376845	0.405961	1.06455	0.009255	1.04641	1.08301	7.13357	1.02e-12	11.9923	9.32844	0.315351	0.142408	9	666543	++??+++--++?
W	EUR	1	22156136	T	G	rs12410251	LOC105376845	0.214746	1.08262	0.010851	1.06135	1.10431	7.84244	4.63e-15	14.3343	8.51509	0.483182	0	10	675630	++-?+++-+++?
W	EUR	1	22157091	A	G	rs2744701	LOC105376845	0.373756	0.939376	0.008028	0.92364	0.955379	-7.25617	4.15e-13	12.382	8.01393	0.627476	0	11	714850	--?----+----
W	EUR	1	22157137	T	C	rs2744702	LOC105376845	0.377039	0.938874	0.008175	0.922851	0.955174	-7.18221	7.14e-13	12.1462	7.5075	0.584435	0	10	694973	--?----+---?
W	EUR	1	22158082	C	T	rs3971300	LOC105376845/LOC105376850	0.269503	1.07193	0.009793	1.05273	1.09147	7.53439	5.13e-14	13.2902	12.5285	0.325257	0.122	12	723937	++-++++-++++
W	EUR	1	22158974	G	A	rs2807365	LOC105376845/LOC105376850	0.332507	1.05973	0.009168	1.04176	1.07801	6.64867	3.06e-11	10.5139	4.80412	0.94028	0	12	723937	+++++++-++++
W	EUR	1	22159184	G	A	rs12093861	LOC105376845/LOC105376850	0.396567	1.06898	0.009125	1.0511	1.08717	7.74942	9.67e-15	14.0147	12.6794	0.242152	0.21132	11	704060	+++++++-+++?
W	EUR	1	22159378	G	T	rs16826658	LOC105376845/LOC105376850	0.38308	1.08005	0.009303	1.06181	1.09859	8.86447	8.14e-19	18.0895	14.0092	0.172573	0.286183	11	695507	+++?+++-++++
W	EUR	1	22159520	T	A	rs12094994	LOC105376845/LOC105376850	0.208787	1.08553	0.011192	1.06359	1.10791	7.87877	3.47e-15	14.4601	12.1819	0.20325	0.261197	10	645497	++--?++-+?++
W	EUR	1	22159536	G	A	rs56104760	LOC105376845/LOC105376850	0.186337	1.10432	0.011342	1.08209	1.12701	9.56421	1.2e-21	20.919	6.88875	0.80802	0	12	723937	++-++++-++++
W	EUR	1	22160543	C	T	rs2744721	LOC105376845/LOC105376850	0.572289	1.06986	0.009245	1.05174	1.0883	7.74879	9.71e-15	14.0126	10.1146	0.430496	0.0113321	11	704060	+++-+++-+++?
W	EUR	1	22164231	A	C	rs7521902	LOC105376850	0.228979	1.09353	0.010716	1.07253	1.11495	9.03677	1.71e-19	18.7667	11.096	0.350092	0.0987704	11	704060	+++++++-+++?
W	EUR	1	22164872	C	T	rs2807358	LOC105376850	0.605331	1.05896	0.009001	1.04131	1.0769	6.68318	2.42e-11	10.6158	14.8489	0.13767	0.326548	11	714850	++?-+++-++++
W	EUR	1	22165350	G	A	rs4654785	LOC105376850	0.249456	1.07783	0.010198	1.05784	1.09819	7.84759	4.45e-15	14.3521	10.9127	0.364357	0.0836397	11	714850	++?++++-++++
W	EUR	1	22166029	T	C	rs2223480	LOC105376850	0.592959	1.05592	0.008987	1.0383	1.07383	6.33934	2.38e-10	9.62305	13.4445	0.199869	0.256202	11	714850	++?-+++-++++
W	EUR	1	22166245	C	T	rs2206301	LOC105376850	0.617249	1.05722	0.009076	1.03943	1.07531	6.42686	1.35e-10	9.87096	12.6492	0.243954	0.209434	11	714850	++?-+++-++++
W	EUR	1	22166394	C	G	rs3920498	LOC105376850	0.187167	1.09181	0.011355	1.06955	1.11453	8.35935	6.64e-17	16.1776	12.6978	0.313532	0.133711	12	723937	++--+++-++++
W	EUR	1	22172272	A	C	rs2179378	LOC105376850	0.236027	1.05908	0.010524	1.03845	1.08012	5.71982	1.09e-08	7.96098	11.4016	0.327094	0.122933	11	695507	+++?++---+++
W	EUR	1	22172331	G	C	rs1014987	LOC105376850	0.230739	1.05777	0.010403	1.03738	1.07856	5.65535	1.59e-08	7.79734	11.7554	0.382304	0.064263	12	723937	++++++---+++
W	EUR	1	22175353	G	A	rs742356	LOC105376850	0.236174	1.05882	0.010675	1.03789	1.08016	5.61249	2.04e-08	7.68954	11.1171	0.267766	0.190438	10	675630	+++?++---++?
W	EUR	1	22230251	T	A	rs10917181	LOC107985377	0.258004	1.05302	0.009843	1.03372	1.07267	5.47559	4.46e-08	7.35038	13.6062	0.255552	0.191548	12	723937	++++++++-+++
W	EUR	1	22233437	C	T	rs2807323	LOC107985377	0.333846	1.04948	0.009133	1.03158	1.06769	5.50189	3.85e-08	7.41493	13.1548	0.283328	0.163804	12	723937	+++-++-+-+++
W	EUR	1	22237697	G	A	rs2807327	LOC107985377	0.332059	1.04925	0.00915	1.03132	1.0675	5.4661	4.71e-08	7.32715	11.9017	0.371078	0.075762	12	723937	+++-++++-+++
W	EUR	1	22245630	G	A	rs7553227	LOC107985377	0.411429	0.954307	0.007964	0.938698	0.970176	-5.55849	2.79e-08	7.5548	5.51511	0.903683	0	12	723937	------------
W	EUR	1	169121510	C	T	rs145163454	ATP1B1	0.023866	0.850684	0.023674	0.804284	0.899761	-5.65107	1.63e-08	7.78655	16.273	0.131294	0.324035	12	723937	---+--------
W	EUR	1	169191220	T	C	rs144737447	NME7	0.025078	0.854217	0.023087	0.808967	0.901998	-5.67431	1.43e-08	7.8453	16.6492	0.118689	0.339307	12	723937	---+--------
W	EUR	1	169238941	T	C	rs2227246	NME7	0.97459	1.17705	0.033301	1.11178	1.24615	5.60032	2.19e-08	7.65906	14.5922	0.102763	0.383233	10	675630	+++?+++++++?
W	EUR	1	169465789	T	C	rs2678166	SLC19A2	0.977234	1.19236	0.03467	1.12441	1.26442	5.87667	4.3e-09	8.3664	14.1436	0.166544	0.292964	11	695507	+++?++++++++
W	EUR	1	169498416	A	G	rs1894692	LOC120893165/F5	0.975651	1.20341	0.033931	1.1369	1.27381	6.38363	1.79e-10	9.7481	10.2851	0.41585	0.0277166	11	695507	+++?++++++++
W	EUR	1	169549811	T	C	rs6025	F5	0.024985	0.843711	0.02365	0.797356	0.89276	-5.89464	3.86e-09	8.41352	14.202	0.11532	0.366285	10	675630	--+?-------?
W	EUR	2	11514406	T	C	rs13430148	GREB1	0.132499	1.09381	0.013238	1.06787	1.12039	7.32085	2.57e-13	12.5902	9.1054	0.612164	0	12	723937	+++++++-++++
W	EUR	2	11514462	C	T	rs13395155	GREB1	0.133072	1.09848	0.013521	1.07198	1.12564	7.53834	4.97e-14	13.3033	9.18307	0.514822	0	11	704060	+++++++-+++?
W	EUR	2	11514748	T	C	rs61362255	GREB1	0.132822	1.09452	0.013224	1.0686	1.12106	7.38584	1.58e-13	12.8012	9.77113	0.551084	0	12	723937	+++++++-++++
W	EUR	2	11515361	T	G	rs13407457	GREB1	0.13272	1.09461	0.01323	1.06868	1.12118	7.39044	1.53e-13	12.8162	9.62842	0.564088	0	12	723937	+++++++-++++
W	EUR	2	11515558	T	G	rs13407702	GREB1	0.12719	1.09899	0.013501	1.07253	1.12611	7.59076	3.33e-14	13.4782	8.64384	0.65473	0	12	723937	+++++++-++++
W	EUR	2	11516184	G	A	rs16857565	GREB1	0.135282	1.0949	0.013147	1.06913	1.12129	7.46128	8.95e-14	13.0483	10.7229	0.466757	0	12	723937	+++++++-++++
W	EUR	2	11516381	T	C	rs13418262	GREB1	0.135328	1.09462	0.013165	1.06881	1.12104	7.42781	1.15e-13	12.9384	10.63	0.474759	0	12	723937	+++++++-++++
W	EUR	2	11516782	G	A	rs13383410	GREB1	0.132858	1.09479	0.013215	1.06888	1.12132	7.41297	1.29e-13	12.8898	9.46433	0.579113	0	12	723937	+++++++-++++
W	EUR	2	11517874	T	C	rs13424905	GREB1	0.13265	1.0952	0.013253	1.06922	1.12181	7.42517	1.18e-13	12.9297	9.07601	0.614876	0	12	723937	+++++++-++++
W	EUR	2	11518846	T	C	rs7580473	GREB1	0.128691	1.10124	0.013511	1.07476	1.12837	7.76523	8.54e-15	14.0688	8.6906	0.650427	0	12	723937	+++++++-++++
W	EUR	2	11519075	C	T	rs7597108	GREB1	0.139185	1.09388	0.016516	1.06151	1.12724	5.85493	4.9e-09	8.30959	9.26865	0.506812	0	11	595766	?++++++-++++
W	EUR	2	11519874	A	C	rs13432124	GREB1	0.129258	1.10159	0.013502	1.07513	1.12871	7.79882	6.55e-15	14.184	8.31916	0.684461	0	12	723937	+++++++-++++
W	EUR	2	11520489	T	C	rs13432756	GREB1	0.131342	1.09779	0.013442	1.07144	1.12478	7.52741	5.41e-14	13.267	8.82737	0.548561	0	11	714850	++?++++-++++
W	EUR	2	11520829	C	G	rs77294520	GREB1	0.145377	1.09688	0.012921	1.07155	1.1228	7.75843	9.01e-15	14.0455	7.63554	0.664388	0	11	714850	++?++++-++++
W	EUR	2	11521014	C	T	rs10929751	GREB1	0.672966	1.06312	0.009693	1.04412	1.08247	6.65288	2.98e-11	10.5263	12.4558	0.188814	0.277446	10	698741	++?+++?+++++
W	EUR	2	11522052	T	C	rs4669743	GREB1	0.730826	1.06026	0.010158	1.04035	1.08055	6.05014	1.49e-09	8.82691	12.7937	0.235437	0.218364	11	714850	++?+-++-++++
W	EUR	2	11523212	T	A	rs35592769	GREB1	0.590454	1.06675	0.009118	1.04888	1.08492	7.49647	6.85e-14	13.1645	8.65553	0.565077	0	11	714850	++?+++++++++
W	EUR	2	11523294	T	C	rs12466575	GREB1	0.731101	1.06341	0.010186	1.04344	1.08375	6.3575	2.12e-10	9.67421	11.6254	0.310906	0.139818	11	714850	++?+-++-++++
W	EUR	2	11524223	T	C	rs7582396	GREB1	0.731367	1.06267	0.010109	1.04286	1.08286	6.33036	2.52e-10	9.59779	12.6727	0.315257	0.13199	12	723937	++++-++-++++
W	EUR	2	11526213	G	T	rs12479436	GREB1	0.592979	1.06338	0.009061	1.04562	1.08144	7.15109	8.96e-13	12.0477	7.03535	0.796214	0	12	723937	++++++++++++
W	EUR	2	11527501	A	G	rs10803739	GREB1	0.733918	1.05897	0.010152	1.03907	1.07925	5.92047	3.3e-09	8.48149	10.5989	0.477451	0	12	723937	++++++++++++
W	EUR	2	11528467	T	C	rs7597563	GREB1	0.59364	1.06514	0.009262	1.04699	1.08361	7.19555	6.48e-13	12.1886	5.88321	0.751548	0	10	694973	++?++++++++?
W	EUR	2	11530179	T	A	rs10929753	GREB1	0.583792	1.06751	0.009046	1.04978	1.08554	7.6454	2.18e-14	13.6617	7.70793	0.739204	0	12	723937	++++++++++++
W	EUR	2	11533908	G	A	rs11684917	GREB1	0.131633	1.10088	0.013404	1.0746	1.12779	7.79844	6.57e-15	14.1827	3.61477	0.963057	0	11	714850	++?++++-++++
W	EUR	2	11534169	C	A	rs11685032	GREB1	0.586567	1.06795	0.009113	1.05009	1.08612	7.63959	2.28e-14	13.6422	6.57965	0.764443	0	11	714850	++?+++++++++
W	EUR	2	11540277	T	C	rs35417544	GREB1	0.713476	1.05604	0.00995	1.03653	1.07591	5.73298	1.01e-08	7.99459	10.4374	0.491527	0	12	723937	++++-+++++++
W	EUR	2	11540917	T	G	rs13021546	GREB1	0.721045	1.05593	0.01018	1.03598	1.07627	5.59169	2.3e-08	7.6375	9.47547	0.487651	0	11	704060	++++-++++++?
W	EUR	2	11541442	C	T	rs4669744	GREB1	0.732487	1.0607	0.010905	1.03933	1.08252	5.67421	1.43e-08	7.84502	7.16685	0.411717	0.0232804	8	607980	++???++++?++
W	EUR	2	11541453	G	C	rs9789514	GREB1	0.732177	1.06128	0.010837	1.04004	1.08295	5.76554	8.35e-09	8.07807	7.14035	0.521568	0	9	617067	+++??++++?++
W	EUR	2	11541892	A	G	rs4669746	GREB1	0.714561	1.05643	0.009956	1.03692	1.07631	5.77102	8.09e-09	8.09216	10.851	0.455826	0	12	723937	++++-+++++++
W	EUR	2	11542670	T	A	rs12620490	GREB1	0.723091	1.06152	0.010832	1.04029	1.08319	5.79234	7.13e-09	8.14713	8.16873	0.61236	0	11	584345	++++-+++++?+
W	EUR	2	11542948	G	T	rs10929754	GREB1	0.714635	1.05656	0.009962	1.03704	1.07646	5.78137	7.61e-09	8.11883	11.2238	0.424712	0.0199369	12	723937	++++-+++++++
W	EUR	2	11543198	A	G	rs7568108	GREB1	0.722003	1.05633	0.010197	1.03635	1.0767	5.62322	1.92e-08	7.71645	9.70647	0.466612	0	11	704060	++++-++++++?
W	EUR	2	11543297	T	G	rs7568223	GREB1	0.721794	1.05653	0.010196	1.03655	1.0769	5.64421	1.7e-08	7.76925	9.62698	0.473806	0	11	704060	++++-++++++?
W	EUR	2	11543324	C	T	rs7558961	GREB1	0.721289	1.05729	0.010025	1.03764	1.07731	5.82035	6.03e-09	8.21963	9.70501	0.557101	0	12	723937	++++-+++++++
W	EUR	2	11543505	G	A	rs7609384	GREB1	0.721212	1.0571	0.010025	1.03745	1.07712	5.80105	6.77e-09	8.16965	9.58388	0.568159	0	12	723937	++++-+++++++
W	EUR	2	11543772	A	C	rs12994182	GREB1	0.721429	1.05736	0.01003	1.0377	1.07739	5.82495	5.87e-09	8.23157	9.58547	0.568014	0	12	723937	++++-+++++++
W	EUR	2	11543839	T	C	rs12994384	GREB1	0.6319	1.05179	0.009421	1.03333	1.07059	5.58805	2.35e-08	7.6284	6.53373	0.768608	0	11	704060	++++++-++++?
W	EUR	2	11543881	G	C	rs11686574	GREB1	0.629938	1.05242	0.009265	1.03427	1.0709	5.7543	8.93e-09	8.04921	5.8199	0.885106	0	12	723937	++++++-+++++
W	EUR	2	11544189	T	C	rs4669747	GREB1	0.721152	1.05738	0.010028	1.03773	1.07741	5.82845	5.75e-09	8.24066	9.26425	0.597515	0	12	723937	++++-+++++++
W	EUR	2	11544279	C	T	rs4668730	GREB1	0.721585	1.05756	0.010038	1.03788	1.07761	5.84105	5.33e-09	8.27342	9.65966	0.561236	0	12	723937	++++-+++++++
W	EUR	2	11544358	G	A	rs11692588	GREB1	0.58643	1.06404	0.009129	1.04615	1.08224	7.17432	7.57e-13	12.1212	5.76516	0.834592	0	11	714850	++?+++++++++
W	EUR	2	11545432	G	A	rs12623299	GREB1	0.7107	1.05349	0.009879	1.03412	1.07321	5.50528	3.77e-08	7.42325	8.08783	0.705416	0	12	723937	++++-+++++++
W	EUR	2	11562535	C	A	rs10929757	GREB1	0.569727	1.05822	0.009343	1.03991	1.07685	6.35416	2.16e-10	9.66481	6.14938	0.724879	0	10	694973	++?-+++++++?
W	EUR	2	11564710	T	G	rs1898003	GREB1	0.569237	1.06162	0.009119	1.04375	1.0798	6.90232	5.31e-12	11.2748	7.38153	0.597461	0	10	694973	++?++++++++?
W	EUR	2	11571949	T	G	rs13028479	GREB1	0.545628	1.05691	0.008898	1.03947	1.07464	6.52044	7.25e-11	10.1397	17.116	0.071836	0.415753	11	714850	++?+++-+++++
W	EUR	2	11578465	T	C	rs1529868	GREB1	0.578847	1.06364	0.009348	1.04532	1.08228	6.9597	3.54e-12	11.4507	25.2628	0.002694	0.643744	10	694973	++?--++++--?
W	EUR	2	11578732	C	T	rs7578132	GREB1	0.529553	1.05631	0.009135	1.0384	1.07452	6.28025	3.49e-10	9.45749	19.2268	0.023332	0.531903	10	694973	++?+-++++++?
W	EUR	2	11581409	G	T	rs11674184	GREB1	0.372908	0.934433	0.008226	0.918311	0.950839	-7.63691	2.33e-14	13.6332	23.3139	0.005528	0.613965	10	694973	--?---+--+-?
W	EUR	2	11581886	G	C	rs10929759	GREB1	0.475013	0.946145	0.007946	0.930572	0.961979	-6.53759	6.47e-11	10.1893	20.2234	0.027209	0.505525	11	695507	---?+-------
W	EUR	2	11581956	T	C	rs10200851	GREB1	0.476518	0.94708	0.008085	0.931234	0.963196	-6.31594	2.77e-10	9.55729	20.9294	0.012968	0.569982	10	675630	---?+-----+?
W	EUR	2	11581976	T	A	rs10165819	GREB1	0.477274	0.94721	0.007953	0.931622	0.963058	-6.40634	1.54e-10	9.81254	21.2003	0.01974	0.528308	11	695507	---?+-----+-
W	EUR	2	11582342	A	G	rs11679605	GREB1	0.292623	0.948259	0.008636	0.931333	0.965493	-5.78149	7.6e-09	8.11913	15.1233	0.176921	0.272646	12	723937	---++--+-+--
W	EUR	2	11582449	G	A	rs11674605	GREB1	0.481723	0.953121	0.00786	0.937716	0.968779	-5.77538	7.88e-09	8.1034	28.4567	0.002754	0.613448	12	723937	---++-+--++-
W	EUR	2	11582895	T	C	rs7576826	GREB1	0.485709	0.950596	0.008102	0.934715	0.966746	-5.89465	3.86e-09	8.41355	25.1566	0.002803	0.642241	10	675630	---?+-+--++?
W	EUR	2	11582984	A	G	rs16857668	GREB1	0.351936	0.929714	0.008253	0.913537	0.946177	-8.13787	4.23e-16	15.3738	16.3674	0.059594	0.450127	10	675630	---?-------?
W	EUR	2	11583732	A	G	rs1865573	GREB1	0.347402	0.932335	0.008029	0.916597	0.948342	-8.0668	7.58e-16	15.1203	21.5404	0.028186	0.489331	12	723937	---+--------
W	EUR	2	11584349	G	A	rs9287734	GREB1	0.492071	0.946408	0.007915	0.930893	0.962181	-6.53168	6.73e-11	10.1722	30.7471	0.000646	0.674766	11	695507	---?+-+--++-
W	EUR	2	11584454	T	G	rs9789525	GREB1	0.337417	0.930111	0.008249	0.913943	0.946564	-8.09814	5.86e-16	15.2318	17.109	0.071986	0.415513	11	704060	---------+-?
W	EUR	2	11584558	G	A	rs9789414	GREB1	0.471687	0.946478	0.007907	0.93098	0.962233	-6.53046	6.78e-11	10.1687	29.9898	0.00159	0.633208	12	723937	----+-+--++-
W	EUR	2	11584923	C	T	rs12468019	GREB1	0.479235	0.948883	0.007822	0.933552	0.964466	-6.31354	2.81e-10	9.55057	32.7152	0.000585	0.663765	12	723937	---++-+--++-
W	EUR	2	11585115	A	G	rs12470971	GREB1	0.335789	0.9292	0.008114	0.913295	0.945381	-8.33658	8.05e-17	16.094	14.4841	0.207354	0.240546	12	723937	------------
W	EUR	2	11586961	T	G	rs17529680	GREB1	0.286685	0.939979	0.0086	0.923122	0.957143	-6.70441	2.1e-11	10.6787	12.7719	0.308496	0.138734	12	723937	---++--+-+--
W	EUR	2	11587381	A	G	rs13394619	GREB1	0.48803	0.946479	0.008042	0.930717	0.962509	-6.41952	1.41e-10	9.85006	31.2739	0.000266	0.71222	10	675630	--+?+-+--++?
W	EUR	2	11587862	C	G	rs4669752	GREB1	0.488227	0.945764	0.00791	0.930261	0.961526	-6.61254	3.91e-11	10.4077	31.725	0.000445	0.684791	11	695507	--+?+-+--++-
W	EUR	2	11587954	A	G	rs4669753	GREB1	0.343365	0.932103	0.008053	0.91632	0.948157	-8.06978	7.4e-16	15.1309	23.253	0.016277	0.526944	12	723937	---+-----+--
W	EUR	2	11587963	T	C	rs4669754	GREB1	0.336237	0.929189	0.008123	0.913267	0.945389	-8.32842	8.63e-17	16.0641	17.4429	0.095441	0.36937	12	723937	-------+----
W	EUR	2	11588255	C	T	rs6746291	GREB1	0.485206	0.94458	0.007904	0.929088	0.96033	-6.75751	1.46e-11	10.837	30.6368	0.000673	0.673595	11	695507	---?+-+--++-
W	EUR	2	11588262	C	T	rs59129126	GREB1	0.349009	0.928659	0.008127	0.91273	0.944866	-8.38461	5.36e-17	16.2706	16.8607	0.077504	0.406904	11	695507	---?-----+--
W	EUR	2	11589480	G	A	rs2358039	GREB1	0.309886	0.9441	0.008437	0.927563	0.960932	-6.38003	1.83e-10	9.73792	21.9253	0.024959	0.498295	12	723937	--+++--+-+--
W	EUR	2	11591648	G	T	rs2358040	GREB1	0.488562	0.945969	0.008054	0.930183	0.962024	-6.46905	1.02e-10	9.99165	30.9348	0.000304	0.709065	10	675630	--+?+----++?
W	EUR	2	11591720	C	T	rs2884374	GREB1	0.488316	0.945215	0.007914	0.929705	0.960985	-6.67433	2.57e-11	10.5896	31.0254	0.000581	0.677684	11	695507	--+?+----++-
W	EUR	2	11593362	T	G	rs57439315	GREB1	0.336393	0.929325	0.008272	0.913113	0.945826	-8.1628	3.44e-16	15.4632	19.9662	0.029574	0.499155	11	704060	---+---+---?
W	EUR	2	11594189	C	T	rs9798272	GREB1	0.478417	0.947541	0.007817	0.932218	0.963114	-6.47847	9.58e-11	10.0187	32.2539	0.000694	0.658956	12	723937	---++----+--
W	EUR	2	11594209	C	A	rs9678410	GREB1	0.480677	0.948121	0.007829	0.932776	0.963718	-6.39928	1.61e-10	9.7925	32.4907	0.000636	0.661442	12	723937	---++--+-++-
W	EUR	2	11594754	G	A	rs12993278	GREB1	0.478204	0.947251	0.007819	0.931926	0.962828	-6.5119	7.67e-11	10.115	31.3696	0.000962	0.649342	12	723937	---++----+--
W	EUR	2	11594779	A	G	rs13016186	GREB1	0.477348	0.947026	0.007818	0.931703	0.962601	-6.53996	6.37e-11	10.1962	30.7212	0.00122	0.641941	12	723937	---++----+--
W	EUR	2	11594783	G	C	rs13017593	GREB1	0.477338	0.946926	0.007817	0.931605	0.9625	-6.55234	5.86e-11	10.2321	30.62	0.001265	0.640758	12	723937	---++----+--
W	EUR	2	11594935	A	C	rs28689909	GREB1	0.339071	0.929253	0.008076	0.913424	0.945356	-8.37059	6.04e-17	16.2189	17.1933	0.102285	0.360217	12	723937	---+---+----
W	EUR	2	11594989	C	T	rs12473442	GREB1	0.472384	0.933565	0.008813	0.916291	0.951165	-7.21438	5.64e-13	12.2485	20.1541	0.005246	0.652676	8	486028	---+?--+-???
W	EUR	2	11595911	G	A	rs11679686	GREB1	0.46856	0.945134	0.007956	0.92954	0.960989	-6.64822	3.07e-11	10.5126	29.8919	0.000892	0.665461	11	714850	--?++--+-++-
W	EUR	2	11599242	T	G	rs10929760	GREB1	0.355652	0.942477	0.008166	0.926472	0.958759	-6.77937	1.25e-11	10.9025	21.1261	0.020231	0.526651	11	714850	--?++-------
W	EUR	2	11602332	G	A	rs72772088	GREB1	0.355303	0.942279	0.008283	0.926045	0.958798	-6.70529	2.08e-11	10.6814	20.1712	0.016885	0.553818	10	694973	--?++------?
W	EUR	2	11602728	A	C	rs62118315	GREB1	0.30086	0.942642	0.008553	0.925878	0.95971	-6.45188	1.14e-10	9.94243	16.7968	0.078982	0.404649	11	714850	--?++--+----
W	EUR	2	11604447	A	G	rs7571803	GREB1	0.446093	1.05303	0.00879	1.0358	1.07055	6.13983	8.51e-10	9.07003	18.9048	0.041489	0.471034	11	714850	++?-++--++++
W	EUR	2	11604568	T	C	rs746579	GREB1	0.295649	0.9407	0.008698	0.923652	0.958063	-6.55117	5.91e-11	10.2287	12.8884	0.229979	0.224108	11	704060	--+-+--+---?
W	EUR	2	11605877	A	G	rs34532804	GREB1	0.442069	1.05782	0.009049	1.04008	1.07585	6.51543	7.5e-11	10.1252	12.4875	0.187202	0.279277	10	675630	+++?+++-+++?
W	EUR	2	11606051	T	C	rs12615856	GREB1	0.441695	1.05642	0.008905	1.03896	1.07416	6.45646	1.11e-10	9.95556	13.0724	0.219654	0.235027	11	695507	+++?+++-++++
W	EUR	2	11606845	C	T	rs7570566	GREB1	0.491777	1.04904	0.00903	1.03135	1.06705	5.51544	3.56e-08	7.44829	14.9044	0.093597	0.39615	10	645497	+++-?+--+?++
W	EUR	2	11607834	C	T	rs12476152	GREB1	0.490923	1.0478	0.00879	1.03057	1.06531	5.51954	3.48e-08	7.45839	15.2306	0.123878	0.343427	11	704060	+++-++--+++?
W	EUR	2	11607911	A	G	rs12478958	GREB1	0.444147	1.05777	0.009047	1.04004	1.07581	6.51156	7.69e-11	10.114	11.9209	0.217808	0.245021	10	675630	+++?+++-+++?
W	EUR	2	11608280	C	T	rs12476319	GREB1	0.491021	1.04794	0.008666	1.03096	1.06521	5.61664	2e-08	7.69993	14.6641	0.198397	0.249868	12	723937	+++-++--++++
W	EUR	2	11608459	A	C	rs4669755	GREB1	0.313689	0.943468	0.008434	0.926937	0.960294	-6.45229	1.14e-10	9.94362	16.2921	0.130629	0.324825	12	723937	--+++--+----
W	EUR	2	11609975	G	A	rs3762581	GREB1	0.492705	1.04787	0.008687	1.03085	1.06518	5.59503	2.26e-08	7.64584	17.8961	0.084024	0.38534	12	723937	+++-++--++++
W	EUR	2	67550026	G	C	rs4671806	LOC124906017	0.81396	0.942487	0.009913	0.923058	0.962325	-5.57358	2.56e-08	7.59233	16.9241	0.11014	0.35004	12	723937	---+----+--+
W	EUR	2	67555603	C	A	rs4233939	LOC105374786	0.79436	0.943847	0.009486	0.925255	0.962813	-5.69332	1.28e-08	7.89351	15.6982	0.152712	0.299281	12	723937	--------+--+
W	EUR	2	67560216	G	T	rs4533457	LOC105374786	0.79983	0.941881	0.009584	0.923097	0.961047	-5.82585	5.84e-09	8.2339	17.0058	0.107705	0.353161	12	723937	--------+--+
W	EUR	2	67567344	T	C	rs11126138	LINC02831	0.791042	0.944546	0.009432	0.926059	0.963401	-5.65733	1.58e-08	7.80235	15.5167	0.160041	0.291088	12	723937	--------+--+
W	EUR	2	67567457	C	G	rs2861640	LINC02831	0.792094	0.943952	0.009439	0.925451	0.962823	-5.71143	1.15e-08	7.93958	14.8387	0.189999	0.258697	12	723937	--------+--+
W	EUR	2	67568330	T	A	rs2902007	LINC02831	0.791083	0.943689	0.009418	0.925229	0.962517	-5.75038	9.14e-09	8.03915	14.7586	0.19382	0.254669	12	723937	--------+--+
W	EUR	2	67572832	G	A	rs2861644	LINC02831	0.798038	0.941759	0.009533	0.923075	0.960822	-5.8691	4.5e-09	8.34659	17.5662	0.092208	0.373797	12	723937	---+----+--+
W	EUR	2	67573206	A	T	rs2861645	LINC02831	0.797516	0.94097	0.009521	0.922309	0.960008	-5.9537	2.7e-09	8.56933	17.9826	0.081985	0.388298	12	723937	---+----+--+
W	EUR	2	67575818	C	T	rs2902008	LOC105374786	0.796617	0.941519	0.009504	0.922891	0.960524	-5.91034	3.51e-09	8.45479	18.964	0.061743	0.419954	12	723937	---+----+--+
W	EUR	2	67576776	T	C	rs2861648	LOC105374786	0.790589	0.944827	0.009413	0.926379	0.963643	-5.64107	1.73e-08	7.76135	16.3653	0.128102	0.327846	12	723937	---+----+--+
W	EUR	2	67588181	T	A	rs7598280	LOC105374786	0.797053	0.943162	0.009526	0.92449	0.962211	-5.73598	9.95e-09	8.00226	18.4068	0.072609	0.402395	12	723937	---+----+--+
W	EUR	2	67593125	C	T	rs7425711	LOC105374786	0.796595	0.941843	0.009513	0.923198	0.960864	-5.87335	4.39e-09	8.35772	19.6652	0.05015	0.440635	12	723937	---+----+--+
W	EUR	2	67600284	A	G	rs4671811	LOC105374786	0.791833	0.943344	0.009425	0.924871	0.962186	-5.78036	7.65e-09	8.11622	16.7025	0.116989	0.341415	12	723937	---+----+--+
W	EUR	2	67601661	G	C	rs6546317	LOC105374786	0.7971	0.941422	0.009518	0.922766	0.960455	-5.91093	3.5e-09	8.45634	18.5724	0.069215	0.407722	12	723937	---+----+--+
W	EUR	2	67603007	G	A	rs2861681	LOC105374786	0.797283	0.941416	0.009516	0.922765	0.960443	-5.91325	3.45e-09	8.46245	18.4335	0.072052	0.40326	12	723937	---+----+--+
W	EUR	2	67603147	G	A	rs2902023	LOC105374786	0.797309	0.941645	0.009519	0.922988	0.960679	-5.88886	4e-09	8.39835	18.8061	0.064665	0.415083	12	723937	---+----+--+
W	EUR	2	67605354	T	C	rs4671812	LOC105374786	0.796202	0.942922	0.009513	0.924276	0.961944	-5.76753	8.26e-09	8.08319	19.2461	0.056816	0.428457	12	723937	---+----+--+
W	EUR	2	67610919	T	A	rs2861686	LOC105374786	0.797127	0.94195	0.009515	0.9233	0.960976	-5.86136	4.72e-09	8.32638	18.2885	0.075123	0.398529	12	723937	---+----+--+
W	EUR	2	67611052	G	C	rs2861687	LOC105374786	0.796912	0.942131	0.009514	0.923483	0.961154	-5.84451	5.22e-09	8.28242	17.8207	0.085837	0.382739	12	723937	---+----+--+
W	EUR	2	67611472	C	G	rs2861689	LOC105374786	0.79698	0.942002	0.009515	0.923353	0.961029	-5.85628	4.86e-09	8.3131	18.0583	0.080238	0.390861	12	723937	---+----+--+
W	EUR	2	67613269	C	T	rs11900280	LOC105374786	0.797583	0.939888	0.009514	0.921241	0.958913	-6.06338	1.37e-09	8.86259	19.2576	0.056623	0.428797	12	723937	---+----+--+
W	EUR	2	67614703	T	A	rs4671813	LOC105374786	0.796887	0.941734	0.009516	0.923082	0.960762	-5.88193	4.17e-09	8.38019	18.7372	0.065977	0.412933	12	723937	---+----+--+
W	EUR	2	67614723	G	A	rs4671192	LOC105374786	0.805856	0.937973	0.009796	0.918772	0.957575	-6.06806	1.33e-09	8.87523	16.4399	0.087714	0.391723	11	695507	---?----+--+
W	EUR	2	67615292	G	A	rs2902025	LOC105374786	0.796875	0.94208	0.009518	0.923424	0.961113	-5.84662	5.15e-09	8.28793	18.7337	0.066045	0.412822	12	723937	---+----+--+
W	EUR	2	67615734	T	A	rs4362541	LOC105374786	0.796004	0.942393	0.00951	0.923753	0.96141	-5.82105	6.01e-09	8.22143	19.6551	0.050302	0.440348	12	723937	---+----+--+
W	EUR	2	67616405	A	G	rs4260227	LOC105374786	0.790214	0.945037	0.009417	0.92658	0.963862	-5.61764	1.98e-08	7.70244	17.4595	0.095	0.369969	12	723937	--------+--+
W	EUR	2	67617667	A	C	rs6717863	LOC105374786	0.795639	0.942655	0.009508	0.924019	0.961666	-5.79691	6.94e-09	8.15893	19.0468	0.060259	0.422474	12	723937	---+----+--+
W	EUR	2	67617889	C	A	rs6746394	LOC105374786	0.797328	0.94069	0.009518	0.922035	0.959723	-5.98253	2.26e-09	8.64592	19.8419	0.047556	0.445618	12	723937	---+----+--+
W	EUR	2	67618607	G	A	rs2861694	LOC105374786	0.68419	0.934746	0.008198	0.918678	0.951095	-7.62772	2.5e-14	13.6022	16.869	0.111811	0.347915	12	723937	-----------+
W	EUR	2	67619595	G	A	rs2861695	LOC105374786	0.795618	0.94254	0.009507	0.923907	0.961549	-5.80882	6.46e-09	8.18974	19.3826	0.054562	0.43248	12	723937	---+----+--+
W	EUR	2	67620922	T	C	rs6730286	LOC105374786	0.795828	0.942806	0.009516	0.924155	0.961834	-5.7771	7.8e-09	8.10782	19.3587	0.054951	0.43178	12	723937	---+----+--+
W	EUR	2	67623488	C	A	rs4410279	LOC105374786	0.796348	0.94165	0.009515	0.923001	0.960677	-5.89067	3.95e-09	8.4031	20.5495	0.03835	0.464707	12	723937	---+----+--+
W	EUR	2	67624689	C	A	rs6546320	LOC105374786	0.797336	0.940696	0.009522	0.922034	0.959737	-5.97966	2.3e-09	8.63829	19.4015	0.054256	0.433033	12	723937	---+----+--+
W	EUR	2	67625121	C	T	rs6546322	LOC105374786	0.797427	0.941131	0.009529	0.922454	0.960186	-5.93264	3.06e-09	8.5136	19.9495	0.046037	0.448609	12	723937	---+----+--+
W	EUR	2	67627676	G	A	rs2861698	LOC105374786	0.797123	0.941965	0.009527	0.923292	0.961016	-5.85248	4.97e-09	8.30321	18.5593	0.069477	0.407306	12	723937	---+----+--+
W	EUR	2	67628309	T	C	rs2861700	LOC105374786	0.796031	0.942782	0.009519	0.924125	0.961815	-5.7779	7.76e-09	8.10989	18.6939	0.066814	0.411573	12	723937	---+----+--+
W	EUR	2	67628848	G	T	rs2861701	LOC105374786	0.795251	0.940849	0.009499	0.922231	0.959842	-5.97943	2.3e-09	8.63767	18.4717	0.071262	0.404493	12	723937	---+----+--+
W	EUR	2	67629308	C	G	rs2902026	LOC105374786	0.683471	0.933698	0.008195	0.917636	0.95004	-7.74921	9.68e-15	14.014	16.8648	0.111938	0.347755	12	723937	-----------+
W	EUR	2	67629358	C	A	rs6546324	LOC105374786	0.683875	0.933165	0.008193	0.917107	0.949504	-7.81072	5.96e-15	14.2249	17.9619	0.082468	0.387593	12	723937	-----------+
W	EUR	2	67631371	A	G	rs6752799	LOC105374786	0.79721	0.941761	0.009529	0.923084	0.960817	-5.87102	4.45e-09	8.35163	18.6013	0.068636	0.408645	12	723937	---+----+--+
W	EUR	2	67631534	C	T	rs6710685	LOC105374786	0.682926	0.936383	0.008606	0.919514	0.953561	-7.08692	1.43e-12	11.8458	15.6531	0.047623	0.488919	9	636410	--?-?----?-+
W	EUR	2	67633921	C	T	rs2861703	LOC105374786	0.797345	0.940208	0.009518	0.921553	0.95924	-6.02989	1.69e-09	8.7725	18.8626	0.063605	0.416835	12	723937	--------+--+
W	EUR	2	67634769	A	C	rs6546325	LOC105374786	0.796079	0.942472	0.009525	0.923802	0.961519	-5.80404	6.65e-09	8.17738	18.9474	0.062045	0.419445	12	723937	--------+--+
W	EUR	2	67637126	G	T	rs980227	LOC105374786	0.796066	0.940792	0.009516	0.92214	0.959821	-5.97381	2.38e-09	8.62272	18.5399	0.06987	0.406684	12	723937	---+----+--+
W	EUR	2	67637543	T	C	rs4141819	LOC105374786	0.69254	0.932777	0.008432	0.91625	0.949602	-7.62974	2.46e-14	13.609	19.3478	0.022393	0.53483	10	686420	--??-------+
W	EUR	2	67637612	C	A	rs1430792	LOC105374786	0.797318	0.940953	0.009529	0.922275	0.960008	-5.95004	2.76e-09	8.55963	19.7427	0.048996	0.442833	12	723937	---+----+--+
W	EUR	2	67637668	C	A	rs1430791	LOC105374786	0.797408	0.94119	0.009535	0.922501	0.960257	-5.92323	3.25e-09	8.48876	19.656	0.050288	0.440374	12	723937	---+----+--+
W	EUR	2	67637780	G	T	rs1430790	LOC105374786	0.797271	0.941154	0.009532	0.922472	0.960215	-5.92876	3.14e-09	8.50336	19.8195	0.047878	0.444991	12	723937	---+----+--+
W	EUR	2	67638276	T	C	rs11126143	LOC105374786	0.660817	0.941014	0.008147	0.925046	0.957258	-6.96237	3.48e-12	11.4589	12.7138	0.240118	0.213452	11	714850	--?--------+
W	EUR	2	67639238	C	T	rs1430789	LOC105374786	0.797744	0.941313	0.009591	0.922515	0.960495	-5.87629	4.31e-09	8.3654	20.6592	0.0236	0.515953	11	714850	--?+----+--+
W	EUR	2	67639305	G	T	rs4671817	LOC105374786	0.797603	0.941203	0.009589	0.922407	0.960381	-5.88798	4.02e-09	8.39605	20.1999	0.027418	0.504948	11	714850	--?+----+--+
W	EUR	2	67641280	T	C	rs1430788	LOC105374786	0.682863	0.931998	0.008355	0.915622	0.948666	-7.78674	7.2e-15	14.1425	13.6934	0.133658	0.342748	10	694973	--?--------?
W	EUR	2	67641348	C	A	rs4619594	LOC105374786	0.662916	0.943291	0.008178	0.927263	0.959596	-6.67687	2.53e-11	10.5971	16.5895	0.083954	0.397211	11	714850	--?--------+
W	EUR	2	67641366	T	A	rs1430787	LOC105374786	0.683607	0.935613	0.008268	0.919407	0.952104	-7.4656	8.66e-14	13.0626	20.4584	0.025203	0.511203	11	714850	--?--------+
W	EUR	2	67641600	C	T	rs1023693	LOC105374786	0.79766	0.941731	0.009603	0.922909	0.960937	-5.82838	5.75e-09	8.24048	20.3255	0.02632	0.508007	11	714850	--?+----+--+
W	EUR	2	67641624	C	T	rs1023692	LOC105374786	0.748204	0.933826	0.008791	0.916596	0.951379	-7.20567	6.02e-13	12.2207	16.8341	0.078116	0.405969	11	714850	--?--------+
W	EUR	2	67641662	A	G	rs1023691	LOC105374786	0.797376	0.942897	0.009607	0.924066	0.962111	-5.71283	1.14e-08	7.94314	19.4671	0.034716	0.486312	11	714850	--?+----+--+
W	EUR	2	67642206	C	T	rs9309402	LOC105374786	0.774815	0.936488	0.009866	0.91715	0.956234	-6.16372	7.32e-10	9.13536	17.4115	0.06574	0.425668	11	714850	--?-----+--+
W	EUR	2	67642632	C	A	rs7595894	LOC105374786	0.799019	0.94043	0.009658	0.9215	0.959749	-5.91999	3.31e-09	8.48022	18.9028	0.041514	0.470979	11	714850	--?-----+--+
W	EUR	2	67642640	T	G	rs7569813	LOC105374786	0.798147	0.942825	0.009662	0.923888	0.96215	-5.68735	1.32e-08	7.87834	18.5325	0.046619	0.460406	11	714850	--?-----+--+
W	EUR	2	164531467	G	T	rs939643	GRB14	0.564823	1.05018	0.008778	1.03298	1.06767	5.80993	6.42e-09	8.19261	4.50833	0.952627	0	12	723937	++++-+-+++++
W	EUR	2	164538070	G	T	rs12464825	GRB14	0.560811	1.04764	0.008722	1.03055	1.06502	5.54511	3.01e-08	7.52161	5.09165	0.926647	0	12	723937	++++-+-+++++
W	EUR	2	164544977	G	A	rs11683488	GRB14	0.564881	1.04895	0.008768	1.03177	1.06642	5.67098	1.46e-08	7.83686	4.41684	0.956102	0	12	723937	++++-+-+++++
W	EUR	2	164546028	G	A	rs11894526	GRB14	0.565032	1.04885	0.008768	1.03167	1.06632	5.65869	1.56e-08	7.80577	4.23516	0.962526	0	12	723937	++++-+-+++++
W	EUR	2	164550009	C	T	rs11895606	GRB14	0.563622	1.04742	0.008749	1.03027	1.06485	5.50114	3.86e-08	7.41307	5.55066	0.901603	0	12	723937	++++-+-+++++
W	EUR	2	164554619	T	C	rs3920334	GRB14	0.563567	1.04845	0.008899	1.03101	1.06619	5.52811	3.31e-08	7.47956	6.18858	0.799178	0	11	704060	++++-+-++++?
W	EUR	2	164580069	G	A	rs57793166	GRB14	0.557416	1.04764	0.008809	1.03038	1.0652	5.48948	4.13e-08	7.38443	6.0553	0.869649	0	12	723937	++++-+-+++++
W	EUR	2	164580539	A	T	rs62173866	GRB14	0.556229	1.05079	0.009002	1.03314	1.06873	5.73379	1.01e-08	7.99665	3.65614	0.961529	0	11	707828	++++-+?+++++
W	EUR	2	164581034	G	C	rs1521522	GRB14	0.55724	1.05071	0.009047	1.03298	1.06875	5.69598	1.26e-08	7.90025	4.62633	0.86559	0	10	698741	++?+-+?+++++
W	EUR	2	164581082	G	A	rs1521523	GRB14	0.559425	1.05036	0.009051	1.03262	1.06841	5.65366	1.61e-08	7.79307	4.20099	0.897693	0	10	698741	++?+-+?+++++
W	EUR	3	127996290	G	A	rs1549874	KBTBD12/LOC102723759	0.157016	1.06955	0.011769	1.04648	1.09313	6.04413	1.55e-09	8.81076	6.59324	0.831003	0	12	723937	+++++++-++++
W	EUR	3	127997068	A	T	rs6795314	KBTBD12/LOC102723759	0.156994	1.07072	0.011783	1.04762	1.09432	6.1416	8.42e-10	9.07485	6.19928	0.859742	0	12	723937	+++++++-++++
W	EUR	3	127997419	A	G	rs4857832	KBTBD12/LOC102723759	0.15709	1.0701	0.011759	1.04705	1.09365	6.09889	1.1e-09	8.95864	6.99155	0.799767	0	12	723937	+++++++-++++
W	EUR	3	127997742	G	A	rs9870753	KBTBD12/LOC102723759	0.157717	1.07075	0.011733	1.04775	1.09425	6.17135	6.98e-10	9.15626	6.98691	0.800143	0	12	723937	+++++++-++++
W	EUR	3	127998859	C	T	rs6439104	KBTBD12/LOC102723759	0.15811	1.07078	0.011726	1.0478	1.09427	6.17783	6.7e-10	9.17406	7.04797	0.795186	0	12	723937	+++++++-++++
W	EUR	3	128000815	G	A	rs67986238	KBTBD12/LOC102723759	0.156441	1.06992	0.011769	1.04686	1.0935	6.07775	1.25e-09	8.90139	6.65167	0.82655	0	12	723937	+++++++-++++
W	EUR	3	128001884	C	T	rs1469660	KBTBD12/LOC102723759	0.156412	1.07014	0.011771	1.04707	1.09372	6.09631	1.12e-09	8.95165	6.50638	0.837535	0	12	723937	+++++++-++++
W	EUR	3	128001897	T	C	rs1469659	KBTBD12/LOC102723759	0.156387	1.07016	0.011772	1.04709	1.09374	6.09796	1.11e-09	8.95611	6.42098	0.843852	0	12	723937	+++++++-++++
W	EUR	3	128002198	T	G	rs6781473	KBTBD12/LOC102723759	0.156547	1.06993	0.011944	1.04652	1.09387	5.98876	2.18e-09	8.66253	6.30392	0.789116	0	11	704060	+++++++-+++?
W	EUR	3	128002399	T	C	rs9859280	KBTBD12/LOC102723759	0.156577	1.07045	0.011769	1.04738	1.09402	6.12486	9.35e-10	9.0292	6.61635	0.829247	0	12	723937	+++++++-++++
W	EUR	3	128002490	A	T	rs58170120	KBTBD12/LOC102723759	0.155139	1.07106	0.01182	1.04789	1.09474	6.15252	7.86e-10	9.1047	6.38974	0.846136	0	12	723937	+++++++-++++
W	EUR	3	128002532	C	T	rs28520291	KBTBD12/LOC102723759	0.156567	1.07051	0.011778	1.04742	1.0941	6.12577	9.3e-10	9.0317	6.50212	0.837853	0	12	723937	+++++++-++++
W	EUR	3	128002592	T	C	rs28636854	KBTBD12/LOC102723759	0.156207	1.06931	0.011812	1.04616	1.09297	6.0007	2.02e-09	8.69438	6.61405	0.829422	0	12	723937	+++++++-++++
W	EUR	3	128002625	A	G	rs11924834	KBTBD12/LOC102723759	0.15591	1.07089	0.011851	1.04766	1.09463	6.12167	9.54e-10	9.02054	6.83316	0.812429	0	12	723937	+++++++-++++
W	EUR	3	128002665	A	G	rs11924838	KBTBD12/LOC102723759	0.156185	1.06999	0.011811	1.04684	1.09365	6.0619	1.38e-09	8.85861	6.65005	0.826674	0	12	723937	+++++++-++++
W	EUR	3	128002700	T	A	rs11917022	KBTBD12/LOC102723759	0.156482	1.07081	0.011785	1.04771	1.09442	6.14936	8.02e-10	9.09605	6.77566	0.816949	0	12	723937	+++++++-++++
W	EUR	3	128002760	C	G	rs11924866	KBTBD12/LOC102723759	0.15654	1.07048	0.011773	1.04741	1.09407	6.12627	9.27e-10	9.03307	6.63593	0.827754	0	12	723937	+++++++-++++
W	EUR	3	128003016	A	G	rs10433341	KBTBD12/LOC102723759	0.156696	1.07015	0.011761	1.0471	1.09371	6.10251	1.08e-09	8.96845	6.85222	0.810921	0	12	723937	+++-+++-++++
W	EUR	3	128004165	A	G	rs7633480	KBTBD12/LOC102723759	0.156523	1.07023	0.011766	1.04717	1.0938	6.10676	1.05e-09	8.98	6.75357	0.818674	0	12	723937	+++++++-++++
W	EUR	3	128004174	C	T	rs7645109	KBTBD12/LOC102723759	0.156515	1.0706	0.01177	1.04754	1.09418	6.13844	8.59e-10	9.06625	6.5644	0.833184	0	12	723937	+++++++-++++
W	EUR	3	128004354	G	A	rs7611426	KBTBD12/LOC102723759	0.156487	1.07046	0.011769	1.0474	1.09404	6.12658	9.25e-10	9.03389	6.78991	0.815833	0	12	723937	+++++++-++++
W	EUR	3	128004390	T	C	rs67464627	KBTBD12/LOC102723759	0.15656	1.07092	0.011772	1.04785	1.0945	6.16633	7.2e-10	9.14252	6.63257	0.828011	0	12	723937	+++++++-++++
W	EUR	3	128005302	G	A	rs6767360	KBTBD12/LOC102723759	0.15661	1.07081	0.011766	1.04775	1.09438	6.15894	7.55e-10	9.12226	6.47213	0.840081	0	12	723937	+++++++-++++
W	EUR	3	128007794	G	A	rs6777095	KBTBD12/LOC102723759	0.836178	0.932108	0.010137	0.91224	0.952409	-6.39583	1.65e-10	9.78271	5.88116	0.881175	0	12	723937	-------+----
W	EUR	3	128007894	G	A	rs6777197	KBTBD12/LOC102723759	0.811244	0.930887	0.010656	0.91	0.952253	-6.18569	6.37e-10	9.19565	5.76175	0.834867	0	11	704060	-------+---?
W	EUR	3	128008153	C	A	rs6777484	KBTBD12/LOC102723759	0.831294	0.928807	0.011181	0.906894	0.951251	-6.06266	1.38e-09	8.86066	4.98782	0.758877	0	9	505905	----?--+-??-
W	EUR	3	128008607	C	T	rs6766665	KBTBD12/LOC102723759	0.83618	0.931705	0.010126	0.911857	0.951984	-6.43901	1.24e-10	9.90564	5.88374	0.881008	0	12	723937	-------+----
W	EUR	3	128011923	C	T	rs9824657	KBTBD12/LOC102723759	0.836257	0.931739	0.010126	0.911892	0.952018	-6.43616	1.27e-10	9.89752	6.1171	0.865438	0	12	723937	-------+----
W	EUR	3	128012830	T	C	rs9809866	KBTBD12/LOC102723759	0.834904	0.932262	0.010102	0.912463	0.952491	-6.40423	1.56e-10	9.80656	6.52091	0.836449	0	12	723937	-------+----
W	EUR	3	128014226	G	A	rs4474992	KBTBD12/LOC102723759	0.834994	0.932221	0.010103	0.912418	0.952453	-6.40693	1.53e-10	9.81421	6.73222	0.820336	0	12	723937	-------+----
W	EUR	3	128014248	G	A	rs4602341	KBTBD12/LOC102723759	0.835156	0.931916	0.010104	0.912113	0.952149	-6.43435	1.28e-10	9.89235	6.43123	0.843099	0	12	723937	-------+----
W	EUR	3	128028998	G	A	rs6764517	KBTBD12/LOC102723759	0.83592	0.93156	0.010105	0.911755	0.951796	-6.46596	1.04e-10	9.98279	5.57054	0.90043	0	12	723937	-------+----
W	EUR	3	128036873	A	C	rs1987633	LOC102723759	0.83461	0.932033	0.010081	0.912274	0.95222	-6.43821	1.25e-10	9.90336	5.87116	0.881821	0	12	723937	-------+----
W	EUR	3	128038579	G	A	rs2217629	LOC102723759	0.836781	0.931307	0.010125	0.911462	0.951583	-6.47626	9.72e-11	10.0123	5.37833	0.91147	0	12	723937	-------+----
W	EUR	3	128040371	A	T	rs1469658	LOC102723759	0.835908	0.931801	0.010106	0.911993	0.95204	-6.44327	1.21e-10	9.91783	5.53229	0.902681	0	12	723937	-------+----
W	EUR	3	128040825	T	C	rs1469657	LOC102723759	0.835858	0.931769	0.010106	0.911961	0.952008	-6.44606	1.19e-10	9.92581	5.52635	0.903028	0	12	723937	-------+----
W	EUR	3	128044411	C	T	rs4857834	LOC102723759	0.835899	0.931482	0.010102	0.911682	0.951713	-6.47481	9.81e-11	10.0082	5.51904	0.903454	0	12	723937	-------+----
W	EUR	3	128061239	A	G	rs759945	SEC61A1	0.83462	0.931907	0.010078	0.912154	0.952087	-6.4519	1.14e-10	9.9425	6.29412	0.853037	0	12	723937	-------+----
W	EUR	3	128062894	C	G	rs4857864	SEC61A1	0.834538	0.932452	0.010082	0.912692	0.95264	-6.3997	1.61e-10	9.7937	6.28613	0.853607	0	12	723937	-------+----
W	EUR	3	128063584	C	G	rs9864797	SEC61A1	0.834812	0.931766	0.010081	0.912008	0.951952	-6.46299	1.06e-10	9.97427	6.09939	0.866651	0	12	723937	-------+----
W	EUR	3	128064599	G	A	rs6764003	SEC61A1	0.834659	0.932156	0.010082	0.912396	0.952345	-6.42651	1.35e-10	9.86998	6.24657	0.856416	0	12	723937	-------+----
W	EUR	3	128071701	A	G	rs10934848	RUVBL1	0.83409	0.931636	0.010059	0.91192	0.951777	-6.48898	8.93e-11	10.0489	6.09395	0.867023	0	12	723937	-------+----
W	EUR	3	128071763	A	G	rs2241688	RUVBL1	0.834085	0.931492	0.010056	0.911781	0.951628	-6.50376	8.1e-11	10.0915	5.97152	0.875258	0	12	723937	-------+----
W	EUR	3	128072865	C	T	rs7612065	RUVBL1	0.834842	0.931938	0.010084	0.912173	0.95213	-6.44513	1.19e-10	9.92314	6.26774	0.854916	0	12	723937	-------+----
W	EUR	3	128080826	T	G	rs1554534	RUVBL1	0.834277	0.931792	0.010071	0.912053	0.951958	-6.46695	1.03e-10	9.98563	6.0318	0.871234	0	12	723937	-------+----
W	EUR	3	128088271	A	G	rs6439112	RUVBL1	0.833862	0.92849	0.010477	0.907955	0.949489	-6.50239	8.17e-11	10.0875	4.97248	0.760513	0	9	636410	--?-?--+-?--
W	EUR	3	128089659	G	C	rs7355887	RUVBL1	0.716547	0.944929	0.008537	0.928197	0.961964	-6.21412	5.32e-10	9.27397	8.81339	0.639113	0	12	723937	-+--+--+----
W	EUR	3	128089972	G	A	rs9855015	RUVBL1	0.84413	0.934606	0.010317	0.914386	0.955274	-6.06025	1.4e-09	8.85416	9.25303	0.598549	0	12	723937	-+----++----
W	EUR	3	128096632	C	T	rs4058156	RUVBL1	0.83491	0.931061	0.010066	0.91133	0.951218	-6.53646	6.52e-11	10.186	5.96177	0.875903	0	12	723937	-------+----
W	EUR	3	128097729	G	A	rs6439113	RUVBL1	0.834729	0.931256	0.010065	0.91153	0.95141	-6.51981	7.28e-11	10.1378	5.99886	0.87344	0	12	723937	-------+----
W	EUR	3	128098665	T	C	rs7632756	RUVBL1	0.716225	0.944608	0.008525	0.927899	0.961618	-6.25817	4.02e-10	9.396	9.19112	0.604256	0	12	723937	-+--+--+----
W	EUR	3	128100219	C	G	rs4857866	RUVBL1	0.716314	0.944487	0.008525	0.927778	0.961496	-6.27163	3.69e-10	9.43345	9.3263	0.591801	0	12	723937	-+--+--+----
W	EUR	3	128100308	C	T	rs4857867	RUVBL1	0.83462	0.931756	0.010068	0.912023	0.951916	-6.47209	9.99e-11	10.0004	6.36066	0.848249	0	12	723937	-------+----
W	EUR	3	128103477	C	T	rs7641133	RUVBL1	0.716677	0.944334	0.00853	0.927615	0.961354	-6.28442	3.4e-10	9.46911	9.3854	0.586364	0	12	723937	-+--+--+----
W	EUR	3	128105174	G	A	rs9835383	RUVBL1	0.834728	0.931313	0.010065	0.911585	0.951468	-6.51427	7.55e-11	10.1218	6.06923	0.868705	0	12	723937	-------+----
W	EUR	3	128107775	T	C	rs11924142	RUVBL1	0.839059	0.934122	0.010308	0.913918	0.954772	-6.10868	1.03e-09	8.98522	7.25149	0.701508	0	11	695507	-+-?---+----
W	EUR	3	128116786	G	A	rs6788879	RUVBL1	0.834262	0.931528	0.010046	0.911837	0.951644	-6.50711	7.92e-11	10.1012	6.49935	0.838059	0	12	723937	-------+----
W	EUR	3	128116960	T	C	rs6439115	RUVBL1	0.834249	0.931862	0.010051	0.912162	0.951988	-6.47315	9.92e-11	10.0034	6.47482	0.839882	0	12	723937	-------+----
W	EUR	3	128117444	T	C	rs4857836	RUVBL1	0.716259	0.944733	0.008527	0.928019	0.961747	-6.24281	4.43e-10	9.35336	8.93945	0.627481	0	12	723937	-+--+--+----
W	EUR	3	128117476	G	A	rs4857837	RUVBL1	0.716298	0.944724	0.008527	0.928011	0.961738	-6.24402	4.4e-10	9.35671	9.01092	0.620885	0	12	723937	-+--+--+----
W	EUR	3	128120156	A	G	rs9821568	RUVBL1	0.83422	0.932018	0.010053	0.912315	0.952147	-6.45797	1.1e-10	9.95989	6.44051	0.842417	0	12	723937	-------+----
W	EUR	3	128126858	T	C	rs2811475	RUVBL1	0.834322	0.931455	0.010048	0.911762	0.951574	-6.51269	7.63e-11	10.1173	6.33441	0.850146	0	12	723937	-------+----
W	EUR	3	128134630	A	T	rs4857868	RUVBL1	0.831882	0.931008	0.010446	0.910534	0.951943	-6.30092	3.05e-10	9.51522	5.83639	0.665553	0	9	636410	--?-?--+-?--
W	EUR	3	128135841	A	G	rs2811471	RUVBL1	0.834906	0.931671	0.01006	0.911953	0.951815	-6.48504	9.17e-11	10.0376	6.53618	0.835306	0	12	723937	-------+----
W	EUR	3	128137730	A	T	rs6414310	RUVBL1	0.716708	0.945572	0.008536	0.92884	0.962604	-6.1443	8.27e-10	9.08223	9.38563	0.586344	0	12	723937	-+--+--+----
W	EUR	3	128142979	A	C	rs2955093	RUVBL1	0.151473	1.07495	0.011988	1.05146	1.09897	6.41005	1.5e-10	9.82308	5.88737	0.880772	0	12	723937	+++++++-++++
W	EUR	3	128148554	A	G	rs67451924	RUVBL1	0.267302	1.05697	0.009699	1.03796	1.07632	5.98305	2.25e-09	8.6473	9.52121	0.573897	0	12	723937	+-++-++-++++
W	EUR	3	128148749	G	T	rs73192977	RUVBL1	0.151515	1.07419	0.011978	1.05072	1.0982	6.34775	2.26e-10	9.64672	6.02761	0.871516	0	12	723937	+++++++-++++
W	EUR	3	128150322	A	G	rs4857870	RUVBL1	0.151501	1.07465	0.011985	1.05116	1.09866	6.3846	1.77e-10	9.75084	5.84766	0.883333	0	12	723937	+++++++-++++
W	EUR	3	128152086	G	C	rs10934849	RUVBL1	0.15148	1.07451	0.011982	1.05103	1.09852	6.37396	1.9e-10	9.72072	5.86444	0.882254	0	12	723937	+++++++-++++
W	EUR	3	128153332	G	C	rs11920225	RUVBL1	0.151524	1.0746	0.012167	1.05075	1.09899	6.28338	3.42e-10	9.46624	5.96903	0.817858	0	11	704060	+++++++-+++?
W	EUR	3	128153953	T	C	rs2999046	EEFSEC	0.151433	1.07435	0.011981	1.05087	1.09836	6.36071	2.07e-10	9.68328	6.00851	0.872796	0	12	723937	+++++++-++++
W	EUR	3	128158542	C	T	rs2492284	EEFSEC	0.151411	1.07431	0.011982	1.05083	1.09832	6.35667	2.13e-10	9.67188	5.90585	0.879572	0	12	723937	+++++++-++++
W	EUR	3	128158913	C	A	rs2955114	EEFSEC	0.151399	1.07413	0.01198	1.05065	1.09814	6.34175	2.35e-10	9.62981	5.97081	0.875305	0	12	723937	+++++++-++++
W	EUR	3	128159221	T	C	rs2955115	EEFSEC	0.151512	1.07415	0.011977	1.05068	1.09815	6.34481	2.3e-10	9.63843	5.96703	0.875555	0	12	723937	+++++++-++++
W	EUR	3	128159487	G	A	rs2999047	EEFSEC	0.151258	1.07458	0.011987	1.05108	1.0986	6.37726	1.86e-10	9.73005	5.82238	0.884948	0	12	723937	+++++++-++++
W	EUR	3	128159573	A	G	rs2999048	EEFSEC	0.272704	1.05457	0.009599	1.03575	1.07372	5.78464	7.46e-09	8.12727	9.72277	0.555483	0	12	723937	+-++-+--++++
W	EUR	3	128159974	C	T	rs2999049	EEFSEC	0.26777	1.05614	0.009684	1.03716	1.07547	5.90315	3.67e-09	8.43589	8.67958	0.651441	0	12	723937	+-++-++-++++
W	EUR	3	128160028	G	A	rs2811472	EEFSEC	0.151474	1.07405	0.011977	1.05057	1.09805	6.33577	2.44e-10	9.61299	6.00025	0.873347	0	12	723937	+++++++-++++
W	EUR	3	128162770	A	G	rs2955117	EEFSEC	0.278274	1.05919	0.009759	1.04006	1.07867	6.18458	6.42e-10	9.19259	10.0768	0.433784	0.00761822	11	704060	+-++-++-+++?
W	EUR	3	128163221	A	G	rs2955118	EEFSEC	0.279989	1.05405	0.009667	1.0351	1.07334	5.68805	1.32e-08	7.88012	9.70343	0.466887	0	11	714850	+-?+-+--++++
W	EUR	3	128166094	C	A	rs2811473	EEFSEC	0.15866	1.07032	0.012054	1.0467	1.09448	5.96781	2.47e-09	8.60677	7.56968	0.670789	0	11	704060	++++++--+++?
W	EUR	3	128166165	A	C	rs2687728	EEFSEC	0.153316	1.07638	0.012018	1.05283	1.10047	6.52018	7.26e-11	10.1389	7.23795	0.7795	0	12	723937	+++++++-++++
W	EUR	3	128169224	A	G	rs872267	EEFSEC	0.269284	1.05511	0.009632	1.03623	1.07433	5.82322	5.93e-09	8.22707	9.33998	0.590542	0	12	723937	+-++-+--++++
W	EUR	3	128169504	G	T	rs2955120	EEFSEC	0.26944	1.05549	0.009628	1.03662	1.0747	5.86684	4.56e-09	8.3407	9.24885	0.598934	0	12	723937	+-++-+--++++
W	EUR	3	128169851	T	C	rs2687731	EEFSEC	0.148179	1.0752	0.012077	1.05153	1.0994	6.38388	1.78e-10	9.74881	6.30649	0.852151	0	12	723937	+++++++-++++
W	EUR	3	128170135	T	C	rs2687732	EEFSEC	0.148178	1.07473	0.01207	1.05108	1.09892	6.34639	2.28e-10	9.64289	6.40053	0.845349	0	12	723937	+++++++-++++
W	EUR	3	128170444	G	A	rs3122173	EEFSEC	0.26406	1.05964	0.010132	1.03978	1.07988	6.00171	2.01e-09	8.69707	7.66391	0.568338	0	10	645497	+-++?++-+?++
W	EUR	3	128170532	G	T	rs3122174	EEFSEC	0.148303	1.07449	0.012249	1.05048	1.09904	6.2318	4.75e-10	9.32286	6.56259	0.765992	0	11	704060	+++++++-+++?
W	EUR	3	128171906	G	A	rs2248668	EEFSEC	0.148265	1.07518	0.012073	1.05151	1.09937	6.38385	1.78e-10	9.74872	6.60716	0.829946	0	12	723937	+++++++-++++
W	EUR	3	128172553	G	C	rs2955121	EEFSEC	0.148213	1.07508	0.012073	1.05142	1.09927	6.37552	1.88e-10	9.72515	6.61712	0.829189	0	12	723937	+++++++-++++
W	EUR	3	128173194	C	T	rs2999052	EEFSEC	0.270563	1.05532	0.009944	1.03583	1.07518	5.66193	1.53e-08	7.81398	7.65322	0.569435	0	10	675630	+-+?-++-+++?
W	EUR	3	128174008	C	G	rs2811474	EEFSEC	0.1588	1.07066	0.011962	1.04722	1.09463	6.04405	1.55e-09	8.81055	6.34418	0.785565	0	11	695507	++-?+++-++++
W	EUR	3	128176383	G	A	rs2687729	EEFSEC	0.270661	1.05545	0.009942	1.03597	1.0753	5.67628	1.41e-08	7.85029	7.47174	0.588128	0	10	675630	+-+?-++-+++?
W	EUR	3	128177143	A	G	rs1554535	EEFSEC	0.26951	1.05534	0.009627	1.03648	1.07456	5.85204	4.99e-09	8.30204	8.81441	0.639018	0	12	723937	+-++-+--++++
W	EUR	3	128179658	C	A	rs2811476	EEFSEC	0.261267	1.05745	0.009764	1.03831	1.07694	5.99503	2.09e-09	8.67923	9.40656	0.584419	0	12	723937	+-++-++-++++
W	EUR	3	128179690	A	G	rs2999053	EEFSEC	0.151976	1.07503	0.012147	1.05122	1.09937	6.33133	2.51e-10	9.60052	6.40898	0.779813	0	11	695507	+++?+++-++++
W	EUR	3	128181143	A	G	rs2999054	EEFSEC	0.148086	1.07517	0.012077	1.0515	1.09937	6.38155	1.81e-10	9.74221	6.57003	0.832759	0	12	723937	+++++++-++++
W	EUR	3	128181651	G	A	rs2999060	EEFSEC	0.152065	1.07464	0.01214	1.05085	1.09898	6.30164	3.04e-10	9.51725	6.5808	0.764338	0	11	695507	++-?+++-++++
W	EUR	3	128181679	T	G	rs2999055	EEFSEC	0.148164	1.07473	0.01207	1.05107	1.09892	6.34664	2.27e-10	9.64358	6.56954	0.832796	0	12	723937	++-++++-++++
W	EUR	3	128182943	A	G	rs2811479	EEFSEC	0.26439	1.05799	0.009731	1.03892	1.07742	6.07402	1.28e-09	8.89133	8.76155	0.643891	0	12	723937	+-++-++-++++
W	EUR	3	128183248	T	G	rs2811480	EEFSEC	0.263848	1.0572	0.009724	1.03814	1.07661	5.99202	2.13e-09	8.6712	8.57143	0.661384	0	12	723937	+-++-++-++++
W	EUR	3	128184679	A	G	rs2999056	EEFSEC	0.148202	1.07472	0.012069	1.05107	1.09891	6.34595	2.28e-10	9.64166	6.58467	0.831652	0	12	723937	++-++++-++++
W	EUR	3	128184835	C	T	rs2955123	EEFSEC	0.148019	1.07539	0.012082	1.05171	1.0996	6.39744	1.63e-10	9.78727	6.29006	0.853327	0	12	723937	+++++++-++++
W	EUR	3	128185347	C	T	rs2811517	EEFSEC	0.148198	1.07472	0.01207	1.05107	1.09891	6.34604	2.28e-10	9.6419	6.55774	0.833685	0	12	723937	++-++++-++++
W	EUR	3	128185653	C	T	rs2811481	EEFSEC	0.263845	1.05677	0.009721	1.03771	1.07617	5.94792	2.79e-09	8.55401	8.43099	0.674255	0	12	723937	+-+++++-++++
W	EUR	3	128186100	T	C	rs2811482	EEFSEC	0.269286	1.05534	0.009629	1.03647	1.07456	5.8502	5.04e-09	8.29727	9.19031	0.604331	0	12	723937	+-++-+--++++
W	EUR	3	128186608	G	A	rs2811516	EEFSEC	0.264348	1.05689	0.009714	1.03785	1.07628	5.96613	2.5e-09	8.6023	8.15722	0.699155	0	12	723937	+-++-++-++++
W	EUR	3	128186675	A	G	rs2811515	EEFSEC	0.263848	1.05722	0.009723	1.03816	1.07662	5.99547	2.09e-09	8.68042	8.48454	0.669353	0	12	723937	+-++-++-++++
W	EUR	3	128186805	T	A	rs2999059	EEFSEC	0.14814	1.07627	0.012079	1.0526	1.10048	6.47689	9.68e-11	10.0142	6.32656	0.850711	0	12	723937	++-++++-++++
W	EUR	3	128189086	G	A	rs2811514	EEFSEC	0.269448	1.05609	0.009633	1.0372	1.07531	5.9287	3.14e-09	8.50319	9.73056	0.554774	0	12	723937	+-++-+--++++
W	EUR	3	128190721	A	G	rs2811513	EEFSEC	0.2639	1.05729	0.009724	1.03823	1.0767	6.0025	2e-09	8.69917	9.01241	0.620747	0	12	723937	+-++-++-++++
W	EUR	3	128190915	T	C	rs2999057	EEFSEC	0.148121	1.07573	0.012083	1.05204	1.09994	6.42719	1.34e-10	9.8719	6.6414	0.827336	0	12	723937	++-++++-++++
W	EUR	3	128192977	A	G	rs2811512	EEFSEC	0.26942	1.05601	0.009633	1.03713	1.07523	5.92029	3.3e-09	8.481	9.89766	0.539616	0	12	723937	+-++-+--++++
W	EUR	3	128194420	G	A	rs883238	EEFSEC	0.269496	1.05578	0.009632	1.0369	1.075	5.89645	3.82e-09	8.41828	9.18033	0.605251	0	12	723937	+-++-+--++++
W	EUR	3	128194871	G	A	rs940061	EEFSEC	0.148043	1.07592	0.012086	1.05223	1.10014	6.44243	1.21e-10	9.91543	6.5704	0.832731	0	12	723937	+++++++-++++
W	EUR	3	128194985	A	T	rs940062	EEFSEC	0.148519	1.07627	0.012072	1.05261	1.10046	6.48046	9.45e-11	10.0244	6.35741	0.848485	0	12	723937	+++++++-++++
W	EUR	3	128195669	G	A	rs2811510	EEFSEC	0.14802	1.07579	0.012086	1.0521	1.10001	6.43067	1.31e-10	9.88184	6.49044	0.838722	0	12	723937	+++++++-++++
W	EUR	3	128195830	C	G	rs2811483	EEFSEC	0.14789	1.07625	0.012084	1.05257	1.10047	6.47268	9.95e-11	10.0021	6.25392	0.855896	0	12	723937	+++++++-++++
W	EUR	3	128196010	A	G	rs2811484	EEFSEC	0.148068	1.07617	0.012262	1.05214	1.10075	6.37077	1.94e-10	9.71171	6.21342	0.797025	0	11	704060	+++++++-+++?
W	EUR	3	128197647	T	C	rs2955124	EEFSEC	0.148019	1.07608	0.012089	1.05239	1.10031	6.45512	1.12e-10	9.95173	6.39325	0.845881	0	12	723937	+++++++-++++
W	EUR	3	128197708	A	G	rs2811509	EEFSEC	0.263902	1.05756	0.009716	1.03852	1.07695	6.03638	1.62e-09	8.78994	9.11114	0.611634	0	12	723937	+-++-++-++++
W	EUR	3	128199157	A	G	rs2492285	EEFSEC	0.263876	1.05705	0.009723	1.038	1.07646	5.9774	2.33e-09	8.63227	8.62424	0.656532	0	12	723937	+-++-++-++++
W	EUR	3	128200112	T	C	rs2687720	EEFSEC	0.269464	1.05534	0.009628	1.03647	1.07455	5.85088	5.02e-09	8.29902	9.01926	0.620115	0	12	723937	+-++-+--++++
W	EUR	3	128200202	A	T	rs2687733	EEFSEC	0.26899	1.05822	0.01004	1.03854	1.07827	5.90884	3.54e-09	8.45085	8.05924	0.528187	0	10	645497	+-++?+--+?++
W	EUR	3	128200203	T	G	rs2811485	EEFSEC	0.268875	1.05835	0.0101	1.03855	1.07852	5.88633	4.06e-09	8.39171	8.01516	0.43199	0.00189204	9	636410	+-?+?+--+?++
W	EUR	3	128200574	T	C	rs2140286	EEFSEC	0.147864	1.07608	0.012084	1.05239	1.1003	6.4571	1.1e-10	9.9574	6.11678	0.865459	0	12	723937	+++++++-++++
W	EUR	3	128201180	C	T	rs2811508	EEFSEC	0.263985	1.05679	0.009718	1.03774	1.07618	5.95182	2.73e-09	8.56433	8.0155	0.711914	0	12	723937	+-++-++-++++
W	EUR	3	128204344	C	T	rs6439119	EEFSEC	0.720363	0.945728	0.008549	0.928971	0.962787	-6.1179	9.77e-10	9.01027	8.36575	0.680214	0	12	723937	-+--+--+----
W	EUR	3	128204967	A	G	rs2999058	EEFSEC	0.147902	1.07556	0.012078	1.05189	1.09977	6.41475	1.46e-10	9.83647	6.19128	0.860302	0	12	723937	+++++++-++++
W	EUR	3	128206349	G	A	rs2955125	EEFSEC	0.147828	1.07627	0.012086	1.05258	1.10049	6.4732	9.92e-11	10.0036	6.08855	0.867391	0	12	723937	+++++++-++++
W	EUR	3	128207673	G	A	rs2955127	EEFSEC	0.148097	1.07567	0.012084	1.05199	1.09989	6.42171	1.39e-10	9.8563	6.52115	0.836432	0	12	723937	++-++++-++++
W	EUR	3	128209434	T	C	rs2955128	EEFSEC	0.148032	1.0754	0.012082	1.05172	1.09962	6.39897	1.62e-10	9.79161	6.39363	0.845852	0	12	723937	++-++++-++++
W	EUR	3	128211616	G	A	rs9838120	EEFSEC	0.720369	0.945769	0.00855	0.92901	0.962829	-6.1128	1.01e-09	8.99641	8.21239	0.694162	0	12	723937	-+--+--+----
W	EUR	3	128212023	A	C	rs7374072	EEFSEC	0.720421	0.945239	0.008545	0.928491	0.962289	-6.17455	6.84e-10	9.16504	8.7381	0.646052	0	12	723937	-+--+--+----
W	EUR	3	128212559	G	A	rs7372439	EEFSEC	0.720561	0.946121	0.008683	0.929102	0.963452	-5.98018	2.29e-09	8.63968	8.02065	0.62682	0	11	704060	-+-----+---?
W	EUR	3	128214360	C	G	rs11707297	EEFSEC	0.714762	0.946374	0.00849	0.929734	0.963312	-6.08998	1.16e-09	8.93449	10.1825	0.51405	0	12	723937	-+--+-++----
W	EUR	3	128214943	T	C	rs4857871	EEFSEC	0.720338	0.945163	0.008544	0.928417	0.962212	-6.18336	6.47e-10	9.18924	8.95233	0.626292	0	12	723937	-+--+--+----
W	EUR	3	128214979	G	T	rs4857872	EEFSEC	0.720364	0.945224	0.008544	0.928477	0.962274	-6.17643	6.76e-10	9.1702	8.92307	0.628994	0	12	723937	-+--+--+----
W	EUR	3	128215375	G	A	rs4857873	EEFSEC	0.720403	0.945145	0.008544	0.928398	0.962194	-6.18527	6.39e-10	9.19449	8.76804	0.643294	0	12	723937	-+--+--+----
W	EUR	3	128215426	T	A	rs4857874	EEFSEC	0.720344	0.945127	0.008543	0.928382	0.962173	-6.18806	6.28e-10	9.20218	8.77322	0.642816	0	12	723937	-+--+--+----
W	EUR	3	128215433	T	C	rs4857875	EEFSEC	0.720322	0.945261	0.008544	0.928514	0.96231	-6.17246	6.93e-10	9.15933	9.00322	0.621596	0	12	723937	-+--+--+----
W	EUR	3	128215486	C	T	rs6770140	EEFSEC	0.720533	0.945075	0.008544	0.928329	0.962122	-6.19334	6.07e-10	9.2167	8.74235	0.645661	0	12	723937	-+--+--+----
W	EUR	3	128215931	A	C	rs4384971	EEFSEC	0.720401	0.945368	0.008547	0.928616	0.962422	-6.15896	7.55e-10	9.12231	8.83217	0.637381	0	12	723937	-+--+--+----
W	EUR	3	128216618	C	G	rs6439121	EEFSEC	0.720428	0.944975	0.008543	0.928231	0.96202	-6.20507	5.64e-10	9.24901	8.68931	0.650546	0	12	723937	-+--+--+----
W	EUR	3	128217684	T	C	rs9879865	EEFSEC	0.720372	0.945266	0.00855	0.928508	0.962326	-6.16782	7.14e-10	9.14659	8.74286	0.645614	0	12	723937	-+--+--+----
W	EUR	3	128217689	T	C	rs9879866	EEFSEC	0.720366	0.945296	0.00855	0.928537	0.962356	-6.1645	7.29e-10	9.13749	8.74323	0.64558	0	12	723937	-+--+--+----
W	EUR	3	128218483	C	A	rs2254379	EEFSEC	0.147875	1.07603	0.012084	1.05235	1.10025	6.45307	1.13e-10	9.94585	6.01177	0.872578	0	12	723937	+++++++-++++
W	EUR	3	128218802	G	A	rs9847576	EEFSEC	0.720325	0.945059	0.008543	0.928314	0.962106	-6.19537	5.99e-10	9.22228	8.90625	0.630546	0	12	723937	-+--+--+----
W	EUR	3	128219294	A	G	rs9814834	EEFSEC	0.720346	0.945025	0.008543	0.928282	0.96207	-6.19968	5.83e-10	9.23415	8.85176	0.635573	0	12	723937	-+--+--+----
W	EUR	3	128220191	T	A	rs9857235	EEFSEC	0.720389	0.944946	0.008542	0.928203	0.961991	-6.20839	5.52e-10	9.25817	8.89424	0.631654	0	12	723937	-+--+--+----
W	EUR	3	128220514	A	T	rs4323023	EEFSEC	0.72037	0.944951	0.008542	0.928208	0.961995	-6.20803	5.53e-10	9.25716	8.98885	0.622922	0	12	723937	-+--+--+----
W	EUR	3	128220601	A	G	rs2955131	EEFSEC	0.147983	1.07649	0.012085	1.0528	1.10071	6.49286	8.71e-11	10.0601	5.93452	0.877697	0	12	723937	+++++++-++++
W	EUR	3	128221383	C	A	rs2955132	EEFSEC	0.147907	1.07558	0.012084	1.0519	1.0998	6.41357	1.47e-10	9.83311	6.03301	0.871153	0	12	723937	+++++++-++++
W	EUR	3	128221510	G	T	rs9845651	EEFSEC	0.720407	0.945307	0.008546	0.928557	0.962359	-6.16646	7.2e-10	9.14287	8.67508	0.651855	0	12	723937	-+-----+----
W	EUR	3	128221597	C	G	rs7372902	EEFSEC	0.720392	0.945268	0.008545	0.928519	0.962319	-6.17108	6.99e-10	9.15553	8.77239	0.642892	0	12	723937	-+-----+----
W	EUR	3	128221691	G	A	rs6439122	EEFSEC	0.720386	0.94531	0.008546	0.92856	0.962362	-6.166	7.22e-10	9.1416	8.72286	0.647457	0	12	723937	-+-----+----
W	EUR	3	128222229	T	C	rs55775237	EEFSEC	0.148039	1.07579	0.012078	1.05212	1.1	6.43523	1.27e-10	9.89486	5.86657	0.882117	0	12	723937	+++++++-++++
W	EUR	3	128222596	C	T	rs6439123	EEFSEC	0.720481	0.945382	0.008548	0.928627	0.962439	-6.15637	7.67e-10	9.11524	8.82681	0.637875	0	12	723937	-+--+--+----
W	EUR	3	128223104	G	A	rs2999088	EEFSEC	0.147965	1.07591	0.01208	1.05223	1.10012	6.44458	1.2e-10	9.92157	6.0914	0.867196	0	12	723937	+++++++-++++
W	EUR	3	128223536	G	A	rs9873786	EEFSEC	0.714801	0.94668	0.008493	0.930033	0.963625	-6.05367	1.46e-09	8.83643	9.88014	0.5412	0	12	723937	-+--+-++----
W	EUR	3	128224485	G	A	rs4857838	EEFSEC	0.720363	0.945458	0.008547	0.928706	0.962511	-6.14932	8.02e-10	9.09595	8.45131	0.672396	0	12	723937	-+--+--+----
W	EUR	3	128225634	G	C	rs6775988	EEFSEC	0.720469	0.945353	0.008548	0.9286	0.962409	-6.16009	7.49e-10	9.12542	8.64946	0.654213	0	12	723937	-+--+--+----
W	EUR	3	128226506	A	G	rs6777054	EEFSEC	0.720363	0.94496	0.008543	0.928216	0.962006	-6.20657	5.58e-10	9.25315	8.87828	0.633126	0	12	723937	-+--+--+----
W	EUR	3	128227945	A	G	rs9830294	EEFSEC	0.714761	0.946763	0.008494	0.930114	0.96371	-6.04373	1.55e-09	8.80968	9.75017	0.55299	0	12	723937	-+--+-++----
W	EUR	3	128228189	C	T	rs2955134	EEFSEC	0.148111	1.07483	0.012075	1.05116	1.09903	6.35232	2.19e-10	9.65961	6.31252	0.85172	0	12	723937	++-++++-++++
W	EUR	3	128229217	G	A	rs4857877	EEFSEC	0.720578	0.946116	0.008556	0.929346	0.963188	-6.07049	1.31e-09	8.88179	8.95503	0.626043	0	12	723937	-+--+--+----
W	EUR	3	128229306	C	T	rs4857878	EEFSEC	0.722257	0.944778	0.008575	0.927972	0.961888	-6.20319	5.7e-10	9.24381	8.9944	0.622409	0	12	723937	-+--+--+----
W	EUR	3	128239170	A	G	rs4074440	EEFSEC	0.722599	0.948609	0.008731	0.931496	0.966036	-5.68037	1.38e-08	7.86065	8.89348	0.542242	0	11	695507	-+-?+-++----
W	EUR	3	128242553	T	A	rs9843281	EEFSEC	0.714835	0.9472	0.008498	0.930543	0.964155	-5.99261	2.12e-09	8.67278	9.61832	0.565011	0	12	723937	-+--+-++----
W	EUR	3	128244605	G	A	rs13434079	EEFSEC	0.714805	0.947142	0.008499	0.930484	0.964097	-5.99894	2.04e-09	8.68966	9.93182	0.53653	0	12	723937	-+--+-++----
W	EUR	3	128259952	A	G	rs4555544	EEFSEC	0.716537	0.946226	0.008501	0.929564	0.963186	-6.09815	1.1e-09	8.95664	9.1022	0.61246	0	12	723937	-+--+-++----
W	EUR	3	128264366	T	C	rs2999035	EEFSEC	0.147812	1.0748	0.012088	1.05111	1.09903	6.34284	2.33e-10	9.63289	6.46164	0.840858	0	12	723937	+++++++-++++
W	EUR	3	128269397	G	C	rs2999064	EEFSEC	0.147936	1.07433	0.01208	1.05066	1.09854	6.30632	2.95e-10	9.53035	6.77542	0.816968	0	12	723937	++-++++-++++
W	EUR	3	128272306	A	C	rs2811413	EEFSEC	0.672344	0.946802	0.008331	0.930474	0.963417	-6.15909	7.54e-10	9.12268	11.5352	0.317368	0.133087	11	704060	--+-+-++---?
W	EUR	3	128275317	A	G	rs2811529	EEFSEC	0.716549	0.946566	0.008635	0.929642	0.963799	-5.96583	2.5e-09	8.60151	9.47697	0.487513	0	11	704060	-+--+-++---?
W	EUR	3	128317943	T	C	rs13095166	EEFSEC	0.153895	1.07146	0.011877	1.04818	1.09526	6.15862	7.56e-10	9.1214	3.90868	0.972512	0	12	723937	+++++++-++++
W	EUR	3	128319530	A	C	rs10934853	EEFSEC	0.27228	1.05319	0.009731	1.03411	1.07261	5.55739	2.8e-08	7.55208	5.73018	0.8374	0	11	704060	+-++-++-+++?
W	EUR	3	128319846	A	C	rs12486127	EEFSEC	0.153788	1.07175	0.011883	1.04846	1.09556	6.18119	6.56e-10	9.18327	3.90327	0.972662	0	12	723937	+++++++-++++
W	EUR	3	128319991	T	C	rs12486156	EEFSEC	0.153918	1.07322	0.012079	1.04955	1.09743	6.20917	5.49e-10	9.26032	3.35388	0.971828	0	11	704060	+++++++-+++?
W	EUR	3	128327800	A	G	rs4857841	EEFSEC	0.278712	1.05202	0.00966	1.03309	1.0713	5.47359	4.51e-08	7.34549	5.88856	0.824538	0	11	695507	+-+?-++-++++
W	EUR	3	128339774	T	A	rs3849531	EEFSEC	0.272448	1.05211	0.009579	1.03333	1.07122	5.52933	3.29e-08	7.48256	5.54071	0.902188	0	12	723937	+-++-++-++++
W	EUR	3	128340767	A	G	rs1735558	EEFSEC	0.15377	1.07251	0.011892	1.0492	1.09633	6.24435	4.39e-10	9.35764	3.80565	0.975261	0	12	723937	+++++++-++++
W	EUR	3	128345275	C	A	rs4857879	EEFSEC	0.163201	1.06689	0.011687	1.04398	1.0903	5.84655	5.16e-09	8.28774	4.5496	0.919168	0	11	695507	+++?+++-++++
W	EUR	3	128365321	T	A	rs4277707	EEFSEC	0.135815	1.0714	0.012641	1.04662	1.09676	5.77744	7.79e-09	8.10871	6.83374	0.812383	0	12	723937	++-+-++-++++
W	EUR	3	128376435	G	T	rs1702118	EEFSEC	0.138185	1.07232	0.012494	1.04784	1.09738	5.92464	3.22e-09	8.49248	7.24408	0.778987	0	12	723937	++-+-++-++++
W	EUR	3	128387129	A	G	rs2999033	EEFSEC	0.124967	1.07259	0.013277	1.04656	1.09926	5.59169	2.3e-08	7.63751	7.76755	0.65153	0	11	704060	++-+-++-+++?
W	EUR	3	128396538	G	A	rs1735527	EEFSEC	0.124323	1.07057	0.013101	1.04489	1.09688	5.50518	3.78e-08	7.423	8.01769	0.711719	0	12	723937	++-+-++-++++
W	EUR	3	190813732	T	G	rs12636955	LOC100131685	0.302035	0.950915	0.008568	0.934122	0.968011	-5.53638	3.16e-08	7.5	12.9173	0.228332	0.225845	11	704060	-----------?
W	EUR	3	190813782	A	G	rs34216141	LOC100131685	0.302013	0.951148	0.008571	0.934349	0.968248	-5.50906	3.69e-08	7.43256	13.0087	0.223188	0.231281	11	704060	-----------?
W	EUR	3	190838215	C	G	rs9837216	LOC100131685/GMNC	0.314071	0.951736	0.008371	0.935329	0.96843	-5.57588	2.52e-08	7.59806	14.6649	0.198359	0.249908	12	723937	-----------+
W	EUR	3	190840609	G	C	rs9848443	LOC100131685/GMNC	0.314628	0.9517	0.00837	0.935295	0.968394	-5.5801	2.46e-08	7.60857	15.065	0.179539	0.269832	12	723937	-----------+
W	EUR	3	190850149	T	C	rs9872656	GMNC	0.31094	0.950515	0.008524	0.933809	0.96752	-5.6097	2.08e-08	7.68255	8.26494	0.602975	0	11	704060	-----------?
W	EUR	3	190856564	T	G	rs9830307	GMNC	0.319655	0.951399	0.008505	0.934728	0.968367	-5.52403	3.39e-08	7.46948	8.85604	0.545818	0	11	704060	-----------?
W	EUR	4	55123508	A	T	rs1380057	KDR	0.49831	1.04976	0.008807	1.0325	1.06731	5.74061	9.68e-09	8.01411	14.8293	0.13841	0.32566	11	714850	++?++++-++++
W	EUR	4	55124787	C	G	rs73236104	KDR	0.243406	0.910234	0.008881	0.892827	0.927981	-9.547	1.42e-21	20.8469	29.3205	0.002024	0.624836	12	723937	--------+---
W	EUR	4	55125564	C	T	rs7667298	KDR	0.543508	1.05249	0.009036	1.03478	1.0705	5.90806	3.56e-09	8.4488	18.2416	0.032472	0.506621	10	675630	+++?++--+++?
W	EUR	4	55125660	G	A	rs9994560	KDR	0.483882	0.950422	0.007994	0.934753	0.966354	-5.99525	2.09e-09	8.67982	19.3639	0.035877	0.483575	11	704060	-------++--?
W	EUR	4	55125858	A	G	rs41408948	KDR	0.244315	0.911392	0.00887	0.894006	0.929116	-9.44198	3.89e-21	20.4096	31.5404	0.000904	0.651241	12	723937	--------+---
W	EUR	4	55125938	C	G	rs28695311	KDR	0.484083	0.952015	0.007883	0.936563	0.967721	-5.89022	3.96e-09	8.40193	19.9058	0.046649	0.447398	12	723937	-------++---
W	EUR	4	55125972	T	C	rs2239702	KDR	0.243884	0.909247	0.008999	0.89161	0.927233	-9.51958	1.85e-21	20.7323	28.5892	0.001452	0.650217	11	704060	--------+--?
W	EUR	4	55126199	G	A	rs2071559	KDR	0.494855	0.950444	0.008106	0.934557	0.966602	-5.90954	3.53e-09	8.45269	19.439	0.021708	0.537014	10	675630	---?---++--?
W	EUR	4	55127301	C	T	rs28517654	KDR	0.266142	0.907651	0.008605	0.890785	0.924836	-10.1254	4.56e-24	23.3407	37.0488	0.000113	0.703094	12	723937	------+-----
W	EUR	4	55127748	T	C	rs1551641	KDR	0.304193	0.913772	0.00833	0.897446	0.930396	-9.8033	1.16e-22	21.9341	36.4014	0.000145	0.697814	12	723937	------------
W	EUR	4	55128043	C	T	rs1551642	KDR	0.304443	0.91371	0.008329	0.897385	0.930332	-9.81088	1.08e-22	21.9667	36.402	0.000145	0.697819	12	723937	------------
W	EUR	4	55128059	A	T	rs1551643	KDR	0.304176	0.913735	0.008329	0.897409	0.930357	-9.80817	1.11e-22	21.955	36.4738	0.000141	0.698414	12	723937	------------
W	EUR	4	55128099	T	A	rs1551644	KDR	0.30418	0.913703	0.008329	0.897378	0.930325	-9.81177	1.07e-22	21.9705	36.4243	0.000144	0.698004	12	723937	------------
W	EUR	4	55128147	G	T	rs1551645	KDR	0.305596	0.91447	0.008309	0.898184	0.931052	-9.75201	1.93e-22	21.7143	34.5083	0.000299	0.681236	12	723937	------------
W	EUR	4	55128894	T	C	rs9992737	KDR	0.266064	0.907717	0.008603	0.890854	0.924899	-10.1202	4.81e-24	23.3174	37.6375	9.01e-05	0.707738	12	723937	------+-----
W	EUR	4	55129261	T	C	rs201032940	KDR	0.244434	0.908066	0.009199	0.890035	0.926462	-9.42448	4.6e-21	20.3372	28.3301	0.00084	0.682317	10	645497	----?----?--
W	EUR	4	55129402	A	C	rs36173205	KDR	0.2656	0.905936	0.009012	0.888272	0.923951	-9.83326	8.65e-23	22.063	33.5593	4.88e-05	0.761616	9	636410	--?-?-+--?--
W	EUR	4	55129480	G	T	rs36190491	KDR	0.24437	0.907161	0.009188	0.889154	0.925534	-9.52474	1.76e-21	20.7538	27.6674	0.001084	0.674707	10	645497	----?----?--
W	EUR	4	55129812	C	T	rs36146043	KDR	0.304161	0.913547	0.008326	0.897228	0.930163	-9.83213	8.75e-23	22.0581	36.4168	0.000144	0.697942	12	723937	------------
W	EUR	4	55130545	T	C	rs73236106	KDR	0.266113	0.907695	0.008604	0.890831	0.924879	-10.1215	4.75e-24	23.3233	37.7335	8.68e-05	0.708482	12	723937	------+-----
W	EUR	4	55130678	T	C	rs9998950	KDR	0.24439	0.910337	0.008846	0.892999	0.928012	-9.57485	1.09e-21	20.9637	29.3534	0.002	0.625257	12	723937	------------
W	EUR	4	55130736	A	G	rs10020668	KDR	0.266067	0.907537	0.008602	0.890678	0.924716	-10.1408	3.9e-24	23.4086	37.6827	8.85e-05	0.708089	12	723937	------+-----
W	EUR	4	55131034	G	A	rs10013070	KDR	0.244403	0.910491	0.008847	0.893151	0.928168	-9.55827	1.28e-21	20.8941	29.1129	0.00218	0.622161	12	723937	------------
W	EUR	4	55131173	G	A	rs10013228	KDR	0.272644	0.90751	0.008676	0.890505	0.924839	-10.0562	9.23e-24	23.0346	37.1472	5.34e-05	0.7308	11	695507	---?--+-----
W	EUR	4	55131455	T	C	rs28584303	KDR	0.266062	0.907689	0.008601	0.890831	0.924866	-10.1261	4.53e-24	23.3437	37.3747	9.97e-05	0.705683	12	723937	------+-----
W	EUR	4	55131747	C	T	rs12331597	KDR	0.304016	0.914445	0.008334	0.89811	0.931077	-9.72533	2.51e-22	21.6004	36.4903	0.00014	0.69855	12	723937	------------
W	EUR	4	55131919	C	A	rs12331538	KDR	0.266123	0.907842	0.008602	0.890983	0.92502	-10.1095	5.37e-24	23.2698	37.5679	9.25e-05	0.707197	12	723937	------+-----
W	EUR	4	55131969	A	G	rs10026340	KDR	0.244414	0.910745	0.008847	0.893405	0.928421	-9.53281	1.63e-21	20.7875	29.1722	0.002134	0.622929	12	723937	------------
W	EUR	4	55133018	A	G	rs17711225	KDR	0.248514	0.911083	0.008811	0.893813	0.928686	-9.53723	1.56e-21	20.806	29.317	0.002026	0.624791	12	723937	------------
W	EUR	4	55133614	C	T	rs17773240	KDR	0.269916	0.907814	0.008557	0.891042	0.924902	-10.1652	3.04e-24	23.5175	37.5558	9.3e-05	0.707102	12	723937	------+-----
W	EUR	4	55133842	T	A	rs28411232	KDR	0.269764	0.908083	0.008569	0.891287	0.925195	-10.1228	4.69e-24	23.3291	37.9926	7.85e-05	0.71047	12	723937	------+-----
W	EUR	4	55133886	C	A	rs17711320	KDR	0.269797	0.907848	0.008567	0.891057	0.924955	-10.1503	3.54e-24	23.4508	37.8666	8.24e-05	0.709507	12	723937	------+-----
W	EUR	4	55135342	C	T	rs12331471	KDR	0.269608	0.907651	0.008561	0.890872	0.924747	-10.1775	2.68e-24	23.5721	36.9762	0.000116	0.702512	12	723937	------+-----
W	EUR	4	55136100	A	T	rs10517343	KDR	0.269776	0.907752	0.00856	0.890975	0.924845	-10.1687	2.93e-24	23.5329	36.4996	0.00014	0.698627	12	723937	------+-----
W	EUR	4	55136498	C	T	rs9312655	KDR	0.269633	0.907708	0.008561	0.890928	0.924803	-10.1721	2.83e-24	23.5479	36.7812	0.000125	0.700935	12	723937	------+-----
W	EUR	4	55136522	T	A	rs10012589	KDR	0.269663	0.907664	0.00856	0.890887	0.924757	-10.178	2.67e-24	23.5741	36.6535	0.000132	0.699892	12	723937	------+-----
W	EUR	4	55136609	G	A	rs10012701	KDR	0.269659	0.907946	0.008562	0.891164	0.925044	-10.1454	3.72e-24	23.4293	36.8361	0.000123	0.70138	12	723937	------+-----
W	EUR	4	55136615	C	G	rs1380069	KDR	0.521309	1.04773	0.008658	1.03076	1.06498	5.5967	2.24e-08	7.65001	16.1343	0.136218	0.318223	12	723937	++++++-+++++
W	EUR	4	55136805	G	C	rs9312656	KDR	0.269732	0.907645	0.008559	0.890868	0.924737	-10.1802	2.6e-24	23.5843	36.9753	0.000116	0.702504	12	723937	------+-----
W	EUR	4	55136950	T	C	rs9284955	KDR	0.248468	0.910425	0.008797	0.893183	0.928	-9.61992	7.03e-22	21.1533	28.0808	0.003146	0.608273	12	723937	------------
W	EUR	4	55137335	A	G	rs9312657	KDR	0.269682	0.907866	0.008562	0.891085	0.924964	-10.1543	3.4e-24	23.4687	36.7678	0.000126	0.700826	12	723937	------+-----
W	EUR	4	55137540	G	C	rs1380068	KDR	0.248455	0.910686	0.0088	0.893439	0.928266	-9.59044	9.35e-22	21.0292	28.1271	0.003095	0.608918	12	723937	------------
W	EUR	4	55138287	T	C	rs1350545	KDR	0.248421	0.910717	0.008801	0.893468	0.928299	-9.58616	9.75e-22	21.0112	28.1384	0.003083	0.609075	12	723937	------------
W	EUR	4	55139359	A	C	rs9312658	KDR	0.309949	0.914108	0.008325	0.89779	0.930722	-9.77243	1.58e-22	21.8017	36.2696	0.000153	0.696716	12	723937	------------
W	EUR	4	55139935	A	C	rs12505096	KDR	0.285459	0.916176	0.008494	0.899528	0.933132	-9.35727	8.7e-21	20.0603	29.1103	0.002182	0.622127	12	723937	------------
W	EUR	4	55140926	A	G	rs12498317	KDR	0.285864	0.916144	0.008489	0.899505	0.933092	-9.36524	8.07e-21	20.093	29.1521	0.00215	0.622669	12	723937	------------
W	EUR	4	55141082	G	A	rs28838369	KDR	0.285914	0.916225	0.008491	0.899582	0.933176	-9.35466	8.92e-21	20.0496	29.1607	0.002143	0.62278	12	723937	------------
W	EUR	4	55141258	T	C	rs73236109	KDR	0.306948	0.91339	0.008304	0.897114	0.929961	-9.87553	5.68e-23	22.2456	35.5564	0.000201	0.690633	12	723937	------------
W	EUR	4	55142310	G	A	rs1903068	KDR	0.306935	0.910947	0.008417	0.894449	0.927749	-10.0025	1.59e-23	22.7987	34.2234	0.000169	0.707802	11	704060	-----------?
W	EUR	4	55142802	A	G	rs17773813	KDR	0.306872	0.913057	0.008303	0.896783	0.929625	-9.91311	3.9e-23	22.4085	35.578	0.000199	0.69082	12	723937	------------
W	EUR	4	55143078	C	T	rs28680424	KDR	0.285586	0.915903	0.00849	0.899264	0.932851	-9.39064	6.35e-21	20.1975	29.264	0.002065	0.624111	12	723937	------------
W	EUR	4	55143998	G	A	rs4516787	KDR	0.307181	0.91306	0.0083	0.896792	0.929623	-9.91611	3.79e-23	22.4215	36.1979	0.000157	0.696115	12	723937	------------
W	EUR	4	55145722	T	C	rs12331507	KDR	0.325959	0.921832	0.008329	0.905508	0.938451	-8.92844	4.58e-19	18.3394	26.9293	0.002672	0.628658	11	695507	---?--------
W	EUR	4	55148222	C	G	rs1350543	KDR	0.482584	1.04891	0.008657	1.03195	1.06616	5.73939	9.75e-09	8.011	16.421	0.126207	0.330126	12	723937	++++++-+++++
W	EUR	4	55148226	T	C	rs1350542	KDR	0.494868	1.05501	0.00872	1.03792	1.07238	6.426	1.35e-10	9.86851	20.5877	0.037903	0.465701	12	723937	+++++++-++++
W	EUR	4	55148258	T	C	rs2219469	KDR	0.505332	1.05595	0.008861	1.03859	1.07361	6.43492	1.28e-10	9.89396	20.3889	0.025782	0.509537	11	695507	+++?+++-++++
W	EUR	4	55149673	T	C	rs6837695	KDR	0.481194	0.947908	0.007834	0.932553	0.963516	-6.4204	1.4e-10	9.85255	21.0643	0.032711	0.47779	12	723937	-------+----
W	EUR	4	55149674	A	G	rs4864956	KDR	0.495252	1.05528	0.008719	1.03819	1.07265	6.45887	1.09e-10	9.96245	20.7264	0.036319	0.469276	12	723937	++++++++++++
W	EUR	4	55149904	A	G	rs1458829	KDR	0.495696	1.05493	0.008716	1.03784	1.07229	6.41926	1.41e-10	9.84932	21.0154	0.033212	0.476575	12	723937	+++++++-++++
W	EUR	4	55150554	G	C	rs7686613	KDR	0.495645	1.05499	0.008717	1.0379	1.07235	6.42555	1.36e-10	9.86722	20.7984	0.03552	0.471114	12	723937	++++++++++++
W	EUR	4	55151107	T	C	rs1580217	KDR	0.495419	1.05506	0.008718	1.03797	1.07242	6.43364	1.29e-10	9.89032	21.0298	0.033063	0.476933	12	723937	++++++++++++
W	EUR	4	55151116	T	C	rs1580216	KDR	0.495723	1.05486	0.008716	1.03778	1.07222	6.41122	1.49e-10	9.82641	21.3059	0.030337	0.483711	12	723937	+++++++-++++
W	EUR	4	55151800	A	G	rs13143757	KDR	0.495874	1.05492	0.008718	1.03784	1.07229	6.41741	1.43e-10	9.84405	21.1694	0.031657	0.480383	12	723937	+++++++-++++
W	EUR	4	55151878	G	A	rs13120613	KDR	0.503193	1.05534	0.009156	1.03739	1.0736	6.15506	7.73e-10	9.11164	24.0735	0.002228	0.667684	9	636410	++?-?++++?++
W	EUR	4	55152901	C	A	rs73236111	KDR	0.285837	0.916633	0.008503	0.899966	0.933608	-9.29782	1.52e-20	19.817	30.1769	0.001486	0.635483	12	723937	------------
W	EUR	4	55152972	T	A	rs11935409	KDR	0.495769	1.05495	0.008717	1.03787	1.07232	6.42144	1.39e-10	9.85552	20.89	0.034529	0.473432	12	723937	+++++++-++++
W	EUR	4	55153086	C	T	rs11936364	KDR	0.495786	1.05487	0.008718	1.03778	1.07224	6.41118	1.49e-10	9.8263	20.9989	0.033382	0.476164	12	723937	+++++++-++++
W	EUR	4	55154772	G	A	rs2125493	KDR	0.483338	1.04851	0.008654	1.03155	1.06576	5.6932	1.28e-08	7.8932	16.7471	0.115583	0.343169	12	723937	++++++++++++
W	EUR	4	55156329	C	T	rs1547512	KDR	0.483327	1.04863	0.008656	1.03167	1.06588	5.7063	1.18e-08	7.92651	16.1548	0.135482	0.319086	12	723937	++++++++++++
W	EUR	4	55156501	T	G	rs1547511	KDR	0.483041	1.04839	0.008655	1.03143	1.06563	5.67796	1.4e-08	7.85454	16.4531	0.125126	0.331433	12	723937	++++++++++++
W	EUR	4	55156736	T	A	rs9997685	KDR	0.288601	0.917261	0.008492	0.900617	0.934213	-9.24374	2.53e-20	19.597	30.9666	0.001115	0.644778	12	723937	--------+---
W	EUR	4	55156801	A	C	rs2899031	KDR	0.49541	1.05483	0.008721	1.03774	1.0722	6.40387	1.56e-10	9.80553	20.6281	0.037435	0.466746	12	723937	++++++++++++
W	EUR	4	55156838	A	C	rs58309017	KDR	0.495563	1.05607	0.009091	1.03825	1.07419	6.283	3.43e-10	9.46517	20.2205	0.016599	0.554907	10	645497	++++?++++?++
W	EUR	4	55157278	G	C	rs2412637	KDR	0.495349	1.0551	0.008724	1.038	1.07248	6.43447	1.28e-10	9.89268	20.6003	0.037756	0.466028	12	723937	++++++++++++
W	EUR	4	55157450	C	T	rs7679993	KDR	0.495382	1.05499	0.008723	1.0379	1.07237	6.42214	1.39e-10	9.85752	20.8032	0.035469	0.471234	12	723937	++++++++++++
W	EUR	4	55157570	A	T	rs7680198	KDR	0.494101	1.05546	0.008735	1.03834	1.07287	6.46921	1.02e-10	9.99211	20.302	0.041367	0.458182	12	723937	++++++++++++
W	EUR	4	55157580	A	G	rs7696256	KDR	0.494128	1.0553	0.008733	1.03818	1.07269	6.45069	1.15e-10	9.93902	20.4077	0.040053	0.460988	12	723937	++++++++++++
W	EUR	4	55157596	G	A	rs7675314	KDR	0.494014	1.05531	0.008734	1.03819	1.07272	6.45221	1.14e-10	9.94338	20.4122	0.039998	0.461107	12	723937	++++++++++++
W	EUR	4	55157896	C	G	rs17712245	KDR	0.491928	1.05536	0.008737	1.03823	1.07276	6.45549	1.11e-10	9.95279	19.9442	0.046112	0.448462	12	723937	++++++++++++
W	EUR	4	55157917	T	C	rs17774236	KDR	0.170117	0.915364	0.010559	0.894669	0.936537	-7.57961	3.62e-14	13.4409	22.0606	0.014799	0.546703	11	714850	--?---------
W	EUR	4	55158012	G	A	rs17081840	KDR	0.496405	1.0559	0.00873	1.03879	1.07329	6.52528	7.02e-11	10.1537	19.6437	0.050474	0.440023	12	723937	++++++++++++
W	EUR	4	55158032	C	T	rs62304733	KDR	0.492461	1.05532	0.008735	1.0382	1.07272	6.45252	1.14e-10	9.94427	19.6891	0.049791	0.441316	12	723937	++++++++++++
W	EUR	4	55159194	T	C	rs6554237	KDR	0.481418	1.05075	0.008808	1.03348	1.0683	5.85671	4.85e-09	8.31424	15.8378	0.10437	0.3686	11	704060	+++++++++++?
W	EUR	4	55161406	A	G	rs2412627	KDR	0.194563	0.915154	0.009767	0.89601	0.934706	-8.22029	2.14e-16	15.6704	24.3569	0.006707	0.589439	11	714850	--?---------
W	EUR	4	55162893	C	T	rs10050046	KDR	0.482719	0.952654	0.007945	0.937081	0.968485	-5.76814	8.23e-09	8.08477	24.9398	0.005461	0.599035	11	714850	--?---+++--+
W	EUR	4	55163307	C	A	rs3986292	KDR	0.446761	1.06066	0.009551	1.04194	1.07972	6.48253	9.32e-11	10.0304	20.1278	0.0053	0.652222	8	632473	+??+++?--++?
W	EUR	4	94697369	G	A	rs72617704	LOC110121104/BMPR1B-DT	0.14855	1.06788	0.012235	1.0439	1.09241	5.66778	1.48e-08	7.82876	14.2312	0.220461	0.227053	12	723937	+++-++++++++
W	EUR	4	94699074	T	G	rs72617705	LOC110121104/BMPR1B-DT	0.137715	1.0734	0.012887	1.04815	1.09927	5.83042	5.68e-09	8.24578	13.3936	0.268381	0.178711	12	723937	+++-++++++++
W	EUR	4	94700981	C	G	rs72882212	LOC110121104/BMPR1B-DT	0.121529	1.08276	0.013607	1.05609	1.1101	6.24895	4.26e-10	9.37039	14.4065	0.211311	0.236455	12	723937	+++-++++++++
W	EUR	4	94707330	A	G	rs11735755	LOC110121104/BMPR1B-DT	0.122212	1.07627	0.013529	1.04976	1.10346	5.77517	7.89e-09	8.10287	13.4674	0.263874	0.183215	12	723937	+++-++++++++
W	EUR	4	94714026	T	A	rs2036754	LOC110121104/BMPR1B-DT	0.128418	1.08594	0.013702	1.05908	1.11347	6.45305	1.13e-10	9.9458	5.99834	0.815402	0	11	714850	++?+++++++++
W	EUR	6	19724758	C	T	rs6909668	LOC110121134/LNC-LBCS	0.412191	1.0536	0.009368	1.03524	1.07228	5.82071	6.02e-09	8.22055	6.31571	0.611914	0	9	629388	++++?+?++?++
W	EUR	6	19756797	C	T	rs9368117	LNC-LBCS	0.4269	1.04754	0.008703	1.03048	1.06488	5.54423	3.02e-08	7.51944	7.07234	0.793195	0	12	723937	+++++++-++++
W	EUR	6	19760984	C	T	rs6916251	LNC-LBCS	0.435146	1.04732	0.008794	1.03009	1.06485	5.46105	4.84e-08	7.31483	8.59551	0.570872	0	11	695507	+++?+++-++++
W	EUR	6	19762721	T	G	rs6456260	LNC-LBCS	0.412909	1.04879	0.0089	1.03135	1.06653	5.56758	2.65e-08	7.57741	6.6475	0.758251	0	11	704060	+++++++-+++?
W	EUR	6	19763864	A	G	rs9350179	LNC-LBCS	0.421606	1.05133	0.008887	1.03391	1.06904	5.87208	4.42e-09	8.35438	7.43133	0.684193	0	11	695507	+++?+++-++++
W	EUR	6	19771276	G	A	rs1121384	LNC-LBCS	0.421154	1.05085	0.008888	1.03343	1.06856	5.81501	6.23e-09	8.20577	7.54336	0.673343	0	11	695507	+++?+++-++++
W	EUR	6	19777940	A	C	rs2223362	LNC-LBCS	0.421627	1.05107	0.008889	1.03365	1.06879	5.8411	5.33e-09	8.27356	7.30382	0.696485	0	11	695507	+++?+++-++++
W	EUR	6	19797910	T	C	rs6903595	LNC-LBCS	0.386086	1.04916	0.008971	1.03157	1.06704	5.56474	2.69e-08	7.57033	7.36517	0.690579	0	11	695507	+++?+++-++++
W	EUR	6	19798473	G	A	rs6904518	LNC-LBCS	0.377785	1.04882	0.009012	1.03115	1.06678	5.50024	3.88e-08	7.41086	7.13253	0.712877	0	11	704060	+++++++-+++?
W	EUR	6	19800741	A	G	rs6921766	LNC-LBCS	0.37826	1.0502	0.00888	1.03279	1.0679	5.74457	9.46e-09	8.02426	8.35677	0.681033	0	12	723937	+++++++-++++
W	EUR	6	19800757	A	G	rs6921778	LNC-LBCS	0.378452	1.0506	0.008885	1.03318	1.06831	5.78754	7.33e-09	8.13475	7.63	0.746014	0	12	723937	+++++++-++++
W	EUR	6	19801873	A	C	rs6938760	LNC-LBCS	0.377744	1.04985	0.008878	1.03245	1.06755	5.7053	1.19e-08	7.92397	7.31704	0.772859	0	12	723937	+++++++-++++
W	EUR	6	73808479	T	C	rs1392916	CD109	0.444519	1.05485	0.008742	1.03771	1.07227	6.39058	1.71e-10	9.76778	16.8784	0.111524	0.34828	12	723937	++-+++--+-+-
W	EUR	6	73810390	C	T	rs974112	CD109	0.475614	1.05436	0.008691	1.03732	1.07167	6.36917	1.96e-10	9.70717	15.4561	0.162552	0.288309	12	723937	++-++++++-+-
W	EUR	6	73811404	C	T	rs62438714	CD109	0.382726	1.05317	0.00907	1.03539	1.07125	5.9646	2.52e-09	8.59824	12.4428	0.256515	0.196321	11	695507	++-?++--+-+-
W	EUR	6	73811471	C	A	rs3005482	CD109	0.472457	1.0573	0.008706	1.04023	1.07464	6.71143	2e-11	10.6996	13.84	0.241972	0.205204	12	723937	++-++++++-++
W	EUR	6	73811612	G	T	rs3005485	CD109	0.472553	1.05708	0.008704	1.04002	1.07442	6.68712	2.36e-11	10.6275	14.1061	0.22718	0.220194	12	723937	++-++++++-++
W	EUR	6	73812224	T	C	rs2917862	CD109	0.479208	1.0566	0.008839	1.03928	1.07421	6.52717	6.93e-11	10.1591	13.7425	0.185064	0.27233	11	695507	++-?+++++-++
W	EUR	6	73812860	G	A	rs3005483	CD109	0.471749	1.05721	0.008703	1.04015	1.07455	6.70366	2.11e-11	10.6765	13.8626	0.240691	0.206496	12	723937	++-++++++++-
W	EUR	6	73813524	C	T	rs4373332	CD109	0.513637	0.947102	0.007793	0.931827	0.962627	-6.55162	5.89e-11	10.23	14.5032	0.20639	0.241545	12	723937	--+------+--
W	EUR	6	73813534	T	C	rs3005484	CD109	0.51331	0.947257	0.007793	0.931982	0.962781	-6.53307	6.66e-11	10.1762	14.3859	0.212369	0.235364	12	723937	--+------+--
W	EUR	6	73814225	T	C	rs3005486	CD109	0.607809	0.948257	0.008122	0.932337	0.964449	-6.15037	7.96e-10	9.09882	10.6233	0.387606	0.0586766	11	704060	--+---++-+-?
W	EUR	6	73814324	C	T	rs2917861	CD109	0.512975	0.945841	0.007905	0.930347	0.961593	-6.60744	4.05e-11	10.3928	13.0687	0.219855	0.234814	11	704060	--+------+-?
W	EUR	6	73814691	A	G	rs1370436	CD109	0.60843	0.950277	0.008015	0.934568	0.96625	-5.99694	2.07e-09	8.68434	12.4556	0.330386	0.116866	12	723937	--+---++-+-+
W	EUR	6	73815487	A	G	rs3005491	CD109	0.513043	0.947605	0.007793	0.93233	0.96313	-6.49108	8.81e-11	10.055	14.3948	0.211911	0.235836	12	723937	--+------+--
W	EUR	6	73815541	G	A	rs3012544	CD109	0.512934	0.947935	0.007796	0.932655	0.963466	-6.44878	1.17e-10	9.93357	15.1983	0.173597	0.276236	12	723937	--+------+--
W	EUR	6	73815856	G	A	rs1550227	CD109	0.513315	0.947448	0.007793	0.932174	0.962972	-6.51037	7.75e-11	10.1106	14.3353	0.214993	0.232663	12	723937	--+------+--
W	EUR	6	73816407	A	C	rs2917859	CD109	0.512702	0.949468	0.007891	0.934001	0.965191	-6.188	6.28e-10	9.20199	14.0852	0.16914	0.290036	11	679894	--+-?----+--
W	EUR	6	73816581	C	A	rs2917857	CD109	0.513919	0.946925	0.007996	0.931253	0.962861	-6.40475	1.56e-10	9.80804	12.5877	0.182169	0.285014	10	660017	--+-?------?
W	EUR	6	73816671	C	T	rs3012546	CD109	0.513316	0.947321	0.007791	0.93205	0.962842	-6.52697	6.94e-11	10.1585	14.3317	0.215182	0.232468	12	723937	--+------+--
W	EUR	6	73816672	A	G	rs3005496	CD109	0.513153	0.947472	0.007792	0.932199	0.962994	-6.50803	7.87e-11	10.1038	14.2355	0.220233	0.227286	12	723937	--+------+--
W	EUR	6	73817564	T	C	rs1866091	CD109	0.513591	0.948178	0.007797	0.932895	0.963711	-6.4185	1.42e-10	9.84713	14.8479	0.189568	0.259153	12	723937	--+---------
W	EUR	6	73817876	A	T	rs1866092	CD109	0.513854	0.9479	0.007795	0.932622	0.963429	-6.45368	1.13e-10	9.94759	14.3344	0.215038	0.232617	12	723937	--+--------+
W	EUR	6	73818570	A	G	rs3005506	CD109	0.51364	0.948432	0.007799	0.933146	0.963968	-6.38675	1.75e-10	9.75695	15.1091	0.177557	0.271961	12	723937	--+------+-+
W	EUR	6	73819090	C	T	rs3012562	CD109	0.51414	0.948833	0.00788	0.933387	0.964534	-6.27229	3.67e-10	9.43531	14.3079	0.159406	0.301084	11	679894	--+-?------+
W	EUR	6	73819121	T	C	rs3012563	CD109	0.514078	0.949368	0.007884	0.933915	0.965076	-6.20564	5.62e-10	9.25057	15.1452	0.126856	0.339726	11	679894	--+-?----+-+
W	EUR	6	73819980	G	A	rs3005527	CD109	0.521286	0.94506	0.008041	0.929301	0.961087	-6.58592	4.68e-11	10.3299	12.7425	0.174607	0.293704	10	675630	--+?-----+-?
W	EUR	6	73819985	A	G	rs2917893	CD109	0.513949	0.948627	0.007802	0.933335	0.964171	-6.36036	2.08e-10	9.68228	15.676	0.153593	0.298289	12	723937	--+------+-+
W	EUR	6	73820012	C	T	rs3012570	CD109	0.514487	0.949094	0.007884	0.93364	0.964803	-6.23813	4.57e-10	9.34038	14.7447	0.141651	0.32179	11	679894	--+-?------+
W	EUR	6	73820198	C	A	rs3012571	CD109	0.52095	0.945083	0.008038	0.92933	0.961104	-6.58581	4.68e-11	10.3296	12.7392	0.174769	0.293517	10	675630	--+?-----+-?
W	EUR	6	73820697	A	G	rs3005537	CD109	0.51388	0.948156	0.007797	0.932873	0.963689	-6.42114	1.4e-10	9.85466	14.9536	0.184629	0.264393	12	723937	--+--------+
W	EUR	6	73820781	G	A	rs3005538	CD109	0.514075	0.948114	0.007796	0.932834	0.963645	-6.42715	1.34e-10	9.87178	14.8166	0.191046	0.257592	12	723937	--+--------+
W	EUR	6	73821996	T	C	rs3012572	CD109	0.369373	0.949664	0.008396	0.933208	0.966411	-5.7909	7.19e-09	8.14342	5.72375	0.767217	0	10	675630	---?-------?
W	EUR	6	73822101	T	G	rs3012573	CD109	0.513679	0.948265	0.007798	0.932981	0.9638	-6.4075	1.53e-10	9.81586	14.9096	0.186672	0.262221	12	723937	--+--------+
W	EUR	6	73822308	A	G	rs2917869	CD109	0.608439	0.950497	0.008018	0.934781	0.966477	-5.9684	2.46e-09	8.60834	12.4047	0.334003	0.113241	12	723937	--+---++-+-+
W	EUR	6	73824362	A	G	rs3012518	CD109	0.365334	0.951903	0.008163	0.935903	0.968176	-5.69955	1.23e-08	7.90934	6.88086	0.808648	0	12	723937	------------
W	EUR	6	73829226	A	C	rs3012531	CD109	0.513109	0.951349	0.007826	0.93601	0.96694	-6.01361	1.87e-09	8.72887	14.1624	0.224136	0.223297	12	723937	--+--------+
W	EUR	6	73835840	A	G	rs7739411	CD109	0.548175	0.946057	0.008321	0.929748	0.962652	-6.25024	4.23e-10	9.37398	7.39571	0.388873	0.053505	8	616533	--?-?-++-?-?
W	EUR	6	73836701	G	A	rs4432951	CD109	0.540747	0.948876	0.008805	0.931619	0.966453	-5.60379	2.15e-08	7.66774	10.2488	0.174908	0.316992	8	496818	--?-?-++-??+
W	EUR	6	73836761	T	A	rs4615348	CD109	0.545765	0.951168	0.008205	0.935086	0.967526	-5.75465	8.91e-09	8.05012	10.4085	0.237514	0.2314	9	636410	--?-?-++-?-+
W	EUR	6	73837662	C	G	rs200630497	CD109	0.548152	0.948841	0.008339	0.932497	0.965472	-5.92352	3.24e-09	8.48952	7.85291	0.345743	0.108611	8	616533	--?-?-++-?-?
W	EUR	6	73840721	C	T	rs9447047	CD109	0.613855	0.950223	0.008362	0.933833	0.966901	-5.75158	9.07e-09	8.04222	10.1832	0.252402	0.214393	9	636410	--?-?-++-?-+
W	EUR	6	73842285	A	G	rs1837079	CD109	0.546824	0.952511	0.007897	0.937033	0.968244	-5.82085	6.01e-09	8.22093	13.2573	0.20964	0.245699	11	714850	--?---++---+
W	EUR	6	73844001	T	G	rs2917864	CD109	0.546324	0.951644	0.008099	0.935769	0.967788	-5.77494	7.9e-09	8.10226	9.94937	0.268598	0.195929	9	650930	--?-?-++---?
W	EUR	6	73845148	C	T	rs2351529	CD109	0.54682	0.952464	0.007895	0.936989	0.968194	-5.82762	5.77e-09	8.23849	13.1306	0.21646	0.238421	11	714850	--?---++---+
W	EUR	6	73845631	C	T	rs3005488	CD109	0.547216	0.953316	0.007863	0.937905	0.96898	-5.74967	9.18e-09	8.03732	13.5754	0.257384	0.189711	12	723937	------++---+
W	EUR	6	73847834	C	T	rs9447054	CD109	0.547051	0.953038	0.007859	0.937635	0.968695	-5.78567	7.41e-09	8.12992	13.4995	0.261937	0.185153	12	723937	--+---++---+
W	EUR	6	73847979	G	T	rs9447055	CD109	0.54033	0.95274	0.008164	0.936738	0.969015	-5.60219	2.17e-08	7.66374	11.8809	0.220104	0.242485	10	645497	----?-++-?-+
W	EUR	6	73851688	C	T	rs9447061	CD109	0.544426	0.949513	0.008291	0.933262	0.966046	-5.88201	4.16e-09	8.3804	8.67225	0.370695	0.0775169	9	625620	--+-?-++-?-?
W	EUR	6	73851926	A	C	rs3005490	CD109	0.540252	0.949755	0.00875	0.932606	0.967219	-5.5452	3.01e-08	7.52184	10.7021	0.219158	0.252481	9	505905	--+-?-++-??+
W	EUR	6	73853834	C	T	rs959369	CD109	0.546783	0.95055	0.007963	0.934943	0.966417	-6.00427	1.98e-09	8.70392	11.0866	0.350812	0.0980087	11	704060	--+---++---?
W	EUR	6	73856360	T	C	rs3012549	CD109	0.54702	0.95226	0.007853	0.936868	0.967905	-5.88371	4.12e-09	8.38484	12.2134	0.347815	0.0993529	12	723937	--+---++---+
W	EUR	6	73877946	T	G	rs2917891	CD109	0.618374	0.947114	0.008463	0.930526	0.963997	-6.02741	1.71e-09	8.76587	15.886	0.044041	0.496413	9	650930	-+?-?-+----?
W	EUR	6	73877977	G	T	rs3012568	CD109	0.638313	0.952922	0.008198	0.936855	0.969266	-5.55802	2.79e-08	7.55364	22.1069	0.008546	0.592887	10	670807	-+?+?-+--+--
W	EUR	6	73878698	T	C	rs969732	CD109/TXNP7	0.611225	0.949478	0.008071	0.93366	0.965565	-6.04805	1.51e-09	8.82129	25.4328	0.004583	0.606807	11	704060	--++--++-+-?
W	EUR	6	73879206	C	T	rs3012569	CD109/TXNP7	0.641244	0.954369	0.008095	0.938502	0.970503	-5.46035	4.86e-08	7.3131	28.3018	0.00291	0.611332	12	723937	-+++--+--+-+
W	EUR	6	73879481	G	C	rs3005505	CD109/TXNP7	0.611523	0.950151	0.007952	0.934565	0.965998	-6.0594	1.41e-09	8.85185	24.9268	0.009344	0.558709	12	723937	--++--++-+--
W	EUR	6	73879997	T	C	rs2917888	CD109/TXNP7	0.611217	0.949635	0.007945	0.934063	0.965467	-6.12596	9.29e-10	9.03222	24.6371	0.010299	0.553518	12	723937	--++--++-+--
W	EUR	6	73882169	T	C	rs1370439	CD109/TXNP7	0.612182	0.949582	0.007948	0.934003	0.965421	-6.12972	9.07e-10	9.04244	23.9096	0.01312	0.539934	12	723937	--++--++-+--
W	EUR	6	73893948	A	G	rs3005507	CD109/TXNP7	0.660573	1.04978	0.009186	1.03177	1.0681	5.50358	3.81e-08	7.41908	13.8038	0.244039	0.20312	12	723937	+-++++++++++
W	EUR	6	73896090	G	A	rs3005511	CD109/TXNP7	0.669728	1.0511	0.009408	1.03266	1.06987	5.51923	3.49e-08	7.45763	13.4215	0.20105	0.254927	11	695507	+-+?++++++++
W	EUR	6	73896609	G	T	rs1437568	CD109/TXNP7	0.660635	1.04938	0.009175	1.0314	1.06768	5.46604	4.71e-08	7.32701	13.9232	0.237272	0.209952	12	723937	+-++++++++++
W	EUR	6	73896722	A	G	rs3005512	CD109/TXNP7	0.352516	1.05293	0.009263	1.03477	1.0714	5.81149	6.36e-09	8.19666	20.689	0.014105	0.564986	10	675630	+--?++-++-+?
W	EUR	6	73898423	T	G	rs3005514	CD109/TXNP7	0.661	1.04936	0.009176	1.03137	1.06766	5.4622	4.81e-08	7.31764	13.6722	0.251668	0.195445	12	723937	+-++++++++++
W	EUR	6	73899187	T	G	rs1529992	CD109/TXNP7	0.660607	1.04936	0.009174	1.03137	1.06765	5.46321	4.79e-08	7.32011	13.8894	0.239176	0.208027	12	723937	+-++++++++++
W	EUR	6	73899471	G	A	rs3005515	CD109/TXNP7	0.346253	1.05031	0.008984	1.0327	1.06822	5.69037	1.3e-08	7.886	22.2567	0.022458	0.505766	12	723937	+--+++-++-+-
W	EUR	6	73900016	A	G	rs1437569	CD109/TXNP7	0.660628	1.04942	0.009175	1.03144	1.06772	5.47032	4.6e-08	7.33748	13.8927	0.238986	0.208219	12	723937	+-++++++++++
W	EUR	6	73900357	G	T	rs2917868	CD109/TXNP7	0.346249	1.05034	0.008984	1.03273	1.06825	5.69376	1.27e-08	7.89461	22.2274	0.02267	0.505115	12	723937	+--+++-++-+-
W	EUR	6	73900644	G	A	rs3005516	CD109/TXNP7	0.660643	1.04944	0.009174	1.03145	1.06773	5.47205	4.55e-08	7.34172	13.9683	0.234753	0.212502	12	723937	+-++++++++++
W	EUR	6	73901174	C	G	rs3012574	CD109/TXNP7	0.374481	1.05591	0.008899	1.03847	1.07365	6.40217	1.58e-10	9.8007	18.1404	0.07838	0.393618	12	723937	++-+++--+-++
W	EUR	6	73901331	A	G	rs3005519	CD109/TXNP7	0.661254	1.04982	0.009181	1.03182	1.06813	5.5117	3.64e-08	7.43906	14.3872	0.212304	0.235431	12	723937	+-++++++++++
W	EUR	6	73901916	G	A	rs1595344	CD109/TXNP7	0.661583	1.04986	0.009185	1.03186	1.06818	5.51396	3.59e-08	7.44464	14.5867	0.202209	0.24589	12	723937	+-++++++++++
W	EUR	6	73902649	T	A	rs3012577	CD109/TXNP7	0.374452	1.05586	0.0089	1.03842	1.0736	6.39559	1.65e-10	9.78201	18.2907	0.075076	0.398601	12	723937	++-+++--+-++
W	EUR	6	73902800	G	A	rs2917870	CD109/TXNP7	0.380879	1.05726	0.009026	1.03957	1.07525	6.46759	1.03e-10	9.98746	17.2827	0.068338	0.421387	11	695507	++-?++--+-++
W	EUR	6	73902866	C	G	rs2917871	CD109/TXNP7	0.660971	1.05002	0.009181	1.03202	1.06833	5.5339	3.21e-08	7.49387	14.4866	0.207226	0.240678	12	723937	+-++++++++++
W	EUR	6	73903145	T	C	rs3005520	CD109/TXNP7	0.374596	1.05595	0.0089	1.03851	1.07369	6.40604	1.54e-10	9.81169	17.6622	0.089757	0.377202	12	723937	++-+++--+-++
W	EUR	6	73903731	A	T	rs2118333	CD109/TXNP7	0.661812	1.05001	0.009186	1.03201	1.06833	5.53021	3.28e-08	7.48474	14.6358	0.199786	0.248417	12	723937	+-++++++++++
W	EUR	6	73910737	C	G	rs2917883	CD109/TXNP7	0.347075	1.05033	0.008987	1.03272	1.06825	5.6912	1.29e-08	7.88813	21.6718	0.027043	0.492429	12	723937	+--+++-++-++
W	EUR	6	73911477	G	A	rs2917884	CD109/TXNP7	0.661108	1.04951	0.009178	1.03152	1.06781	5.47848	4.39e-08	7.35744	14.6742	0.197902	0.250387	12	723937	+-++++++++++
W	EUR	6	73911789	C	A	rs2917885	CD109/TXNP7	0.660953	1.04998	0.009182	1.03199	1.06829	5.52968	3.29e-08	7.48344	14.4608	0.208535	0.239324	12	723937	+-++++++++++
W	EUR	6	73912668	T	A	rs2917886	CD109/TXNP7	0.346758	1.05064	0.008985	1.03303	1.06855	5.72776	1.04e-08	7.98125	21.5543	0.028063	0.489661	12	723937	+--+++-++-++
W	EUR	6	73913656	T	G	rs7752254	CD109/TXNP7	0.661182	1.04981	0.009178	1.03182	1.06811	5.51198	3.63e-08	7.43975	14.883	0.187914	0.260903	12	723937	+-++++++++++
W	EUR	6	73915591	C	T	rs9360714	CD109/TXNP7	0.346162	1.05082	0.008992	1.03319	1.06874	5.74345	9.52e-09	8.02138	21.5438	0.028155	0.489413	12	723937	+--+++-++-++
W	EUR	6	73915762	T	C	rs9343087	CD109/TXNP7	0.347206	1.05218	0.009141	1.03426	1.07041	5.80476	6.62e-09	8.17924	20.4543	0.025237	0.511105	11	704060	+--+++-++-+?
W	EUR	6	73916568	A	G	rs55661458	CD109/TXNP7	0.34673	1.05058	0.008985	1.03296	1.06849	5.72007	1.09e-08	7.9616	21.4932	0.028607	0.48821	12	723937	+--+++-++-++
W	EUR	6	73916782	T	C	rs61364563	CD109/TXNP7	0.346004	1.05072	0.008993	1.03309	1.06864	5.73159	1.02e-08	7.99103	21.5905	0.027745	0.490516	12	723937	+--+++-++-++
W	EUR	6	73917130	A	C	rs62440672	CD109/TXNP7	0.346725	1.05051	0.008985	1.0329	1.06842	5.7127	1.14e-08	7.94282	21.689	0.026896	0.492831	12	723937	+--+++-++-++
W	EUR	6	73917711	A	C	rs9360715	CD109/TXNP7	0.34673	1.05047	0.008984	1.03286	1.06838	5.70811	1.17e-08	7.93112	21.8227	0.025783	0.495939	12	723937	+--+++-++-++
W	EUR	6	73917859	A	C	rs9341440	CD109/TXNP7	0.661137	1.05017	0.009186	1.03216	1.06848	5.54749	2.97e-08	7.52752	14.3978	0.211758	0.235994	12	723937	+-++++++++++
W	EUR	6	73918193	A	C	rs9341441	CD109/TXNP7	0.346107	1.05008	0.008987	1.03246	1.06799	5.66109	1.54e-08	7.81184	22.8836	0.018355	0.519306	12	723937	+---++-++-++
W	EUR	6	73918738	T	G	rs12204104	CD109/TXNP7	0.374599	1.05548	0.008899	1.03804	1.07321	6.35111	2.21e-10	9.65621	18.8457	0.063919	0.416313	12	723937	++--++--+-++
W	EUR	6	73919613	G	A	rs143099684	CD109/TXNP7	0.345118	1.05393	0.009372	1.03556	1.07262	5.85487	4.9e-09	8.30944	19.9056	0.018504	0.547867	10	645497	+--+?+-++?++
W	EUR	6	73919906	A	G	rs62440674	CD109/TXNP7	0.346787	1.05035	0.008985	1.03274	1.06826	5.69418	1.27e-08	7.89569	21.8851	0.025278	0.497376	12	723937	+--+++-++-++
W	EUR	6	73920935	A	G	rs78672909	CD109/TXNP7	0.659884	1.04934	0.009183	1.03134	1.06765	5.45595	4.98e-08	7.30237	14.5687	0.203106	0.244956	12	723937	+-++++++++++
W	EUR	6	73921562	T	C	rs62440677	CD109/TXNP7	0.34856	1.05486	0.009541	1.03615	1.07389	5.85193	4.99e-09	8.30175	19.0092	0.014811	0.579151	9	625620	+--+?+-++?+?
W	EUR	6	73922444	T	G	rs12201439	CD109/TXNP7	0.345421	1.05386	0.009371	1.0355	1.07255	5.84855	5.09e-09	8.29296	19.4536	0.021601	0.53736	10	645497	+--+?+-++?++
W	EUR	6	73922545	A	C	rs6937216	CD109/TXNP7	0.373674	1.0597	0.00929	1.04149	1.07823	6.55703	5.68e-11	10.2457	15.6326	0.074962	0.424279	10	645497	++--?+--+?++
W	EUR	6	73923070	G	T	rs62440678	CD109/TXNP7	0.344873	1.05396	0.009374	1.03558	1.07266	5.8569	4.84e-09	8.31474	18.7266	0.027621	0.519399	10	645497	+--+?+-++?++
W	EUR	6	73923120	C	G	rs62440679	CD109/TXNP7	0.345486	1.05314	0.009367	1.03478	1.07183	5.7708	8.1e-09	8.09162	19.218	0.023402	0.53169	10	645497	+--+?+-++?++
W	EUR	6	73923274	G	T	rs62440680	CD109/TXNP7	0.373244	1.05953	0.009292	1.04132	1.07806	6.53708	6.49e-11	10.1878	15.5828	0.076123	0.422438	10	645497	++--?+--+?++
W	EUR	6	73923808	T	A	rs60632991	CD109/TXNP7	0.374658	1.05594	0.008905	1.03849	1.07369	6.40121	1.59e-10	9.79796	18.1181	0.07888	0.392873	12	723937	++-+++--+-++
W	EUR	6	73923941	C	T	rs12528991	CD109/TXNP7	0.346806	1.05095	0.00899	1.03333	1.06887	5.76002	8.63e-09	8.06389	20.9875	0.033501	0.475877	12	723937	+--+++-++-++
W	EUR	6	73924134	G	A	rs1898487	CD109/TXNP7	0.660997	1.04997	0.009186	1.03196	1.06828	5.52531	3.37e-08	7.47265	14.1633	0.224091	0.223343	12	723937	+-++++++++++
W	EUR	6	73928713	T	C	rs12212966	CD109/TXNP7	0.34611	1.05084	0.008999	1.0332	1.06878	5.74247	9.57e-09	8.01888	21.729	0.026559	0.493763	12	723937	+---++-++-++
W	EUR	6	73928896	C	G	rs12529606	CD109/TXNP7	0.34677	1.05119	0.008997	1.03355	1.06912	5.78304	7.53e-09	8.12313	21.1679	0.031673	0.480345	12	723937	+--+++-++-++
W	EUR	6	74120842	G	A	rs147857440	LOC101928516	0.382073	1.05111	0.009206	1.03307	1.06947	5.64243	1.72e-08	7.76478	11.2384	0.259724	0.199171	10	645497	+--+?+-++?++
W	EUR	6	74120884	G	A	rs146996419	LOC101928516	0.381769	1.05125	0.009209	1.0332	1.06961	5.65637	1.59e-08	7.79992	11.4849	0.243926	0.216365	10	645497	+--+?+-++?++
W	EUR	6	74120897	A	G	rs138349002	LOC101928516	0.384057	1.05104	0.009186	1.03304	1.06936	5.64698	1.67e-08	7.77622	11.8688	0.220808	0.241708	10	645497	+--+?+-++?++
W	EUR	6	74128781	A	T	rs1934020	LOC101928516	0.318091	1.051	0.009198	1.03297	1.06934	5.63451	1.8e-08	7.74484	17.9475	0.082807	0.387101	12	723937	+--+++-++-++
W	EUR	6	127113961	T	A	rs6916318	LOC105377989	0.517911	1.04977	0.00878	1.03256	1.06727	5.75996	8.63e-09	8.06374	7.96025	0.63272	0	11	695507	+++?++++++++
W	EUR	6	127114919	T	C	rs1936800	LOC105377989	0.511927	1.05454	0.008963	1.03697	1.07241	6.19615	5.96e-10	9.22443	8.3316	0.501105	0	10	675630	+++?+++++++?
W	EUR	6	127115168	G	A	rs1936801	LOC105377989	0.511521	1.05347	0.008807	1.0362	1.07102	6.17917	6.64e-10	9.17773	8.91526	0.540164	0	11	695507	+++?++++++++
W	EUR	6	127116472	T	C	rs2800708	LOC105377989	0.522695	1.05454	0.008818	1.03726	1.07211	6.29857	3.1e-10	9.50866	10.9253	0.363365	0.0846962	11	695507	+-+?++++++++
W	EUR	6	127118152	G	T	rs2800709	LOC105377989	0.515275	1.04866	0.00867	1.03167	1.06593	5.6998	1.23e-08	7.90996	16.7957	0.114066	0.34507	12	723937	+++-++++++++
W	EUR	6	127121947	C	T	rs9482770	RSPO3	0.441621	1.05167	0.009	1.03403	1.06961	5.83734	5.45e-09	8.26377	9.86026	0.361916	0.0872447	10	675630	+++?-++++++?
W	EUR	6	127125465	C	G	rs9482771	RSPO3	0.483097	1.05125	0.008785	1.03403	1.06876	5.93222	3.07e-09	8.5125	10.2779	0.416458	0.0270408	11	695507	+++?-+++++++
W	EUR	6	127125645	C	T	rs9482772	RSPO3	0.441453	1.05002	0.008837	1.03269	1.06763	5.75099	9.11e-09	8.04072	11.535	0.317379	0.133076	11	695507	+++?-++++++-
W	EUR	6	127127104	G	C	rs1936807	RSPO3	0.516402	1.05228	0.008796	1.03504	1.0698	6.04621	1.53e-09	8.81635	11.6895	0.306373	0.144533	11	695507	+++?-+++++++
W	EUR	6	127128101	G	A	rs1474696	RSPO3	0.512912	1.05043	0.008635	1.03351	1.06763	5.93752	2.98e-09	8.52651	12.993	0.293783	0.153391	12	723937	++++-+++++++
W	EUR	6	127128302	G	A	rs2745352	RSPO3	0.516338	1.05204	0.008792	1.03481	1.06956	6.02031	1.79e-09	8.74682	11.6947	0.306007	0.144913	11	695507	+++?-+++++++
W	EUR	6	127130520	T	C	rs1936806	RSPO3	0.441482	1.05169	0.008995	1.03406	1.06962	5.8429	5.27e-09	8.27823	9.93803	0.355525	0.094388	10	675630	+++?-++++++?
W	EUR	6	127130971	T	C	rs1936805	RSPO3	0.516772	1.05374	0.008954	1.03619	1.07158	6.10856	1.04e-09	8.98489	10.9844	0.276782	0.180654	10	675630	+++?-++++++?
W	EUR	6	127131281	G	C	rs1967685	RSPO3	0.516156	1.05268	0.008796	1.03544	1.0702	6.09301	1.14e-09	8.94269	11.3916	0.327833	0.12216	11	695507	+++?-+++++++
W	EUR	6	127131436	C	T	rs2800710	RSPO3	0.516778	1.0537	0.008954	1.03615	1.07154	6.10388	1.07e-09	8.97216	11.0168	0.274562	0.183063	10	675630	+++?-++++++?
W	EUR	6	127131494	G	C	rs9491696	RSPO3	0.483109	1.05105	0.008774	1.03385	1.06853	5.91586	3.39e-09	8.46934	10.144	0.427952	0.0141959	11	695507	+++?-+++++++
W	EUR	6	127131790	T	C	rs2745353	RSPO3	0.516955	1.05361	0.008946	1.03608	1.07144	6.09907	1.1e-09	8.95914	11.1111	0.268167	0.190002	10	675630	+++?-++++++?
W	EUR	6	127133884	G	A	rs2186037	RSPO3	0.512891	1.05049	0.008634	1.03357	1.06769	5.94518	2.84e-09	8.54676	13.1476	0.283787	0.163347	12	723937	+++--+++++++
W	EUR	6	127133993	T	C	rs7766106	RSPO3	0.483346	1.05286	0.008942	1.03533	1.07068	6.01407	1.86e-09	8.73011	9.58942	0.384734	0.0614657	10	675630	+++?-++++++?
W	EUR	6	127134676	C	A	rs2489623	RSPO3	0.52877	1.05039	0.008934	1.03287	1.06819	5.7313	1.02e-08	7.99028	11.7026	0.230599	0.230941	10	675630	+++?-++++++?
W	EUR	6	127134977	G	A	rs9491697	RSPO3	0.453523	1.04833	0.008947	1.03079	1.06616	5.48335	4.27e-08	7.36938	10.5189	0.310132	0.144396	10	675630	+++?-++++++?
W	EUR	6	127136115	G	A	rs2503322	RSPO3	0.546713	1.05103	0.008968	1.03346	1.06891	5.78425	7.48e-09	8.12626	9.01177	0.436188	0.00130629	10	675630	+++?-++++++?
W	EUR	6	127137163	A	G	rs2489625	RSPO3	0.541949	1.04698	0.008634	1.03006	1.06418	5.52231	3.43e-08	7.46523	12.7286	0.311431	0.135807	12	723937	+++--++++++-
W	EUR	6	127137859	T	G	rs2489626	RSPO3	0.545416	1.04934	0.008803	1.03208	1.06688	5.69308	1.28e-08	7.8929	10.8925	0.365956	0.0819349	11	695507	+++?-++++++-
W	EUR	6	127139204	A	G	rs1892171	RSPO3	0.546162	1.05163	0.008972	1.03405	1.06951	5.85109	5.02e-09	8.29957	8.86382	0.449938	0	10	675630	+++?-++++++?
W	EUR	6	127140007	C	T	rs2489627	RSPO3	0.54622	1.05154	0.008971	1.03395	1.06942	5.84084	5.33e-09	8.27287	8.93683	0.443126	0	10	675630	+++?-++++++?
W	EUR	6	127140537	C	A	rs1936802	RSPO3	0.545483	1.04918	0.008801	1.03193	1.06672	5.67556	1.42e-08	7.84844	10.9612	0.360546	0.0876937	11	695507	+++?-++++++-
W	EUR	6	127141004	C	T	rs2503106	RSPO3	0.545491	1.04916	0.008801	1.03191	1.0667	5.67367	1.43e-08	7.84368	10.9689	0.359945	0.088333	11	695507	+++?-++++++-
W	EUR	6	127142231	A	C	rs2503107	RSPO3	0.546304	1.05148	0.008966	1.03391	1.06936	5.83799	5.43e-09	8.26545	9.06519	0.431279	0.00719114	10	675630	+++?-++++++?
W	EUR	6	127142500	A	G	rs9285458	RSPO3	0.512079	1.04751	0.008748	1.03036	1.06494	5.51172	3.64e-08	7.43913	9.777	0.460271	0	11	695507	+++?-++++++-
W	EUR	6	127143609	T	C	rs2503320	RSPO3	0.545482	1.04917	0.008801	1.03191	1.06671	5.67407	1.43e-08	7.84468	11.0099	0.356745	0.091729	11	695507	+++?-++++++-
W	EUR	6	127143899	C	T	rs2503109	RSPO3	0.545513	1.0491	0.008785	1.03188	1.0666	5.67689	1.41e-08	7.85183	11.0445	0.354061	0.094572	11	695507	+++?-++++++-
W	EUR	6	127147043	A	G	rs2503111	RSPO3	0.545085	1.05263	0.008976	1.03503	1.07052	5.96424	2.53e-09	8.59728	9.39264	0.401847	0.0418028	10	675630	+++?+++++++?
W	EUR	6	127153186	T	G	rs2489628	RSPO3	0.546455	1.04846	0.00879	1.03123	1.06598	5.59829	2.22e-08	7.65399	12.3684	0.26116	0.191485	11	695507	+++?-++++++-
W	EUR	6	127154288	C	T	rs4382293	RSPO3	0.535971	1.04975	0.008924	1.03226	1.06754	5.66385	1.52e-08	7.81881	9.80294	0.366672	0.0819085	10	675630	+++?++-++++?
W	EUR	6	127155371	A	G	rs1892172	RSPO3	0.536134	1.04955	0.008916	1.03207	1.06732	5.64521	1.69e-08	7.77176	10.0259	0.348395	0.102323	10	675630	+++?++-++++?
W	EUR	6	127155572	T	C	rs2489629	RSPO3	0.547212	1.05056	0.008956	1.033	1.06841	5.73675	9.9e-09	8.00424	10.5918	0.304726	0.15029	10	675630	+++?-++++++?
W	EUR	6	127160665	G	A	rs11154386	RSPO3	0.51355	1.04859	0.008902	1.03114	1.06634	5.54209	3.06e-08	7.51413	9.62353	0.381813	0.064792	10	675630	+++?-++++++?
W	EUR	6	127165472	T	C	rs2489630	RSPO3	0.546131	1.04854	0.008791	1.03131	1.06606	5.6069	2.11e-08	7.67553	12.6855	0.241792	0.211698	11	695507	+++?-+-++++-
W	EUR	6	127166661	C	T	rs2154167	RSPO3	0.534993	1.04745	0.008732	1.03033	1.06485	5.51503	3.57e-08	7.44728	12.3817	0.260323	0.192356	11	695507	+++?-+-++++-
W	EUR	6	127167321	A	G	rs4559104	RSPO3	0.494005	1.04735	0.008728	1.03025	1.06475	5.50624	3.75e-08	7.42561	12.4851	0.328305	0.11895	12	723937	++++-++++++-
W	EUR	6	127169454	A	C	rs2489631	RSPO3	0.546923	1.05049	0.008958	1.03293	1.06834	5.72713	1.05e-08	7.97964	10.8082	0.289087	0.167297	10	675630	+++?-+-++++?
W	EUR	6	127175367	G	A	rs2503323	RSPO3	0.543287	1.04804	0.008781	1.03083	1.06553	5.55362	2.87e-08	7.54272	12.9966	0.223864	0.230566	11	704060	+++--++++++?
W	EUR	6	151086552	G	C	rs192969856	MTHFD1L	0.040608	1.20924	0.038012	1.13474	1.28863	5.85591	4.87e-09	8.31214	0	1		1	128171	+???????????
W	EUR	6	151343230	T	C	rs79433520	AKAP12	0.036783	1.14545	0.025766	1.09495	1.19828	5.90301	3.67e-09	8.43551	5.23048	0.919492	0	12	723937	++--++++++++
W	EUR	6	151351050	T	A	rs61748676	AKAP12	0.03839	1.132	0.022447	1.08801	1.17778	6.1305	9.02e-10	9.04459	20.1958	0.027455	0.504846	11	695507	+++?--+-+-+-
W	EUR	6	151353850	C	G	rs565235153	AKAP12	0.036332	1.33187	0.04332	1.24697	1.42257	8.52713	1.58e-17	16.8005	0	1		1	128171	+???????????
W	EUR	6	151364459	T	A	rs3186051	ZBTB2	0.036743	1.13724	0.025647	1.08697	1.18984	5.57564	2.53e-08	7.59746	8.03212	0.710424	0	12	723937	++-+-+++++++
W	EUR	6	151368706	A	G	rs9479018	ZBTB2	0.03677	1.13402	0.025551	1.08394	1.18641	5.45769	4.94e-08	7.30662	8.4717	0.67053	0	12	723937	++-+-++++++-
W	EUR	6	151369054	T	C	rs9371213	ZBTB2	0.036781	1.13413	0.025549	1.08405	1.18652	5.46282	4.8e-08	7.31914	8.40778	0.676376	0	12	723937	++---+++++++
W	EUR	6	151369634	T	A	rs9479019	ZBTB2	0.0369	1.13846	0.025736	1.08802	1.19124	5.60832	2.09e-08	7.6791	5.85714	0.827119	0	11	714850	++?+-+++++++
W	EUR	6	151369834	A	G	rs569970215	ZBTB2	0.035731	1.33444	0.043578	1.24903	1.4257	8.54912	1.31e-17	16.883	0	1		1	128171	+???????????
W	EUR	6	151372274	A	G	rs9371510	ZBTB2	0.035485	1.13706	0.026013	1.08607	1.19043	5.48758	4.17e-08	7.37977	7.27555	0.77635	0	12	723937	++-+-+++++++
W	EUR	6	151372381	A	G	rs149630620	ZBTB2	0.033724	1.14091	0.026687	1.08861	1.19573	5.5057	3.76e-08	7.42429	8.24554	0.691155	0	12	723937	++--++++++++
W	EUR	6	151379758	C	T	rs57968001	ZBTB2	0.042642	1.21008	0.02317	1.16467	1.25726	9.77084	1.6e-22	21.7948	16.6284	0.054864	0.458756	10	675630	++-?+++++++?
W	EUR	6	151379906	T	C	rs12525200	ZBTB2	0.22841	1.0591	0.010299	1.03891	1.07968	5.84834	5.1e-09	8.29241	16.1573	0.135392	0.319192	12	723937	++++-++-+++-
W	EUR	6	151381102	C	T	rs115805051	ZBTB2	0.041058	1.20515	0.022759	1.16054	1.25147	9.69679	3.32e-22	21.4788	18.6718	0.067246	0.410875	12	723937	++-+++++++++
W	EUR	6	151381307	G	C	rs6557132	ZBTB2	0.331162	1.05907	0.0094	1.04065	1.07783	6.40984	1.5e-10	9.8225	4.21879	0.936938	0	11	707828	++++++?-++++
W	EUR	6	151383413	C	T	rs75107694	ZBTB2	0.041034	1.20446	0.022747	1.15988	1.25076	9.66717	4.43e-22	21.3531	18.8429	0.063972	0.416226	12	723937	++-+++++++++
W	EUR	6	151384199	T	G	rs7775640	ZBTB2	0.227987	1.05925	0.010299	1.03906	1.07983	5.8636	4.65e-09	8.33223	16.3242	0.129515	0.326154	12	723937	++++-++-+++-
W	EUR	6	151385435	G	A	rs3900024	ZBTB2	0.228301	1.0592	0.010295	1.03903	1.07977	5.86121	4.72e-09	8.32598	16.2035	0.133742	0.321135	12	723937	++++-++-+++-
W	EUR	6	151385753	C	T	rs3849798	ZBTB2	0.228693	1.05905	0.010286	1.03889	1.0796	5.85052	5.03e-09	8.2981	15.5245	0.159722	0.291442	12	723937	++++-++-+++-
W	EUR	6	151386750	C	G	rs9397047	ZBTB2	0.228318	1.05897	0.010289	1.0388	1.07953	5.84073	5.34e-09	8.27258	15.6382	0.155102	0.296595	12	723937	++++-++-+++-
W	EUR	6	151387557	A	G	rs3860810	ZBTB2	0.228603	1.0594	0.01029	1.03923	1.07996	5.88434	4.11e-09	8.3865	15.6371	0.155146	0.296546	12	723937	++++-++-+++-
W	EUR	6	151388843	T	C	rs9383568	ZBTB2	0.040361	1.20473	0.023007	1.15964	1.25158	9.56951	1.14e-21	20.9413	19.0373	0.060426	0.422188	12	723937	++-+++++++++
W	EUR	6	151390891	A	G	rs139683250	ZBTB2	0.040757	1.21124	0.023469	1.16525	1.25906	9.70198	3.16e-22	21.5009	17.9302	0.056153	0.442281	11	704060	++-++++++++?
W	EUR	6	151391144	T	C	rs12528339	ZBTB2	0.227434	1.06429	0.010767	1.04318	1.08582	6.09725	1.11e-09	8.9542	12.4733	0.187923	0.278458	10	645497	++++?++-+?+-
W	EUR	6	151392202	T	C	rs9397400	LOC124901232	0.228135	1.06048	0.0103	1.04029	1.08106	5.98797	2.19e-09	8.66041	16.2901	0.130699	0.324743	12	723937	++++-++-+++-
W	EUR	6	151392914	A	G	rs4870016	LOC124901232	0.229552	1.05983	0.010252	1.03973	1.08031	5.94959	2.76e-09	8.55844	16.4728	0.124466	0.332232	12	723937	++++-++-+++-
W	EUR	6	151393571	T	C	rs9397401	LOC124901232	0.229553	1.05975	0.01025	1.03966	1.08023	5.94306	2.88e-09	8.54116	16.5153	0.123053	0.333951	12	723937	++++-++-+++-
W	EUR	6	151393970	A	G	rs10002	LOC124901232	0.230168	1.05945	0.010239	1.03939	1.07991	5.91937	3.32e-09	8.47859	15.906	0.144658	0.308435	12	723937	++++-++-+++-
W	EUR	6	151395387	C	T	rs6557134	LOC124901232	0.229607	1.05973	0.010249	1.03964	1.08021	5.94156	2.9e-09	8.53717	16.3643	0.128138	0.327803	12	723937	++++-++-+++-
W	EUR	6	151395725	C	T	rs9479029	LOC124901232	0.22962	1.05976	0.010246	1.03967	1.08023	5.94602	2.83e-09	8.54897	16.4324	0.125823	0.33059	12	723937	++++-++-+++-
W	EUR	6	151396167	G	A	rs7765741	LOC124901232	0.229857	1.05972	0.010243	1.03964	1.08018	5.94408	2.86e-09	8.54384	15.8602	0.146403	0.306438	12	723937	++++-++-+++-
W	EUR	6	151396520	A	G	rs7749424	LOC124901232	0.229877	1.05968	0.010242	1.0396	1.08014	5.94019	2.93e-09	8.53355	15.8319	0.147486	0.305202	12	723937	++++-++-+++-
W	EUR	6	151397064	C	T	rs10080229	LOC124901232	0.236256	1.05955	0.010241	1.03948	1.08001	5.92818	3.15e-09	8.50183	15.9132	0.144385	0.308748	12	723937	++++-++-+++-
W	EUR	6	151399534	G	T	rs4869729	LOC124901232	0.23034	1.06016	0.010242	1.04009	1.08062	5.98982	2.16e-09	8.66536	15.9112	0.144459	0.308664	12	723937	++++-++-+++-
W	EUR	6	151400117	G	A	rs9371513	LOC124901232	0.229829	1.0604	0.010251	1.04031	1.08088	6.00883	1.92e-09	8.71609	16.0448	0.139478	0.314418	12	723937	++++-++-+++-
W	EUR	6	151400481	C	G	rs7770865	LOC124901232	0.230331	1.06	0.010241	1.03992	1.08045	5.9737	2.39e-09	8.62242	15.9828	0.141772	0.311759	12	723937	++++-++-+++-
W	EUR	6	151400614	A	G	rs7771156	LOC124901232	0.330741	1.05817	0.009504	1.03954	1.07713	6.23919	4.54e-10	9.34332	5.40693	0.797491	0	10	687951	++++++?-+++?
W	EUR	6	151400699	T	G	rs7771204	LOC124901232	0.230323	1.06016	0.010242	1.04009	1.08062	5.98988	2.16e-09	8.6655	15.9081	0.144577	0.308528	12	723937	++++-++-+++-
W	EUR	6	151401065	T	C	rs7772990	LOC124901232	0.230099	1.06077	0.010254	1.04067	1.08126	6.04502	1.54e-09	8.81314	16.0676	0.138639	0.315393	12	723937	++++-++-+++-
W	EUR	6	151401330	C	T	rs7759049	LOC124901232	0.230142	1.06522	0.010705	1.04424	1.08662	6.2248	4.97e-10	9.30348	12.2148	0.201471	0.263186	10	645497	++++?++-+?+-
W	EUR	6	151402355	A	G	rs7739424	LOC124901232	0.229764	1.06042	0.010255	1.04032	1.08091	6.00895	1.92e-09	8.71641	15.9826	0.141779	0.311751	12	723937	++++-++-+++-
W	EUR	6	151402424	G	A	rs7764129	LOC124901232	0.230348	1.05977	0.010239	1.0397	1.08022	5.95086	2.74e-09	8.56179	15.7217	0.151782	0.300329	12	723937	++++-++-+++-
W	EUR	6	151404268	C	T	rs116621273	LOC124901232/RMND1	0.040935	1.20497	0.022842	1.1602	1.25147	9.65228	5.13e-22	21.2901	19.5657	0.051665	0.437791	12	723937	++-+++++++++
W	EUR	6	151404531	T	C	rs118069541	LOC124901232/RMND1	0.040901	1.2054	0.022857	1.1606	1.25193	9.6677	4.41e-22	21.3554	19.4238	0.053897	0.433685	12	723937	++-+++++++++
W	EUR	6	151405040	T	G	rs3757312	RMND1	0.230022	1.06045	0.010251	1.04035	1.08093	6.0137	1.87e-09	8.72911	15.7429	0.150949	0.30127	12	723937	++++-++-+++-
W	EUR	6	151405165	C	G	rs1065310	RMND1	0.229838	1.06055	0.010307	1.04035	1.08114	5.99144	2.14e-09	8.66966	15.5918	0.111929	0.358637	11	714850	++?+-++-+++-
W	EUR	6	151405621	C	T	rs3757314	RMND1	0.229983	1.0602	0.01025	1.04011	1.08067	5.98885	2.17e-09	8.66275	16.0419	0.139582	0.314296	12	723937	++++-++-+++-
W	EUR	6	151405694	T	C	rs3757315	RMND1	0.236312	1.05906	0.010308	1.03886	1.07966	5.83937	5.38e-09	8.26906	15.2622	0.122792	0.344785	11	695507	+++?-++-+++-
W	EUR	6	151406382	A	G	rs9383887	RMND1	0.230297	1.06002	0.010246	1.03994	1.08049	5.97296	2.4e-09	8.62045	15.8683	0.14609	0.306795	12	723937	++++-++-+++-
W	EUR	6	151406410	T	C	rs9397403	RMND1	0.331826	1.05931	0.00937	1.04094	1.078	6.457	1.1e-10	9.9571	4.75308	0.907051	0	11	707828	++++++?-++++
W	EUR	6	151406458	T	A	rs9383888	RMND1	0.230279	1.06003	0.010248	1.03995	1.0805	5.97322	2.39e-09	8.62115	15.9375	0.143466	0.309805	12	723937	++++-++-+++-
W	EUR	6	151407049	G	A	rs7769780	RMND1	0.23039	1.06092	0.010256	1.04082	1.08141	6.05938	1.41e-09	8.85181	15.8994	0.144909	0.308148	12	723937	++++-++-+++-
W	EUR	6	151407337	C	T	rs7774446	RMND1	0.229892	1.06149	0.01027	1.04136	1.08201	6.10865	1.03e-09	8.98513	15.7642	0.150113	0.302217	12	723937	++++-++-+++-
W	EUR	6	151407579	C	T	rs6557135	RMND1	0.332439	1.05923	0.009368	1.04087	1.07791	6.44977	1.16e-10	9.93641	4.77543	0.905665	0	11	707828	++++++?-++++
W	EUR	6	151409097	G	C	rs78375092	RMND1	0.04039	1.20832	0.023231	1.16278	1.25563	9.65574	4.96e-22	21.3047	20.6556	0.03712	0.467457	12	723937	++---+++++++
W	EUR	6	151409667	T	C	rs9383889	RMND1	0.189533	1.08188	0.011232	1.05987	1.10435	7.50299	6.52e-14	13.186	19.1049	0.038951	0.476573	11	707828	++--++?+-+++
W	EUR	6	151409768	G	A	rs9383890	RMND1	0.04042	1.20625	0.023194	1.16079	1.25349	9.56718	1.17e-21	20.9315	21.7041	0.026769	0.493183	12	723937	++---+++++++
W	EUR	6	151410882	T	C	rs6557138	RMND1	0.395127	1.06537	0.009134	1.04747	1.08357	7.32351	2.52e-13	12.5988	7.09703	0.716254	0	11	707828	++++++?-++++
W	EUR	6	151411250	C	T	rs6921042	RMND1	0.393664	1.06477	0.009134	1.04687	1.08298	7.25429	4.21e-13	12.376	6.778	0.746224	0	11	707828	++++++?-++++
W	EUR	6	151412916	A	C	rs9383891	RMND1	0.166532	1.08251	0.01262	1.05777	1.10782	6.72228	1.85e-11	10.7319	4.7932	0.685183	0	8	609511	++++?+?++?+?
W	EUR	6	151413062	G	C	rs9397404	RMND1	0.166436	1.07406	0.011845	1.05084	1.09779	6.40788	1.52e-10	9.81693	9.14615	0.518292	0	11	707828	++++-+?++++-
W	EUR	6	151413863	C	T	rs57689380	RMND1	0.039476	1.21502	0.023436	1.16909	1.26276	9.90499	4.23e-23	22.3733	22.4163	0.021339	0.509285	12	723937	++--+++++++-
W	EUR	6	151414949	T	G	rs9397405	RMND1	0.395173	1.06563	0.009134	1.04773	1.08384	7.35444	2e-13	12.699	6.84554	0.739942	0	11	707828	++++++?-++++
W	EUR	6	151416042	T	G	rs147230474	RMND1	0.038508	1.21765	0.023763	1.17107	1.26608	9.89636	4.61e-23	22.3358	23.4188	0.015419	0.530292	12	723937	++--+++++++-
W	EUR	6	151416996	G	A	rs3778608	RMND1	0.395182	1.06572	0.009132	1.04782	1.08393	7.36608	1.83e-13	12.7369	6.74163	0.74959	0	11	707828	++++++?-++++
W	EUR	6	151417816	A	T	rs9322319	RMND1	0.276177	1.0602	0.01043	1.03975	1.08104	5.88406	4.11e-09	8.38576	2.3125	0.969902	0	9	629388	++++?+?-+?++
W	EUR	6	151418178	T	C	rs76010945	RMND1	0.150244	1.07503	0.012631	1.05027	1.10037	6.08606	1.19e-09	8.92389	15.4005	0.118127	0.350672	11	707828	+++--+?-+++-
W	EUR	6	151418507	A	G	rs9371516	RMND1	0.394512	1.06667	0.009291	1.04846	1.0852	7.34718	2.11e-13	12.6755	6.47377	0.691723	0	10	687951	++++++?-+++?
W	EUR	6	151418675	T	G	rs9371517	RMND1	0.39519	1.06582	0.009133	1.04792	1.08403	7.37686	1.69e-13	12.7719	6.70281	0.753172	0	11	707828	++++++?-++++
W	EUR	6	151419832	C	T	rs9371518	RMND1	0.277818	1.05627	0.009955	1.03676	1.07615	5.75512	8.89e-09	8.05132	6.87612	0.737086	0	11	707828	++++-+?-++++
W	EUR	6	151420454	C	A	rs187517811	RMND1	0.035548	1.33884	0.043541	1.2535	1.42999	8.68359	4.05e-18	17.3922	0	1		1	128171	+???????????
W	EUR	6	151422494	C	A	rs6912830	RMND1	0.395319	1.06574	0.009131	1.04784	1.08394	7.36794	1.81e-13	12.7429	6.80605	0.743619	0	11	707828	++++++?-++++
W	EUR	6	151423148	A	G	rs3800272	RMND1	0.395369	1.06544	0.009128	1.04755	1.08364	7.33672	2.28e-13	12.6416	6.96909	0.72836	0	11	707828	++++++?-++++
W	EUR	6	151424387	T	C	rs6557139	RMND1	0.25887	1.06594	0.010148	1.04605	1.08621	6.64463	3.15e-11	10.502	16.3657	0.089632	0.388965	11	707828	+-+-++?-++++
W	EUR	6	151427185	A	G	rs139696728	RMND1	0.036676	1.22805	0.025909	1.17727	1.28102	9.53426	1.61e-21	20.7936	24.8657	0.005606	0.59784	11	584345	++---++-++?-
W	EUR	6	151428634	T	C	rs9371519	RMND1	0.149927	1.07348	0.012621	1.04875	1.0988	5.9612	2.58e-09	8.58921	17.4745	0.064502	0.427738	11	707828	+++--+?-+++-
W	EUR	6	151430773	G	C	rs9322320	RMND1	0.395709	1.06496	0.00911	1.04711	1.08312	7.2956	3.1e-13	12.5087	7.38576	0.688593	0	11	707828	++++++?-++++
W	EUR	6	151432260	G	A	rs6936936	RMND1	0.395719	1.06483	0.009108	1.04698	1.08299	7.2828	3.41e-13	12.4675	7.39643	0.687564	0	11	707828	++++++?-++++
W	EUR	6	151432286	G	C	rs6914656	RMND1	0.395739	1.06509	0.009111	1.04724	1.08325	7.3103	2.78e-13	12.5561	7.39295	0.6879	0	11	707828	++++++?-++++
W	EUR	6	151432335	C	G	rs6913515	RMND1	0.394994	1.06476	0.009109	1.0469	1.08292	7.27235	3.68e-13	12.4339	7.24763	0.701878	0	11	707828	++++++?-++++
W	EUR	6	151433138	C	T	rs6904364	RMND1	0.387624	1.06019	0.009097	1.04236	1.07832	6.7538	1.49e-11	10.8259	7.5892	0.668894	0	11	707828	++++++?-++++
W	EUR	6	151433609	A	G	rs2046371	RMND1	0.380713	1.05932	0.008946	1.04179	1.07715	6.76763	1.36e-11	10.8673	9.96158	0.533847	0	12	723937	++++-++-++++
W	EUR	6	151434671	A	G	rs6930557	RMND1	0.387371	1.06455	0.008951	1.04701	1.08239	7.37864	1.67e-13	12.7777	9.36287	0.588436	0	12	723937	++++-++-++++
W	EUR	6	151434935	G	A	rs9479041	RMND1	0.387384	1.0644	0.008949	1.04686	1.08223	7.36172	1.89e-13	12.7227	9.39826	0.585182	0	12	723937	++++-++-++++
W	EUR	6	151435477	G	A	rs8180642	RMND1	0.379045	1.06079	0.009107	1.04294	1.07894	6.8163	9.69e-12	11.0137	8.68779	0.561967	0	11	704060	++++-++-+++?
W	EUR	6	151436192	C	T	rs9383893	RMND1	0.387371	1.06445	0.00895	1.04691	1.08228	7.36726	1.82e-13	12.7407	9.36695	0.588061	0	12	723937	++++-++-++++
W	EUR	6	151436907	G	C	rs6557140	RMND1	0.164455	1.07189	0.011975	1.04842	1.09589	6.14631	8.17e-10	9.08773	15.7146	0.15206	0.300015	12	723937	++++-+--+++-
W	EUR	6	151437900	C	G	rs3800273	RMND1	0.387004	1.06489	0.008951	1.04734	1.08272	7.41746	1.25e-13	12.9045	9.21895	0.60169	0	12	723937	++++-++-++++
W	EUR	6	151438057	G	T	rs3800274	RMND1	0.269359	1.05688	0.010151	1.03698	1.07716	5.70543	1.19e-08	7.92429	9.54104	0.3889	0.0567068	10	675630	+++?-+--+++?
W	EUR	6	151438495	C	T	rs9322321	RMND1	0.289601	1.06584	0.009793	1.04665	1.08539	6.8769	6.35e-12	11.1973	14.1465	0.166414	0.293111	11	695507	+-+?+++-++++
W	EUR	6	151438545	A	G	rs186668874	RMND1	0.035544	1.33784	0.043495	1.25259	1.4289	8.66413	4.81e-18	17.318	0	1		1	128171	+???????????
W	EUR	6	151438764	A	C	rs9397050	RMND1	0.163167	1.07238	0.01222	1.04842	1.09687	6.06306	1.37e-09	8.86172	13.996	0.173174	0.28551	11	704060	++++-+--+++?
W	EUR	6	151438870	C	T	rs9637989	RMND1	0.163296	1.06953	0.01198	1.04605	1.09354	5.93504	3.02e-09	8.51993	15.6117	0.156171	0.295399	12	723937	++++-+--+++-
W	EUR	6	151439247	T	C	rs9397409	RMND1	0.280601	1.06594	0.009881	1.04657	1.08567	6.8259	9.06e-12	11.0427	13.6745	0.188362	0.268713	11	704060	+-+++++-+++?
W	EUR	6	151440486	G	A	rs7752091	RMND1	0.281473	1.06394	0.009693	1.04495	1.08329	6.74286	1.61e-11	10.7932	15.1643	0.175098	0.274612	12	723937	+-+++++-++++
W	EUR	6	151441034	C	T	rs3800275	RMND1	0.053158	1.1895	0.021289	1.14777	1.23274	9.52449	1.77e-21	20.7527	16.3191	0.06051	0.448498	10	675630	++-?+++++++?
W	EUR	6	151441170	C	A	rs73783017	RMND1	0.051364	1.18325	0.020826	1.14243	1.22552	9.39399	6.15e-21	20.2113	22.0272	0.024164	0.500617	12	723937	++-++++++++-
W	EUR	6	151441209	G	A	rs73783018	RMND1	0.168692	1.08915	0.011645	1.06632	1.11246	7.90313	2.85e-15	14.5448	23.6982	0.014067	0.53583	12	723937	+-++++++++++
W	EUR	6	151441475	C	G	rs6940667	RMND1	0.051278	1.18336	0.020844	1.14251	1.22568	9.39211	6.26e-21	20.2036	21.8022	0.025951	0.495464	12	723937	++-++++++++-
W	EUR	6	151442265	G	A	rs73783019	RMND1	0.05138	1.18329	0.020824	1.14247	1.22556	9.39725	5.96e-21	20.2248	21.7651	0.026257	0.494604	12	723937	++-++++++++-
W	EUR	6	151443104	C	T	rs73783022	RMND1	0.052054	1.18813	0.020965	1.14704	1.23069	9.59896	8.61e-22	21.065	17.2729	0.068539	0.421059	11	704060	++-++++++++?
W	EUR	6	151443404	T	C	rs55747952	RMND1	0.061585	1.16299	0.019287	1.12519	1.20206	8.95594	3.57e-19	18.4474	22.023	0.024195	0.500523	12	723937	++-++++++++-
W	EUR	6	151443513	G	A	rs59753385	RMND1	0.168795	1.08958	0.011645	1.06676	1.11289	7.94335	2.06e-15	14.6851	23.8303	0.013468	0.538403	12	723937	+-++++++++++
W	EUR	6	151443530	T	C	rs7748785	RMND1	0.051378	1.18181	0.020657	1.14132	1.22373	9.39216	6.25e-21	20.2038	21.9082	0.025094	0.497904	12	723937	++-++++++++-
W	EUR	6	151443588	G	C	rs7748822	RMND1	0.16879	1.0896	0.011645	1.06677	1.11291	7.94446	2.05e-15	14.689	23.8761	0.013266	0.539288	12	723937	+-++++++++++
W	EUR	6	151443820	A	C	rs3800276	RMND1	0.0519	1.18206	0.020585	1.14172	1.22384	9.43968	3.98e-21	20.4001	20.3695	0.040523	0.459977	12	723937	++-++++++++-
W	EUR	6	151444161	C	T	rs3823311	RMND1	0.168779	1.08956	0.011644	1.06674	1.11287	7.94178	2.09e-15	14.6796	23.7401	0.013874	0.53665	12	723937	+-++++++++++
W	EUR	6	151444221	T	G	rs3800277	RMND1	0.168805	1.08967	0.011644	1.06685	1.11298	7.95187	1.93e-15	14.715	24.0442	0.012548	0.542509	12	723937	+-++++++++++
W	EUR	6	151444376	T	G	rs3800278	RMND1	0.051264	1.18409	0.020858	1.1432	1.22643	9.42573	4.55e-21	20.3423	21.6861	0.026921	0.492762	12	723937	++-++++++++-
W	EUR	6	151445027	C	T	rs3800279	RMND1	0.266296	1.06864	0.009771	1.04949	1.08814	7.19566	6.47e-13	12.1889	14.4137	0.210941	0.236837	12	723937	++++++++++++
W	EUR	6	151445064	G	A	rs3800280	RMND1	0.051377	1.18164	0.02065	1.14117	1.22355	9.38599	6.63e-21	20.1784	21.7789	0.026143	0.494924	12	723937	++-++++++++-
W	EUR	6	151445262	A	G	rs73783025	RMND1	0.051371	1.18189	0.020656	1.14141	1.22381	9.39725	5.96e-21	20.2248	21.3288	0.03012	0.484265	12	723937	++-++++++++-
W	EUR	6	151446348	G	A	rs76363440	RMND1	0.168199	1.08937	0.011654	1.06653	1.1127	7.91716	2.55e-15	14.5937	24.1681	0.012043	0.544854	12	723937	+-+++++++++-
W	EUR	6	151446772	G	A	rs2128945	RMND1	0.386244	1.06422	0.008937	1.0467	1.08203	7.35001	2.07e-13	12.6846	9.85173	0.543772	0	12	723937	+++++++-++++
W	EUR	6	151447397	C	T	rs35143743	RMND1	0.265932	1.07123	0.009954	1.05172	1.09111	7.3376	2.27e-13	12.6444	12.689	0.241582	0.211918	11	704060	+++++++++++?
W	EUR	6	151447997	A	G	rs7741193	RMND1	0.168253	1.08898	0.011651	1.06614	1.1123	7.88341	3.34e-15	14.4762	23.9388	0.012994	0.540494	12	723937	+-+++++++++-
W	EUR	6	151450704	C	T	rs9371521	RMND1	0.382311	1.06691	0.010273	1.04678	1.08744	6.66275	2.78e-11	10.5554	7.49012	0.37969	0.0654354	8	486028	++++?++-+???
W	EUR	6	151452369	C	T	rs13201167	RMND1/ARMT1	0.399171	1.06438	0.009015	1.04671	1.08235	7.30543	2.88e-13	12.5404	9.78167	0.459852	0	11	695507	+++?-+++++++
W	EUR	6	151452696	T	C	rs111270458	ARMT1	0.052237	1.17719	0.020387	1.13724	1.21856	9.25913	2.19e-20	19.6595	19.4516	0.034888	0.485903	11	714850	++?++++++++-
W	EUR	6	151453781	A	G	rs3806982	ARMT1	0.389643	1.06499	0.008921	1.0475	1.08276	7.45486	9.39e-14	13.0272	9.95443	0.534491	0	12	723937	++++++++++++
W	EUR	6	151454124	A	C	rs1825368	ARMT1	0.389737	1.06489	0.008921	1.0474	1.08266	7.4429	1.03e-13	12.9879	10.1225	0.519406	0	12	723937	++++++++++++
W	EUR	6	151455029	T	G	rs17081262	ARMT1	0.053577	1.17839	0.020125	1.13895	1.2192	9.4499	3.61e-21	20.4424	21.2996	0.030396	0.483559	12	723937	++-++++++++-
W	EUR	6	151457138	T	C	rs73783029	ARMT1	0.053772	1.17902	0.020117	1.13959	1.21981	9.48957	2.47e-21	20.6072	20.9807	0.033571	0.47571	12	723937	++-++++++++-
W	EUR	6	151460228	C	T	rs13212683	ARMT1	0.391526	1.06603	0.008927	1.04853	1.08381	7.57218	3.84e-14	13.4161	9.07964	0.614541	0	12	723937	++++-+++++++
W	EUR	6	151460269	A	T	rs13212693	ARMT1	0.391503	1.06622	0.008927	1.04872	1.08401	7.59565	3.2e-14	13.4946	8.861	0.634721	0	12	723937	++++-+++++++
W	EUR	6	151460644	T	C	rs138584427	ARMT1	0.053772	1.18002	0.020137	1.14055	1.22085	9.53707	1.57e-21	20.8053	20.6995	0.036621	0.468586	12	723937	++-++++++++-
W	EUR	6	151461409	A	G	rs79540726	ARMT1	0.053719	1.17984	0.020139	1.14036	1.22067	9.5254	1.75e-21	20.7566	20.9957	0.033416	0.476083	12	723937	++-++++++++-
W	EUR	6	151461681	C	A	rs9383900	ARMT1	0.391417	1.06623	0.008927	1.04873	1.08402	7.59617	3.19e-14	13.4963	9.2054	0.602939	0	12	723937	++++-+++++++
W	EUR	6	151462914	T	G	rs6557142	ARMT1	0.053735	1.17999	0.020136	1.14053	1.22083	9.53604	1.58e-21	20.8011	21.0869	0.032482	0.478349	12	723937	++-++++++++-
W	EUR	6	151464416	G	A	rs17081270	ARMT1	0.053593	1.18184	0.020332	1.14199	1.22308	9.54676	1.43e-21	20.8459	19.3726	0.054725	0.432186	12	723937	++-++++++++-
W	EUR	6	151465042	A	G	rs6931104	ARMT1	0.390756	1.06811	0.009093	1.05028	1.08623	7.67449	1.74e-14	13.76	7.85808	0.642697	0	11	704060	++++-++++++?
W	EUR	6	151467049	T	G	rs7748711	ARMT1	0.053729	1.18109	0.020165	1.14157	1.22198	9.58432	9.92e-22	21.0035	19.9478	0.046062	0.448561	12	723937	++-++++++++-
W	EUR	6	151467827	A	G	rs58952168	ARMT1	0.052864	1.18211	0.020504	1.14192	1.22371	9.48058	2.69e-21	20.5698	21.3003	0.03039	0.483576	12	723937	++--+++++++-
W	EUR	6	151468147	C	A	rs3734801	ARMT1	0.053825	1.17763	0.020096	1.13825	1.21839	9.42069	4.77e-21	20.3215	20.6814	0.036827	0.46812	12	723937	++--+++++++-
W	EUR	6	151468220	G	T	rs963193	ARMT1	0.391954	1.06538	0.008929	1.04788	1.08317	7.49459	6.95e-14	13.1582	9.41451	0.583689	0	12	723937	++++++++++++
W	EUR	6	151470891	C	T	rs74798609	ARMT1/LOC124901434	0.17401	1.08902	0.011513	1.06645	1.11206	7.98252	1.5e-15	14.8225	20.8957	0.034468	0.473577	12	723937	+-+++++++++-
W	EUR	6	151473569	C	T	rs6937816	ARMT1/LOC124901434	0.296566	1.07789	0.009662	1.05895	1.09717	8.29356	1.16e-16	15.9366	15.984	0.141727	0.311811	12	723937	+-+++++-+++-
W	EUR	6	151474859	C	A	rs9478208	LOC124901434	0.388887	1.06842	0.00899	1.0508	1.08634	7.80103	6.43e-15	14.1916	8.6137	0.657501	0	12	723937	+++++++-+++-
W	EUR	6	151478139	C	A	rs7762223	LOC124901434	0.054554	1.18499	0.020303	1.1452	1.22617	9.73932	2.19e-22	21.66	18.1423	0.078336	0.393683	12	723937	++-++++++++-
W	EUR	6	151478220	T	A	rs1553002	LOC124901434	0.385082	1.07176	0.00903	1.05406	1.08976	8.15723	3.6e-16	15.4432	8.8529	0.635468	0	12	723937	+++++++++++-
W	EUR	6	151479626	T	G	rs9397412	LOC124901434/CCDC170	0.382317	1.07156	0.009044	1.05384	1.08959	8.12146	4.84e-16	15.315	9.69651	0.557875	0	12	723937	+++++++++++-
W	EUR	6	151481102	G	A	rs140993356	LOC124901434/CCDC170	0.036388	1.22644	0.024317	1.17877	1.27603	10.093	6.36e-24	23.1968	19.4346	0.053725	0.433998	12	723937	++--++++++++
W	EUR	6	151482619	A	C	rs6933660	LOC124901434/CCDC170	0.318447	1.08684	0.00964	1.06794	1.10607	9.30615	1.41e-20	19.851	16.7592	0.079866	0.403312	11	695507	+++?++++++++
W	EUR	6	151484967	G	A	rs9371219	LOC124901434/CCDC170	0.310162	1.08625	0.009556	1.06752	1.10531	9.32305	1.2e-20	19.9201	16.8492	0.112416	0.34715	12	723937	++++++++++++
W	EUR	6	151484989	G	A	rs9397413	LOC124901434/CCDC170	0.310127	1.08623	0.009556	1.0675	1.10529	9.32007	1.24e-20	19.9079	16.9208	0.11024	0.349913	12	723937	++++++++++++
W	EUR	6	151485148	G	A	rs9397414	LOC124901434/CCDC170	0.310113	1.08631	0.009557	1.06758	1.10537	9.329	1.14e-20	19.9444	16.9133	0.110465	0.349626	12	723937	++++++++++++
W	EUR	6	151493318	T	C	rs79554419	LOC124901434/CCDC170	0.054382	1.1862	0.020388	1.14624	1.22755	9.7664	1.68e-22	21.7758	18.165	0.077831	0.394439	12	723937	++-++++++++-
W	EUR	6	151494876	C	T	rs1971256	CCDC170	0.202954	1.10867	0.011076	1.08696	1.13081	10.2249	1.64e-24	23.7839	34.3046	0.000322	0.679343	12	723937	+-+++++++++-
W	EUR	6	151495402	A	T	rs77600257	CCDC170	0.052859	1.18715	0.020563	1.14684	1.22887	9.73497	2.28e-22	21.6415	18.4969	0.070745	0.405304	12	723937	++-++++++++-
W	EUR	6	151498699	G	A	rs9383906	CCDC170	0.084216	1.14707	0.016548	1.11464	1.18045	9.37648	7.26e-21	20.1393	35.6285	0.000195	0.691259	12	723937	+++--++++++-
W	EUR	6	151498722	T	C	rs115429675	CCDC170	0.05292	1.18619	0.020559	1.14589	1.2279	9.68301	3.8e-22	21.4203	19.5602	0.05175	0.437633	12	723937	++--+++++++-
W	EUR	6	151499889	T	A	rs9383911	CCDC170	0.08014	1.15881	0.016971	1.12555	1.19306	9.91925	3.67e-23	22.4352	34.4978	0.0003	0.68114	12	723937	+++--++++++-
W	EUR	6	151501021	C	G	rs4869733	CCDC170	0.080533	1.15976	0.016924	1.12658	1.1939	10.0104	1.47e-23	22.8332	34.222	0.000333	0.67857	12	723937	+++--++++++-
W	EUR	6	151502766	C	A	rs7762963	CCDC170	0.052398	1.19447	0.021117	1.15308	1.23734	9.87612	5.65e-23	22.2481	15.2681	0.122588	0.345041	11	704060	++-++++++++?
W	EUR	6	151503314	A	G	rs12173791	CCDC170	0.080672	1.16807	0.017292	1.13418	1.20297	10.3412	4.92e-25	24.3077	26.1711	0.003517	0.617899	11	704060	+++--++++++?
W	EUR	6	151503727	G	A	rs188016086	CCDC170	0.035369	1.3453	0.043849	1.25936	1.43711	8.80653	1.37e-18	17.8646	0	1		1	128171	+???????????
W	EUR	6	151504999	A	G	rs7753324	CCDC170	0.052831	1.1868	0.020575	1.14647	1.22854	9.70952	2.93e-22	21.533	19.6995	0.049636	0.44161	12	723937	++--+++++++-
W	EUR	6	151505114	C	T	rs7740302	CCDC170	0.185532	1.11359	0.011453	1.09114	1.1365	10.3551	4.26e-25	24.3706	28.0441	0.003187	0.60776	12	723937	+-+++++++++-
W	EUR	6	151505172	A	G	rs75969278	CCDC170	0.036715	1.2259	0.024273	1.17832	1.2754	10.0855	6.86e-24	23.1637	19.7042	0.049566	0.441743	12	723937	++--++++++++
W	EUR	6	151506069	C	T	rs7453575	CCDC170	0.052841	1.18628	0.020564	1.14597	1.228	9.68562	3.7e-22	21.4314	19.7742	0.048535	0.443719	12	723937	++-++++++++-
W	EUR	6	151507636	G	A	rs76969132	CCDC170	0.053448	1.18591	0.020482	1.14576	1.22746	9.70462	3.07e-22	21.5122	18.4888	0.070909	0.405046	12	723937	++-++++++++-
W	EUR	6	151508339	C	T	rs4870022	CCDC170	0.080751	1.15797	0.016868	1.12491	1.19201	9.92426	3.49e-23	22.457	34.8146	0.000266	0.684041	12	723937	+++--++++++-
W	EUR	6	151508352	T	A	rs4870023	CCDC170	0.080782	1.1577	0.016862	1.12465	1.19173	9.90983	4.03e-23	22.3943	35.1509	0.000234	0.687063	12	723937	+++--++++++-
W	EUR	6	151509634	C	T	rs4870024	CCDC170	0.190617	1.11367	0.011512	1.09111	1.1367	10.3095	6.85e-25	24.1644	27.5065	0.002164	0.63645	11	695507	+-+?+++++++-
W	EUR	6	151511876	T	C	rs78588171	CCDC170	0.050333	1.19261	0.021101	1.15125	1.23546	9.78191	1.44e-22	21.8423	20.3641	0.040591	0.459833	12	723937	++--+++++++-
W	EUR	6	151511902	T	C	rs80347787	CCDC170	0.050483	1.19167	0.021031	1.15045	1.23437	9.76329	1.73e-22	21.7625	19.8505	0.047434	0.445858	12	723937	++--+++++++-
W	EUR	6	151514172	T	G	rs117595301	CCDC170	0.053089	1.18382	0.020499	1.14364	1.22541	9.57859	1.05e-21	20.9794	17.9932	0.081737	0.38866	12	723937	++-++++++++-
W	EUR	6	151517110	C	T	rs7759516	CCDC170	0.187607	1.11241	0.011375	1.09012	1.13516	10.3139	6.54e-25	24.1843	26.394	0.005668	0.583239	12	723937	+-+++++++++-
W	EUR	6	151517907	T	C	rs187723820	CCDC170	0.035422	1.3446	0.043798	1.25876	1.4363	8.79672	1.49e-18	17.8267	0	1		1	128171	+???????????
W	EUR	6	151518671	A	G	rs1874415	CCDC170	0.055839	1.17731	0.019761	1.13858	1.21736	9.56385	1.21e-21	20.9175	18.1585	0.077975	0.394223	12	723937	++-++++++++-
W	EUR	6	151519329	T	C	rs139951459	CCDC170	0.055193	1.17558	0.019824	1.13672	1.21576	9.43319	4.23e-21	20.3732	17.7252	0.08818	0.379415	12	723937	++-++++++++-
W	EUR	6	151519441	G	C	rs149746679	CCDC170	0.055187	1.17597	0.01983	1.13711	1.21617	9.45282	3.51e-21	20.4545	17.5275	0.093211	0.372417	12	723937	++-++++++++-
W	EUR	6	151519549	A	G	rs9397422	CCDC170	0.341101	1.08282	0.009353	1.06449	1.10147	9.13417	7e-20	19.1551	13.9178	0.237577	0.209643	12	723937	+++++++-+++-
W	EUR	6	151519926	A	G	rs114137400	CCDC170	0.054466	1.18059	0.020108	1.14118	1.22136	9.58352	1e-21	21.0001	18.7124	0.066455	0.412155	12	723937	++-++++++++-
W	EUR	6	151520459	G	A	rs7775980	CCDC170	0.187196	1.11334	0.011383	1.09103	1.1361	10.3953	2.8e-25	24.5532	25.6252	0.007376	0.570734	12	723937	+-+++++++++-
W	EUR	6	151521725	T	A	rs9371529	CCDC170	0.187154	1.11291	0.01138	1.0906	1.13567	10.3562	4.21e-25	24.3757	25.8393	0.006857	0.574293	12	723937	+-+++++++++-
W	EUR	6	151521781	T	C	rs117027891	CCDC170	0.054481	1.18141	0.020122	1.14197	1.22221	9.62318	6.81e-22	21.1671	18.7279	0.066157	0.41264	12	723937	++-++++++++-
W	EUR	6	151523308	A	T	rs954238	CCDC170	0.186258	1.11333	0.011424	1.09094	1.13618	10.3566	4.19e-25	24.3775	26.8374	0.004862	0.590124	12	723937	+-+++++++++-
W	EUR	6	151523448	A	G	rs2001574	CCDC170	0.054694	1.18257	0.020117	1.14314	1.22336	9.69236	3.47e-22	21.46	19.8633	0.047252	0.446214	12	723937	++-++++++++-
W	EUR	6	151523515	A	G	rs2001575	CCDC170	0.054918	1.1817	0.020094	1.14232	1.22245	9.65404	5.04e-22	21.2975	20.272	0.041748	0.457379	12	723937	++-++++++++-
W	EUR	6	151524443	C	T	rs7763324	CCDC170	0.343161	1.07983	0.009379	1.06144	1.09853	8.7667	1.95e-18	17.7108	12.1211	0.277033	0.174993	11	714850	++?++++-+++-
W	EUR	6	151534608	G	A	rs9383580	CCDC170	0.02186	1.17046	0.026827	1.11788	1.22552	6.71178	1.99e-11	10.7006	7.92028	0.339676	0.116193	8	599414	+?+?-+?-?+-+
W	EUR	6	151555133	T	C	rs147717277	CCDC170	0.021826	1.16616	0.02682	1.1136	1.22121	6.53207	6.71e-11	10.1733	10.0211	0.123768	0.401261	7	590327	+???-+?-?+-+
W	EUR	6	151590159	G	A	rs189351379	CCDC170	0.016813	1.35618	0.067275	1.22432	1.50224	5.83807	5.42e-09	8.26568	0	1		1	128171	+???????????
W	EUR	6	151591492	C	A	rs144234957	CCDC170	0.016831	1.22106	0.032741	1.15689	1.2888	7.25113	4.31e-13	12.3659	16.113	0.040791	0.503506	9	670311	++??++?--+-+
W	EUR	6	151600388	T	C	rs79388282	CCDC170	0.039168	1.13267	0.021437	1.09065	1.17631	6.4595	1.09e-10	9.96426	42.7715	1.19e-05	0.74282	12	723937	++-+++-+--++
W	EUR	6	151621492	C	T	rs116893412	CCDC170/LOC124901435	0.037615	1.14346	0.021972	1.1004	1.18821	6.84463	7.96e-12	11.0993	39.3028	4.71e-05	0.720121	12	723937	++-++--+--++
W	EUR	6	151679794	T	G	rs77898745	ESR1	0.027448	1.17002	0.025805	1.11944	1.22288	6.96441	3.43e-12	11.4652	34.0989	0.000348	0.677409	12	723937	++-++--+---+
W	EUR	6	151684094	C	A	rs75134544	ESR1	0.027534	1.1701	0.025771	1.11959	1.22289	6.9777	3.12e-12	11.5062	33.7125	0.000403	0.673711	12	723937	++-++--+---+
W	EUR	6	151687645	T	C	rs3020331	ESR1	0.431135	1.06843	0.009052	1.05069	1.08648	7.74788	9.78e-15	14.0095	18.2297	0.0326	0.506301	10	694973	++?-+++++-+?
W	EUR	6	151687789	T	C	rs3020332	ESR1	0.45119	1.06323	0.008957	1.04567	1.08108	7.2171	5.53e-13	12.2572	25.5393	0.002429	0.647602	10	694973	++?-+++++-+?
W	EUR	6	151687847	A	G	rs2941741	ESR1	0.424208	1.07439	0.009094	1.05657	1.09252	8.40686	4.44e-17	16.3527	24.4015	0.00371	0.63117	10	694973	++?-+++++-+?
W	EUR	6	151688503	G	A	rs2941740	ESR1	0.414491	1.07662	0.009174	1.05864	1.0949	8.59156	9.06e-18	17.0429	22.2475	0.013892	0.550511	11	704060	+++++++++-+?
W	EUR	6	151689119	G	A	rs3020333	ESR1	0.452369	1.06316	0.008904	1.04571	1.08091	7.25307	4.25e-13	12.3721	24.9226	0.005494	0.598758	11	704060	+++-+++++-+?
W	EUR	6	151689399	C	T	rs2982573	ESR1	0.424633	1.07387	0.009035	1.05616	1.09188	8.40063	4.68e-17	16.3297	24.6301	0.006093	0.593992	11	704060	+++-+++++-+?
W	EUR	6	151689426	T	C	rs2982572	ESR1	0.42456	1.07391	0.009036	1.0562	1.09192	8.40538	4.5e-17	16.3473	24.5603	0.006244	0.59284	11	704060	+++-+++++-+?
W	EUR	6	151691604	T	A	rs2982571	ESR1	0.423673	1.0705	0.008866	1.05312	1.08816	8.15897	3.55e-16	15.4494	28.5857	0.002631	0.615192	12	723937	+++-+++++-++
W	EUR	6	151691821	G	A	rs3020334	ESR1	0.430858	1.07522	0.009175	1.05723	1.09351	8.42724	3.73e-17	16.4281	24.2738	0.003889	0.62923	10	675630	+++?+++++-+?
W	EUR	6	151691853	G	A	rs2941742	ESR1	0.423568	1.07082	0.008868	1.05344	1.08849	8.19477	2.64e-16	15.5783	28.3744	0.002836	0.612327	12	723937	+++-+++++-++
W	EUR	6	151692088	T	G	rs3020335	ESR1	0.423559	1.07091	0.008869	1.05353	1.08858	8.20529	2.42e-16	15.6162	28.281	0.002931	0.611046	12	723937	+++-+++++-++
W	EUR	6	151692613	T	C	rs2982570	ESR1	0.423968	1.07202	0.009021	1.05434	1.09	8.19585	2.62e-16	15.5822	27.8802	0.001887	0.641322	11	704060	+++-+++++-+?
W	EUR	6	151692625	T	G	rs3020336	ESR1	0.423941	1.07208	0.009021	1.0544	1.09006	8.20355	2.46e-16	15.6099	27.8199	0.001929	0.640545	11	704060	+++-+++++-+?
W	EUR	6	151693125	C	T	rs113470730	ESR1	0.018038	1.23858	0.032327	1.17522	1.30536	7.98616	1.46e-15	14.8353	14.7392	0.011537	0.660768	6	570450	+???--?+?+-?
W	EUR	6	151693669	C	G	rs2941739	ESR1	0.445591	1.05961	0.008748	1.04247	1.07704	6.95667	3.62e-12	11.4414	31.3236	0.000978	0.648827	12	723937	+++-+++++-+-
W	EUR	6	151695234	T	A	rs862346	ESR1	0.425935	1.0604	0.008792	1.04317	1.07792	7.0166	2.36e-12	11.6265	30.0155	0.001576	0.633523	12	723937	+++-++-++-+-
W	EUR	6	151695668	T	C	rs851996	ESR1	0.426102	1.06261	0.008949	1.04507	1.08044	7.1509	8.97e-13	12.047	28.1964	0.001679	0.645345	11	704060	+++-++-++-+?
W	EUR	6	151696556	G	T	rs1293936	ESR1	0.436164	1.0637	0.008813	1.04643	1.08126	7.39291	1.5e-13	12.8242	31.3523	0.000968	0.649148	12	723937	+++-++-++-+-
W	EUR	6	151696823	G	C	rs1293935	ESR1	0.426444	1.06032	0.00879	1.0431	1.07784	7.00812	2.51e-12	11.6002	27.8374	0.003428	0.604848	12	723937	+++-++-++-+-
W	EUR	6	151699255	C	A	rs851985	ESR1	0.399857	1.07225	0.009089	1.05443	1.09036	8.16043	3.51e-16	15.4547	30.3844	0.000741	0.670884	11	704060	+++-++-++-+?
W	EUR	6	151702056	A	G	rs851984	ESR1	0.397573	1.07187	0.008952	1.05433	1.08971	8.2423	1.78e-16	15.7501	30.5855	0.001281	0.640353	12	723937	+++-++-++-++
W	EUR	6	151703280	G	A	rs851983	ESR1	0.388929	1.07458	0.009083	1.05677	1.09268	8.4384	3.39e-17	16.4695	29.0962	0.002193	0.621944	12	723937	++++++-++-++
W	EUR	6	151703850	C	T	rs851982	ESR1	0.398076	1.07258	0.009098	1.05474	1.09071	8.19057	2.73e-16	15.5631	30.2525	0.000779	0.669449	11	704060	+++-++-++-+?
W	EUR	6	151705939	T	A	rs851981	ESR1	0.263446	1.07709	0.009873	1.05774	1.0968	8.02948	1.03e-15	14.988	25.2692	0.008324	0.564687	12	723937	+++-+++++-++
W	EUR	6	151706820	C	T	rs851980	ESR1	0.264054	1.07696	0.00986	1.05764	1.09664	8.02537	1.06e-15	14.9735	25.3922	0.007984	0.566797	12	723937	+++-+++++-++
W	EUR	6	151708421	T	G	rs851978	ESR1	0.282299	1.05894	0.009514	1.04029	1.07792	6.31781	2.74e-10	9.56255	28.0571	0.003173	0.607943	12	723937	++--+++++---
W	EUR	6	151708473	C	T	rs851977	ESR1	0.284468	1.06021	0.009515	1.04157	1.0792	6.45773	1.1e-10	9.9592	26.6928	0.005112	0.587905	12	723937	++--+++++--+
W	EUR	6	151708873	C	T	rs851976	ESR1	0.284402	1.05995	0.009512	1.04131	1.07893	6.43086	1.31e-10	9.88237	26.8122	0.004905	0.589739	12	723937	++--+++++--+
W	EUR	6	151710168	T	C	rs851975	ESR1	0.254641	1.07678	0.009935	1.05731	1.09661	7.94501	2.04e-15	14.6909	26.0908	0.006291	0.578395	12	723937	+++-+++++-++
W	EUR	6	151711782	T	C	rs1101081	ESR1	0.283129	1.0623	0.009678	1.04333	1.08161	6.57392	5.07e-11	10.2949	24.91	0.005519	0.598555	11	704060	+++-+++++-+?
W	EUR	6	151712508	T	G	rs1101080	ESR1	0.283635	1.06082	0.009518	1.04216	1.0798	6.52165	7.19e-11	10.1432	26.4198	0.005618	0.583645	12	723937	+++-+++++--+
W	EUR	6	151712927	A	G	rs3020338	ESR1	0.255225	1.07691	0.009926	1.05745	1.09672	7.96594	1.72e-15	14.7643	26.1224	0.006223	0.578906	12	723937	+++-+++++-++
W	EUR	6	151713251	T	C	rs7455028	ESR1	0.280614	1.06061	0.009543	1.0419	1.07964	6.48177	9.37e-11	10.0282	28.2641	0.002949	0.610814	12	723937	++--+++++-+-
W	EUR	6	151713489	A	G	rs13216081	ESR1	0.255248	1.07684	0.009924	1.05739	1.09665	7.96022	1.8e-15	14.7442	26.0871	0.006299	0.578335	12	723937	+++-+++++-++
W	EUR	6	151713623	T	C	rs13216104	ESR1	0.255229	1.07707	0.009926	1.05761	1.09689	7.98303	1.5e-15	14.8243	25.9187	0.006673	0.575596	12	723937	+++-+++++-++
W	EUR	6	151713685	C	T	rs13201871	ESR1	0.255263	1.07681	0.009924	1.05736	1.09662	7.95745	1.84e-15	14.7345	26.1964	0.006067	0.580094	12	723937	+++-+++++-++
W	EUR	6	151716421	T	C	rs2206949	ESR1	0.281871	1.06457	0.009927	1.04511	1.08439	6.64813	3.07e-11	10.5123	21.496	0.010621	0.581317	10	645497	+++-?++++?-+
W	EUR	6	151716422	A	T	rs2206948	ESR1	0.253511	1.08201	0.010416	1.0616	1.10282	8.11045	5.3e-16	15.2757	20.5135	0.008559	0.610012	9	636410	++?-?++++?++
W	EUR	6	151717105	A	G	rs6932703	ESR1	0.255222	1.07693	0.009924	1.05748	1.09674	7.97026	1.66e-15	14.7794	25.9629	0.006573	0.576318	12	723937	+++-+++++-++
W	EUR	6	151718829	C	T	rs10872678	ESR1	0.283733	1.06048	0.009512	1.04184	1.07946	6.48925	8.92e-11	10.0497	26.6311	0.005223	0.586948	12	723937	++--+++++--+
W	EUR	6	151718990	G	A	rs12526447	ESR1	0.256618	1.07671	0.009915	1.05727	1.0965	7.95347	1.9e-15	14.7206	26.3117	0.005831	0.581935	12	723937	+++-+++++-++
W	EUR	6	151719156	C	T	rs12525163	ESR1	0.281322	1.06052	0.009527	1.04185	1.07953	6.48396	9.24e-11	10.0345	28.4022	0.002808	0.612706	12	723937	++--+++++---
W	EUR	6	151719480	A	G	rs3020339	ESR1	0.255208	1.07697	0.009924	1.05752	1.09678	7.97411	1.61e-15	14.7929	25.8654	0.006796	0.574722	12	723937	+++-+++++-++
W	EUR	6	151719742	G	T	rs75212262	ESR1	0.024376	1.17393	0.025176	1.12458	1.22544	7.3188	2.61e-13	12.5836	15.7347	0.107482	0.364463	11	695507	+++?--++-+--
W	EUR	6	151721125	A	C	rs10484921	ESR1	0.261053	1.07798	0.010025	1.05833	1.09799	8.00022	1.3e-15	14.8848	25.2726	0.004852	0.604315	11	695507	+++?+++++-++
W	EUR	6	151721278	T	A	rs11756568	ESR1	0.283269	1.0613	0.009526	1.04262	1.0803	6.56952	5.22e-11	10.2821	27.3086	0.004127	0.597196	12	723937	++--+++++--+
W	EUR	6	151721367	C	A	rs7772579	ESR1	0.286047	1.06155	0.00964	1.04266	1.08079	6.51914	7.31e-11	10.1359	25.9032	0.003873	0.613947	11	704060	++--+++++--?
W	EUR	6	151722155	G	A	rs3020340	ESR1	0.28492	1.06053	0.009502	1.0419	1.07949	6.50106	8.25e-11	10.0837	26.6627	0.005166	0.587439	12	723937	++--+++++--+
W	EUR	6	151722972	C	T	rs11755191	ESR1	0.02303	1.17196	0.025776	1.12144	1.22476	7.05776	1.76e-12	11.7546	10.8877	0.283483	0.173381	10	694973	++?+--++++-?
W	EUR	6	151723737	T	A	rs7749650	ESR1	0.283359	1.06003	0.009514	1.04138	1.07901	6.43771	1.25e-10	9.90194	26.4155	0.005626	0.583577	12	723937	+++-+++++--+
W	EUR	6	151723749	G	A	rs7749659	ESR1	0.255244	1.0757	0.009914	1.05627	1.09549	7.84558	4.52e-15	14.3451	27.6014	0.003725	0.60147	12	723937	+++-+++++-++
W	EUR	6	151725226	G	A	rs148375951	ESR1	0.017716	1.2307	0.031966	1.16805	1.29671	7.78673	7.2e-15	14.1425	14.3412	0.026049	0.581624	7	590327	+???--?+?++-
W	EUR	6	151726341	G	T	rs6940919	ESR1	0.248227	1.08098	0.010422	1.06055	1.1018	8.00012	1.3e-15	14.8844	20.7801	0.013663	0.566894	10	645497	+++-?++++?++
W	EUR	6	151726422	C	G	rs3020341	ESR1	0.275928	1.06373	0.009986	1.04416	1.08367	6.52055	7.24e-11	10.14	23.9306	0.004412	0.623912	10	645497	++--?++++?+-
W	EUR	6	151726618	G	A	rs3020342	ESR1	0.277623	1.05777	0.009544	1.03906	1.07681	6.16936	7.07e-10	9.15083	29.0795	0.002206	0.621727	12	723937	++--+++++---
W	EUR	6	151726887	T	C	rs1159327	ESR1	0.270533	1.05968	0.009664	1.04074	1.07897	6.29898	3.09e-10	9.5098	27.3586	0.004055	0.597933	12	723937	+++-+++++-+-
W	EUR	6	151728707	G	C	rs537818284	ESR1	0.04525	1.27055	0.037456	1.19714	1.34847	7.88547	3.29e-15	14.4834	0	1		1	128171	+???????????
W	EUR	6	151729388	C	G	rs35240111	ESR1	0.275656	1.05853	0.009576	1.03976	1.07763	6.23102	4.78e-10	9.32071	28.2551	0.002958	0.610689	12	723937	++--+++++-+-
W	EUR	6	151730908	A	G	rs6899458	ESR1	0.242836	1.05405	0.009904	1.03464	1.07383	5.55057	2.92e-08	7.53516	29.6167	0.00182	0.628587	12	723937	++--+++++---
W	EUR	6	151731080	G	A	rs2982564	ESR1	0.244039	1.05756	0.010079	1.03781	1.0777	5.81723	6.14e-09	8.21154	25.8036	0.004013	0.612458	11	704060	++--+++++-+?
W	EUR	6	151731517	T	C	rs2982561	ESR1	0.538354	1.05212	0.008792	1.03488	1.06964	6.02944	1.69e-09	8.7713	25.268	0.008328	0.564666	12	723937	+++--+--+-++
W	EUR	6	151734843	T	A	rs6904031	ESR1	0.070292	1.13396	0.016689	1.10124	1.16764	8.41763	4.05e-17	16.3926	17.5947	0.091474	0.374812	12	723937	++++++++++++
W	EUR	6	151734915	A	C	rs11155808	ESR1	0.577431	1.0512	0.009485	1.03261	1.07012	5.48455	4.24e-08	7.37233	18.7014	0.016541	0.572224	9	625620	++--?+--+?+?
W	EUR	6	151734918	A	C	rs62442016	ESR1	0.577429	1.05131	0.009486	1.03272	1.07024	5.49644	3.97e-08	7.40152	18.6656	0.016754	0.571404	9	625620	++--?+--+?+?
W	EUR	6	151735011	G	A	rs2982558	ESR1	0.551294	1.05309	0.008846	1.03575	1.07072	6.10757	1.04e-09	8.98219	22.5785	0.020256	0.51281	12	723937	++-+++--+-++
W	EUR	6	151735707	A	G	rs2982556	ESR1	0.551291	1.05326	0.008843	1.03593	1.07089	6.12979	9.06e-10	9.04265	22.8696	0.018439	0.519012	12	723937	++--++--+-++
W	EUR	6	151737709	A	T	rs3020300	ESR1	0.550345	1.0525	0.008842	1.03517	1.07012	6.04017	1.58e-09	8.80012	25.0058	0.009099	0.560101	12	723937	++--++--+-++
W	EUR	6	151738428	A	G	rs2982552	ESR1	0.536003	1.05662	0.009173	1.03864	1.0749	6.28959	3.28e-10	9.48357	21.7011	0.016702	0.539194	11	704060	++--++--+++?
W	EUR	6	151740075	T	G	rs2982551	ESR1	0.551359	1.052	0.00884	1.03467	1.06961	5.98293	2.25e-09	8.64698	23.9252	0.013052	0.540233	12	723937	++--++--+++-
W	EUR	6	151740339	T	G	rs2982550	ESR1	0.553994	1.05725	0.00953	1.03857	1.07626	6.1209	9.58e-10	9.01843	21.4607	0.018101	0.534031	11	584345	++--++--++?-
W	EUR	6	151740444	C	T	rs3020301	ESR1	0.552332	1.05324	0.008856	1.03588	1.07089	6.11826	9.74e-10	9.01126	22.5341	0.020547	0.51185	12	723937	++--++--+++-
W	EUR	6	151743220	A	G	rs1999806	ESR1	0.543411	1.04726	0.008722	1.03016	1.06464	5.49895	3.91e-08	7.4077	16.638	0.119049	0.338863	12	723937	++--++--+++-
W	EUR	6	151743329	T	C	rs3020304	ESR1	0.542629	1.04951	0.008884	1.0321	1.06722	5.66133	1.54e-08	7.81245	15.7033	0.108447	0.36319	11	704060	++--++--+++?
W	EUR	6	151744751	T	C	rs3020306	ESR1	0.544997	1.04726	0.008734	1.03014	1.06466	5.49157	4.08e-08	7.38956	15.3749	0.16597	0.284547	12	723937	++--++--+++-
W	EUR	6	151749793	A	G	rs1361024	ESR1	0.0779	1.12039	0.016172	1.08869	1.15301	7.76343	8.66e-15	14.0626	17.9078	0.036259	0.497425	10	694973	++?++++++++?
W	EUR	6	151751583	T	G	rs9918437	ESR1	0.078627	1.11199	0.015797	1.08103	1.14384	7.36763	1.81e-13	12.7419	20.9788	0.021242	0.523329	11	714850	++?++++++++-
W	EUR	6	151759387	A	C	rs147867792	ESR1	0.017092	1.22576	0.032093	1.16286	1.29207	7.57374	3.79e-14	13.4213	13.7407	0.032671	0.563341	7	590327	+???--?+?+-+
W	EUR	6	151763727	C	T	rs2504071	ESR1	0.565082	1.04836	0.008812	1.03109	1.06592	5.57194	2.58e-08	7.58826	16.4425	0.087647	0.39182	11	714850	++?-++-++++-
W	EUR	6	151774694	C	G	rs2504066	ESR1	0.488839	1.04885	0.008982	1.03125	1.06676	5.52273	3.42e-08	7.46626	9.64173	0.38026	0.0665574	10	698741	++?+++?-+++-
W	EUR	6	151804193	C	A	rs190029824	ESR1	0.039744	1.30865	0.040888	1.22851	1.39402	8.3431	7.62e-17	16.1179	0	1		1	128171	+???????????
W	EUR	6	151940169	A	G	rs150722294	ESR1	0.042055	1.28877	0.039563	1.21122	1.37128	8.01262	1.18e-15	14.9285	0	1		1	128171	+???????????
W	EUR	6	152081905	A	C	rs192794273	ESR1	0.039568	1.31859	0.041672	1.23692	1.40566	8.4773	2.43e-17	16.6142	0	1		1	128171	+???????????
W	EUR	6	152101993	C	T	rs9341077	ESR1	0.036637	0.864126	0.019134	0.826623	0.903329	-6.4512	1.15e-10	9.94049	18.3945	0.072866	0.401996	12	723937	--+-+-------
W	EUR	6	152105298	T	G	rs73625113	ESR1	0.036243	0.861481	0.019432	0.823394	0.90133	-6.46282	1.06e-10	9.97377	15.5277	0.113976	0.355988	11	704060	----+------?
W	EUR	6	152114508	A	G	rs73625120	ESR1	0.037388	0.861612	0.018728	0.824906	0.899951	-6.70584	2.07e-11	10.683	14.9006	0.187093	0.261775	12	723937	----+-------
W	EUR	6	152114619	T	C	rs113766362	ESR1	0.03735	0.86019	0.018694	0.82355	0.89846	-6.78122	1.24e-11	10.9081	14.887	0.187728	0.261101	12	723937	----+-------
W	EUR	6	152120708	T	C	rs73625127	ESR1	0.037307	0.860717	0.019039	0.823401	0.899725	-6.6326	3.41e-11	10.4666	12.288	0.266242	0.1862	11	704060	----+------?
W	EUR	6	152128660	A	G	rs73625130	ESR1	0.037786	0.863765	0.018623	0.827264	0.901877	-6.6482	3.07e-11	10.5125	14.0533	0.230057	0.217267	12	723937	----+-------
W	EUR	6	152128716	T	C	rs73625131	ESR1	0.037747	0.86143	0.018897	0.824391	0.900133	-6.65221	2.99e-11	10.5243	14.1861	0.16467	0.295085	11	704060	----+------?
W	EUR	6	152128859	T	G	rs111610638	ESR1	0.037894	0.863972	0.018606	0.827503	0.902048	-6.64501	3.14e-11	10.5031	14.2485	0.219547	0.227989	12	723937	----+-------
W	EUR	6	152130070	A	G	rs147631975	SYNE1	0.036406	0.860452	0.019234	0.822754	0.899877	-6.57548	5.02e-11	10.2994	14.6706	0.144541	0.318364	11	704060	----+------?
W	EUR	6	152130511	T	C	rs58450883	SYNE1	0.03814	0.864637	0.018573	0.828234	0.902639	-6.62755	3.53e-11	10.4518	15.3923	0.165231	0.285358	12	723937	----+-------
W	EUR	6	152131971	T	G	rs73625140	SYNE1	0.039462	0.869727	0.018751	0.832975	0.908102	-6.33603	2.43e-10	9.61373	15.6108	0.111328	0.359419	11	695507	---?+-------
W	EUR	6	152134618	C	T	rs111633949	SYNE1	0.038055	0.864419	0.018642	0.82788	0.90257	-6.61202	3.92e-11	10.4062	15.8366	0.147307	0.305406	12	723937	----+------+
W	EUR	6	152137855	A	G	rs112578997	SYNE1	0.037852	0.866327	0.018715	0.829645	0.90463	-6.50069	8.27e-11	10.0827	16.5179	0.122968	0.334055	12	723937	----+------+
W	EUR	6	152140568	T	C	rs111550108	SYNE1	0.037832	0.859475	0.018905	0.822422	0.898197	-6.73527	1.7e-11	10.7706	14.443	0.153727	0.307623	11	704060	----+------?
W	EUR	6	152149158	C	T	rs17082233	SYNE1	0.048067	0.892294	0.017388	0.858214	0.927727	-5.73571	9.96e-09	8.00156	14.7393	0.194743	0.253698	12	723937	-----------+
W	EUR	6	152149617	A	C	rs17082236	SYNE1	0.049481	0.895224	0.017497	0.860931	0.930884	-5.55381	2.86e-08	7.5432	15.039	0.130646	0.335063	11	695507	---?-------+
W	EUR	6	152149912	C	T	rs73625169	SYNE1	0.038559	0.864387	0.018844	0.827453	0.902971	-6.54098	6.32e-11	10.1991	16.3654	0.08964	0.388954	11	695507	---?--------
W	EUR	6	152150453	T	C	rs73632499	SYNE1	0.047895	0.88656	0.017619	0.852026	0.922493	-5.93982	2.93e-09	8.53259	13.13	0.216491	0.238388	11	704060	-----------?
W	EUR	6	152150777	A	G	rs7743748	SYNE1	0.047953	0.885752	0.017615	0.851227	0.921677	-5.9808	2.28e-09	8.64131	12.8943	0.229643	0.224462	11	704060	-----------?
W	EUR	6	152151075	C	T	rs2103809	SYNE1	0.042312	0.87491	0.017886	0.839854	0.91143	-6.40498	1.55e-10	9.80867	12.4214	0.332818	0.114429	12	723937	-----------+
W	EUR	6	152151149	C	G	rs2092753	SYNE1	0.042292	0.875264	0.017896	0.840188	0.911804	-6.38464	1.77e-10	9.75095	12.5243	0.325552	0.121704	12	723937	-----------+
W	EUR	6	152151496	G	A	rs2881823	SYNE1	0.038706	0.869328	0.018402	0.833261	0.906957	-6.47729	9.65e-11	10.0153	11.0769	0.436843	0.00694273	12	723937	------------
W	EUR	6	152151525	A	T	rs2348080	SYNE1	0.042311	0.87496	0.017891	0.839894	0.911489	-6.40097	1.59e-10	9.79728	12.419	0.332985	0.114261	12	723937	-----------+
W	EUR	6	152152046	C	T	rs910415	SYNE1	0.042282	0.870385	0.018117	0.834876	0.907405	-6.53215	6.71e-11	10.1736	10.706	0.380878	0.0659434	11	704060	-----------?
W	EUR	6	152155209	G	T	rs73633307	SYNE1	0.042666	0.876185	0.01828	0.840356	0.913541	-6.20504	5.64e-10	9.24892	12.5507	0.249886	0.203234	11	714850	--?---------
W	EUR	6	152183739	T	A	rs2813511	SYNE1	0.509735	0.954563	0.008014	0.938855	0.970534	-5.49301	4.04e-08	7.39309	24.6568	0.010231	0.553875	12	723937	----+---++--
W	EUR	6	152188030	C	T	rs79703198	SYNE1	0.013861	1.29088	0.038554	1.21531	1.37114	8.29592	1.13e-16	15.9452	2.2134	0.529313	0	4	518047	+??-?+????+?
W	EUR	6	152188819	G	A	rs7740884	SYNE1	0.369366	0.951945	0.00847	0.935343	0.96884	-5.48663	4.19e-08	7.37743	26.0673	0.001992	0.65474	10	645497	-+-+?-+-+?--
W	EUR	6	152188850	C	T	rs7745102	SYNE1	0.370415	0.950703	0.008602	0.933843	0.967867	-5.53752	3.14e-08	7.50282	25.7799	0.001145	0.68968	9	625620	-+-+?-+-+?-?
W	EUR	6	152192561	T	A	rs2813530	SYNE1	0.479031	0.952727	0.007934	0.937176	0.968536	-5.76739	8.26e-09	8.08284	25.2789	0.004841	0.604414	11	714850	--?-+-+-++--
W	EUR	6	152194901	C	T	rs2635461	SYNE1	0.08234	1.08112	0.014497	1.05271	1.1103	5.74003	9.71e-09	8.01263	5.1569	0.92333	0	12	723937	++--++++++++
W	EUR	6	152197884	A	G	rs2635464	SYNE1	0.08204	1.08401	0.014573	1.05545	1.11334	5.92107	3.29e-09	8.48307	5.4302	0.908558	0	12	723937	++--++++-+++
W	EUR	6	152202601	C	G	rs77483076	SYNE1	0.039692	1.1713	0.020841	1.13045	1.21362	8.73014	2.69e-18	17.5703	24.8525	0.009581	0.557389	12	723937	+--++++--+++
W	EUR	6	152209472	A	G	rs74438331	SYNE1	0.033871	1.13243	0.022225	1.08887	1.17774	6.21416	5.32e-10	9.2741	14.49	0.151789	0.309871	11	704060	+++---+++-+?
W	EUR	6	152210675	A	G	rs9479263	SYNE1	0.03423	1.13443	0.022208	1.0909	1.17969	6.31843	2.73e-10	9.56429	12.1283	0.276563	0.175481	11	695507	+++?-++++-+-
W	EUR	6	152211087	A	G	rs2763028	SYNE1	0.777314	0.946188	0.009456	0.927654	0.965093	-5.48036	4.34e-08	7.36206	17.7882	0.058643	0.43783	11	714850	--?+----+--+
W	EUR	6	152212404	C	T	rs117156394	SYNE1	0.040733	1.3044	0.04052	1.22498	1.38897	8.29171	1.18e-16	15.9298	0	1		1	128171	+???????????
W	EUR	6	152214208	G	A	rs117117535	SYNE1	0.03663	1.13535	0.022622	1.09101	1.18149	6.24549	4.36e-10	9.36081	12.9093	0.115007	0.380294	9	625620	+++-?+-++?+?
W	EUR	6	152217850	C	T	rs73781102	SYNE1	0.083642	0.86255	0.013395	0.836295	0.889629	-9.37537	7.33e-21	20.1347	22.7869	0.011561	0.561151	11	704060	-----------?
W	EUR	6	152218896	C	T	rs78900103	SYNE1	0.08444	0.863742	0.013537	0.83721	0.891115	-9.20221	3.72e-20	19.4289	21.769	0.009641	0.586567	10	675630	---?-------?
W	EUR	6	152219222	C	T	rs17195304	SYNE1	0.083105	0.86393	0.013176	0.838105	0.890551	-9.44628	3.74e-21	20.4274	22.5991	0.020122	0.513254	12	723937	------------
W	EUR	6	152222814	T	C	rs4870084	SYNE1	0.192475	0.914438	0.009644	0.895536	0.933738	-8.39353	4.97e-17	16.3035	19.7944	0.031259	0.494806	11	704060	-----------?
W	EUR	6	152224036	T	A	rs7741405	SYNE1	0.245998	1.08278	0.010318	1.06256	1.10339	8.26873	1.43e-16	15.8461	31.0985	0.001063	0.646285	12	723937	++-+++++-+++
W	EUR	6	152224730	C	T	rs17082358	SYNE1	0.196422	1.09878	0.011145	1.07693	1.12107	9.19435	4.01e-20	19.3972	29.9889	0.001591	0.633198	12	723937	++-++++++++-
W	EUR	6	152226892	G	T	rs17803505	SYNE1	0.082923	0.858235	0.013243	0.832278	0.885002	-9.75652	1.85e-22	21.7335	20.9266	0.021611	0.522139	11	704060	-----------?
W	EUR	6	152226916	A	C	rs9479272	SYNE1	0.221214	0.915441	0.009126	0.897554	0.933686	-8.77518	1.8e-18	17.7435	20.5031	0.024838	0.512268	11	704060	-----------?
W	EUR	6	152228174	T	C	rs13206305	SYNE1	0.19753	1.10203	0.011315	1.07985	1.12466	9.36697	7.94e-21	20.1001	27.1627	0.002454	0.631849	11	704060	++-++++++++?
W	EUR	6	152231032	A	G	rs73005444	SYNE1	0.22124	0.915114	0.008981	0.897511	0.933062	-8.9513	3.72e-19	18.4291	20.6393	0.037306	0.467037	12	723937	------------
W	EUR	6	152232583	T	A	rs17803970	SYNE1	0.082495	0.858941	0.01307	0.833324	0.885344	-9.84339	7.82e-23	22.1067	22.0559	0.023944	0.501267	12	723937	------------
W	EUR	6	152232879	G	C	rs71575922	SYNE1	0.159711	1.12315	0.012279	1.09908	1.14774	10.5089	8.45e-26	25.073	37.2509	0.000105	0.704705	12	723937	++-+++++++++
W	EUR	6	152233261	T	C	rs12110479	SYNE1	0.195465	1.09401	0.011084	1.07229	1.11618	8.78074	1.72e-18	17.765	30.6415	0.001255	0.64101	12	723937	++-++++++++-
W	EUR	6	152233602	A	G	rs35764603	SYNE1	0.195434	1.09429	0.011085	1.07256	1.11645	8.80613	1.37e-18	17.8631	30.9727	0.001113	0.644849	12	723937	++-++++++++-
W	EUR	6	152233977	T	C	rs2296254	SYNE1	0.213424	0.91628	0.009239	0.898171	0.934753	-8.58536	9.56e-18	17.0195	17.7788	0.058812	0.437531	11	704060	---+-------?
W	EUR	6	152234298	G	C	rs9383979	SYNE1	0.499436	0.953979	0.008037	0.938227	0.969996	-5.546	2.99e-08	7.52383	9.25783	0.507822	0	11	704060	-----------?
W	EUR	6	152234313	A	G	rs35194179	SYNE1	0.499461	0.952332	0.008271	0.936121	0.968824	-5.57561	2.53e-08	7.59739	6.89103	0.548434	0	9	636410	--?-?----?--
W	EUR	6	152235123	C	T	rs12110523	SYNE1	0.195237	1.0966	0.011114	1.07482	1.11883	9.00786	2.23e-19	18.6521	29.2923	0.002044	0.624475	12	723937	++-+++++-+++
W	EUR	6	152235391	T	C	rs12111427	SYNE1	0.202166	1.12029	0.011092	1.09855	1.14246	11.3609	7.09e-30	29.1495	44.0173	7.22e-06	0.750098	12	723937	++-+++++-+++
W	EUR	6	152235465	A	G	rs35429109	SYNE1	0.202097	1.12033	0.011094	1.09858	1.1425	11.362	7e-30	29.1547	44.5345	5.86e-06	0.753	12	723937	++-+++++-+++
W	EUR	6	152237062	A	G	rs11751190	SYNE1	0.202359	1.11978	0.011079	1.09807	1.14193	11.3231	1.09e-29	28.962	43.3989	9.25e-06	0.746537	12	723937	++-+++++-+++
W	EUR	6	152237417	T	C	rs13192494	SYNE1	0.201844	1.12051	0.011099	1.09875	1.14269	11.375	6.03e-30	29.2194	44.6151	5.67e-06	0.753447	12	723937	++-+++++-+++
W	EUR	6	152237488	A	T	rs6927162	SYNE1	0.441219	0.940858	0.007855	0.925463	0.95651	-7.24206	4.6e-13	12.3369	21.6682	0.016887	0.538495	11	714850	--?+-----+--
W	EUR	6	152239781	A	G	rs9479275	SYNE1	0.269291	0.918602	0.008569	0.901808	0.935709	-9.01848	2.02e-19	18.6942	22.4677	0.02099	0.510408	12	723937	------------
W	EUR	6	152240213	A	C	rs9371245	SYNE1	0.615577	1.07138	0.009424	1.05291	1.09017	7.77053	8.19e-15	14.0869	31.436	0.000939	0.650083	12	723937	++++++++-++-
W	EUR	6	152240602	A	G	rs9322364	SYNE1	0.623068	1.06788	0.009426	1.04941	1.08668	7.3767	1.69e-13	12.7714	30.4805	0.001331	0.639113	12	723937	++++++++-++-
W	EUR	6	152241136	G	C	rs58415480	SYNE1	0.165544	1.15037	0.012186	1.12649	1.17476	13.087	4.29e-39	38.3675	52.4064	2.3e-07	0.790102	12	723937	++-+++++++++
W	EUR	6	152241830	A	G	rs13210209	SYNE1	0.450992	1.08259	0.009224	1.06451	1.10098	9.23585	2.72e-20	19.565	47.0028	3.92e-07	0.808522	10	694973	++?+++++-++?
W	EUR	6	152241832	C	T	rs13195723	SYNE1	0.459639	1.08613	0.00918	1.06814	1.10443	9.69417	3.41e-22	21.4677	47.0967	3.77e-07	0.808904	10	694973	++?+++++-++?
W	EUR	6	152243010	G	A	rs4869758	SYNE1	0.572147	1.0678	0.009268	1.04963	1.08628	7.49331	7.01e-14	13.154	27.4939	0.003868	0.599911	12	723937	+--++++++++-
W	EUR	6	152243617	A	G	rs74636305	SYNE1	0.073672	0.854349	0.013717	0.827463	0.882108	-9.64931	5.28e-22	21.2775	15.4622	0.162301	0.288586	12	723937	------------
W	EUR	6	152243859	C	G	rs17082381	SYNE1	0.073544	0.85523	0.013734	0.828312	0.883022	-9.58438	9.91e-22	21.0037	16.0181	0.140459	0.313279	12	723937	------------
W	EUR	6	152244762	C	T	rs3888239	SYNE1	0.579425	1.07126	0.009653	1.05234	1.09052	7.57143	3.86e-14	13.4136	24.1583	0.004058	0.627457	10	675630	+--?+++++++?
W	EUR	6	152245912	C	T	rs6901631	SYNE1	0.126969	0.89231	0.01192	0.868947	0.916301	-8.41752	4.05e-17	16.3922	18.5324	0.029475	0.514365	10	675630	---?-------?
W	EUR	6	152246848	G	A	rs75730028	SYNE1	0.073076	0.849828	0.013952	0.822482	0.878083	-9.75121	1.95e-22	21.7109	12.8269	0.23351	0.22039	11	704060	-----------?
W	EUR	6	152247587	A	G	rs9371246	SYNE1	0.546369	1.0705	0.009171	1.05253	1.08878	7.88545	3.29e-15	14.4833	22.4359	0.021206	0.509714	12	723937	++-++++-++++
W	EUR	6	152248031	T	C	rs35065475	SYNE1	0.585239	1.06702	0.009337	1.04872	1.08564	7.34954	2.07e-13	12.6831	25.27	0.008322	0.5647	12	723937	+--++++++++-
W	EUR	6	152249139	G	A	rs17215781	SYNE1	0.07238	0.850354	0.014003	0.822908	0.878715	-9.68431	3.75e-22	21.4259	12.7818	0.236129	0.217638	11	704060	-----------?
W	EUR	6	152249280	A	G	rs6557210	SYNE1	0.638032	1.06696	0.009527	1.04829	1.08597	7.19544	6.48e-13	12.1882	32.3136	0.000679	0.659586	12	723937	++-+++++-++-
W	EUR	6	152249905	A	G	rs6940851	SYNE1	0.585352	1.06698	0.009337	1.04868	1.0856	7.34538	2.14e-13	12.6696	25.3457	0.008111	0.566002	12	723937	+--++++++++-
W	EUR	6	152250071	T	G	rs4870087	SYNE1	0.638189	1.06696	0.009531	1.04828	1.08597	7.19152	6.67e-13	12.1758	32.1028	0.000734	0.657351	12	723937	++-+++++-++-
W	EUR	6	152250080	A	C	rs4870088	SYNE1	0.638116	1.06685	0.009529	1.04817	1.08586	7.18093	7.21e-13	12.1421	31.8932	0.000793	0.655099	12	723937	++-+++++-++-
W	EUR	6	152251214	T	G	rs9383980	SYNE1	0.585448	1.06723	0.00934	1.04893	1.08586	7.37136	1.76e-13	12.754	25.0183	0.009061	0.560322	12	723937	+--++++++++-
W	EUR	6	152253365	C	T	rs7740449	SYNE1	0.638091	1.06732	0.009534	1.04863	1.08634	7.22974	5.04e-13	12.2975	32.2733	0.000689	0.659161	12	723937	++-+++++-++-
W	EUR	6	152254038	A	G	rs4870089	SYNE1	0.587138	1.07057	0.009539	1.05187	1.0896	7.58588	3.45e-14	13.4619	23.3941	0.009382	0.572541	11	704060	+--++++++++?
W	EUR	6	152254569	T	G	rs7763242	SYNE1	0.585279	1.06743	0.00934	1.04912	1.08606	7.3932	1.5e-13	12.8252	25.4421	0.00785	0.567645	12	723937	+--++++++++-
W	EUR	6	152255456	G	A	rs9397495	SYNE1	0.58556	1.06774	0.009346	1.04943	1.08638	7.42424	1.18e-13	12.9267	24.581	0.010494	0.552501	12	723937	+--++++++++-
W	EUR	6	152257563	C	A	rs9397091	SYNE1	0.586772	1.07075	0.009544	1.05204	1.08979	7.6015	3.06e-14	13.5142	21.6731	0.01686	0.538598	11	704060	+--++++++++?
W	EUR	6	152257960	G	A	rs4869759	SYNE1	0.585419	1.06786	0.009347	1.04954	1.08651	7.43676	1.08e-13	12.9677	24.5582	0.010574	0.552085	12	723937	+--++++++++-
W	EUR	6	152258167	A	C	rs4869761	SYNE1	0.637905	1.06814	0.009545	1.04943	1.08718	7.31171	2.75e-13	12.5607	30.4448	0.001349	0.63869	12	723937	++-+++++-++-
W	EUR	6	152258414	T	C	rs4869762	SYNE1	0.58509	1.06798	0.009349	1.04966	1.08663	7.4486	9.85e-14	13.0066	24.128	0.012204	0.544099	12	723937	+--++++++++-
W	EUR	6	152258680	C	T	rs9383615	SYNE1	0.585185	1.06794	0.00935	1.04962	1.08659	7.44358	1.02e-13	12.9901	23.9596	0.012905	0.540894	12	723937	+--++++++++-
W	EUR	6	152258937	G	A	rs9397092	SYNE1	0.638262	1.06794	0.009543	1.04923	1.08698	7.29131	3.2e-13	12.4949	30.5701	0.001289	0.640171	12	723937	++-+++++-++-
W	EUR	6	152263975	G	A	rs9383982	SYNE1	0.638973	1.06966	0.00956	1.05092	1.08873	7.46858	8.47e-14	13.0724	27.4022	0.003994	0.598572	12	723937	++-+++++-++-
W	EUR	6	152264078	A	G	rs111407432	SYNE1	0.074719	0.856231	0.013706	0.829367	0.883965	-9.54355	1.47e-21	20.8325	13.7339	0.248072	0.19906	12	723937	------------
W	EUR	6	152264319	G	A	rs4870090	SYNE1	0.621195	1.06824	0.009755	1.04913	1.08771	7.16469	8.12e-13	12.0907	27.6039	0.003721	0.601506	12	723937	++-+++++-++-
W	EUR	6	152264364	C	G	rs4870091	SYNE1	0.638812	1.06985	0.00956	1.05111	1.08892	7.48888	7.26e-14	13.1394	27.1165	0.004413	0.594343	12	723937	++-+++++-++-
W	EUR	6	152266617	C	T	rs6921228	SYNE1	0.638962	1.06946	0.00956	1.05072	1.08853	7.4466	1e-13	13.0001	28.6499	0.002572	0.616054	12	723937	++-+++++-++-
W	EUR	6	152266799	A	C	rs6937888	SYNE1	0.638819	1.06921	0.009557	1.05048	1.08828	7.42079	1.22e-13	12.9154	28.5742	0.002642	0.615037	12	723937	++-+++++-++-
W	EUR	6	152269482	G	T	rs6939382	SYNE1	0.645943	1.0692	0.00962	1.05035	1.0884	7.37084	1.77e-13	12.7523	28.6407	0.00258	0.615931	12	723937	++++++++-++-
W	EUR	6	152270980	G	C	rs36069217	SYNE1	0.073252	0.85578	0.013812	0.828709	0.883735	-9.49633	2.32e-21	20.6353	14.0689	0.229205	0.218133	12	723937	------------
W	EUR	6	152271616	T	C	rs633891	SYNE1	0.433349	1.0809	0.009338	1.0626	1.09952	8.92816	4.59e-19	18.3383	26.9174	0.001443	0.665644	10	694973	++?++++++++?
W	EUR	6	152271966	T	C	rs76190980	SYNE1	0.089537	0.897079	0.01328	0.871051	0.923886	-7.22985	5.04e-13	12.2978	14.2694	0.075008	0.43936	9	666543	--??--++---?
W	EUR	6	152271967	G	A	rs6904757	SYNE1	0.354662	0.928567	0.008248	0.912401	0.94502	-8.2709	1.4e-16	15.854	13.5856	0.13785	0.337533	10	694973	--?----+---?
W	EUR	6	152277329	A	G	rs117866066	SYNE1	0.100459	0.884365	0.016156	0.8527	0.917207	-6.6055	4.1e-11	10.3871	13.2394	0.152071	0.320209	10	575889	?-+--------?
W	EUR	6	152281283	T	C	rs78404593	SYNE1	0.110296	0.901741	0.012012	0.878197	0.925916	-7.66241	1.91e-14	13.7192	5.62092	0.777177	0	10	694973	--?--------?
W	EUR	6	152282489	C	G	rs9397093	SYNE1	0.291151	0.944296	0.008549	0.92754	0.961355	-6.27443	3.62e-10	9.44126	16.9232	0.07608	0.409096	11	714850	-+?-------+-
W	EUR	6	152283709	G	A	rs9397500	SYNE1	0.291685	0.94396	0.008546	0.927208	0.961013	-6.31321	2.82e-10	9.54965	16.379	0.089286	0.389461	11	714850	--?-------+-
W	EUR	6	152285439	A	G	rs78971980	SYNE1	0.112794	0.90822	0.011741	0.885208	0.931831	-7.35197	2.04e-13	12.691	10.8062	0.459635	0	12	723937	--++--------
W	EUR	6	152285542	A	G	rs76984077	SYNE1	0.112675	0.907921	0.011745	0.884902	0.93154	-7.37236	1.75e-13	12.7573	10.4592	0.489615	0	12	723937	--++--------
W	EUR	6	152289837	G	A	rs13211170	SYNE1	0.22231	1.12282	0.010923	1.10141	1.14464	11.7936	4.58e-32	31.3395	60.4938	2.92e-09	0.834694	11	714850	++?+++++-+++
W	EUR	6	152291339	C	A	rs73007778	SYNE1	0.199224	0.924495	0.009865	0.90516	0.944244	-7.28016	3.48e-13	12.459	18.3141	0.04989	0.453973	11	714850	-+?---------
W	EUR	6	152293038	T	C	rs10485256	SYNE1	0.17768	0.934653	0.010347	0.914373	0.955383	-6.03801	1.61e-09	8.79431	21.6491	0.016996	0.538086	11	714850	-+?--------+
W	EUR	6	152295038	A	G	rs584336	SYNE1	0.245812	1.11904	0.010531	1.0984	1.14006	11.8407	2.61e-32	31.5827	47.7145	7e-07	0.79042	11	714850	++?+++++-+++
W	EUR	6	152299647	C	T	rs17216894	SYNE1	0.183434	0.938918	0.010278	0.918773	0.959504	-5.69578	1.26e-08	7.89975	22.1926	0.014153	0.549399	11	714850	-+?+-------+
W	EUR	6	152299738	G	A	rs10485257	SYNE1	0.18305	0.937705	0.010275	0.917567	0.958285	-5.80686	6.54e-09	8.18468	22.4419	0.013005	0.554404	11	714850	-+?+-------+
W	EUR	6	152300259	T	C	rs7751093	SYNE1	0.1828	0.93419	0.010419	0.913769	0.955067	-6.03693	1.62e-09	8.79139	19.4429	0.02168	0.537106	10	694973	-+?+-------?
W	EUR	6	152301741	A	T	rs1010714	SYNE1	0.594064	1.06111	0.009176	1.04313	1.07941	6.8015	1.07e-11	10.9691	42.2849	6.67e-06	0.763509	11	714850	+-?+++++-++-
W	EUR	6	152303832	C	A	rs12530184	SYNE1	0.219464	0.940022	0.009543	0.921317	0.959107	-6.0316	1.67e-09	8.7771	14.1136	0.167873	0.291464	11	714850	--?+-------+
W	EUR	6	152304828	A	G	rs11752464	SYNE1	0.193291	0.941224	0.010046	0.921535	0.961335	-5.61581	2.01e-08	7.69785	19.1867	0.037954	0.478807	11	714850	-+?+-------+
W	EUR	6	152305554	G	A	rs9383984	SYNE1	0.457002	0.939442	0.008045	0.923674	0.95548	-7.23334	4.91e-13	12.309	29.6371	0.000506	0.696326	10	698741	--?+--?-+--+
W	EUR	6	152306818	G	A	rs36019875	SYNE1	0.229618	1.10844	0.010778	1.08732	1.12998	10.4866	1.07e-25	24.9706	37.882	1.83e-05	0.76242	10	694973	++?+++-+-++?
W	EUR	6	152307964	T	C	rs9479289	SYNE1	0.228079	1.10652	0.010618	1.08571	1.12773	10.4496	1.58e-25	24.8011	40.1228	1.61e-05	0.750765	11	714850	++?+++-+-+++
W	EUR	6	152309045	A	G	rs7742927	SYNE1	0.228139	1.10653	0.010622	1.08571	1.12775	10.4456	1.65e-25	24.7827	40.8427	1.2e-05	0.755158	11	714850	++?+++-+-+++
W	EUR	6	152310130	G	A	rs34118755	SYNE1	0.229766	1.10865	0.011046	1.087	1.13073	10.2513	1.25e-24	23.9021	37.2071	1.05e-05	0.784987	9	636410	++?+?+-+-?++
W	EUR	6	152311783	T	A	rs1962704	SYNE1	0.478497	1.07006	0.009766	1.05092	1.08955	7.35252	2.03e-13	12.6928	14.9487	0.02066	0.598627	7	600424	++?+?+?++?+?
W	EUR	6	152314488	C	A	rs7757046	SYNE1	0.503743	0.951579	0.007918	0.93606	0.967356	-5.91594	3.39e-09	8.46955	33.1396	0.000258	0.698246	11	714850	--?---++-+--
W	EUR	6	152314875	C	T	rs7761707	SYNE1	0.493288	0.943566	0.008991	0.925944	0.961523	-6.03932	1.59e-09	8.79783	26.5263	0.000178	0.773809	7	476941	--?-?-++-???
W	EUR	6	152317074	G	A	rs1890100	SYNE1	0.679929	0.932601	0.008308	0.916317	0.949174	-7.76419	8.61e-15	14.0652	62.6082	4.2e-10	0.856249	10	694973	--?+---++++?
W	EUR	6	152317104	C	T	rs931423	SYNE1	0.679609	0.932289	0.008303	0.916014	0.948853	-7.80316	6.33e-15	14.1989	61.0474	8.42e-10	0.852574	10	694973	--?+---++-+?
W	EUR	6	152317277	G	A	rs6901934	SYNE1	0.680742	0.933757	0.008198	0.917689	0.950105	-7.73957	1.04e-14	13.9811	63.3571	8.35e-10	0.842164	11	714850	--?+---++++-
W	EUR	6	152319390	C	T	rs9397095	SYNE1	0.535554	0.946735	0.007853	0.931343	0.962381	-6.545	6.15e-11	10.2108	39.5693	2.02e-05	0.747279	11	714850	--?---++-+--
W	EUR	6	152320305	C	G	rs1844356	SYNE1	0.503304	0.952042	0.0079	0.936558	0.967783	-5.87406	4.37e-09	8.35956	32.402	0.000343	0.691377	11	714850	--?---++-+--
W	EUR	6	152320471	T	G	rs4472361	SYNE1	0.680315	0.934575	0.00819	0.918522	0.950908	-7.65448	2.03e-14	13.6924	63.137	9.19e-10	0.841614	11	714850	--?+---++++-
W	EUR	6	152322230	C	T	rs9322367	SYNE1	0.630101	0.938698	0.008205	0.922617	0.955059	-7.1757	7.49e-13	12.1255	47.3265	8.24e-07	0.788702	11	714850	--?+---++-+-
W	EUR	6	152322735	C	T	rs7776230	SYNE1	0.677971	0.934224	0.00816	0.91823	0.950497	-7.72254	1.19e-14	13.9231	62.2871	1.33e-09	0.839453	11	714850	--?+---++++-
W	EUR	6	152322830	C	T	rs7776399	SYNE1	0.616771	0.941321	0.008082	0.925481	0.957432	-6.98396	2.98e-12	11.5255	47.5808	3.06e-07	0.810848	10	694973	--?+---++--?
W	EUR	6	152322976	C	T	rs7738189	SYNE1	0.499576	0.953512	0.008167	0.937505	0.969792	-5.51116	3.65e-08	7.43773	32.5836	0.000158	0.723787	10	694973	-+?---++-+-?
W	EUR	6	152323030	T	C	rs9479291	SYNE1	0.544872	0.949305	0.007865	0.933889	0.964975	-6.22834	4.86e-10	9.31329	37.0918	5.46e-05	0.730399	11	714850	--?---++-+--
W	EUR	6	152325558	C	T	rs9479294	SYNE1	0.449787	0.953241	0.007928	0.937702	0.969038	-5.71056	1.16e-08	7.93738	33.9933	0.000185	0.705825	11	714850	-+?+--+++++-
W	EUR	6	152327010	T	C	rs9371585	SYNE1	0.582442	0.954964	0.007979	0.939326	0.970862	-5.47029	4.6e-08	7.33741	57.8223	9.34e-09	0.827056	11	714850	--?+--+++++-
W	EUR	6	152327792	G	A	rs6557213	SYNE1	0.457005	0.95196	0.008032	0.936217	0.967968	-5.78636	7.38e-09	8.13171	32.5288	0.000161	0.723322	10	686420	-+??--+++++-
W	EUR	6	152328832	C	G	rs13206045	SYNE1	0.177771	1.12351	0.01169	1.1006	1.1469	11.0784	1.72e-28	27.7633	36.2756	7.55e-05	0.724333	11	695507	+++?++++++++
W	EUR	6	152331902	C	T	rs9478314	SYNE1	0.450893	0.954369	0.007933	0.93882	0.970175	-5.57284	2.57e-08	7.59048	34.8641	0.000132	0.713172	11	714850	-+?+--++++--
W	EUR	6	152332002	T	C	rs13218956	SYNE1	0.174683	1.12267	0.011593	1.09995	1.14586	11.0916	1.49e-28	27.8273	36.3033	0.000151	0.696998	12	723937	++++++++++++
W	EUR	6	152337207	A	T	rs35950798	SYNE1	0.156593	1.1352	0.012602	1.1105	1.16045	11.2985	1.44e-29	28.8403	23.5632	0.002712	0.660488	9	636410	++?+?++-+?++
W	EUR	6	152337239	G	A	rs28385620	SYNE1	0.155435	1.13161	0.012103	1.10789	1.15584	11.4391	2.89e-30	29.5395	29.7963	0.001706	0.630827	12	723937	+++++++-++++
W	EUR	6	152338679	C	A	rs11756362	SYNE1	0.15485	1.1314	0.012111	1.10766	1.15564	11.4114	3.97e-30	29.4008	28.3571	0.002853	0.61209	12	723937	+++++++-++++
W	EUR	6	152338947	A	G	rs13196107	SYNE1	0.174861	1.11479	0.011476	1.09229	1.13774	10.4486	1.6e-25	24.7966	25.0674	0.008912	0.561183	12	723937	++-++++-++++
W	EUR	6	152339316	A	G	rs71575926	SYNE1	0.154769	1.1313	0.012108	1.10756	1.15553	11.4054	4.26e-30	29.3708	28.7329	0.002497	0.617163	12	723937	+++++++-++++
W	EUR	6	152339702	T	G	rs9371587	SYNE1	0.227274	1.09167	0.010348	1.07139	1.11234	9.16624	5.2e-20	19.2839	26.5783	0.005319	0.586129	12	723937	++-++++-++++
W	EUR	6	152340037	C	T	rs11755383	SYNE1	0.155899	1.13159	0.012253	1.10757	1.15612	11.2949	1.5e-29	28.8226	28.3594	0.001581	0.647384	11	704060	+++++++-+++?
W	EUR	6	152343404	T	C	rs35569312	SYNE1	0.147892	1.12952	0.012422	1.10518	1.15441	10.955	6.78e-28	27.1686	30.0584	0.000838	0.667315	11	704060	++-++++-+++?
W	EUR	6	152347982	A	G	rs10223515	SYNE1	0.147902	1.12833	0.012411	1.104	1.15319	10.8576	1.98e-27	26.7037	29.2826	0.001121	0.6585	11	704060	++-++++-+++?
W	EUR	6	152349854	A	G	rs4870098	SYNE1	0.236671	1.08694	0.010221	1.0669	1.10735	8.78335	1.68e-18	17.775	19.8057	0.048077	0.444605	12	723937	++-++++-++++
W	EUR	6	152351405	C	T	rs4632900	SYNE1	0.171805	1.10943	0.011466	1.08695	1.13237	9.94575	2.81e-23	22.5505	29.4839	0.001909	0.626915	12	723937	++-++++-++++
W	EUR	6	152355650	T	G	rs9478323	SYNE1	0.172135	1.11018	0.011466	1.08771	1.13312	10.0173	1.37e-23	22.8634	29.3665	0.001991	0.625423	12	723937	++-++++-++++
W	EUR	6	152356975	C	G	rs6906442	SYNE1	0.171928	1.11016	0.011472	1.08768	1.13311	10.011	1.46e-23	22.8359	29.6251	0.001814	0.628694	12	723937	++-++++-+-++
W	EUR	6	152357952	A	G	rs9478325	SYNE1	0.176496	1.10966	0.011532	1.08705	1.13273	9.90996	4.03e-23	22.3948	28.9909	0.00125	0.655065	11	695507	++-?+++-++++
W	EUR	6	152358594	A	G	rs9478326	SYNE1	0.172372	1.10955	0.011453	1.0871	1.13246	9.9686	2.24e-23	22.6503	29.5267	0.001879	0.627455	12	723937	++-++++-++++
W	EUR	6	152359709	C	T	rs34082537	SYNE1	0.160208	1.11475	0.011961	1.09131	1.1387	10.0177	1.36e-23	22.8652	29.3507	0.001093	0.659293	11	704060	++-++++-+-+?
W	EUR	6	152359914	T	A	rs4286796	SYNE1	0.159779	1.11644	0.01182	1.09327	1.1401	10.2952	7.95e-25	24.0997	27.5843	0.003747	0.601222	12	723937	++-++++-+-++
W	EUR	6	152362459	A	G	rs34721749	SYNE1	0.159631	1.11486	0.011818	1.0917	1.13851	10.1503	3.54e-24	23.451	29.6043	0.001828	0.628432	12	723937	++-++++-+-++
W	EUR	6	152363220	T	C	rs62426385	SYNE1	0.629175	0.945761	0.009209	0.927712	0.964161	-5.6724	1.44e-08	7.84046	32.2394	1.47e-05	0.813893	7	476941	--?+?--++???
W	EUR	6	152363227	G	A	rs62426386	SYNE1	0.633116	0.944837	0.009205	0.926796	0.96323	-5.76854	8.21e-09	8.08579	32.7539	1.17e-05	0.816816	7	476941	--?+?--++???
W	EUR	6	152363355	G	A	rs62426387	SYNE1	0.63091	0.937953	0.00988	0.918589	0.957725	-6.01827	1.81e-09	8.74135	30.652	2.95e-05	0.804254	7	274964	--?+??-++??-
W	EUR	6	152363450	C	T	rs144444583	SYNE1	0.146928	1.12721	0.012277	1.10315	1.1518	10.8763	1.61e-27	26.7926	32.6866	0.000591	0.663471	12	723937	++-++++-++++
W	EUR	6	152390610	T	C	rs7766519	SYNE1	0.290215	1.06715	0.009562	1.04841	1.08622	7.18903	6.79e-13	12.1678	41.6097	8.8e-06	0.759671	11	714850	++?++++--+-+
W	EUR	6	152390998	A	C	rs9942536	SYNE1	0.289123	1.06588	0.009559	1.04714	1.08495	7.05128	1.84e-12	11.7344	42.7052	5.61e-06	0.765836	11	714850	++?++++--+-+
W	EUR	6	152391167	T	C	rs9942542	SYNE1	0.285169	1.06463	0.009776	1.04547	1.08414	6.75845	1.45e-11	10.8398	41.5371	3.99e-06	0.783326	10	694973	++?++++--+-?
W	EUR	6	152443555	C	T	rs56263396	SYNE1	0.195654	1.09317	0.010947	1.07171	1.11506	8.80799	1.35e-18	17.8702	51.9436	1.17e-07	0.807484	11	714850	++?++++--+-+
W	EUR	6	152452016	T	A	rs548596170	SYNE1	0.038777	1.31671	0.04172	1.23494	1.4039	8.41099	4.29e-17	16.368	0	1		1	128171	+???????????
W	EUR	6	152465828	T	C	rs13211693	SYNE1	0.236445	1.08187	0.010179	1.06192	1.1022	8.28648	1.23e-16	15.9108	39.7467	3.95e-05	0.723247	12	723937	++-++++--+++
W	EUR	6	152505492	T	C	rs13200897	SYNE1	0.207989	1.09051	0.010661	1.06962	1.11182	8.77825	1.76e-18	17.7554	47.4775	1.77e-06	0.768311	12	723937	+--++++--+++
W	EUR	6	152515525	A	G	rs9371605	SYNE1	0.34601	1.06872	0.009153	1.05078	1.08697	7.69505	1.48e-14	13.8297	42.9691	1.1e-05	0.744002	12	723937	+--++++-++++
W	EUR	6	152515586	T	C	rs9384004	SYNE1	0.349933	1.06807	0.009264	1.04991	1.08654	7.52715	5.42e-14	13.2661	42.565	5.95e-06	0.765065	11	695507	+--?+++-++++
W	EUR	6	152516106	C	T	rs13210676	SYNE1	0.346779	1.06966	0.009158	1.05171	1.08792	7.79945	6.51e-15	14.1861	43.0392	1.07e-05	0.744419	12	723937	+--++++-++++
W	EUR	6	152519442	T	C	rs1609125	SYNE1	0.347497	1.0696	0.009149	1.05167	1.08784	7.79996	6.49e-15	14.1879	41.8216	1.74e-05	0.736978	12	723937	+--++++-++++
W	EUR	6	152526200	A	G	rs2141152	SYNE1	0.346815	1.06966	0.009157	1.05171	1.08791	7.80034	6.47e-15	14.1892	41.9394	1.66e-05	0.737717	12	723937	+--++++-++++
W	EUR	6	152527148	A	G	rs12192594	SYNE1	0.346843	1.06987	0.009159	1.05192	1.08813	7.82278	5.41e-15	14.2664	42.4292	1.36e-05	0.740744	12	723937	+--++++-++++
W	EUR	6	152527579	A	G	rs11155858	SYNE1	0.407556	1.06014	0.008856	1.04279	1.07779	6.93431	4.24e-12	11.3727	41.1177	2.3e-05	0.732475	12	723937	+--++-+-++++
W	EUR	6	152528240	A	C	rs2141151	SYNE1	0.207346	1.09174	0.010996	1.07019	1.11372	8.62835	6.58e-18	17.1821	43.7185	1.59e-06	0.794137	10	675630	+--?+++--++?
W	EUR	6	152528353	A	G	rs2178010	SYNE1	0.346812	1.06985	0.009159	1.0519	1.08811	7.8204	5.52e-15	14.2582	42.4683	1.34e-05	0.740983	12	723937	+--++++-++++
W	EUR	6	152534202	A	G	rs2141147	SYNE1	0.413175	1.05998	0.00923	1.04189	1.07839	6.63235	3.42e-11	10.4659	37.1969	2.43e-05	0.758044	10	645497	+--+?-+-+?++
W	EUR	6	152536715	C	T	rs9384008	SYNE1	0.348755	1.06986	0.009145	1.05193	1.08809	7.83313	4.99e-15	14.3021	43.7079	8.17e-06	0.748329	12	723937	+--++++-++++
W	EUR	6	152536965	G	A	rs12154168	SYNE1	0.34727	1.06939	0.00916	1.05143	1.08765	7.76645	8.45e-15	14.0729	42.9621	1.1e-05	0.743961	12	723937	+--++++-++++
W	EUR	6	152537414	T	G	rs10457879	SYNE1	0.346893	1.06914	0.009163	1.05118	1.08741	7.73466	1.09e-14	13.9643	42.662	1.24e-05	0.742159	12	723937	+--++++-++++
W	EUR	6	152537500	G	A	rs9322377	SYNE1	0.348098	1.0702	0.009155	1.05225	1.08845	7.86433	3.89e-15	14.41	43.563	8.66e-06	0.747492	12	723937	+--++++-++++
W	EUR	6	152538508	T	G	rs1405695	SYNE1	0.347385	1.06992	0.009165	1.05196	1.08819	7.82356	5.38e-15	14.2691	42.8744	1.14e-05	0.743437	12	723937	+--++++-++++
W	EUR	6	152538640	A	C	rs1405696	SYNE1	0.336026	1.0684	0.009872	1.04905	1.08811	7.09513	1.34e-12	11.8715	34.3524	1.48e-05	0.79623	8	616533	+-?+?++-+?+?
W	EUR	6	152539563	C	A	rs9384009	SYNE1	0.348196	1.06983	0.009158	1.05188	1.08809	7.81899	5.58e-15	14.2534	42.7428	1.2e-05	0.742647	12	723937	+--++++-++++
W	EUR	6	152549567	T	C	rs13216059	SYNE1	0.203375	1.09339	0.010784	1.07226	1.11495	8.96465	3.3e-19	18.4817	45.9328	3.32e-06	0.76052	12	723937	+--++++--+++
W	EUR	6	152549848	G	A	rs2141149	SYNE1	0.347928	1.07099	0.00919	1.05297	1.08931	7.9246	2.4e-15	14.6196	43.9788	7.33e-06	0.74988	12	723937	+--++++-++++
W	EUR	6	152549857	A	G	rs2141148	SYNE1	0.34789	1.07088	0.00919	1.05287	1.0892	7.91248	2.65e-15	14.5773	43.9695	7.36e-06	0.749827	12	723937	+--++++-++++
W	EUR	6	152550374	C	A	rs6916221	SYNE1	0.334278	1.07624	0.009335	1.05795	1.09486	8.39888	4.75e-17	16.3232	39.8375	3.81e-05	0.723878	12	723937	+--++++-++++
W	EUR	6	152551137	C	A	rs9397523	SYNE1	0.361133	1.06563	0.009363	1.04728	1.0843	7.17268	7.66e-13	12.116	26.07	0.00199	0.654775	10	698741	+-?+++?--+++
W	EUR	6	152551264	G	C	rs17778357	SYNE1	0.14887	1.1052	0.01254	1.08063	1.13034	8.7181	2.99e-18	17.5242	32.1278	0.000381	0.688744	11	714850	+-?+++++++++
W	EUR	6	152551443	A	G	rs12173486	SYNE1	0.21231	1.07606	0.010971	1.05456	1.098	7.11815	1.14e-12	11.9438	46.0561	5.88e-07	0.804586	10	694973	+-?+++-+-+-?
W	EUR	6	152577842	C	T	rs12190943	SYNE1	0.064075	1.13541	0.017449	1.10121	1.17067	8.13842	4.21e-16	15.3757	11.4535	0.323294	0.126904	11	704060	+--+-++++++?
W	EUR	6	152620342	C	T	rs10457882	SYNE1	0.056449	1.13897	0.018505	1.1027	1.17643	7.88054	3.42e-15	14.4662	16.9912	0.07456	0.411459	11	695507	+--?-+++++++
W	EUR	6	152638656	T	C	rs185818970	SYNE1/LOC105378061	0.038462	1.29963	0.041282	1.21872	1.38592	7.99119	1.4e-15	14.853	0	1		1	128171	+???????????
W	EUR	6	152642110	A	G	rs73005242	SYNE1/LOC105378061	0.053544	1.13973	0.018793	1.1029	1.1778	7.80329	6.32e-15	14.1993	14.7979	0.139607	0.324226	11	704060	+----++++++?
W	EUR	6	152688083	A	C	rs188040060	LOC105378061	0.023731	1.32179	0.055426	1.21315	1.44015	6.37594	1.88e-10	9.72634	0	1		1	128171	+???????????
W	EUR	6	152733172	T	C	rs12202589	MYCT1	0.053656	1.13843	0.018515	1.10214	1.17591	7.84395	4.58e-15	14.3395	17.6682	0.089607	0.377411	12	723937	+----+++++++
W	EUR	6	152748586	G	A	rs3757070	MYCT1/VIP	0.076621	1.10399	0.016311	1.07202	1.13691	6.59866	4.29e-11	10.3671	27.8164	0.001024	0.67645	10	686420	+-??-+++++++
W	EUR	6	152755821	T	A	rs12201140	VIP	0.125628	1.07345	0.013719	1.04656	1.10103	5.47613	4.45e-08	7.3517	32.2543	3.64e-05	0.782975	8	616533	+-?-?+-+-?-?
W	EUR	6	152817878	C	T	rs74582999	LINC02840	0.015578	1.17062	0.032227	1.10746	1.23739	5.5664	2.66e-08	7.57446	29.9957	0.000212	0.733295	9	696348	++?-+-??--+-
W	EUR	6	152861811	A	G	rs117549223	LINC02840	0.016332	1.17597	0.029985	1.1172	1.23784	6.19698	5.93e-10	9.22671	6.3976	0.780826	0	11	707828	++---+?++-++
W	EUR	6	152939985	T	A	rs117851271	TUBB4BP7/C11orf98P2	0.019777	1.14688	0.027679	1.09263	1.20383	5.54327	3.04e-08	7.51706	10.1133	0.430609	0.0112039	11	707828	++-+--?+-+++
W	EUR	6	153356054	G	A	rs139939845	LOC105378066	0.025762	1.25737	0.048779	1.16177	1.36085	5.67619	1.41e-08	7.85005	0	1		1	128171	+???????????
W	EUR	6	153381409	A	C	rs188913933	LOC105378066	0.024425	1.28077	0.050546	1.1817	1.38815	6.02453	1.75e-09	8.75813	0	1		1	128171	+???????????
W	EUR	6	153381410	T	C	rs181572965	LOC105378066	0.024425	1.28077	0.050546	1.18169	1.38814	6.02447	1.75e-09	8.75797	0	1		1	128171	+???????????
W	EUR	7	25816496	C	T	rs286701	LINC03007/LOC100506236	0.507553	1.04655	0.008654	1.02959	1.06379	5.4578	4.93e-08	7.30688	12.6804	0.242093	0.211383	11	714850	+-?++++-++++
W	EUR	7	25849533	A	G	rs12700666	LOC100506236/LOC110121115	0.48516	1.04648	0.008582	1.02965	1.06357	5.49453	4.01e-08	7.39682	12.1777	0.350438	0.096707	12	723937	+-+++++-++++
W	EUR	7	25859103	A	T	rs6961848	LOC100506236/LOC110121115	0.495022	1.04733	0.008666	1.03035	1.0646	5.54358	3.04e-08	7.51783	14.2906	0.160146	0.300237	11	714850	++?++++--+++
W	EUR	7	25862418	A	T	rs12700668	LOC100506236/LOC110121115	0.4945	1.04782	0.008673	1.03082	1.0651	5.59791	2.22e-08	7.65304	13.5217	0.195946	0.260449	11	714850	++?++++--+++
W	EUR	7	46631145	G	A	rs993183	HMGN1P19	0.467673	0.952867	0.008215	0.936766	0.969245	-5.55274	2.88e-08	7.54053	6.68663	0.669708	0	10	694973	--?+-------?
W	EUR	8	25385697	G	A	rs34068702	DOCK5	0.299238	0.948546	0.008671	0.931551	0.965852	-5.72665	1.05e-08	7.97841	22.5918	0.012358	0.557362	11	714850	--?++--+++--
W	EUR	8	25389665	A	G	rs4872310	DOCK5	0.248778	0.948776	0.009011	0.931114	0.966773	-5.48463	4.24e-08	7.37254	16.8198	0.113319	0.34601	12	723937	--+-+--+-+--
W	EUR	8	25391099	A	G	rs13261573	DOCK5	0.250798	0.947588	0.009124	0.929705	0.965815	-5.53826	3.13e-08	7.50465	16.3469	0.090123	0.388264	11	704060	--+++--+-+-?
W	EUR	8	25409587	A	G	rs4871939	DOCK5	0.247835	0.947059	0.009003	0.929413	0.96504	-5.66841	1.48e-08	7.83035	15.5279	0.159582	0.291598	12	723937	--+-+--+-+--
W	EUR	8	25423284	G	C	rs6185	GNRH1	0.25582	0.945083	0.009041	0.927363	0.963142	-5.84877	5.09e-09	8.29352	14.9844	0.132631	0.33264	11	695507	--+?+--+-+--
W	EUR	8	74340773	A	T	rs10098229	JPH1/GDAP1	0.591899	0.94676	0.008012	0.931056	0.962728	-6.41115	1.49e-10	9.82621	14.0442	0.170985	0.287963	11	714850	--?+---+----
W	EUR	8	74342225	T	C	rs57669008	JPH1/GDAP1	0.336196	1.05507	0.009491	1.03647	1.07401	5.9067	3.59e-09	8.4452	9.84269	0.36337	0.085616	10	675630	++-?+++-+++?
W	EUR	8	74345373	G	A	rs10090060	JPH1/GDAP1	0.417892	0.943689	0.00804	0.92793	0.959716	-6.74551	1.58e-11	10.8012	10.1066	0.431188	0.0105514	11	704060	--++---+---?
W	EUR	8	74346788	A	G	rs7843391	JPH1/GDAP1	0.470341	0.952734	0.007877	0.937295	0.968427	-5.80896	6.45e-09	8.19012	12.8343	0.304296	0.142919	12	723937	--++---++---
W	EUR	8	74347901	A	G	rs57339169	JPH1/GDAP1	0.326237	1.05157	0.009205	1.03353	1.06993	5.69501	1.27e-08	7.8978	11.7228	0.384836	0.0616576	12	723937	++--+++-++++
W	EUR	8	74348232	T	A	rs62524065	JPH1/GDAP1	0.480624	0.947653	0.008498	0.930996	0.964608	-5.9427	2.88e-09	8.54019	8.26764	0.219144	0.274279	7	588103	--???--+-?-?
W	EUR	8	74349113	C	T	rs10089711	JPH1/GDAP1	0.652753	0.952423	0.008233	0.936286	0.968837	-5.59138	2.31e-08	7.63672	13.2197	0.279211	0.167906	12	723937	--++---+----
W	EUR	8	74349626	G	A	rs6992221	JPH1/GDAP1	0.413918	0.943923	0.00792	0.9284	0.959705	-6.82168	9.33e-12	11.0299	11.3343	0.415694	0.0294975	12	723937	--++---+----
W	EUR	8	74350822	T	C	rs4415302	GDAP1	0.326306	1.05158	0.0092	1.03355	1.06993	5.69947	1.23e-08	7.90913	11.4182	0.40892	0.0366273	12	723937	++--+++-++++
W	EUR	8	74350917	A	C	rs12545409	GDAP1	0.413048	0.944488	0.007923	0.928958	0.960277	-6.75199	1.51e-11	10.8205	10.7861	0.461352	0	12	723937	--+----+----
W	EUR	8	74351041	T	A	rs3739345	GDAP1	0.326277	1.05148	0.009199	1.03345	1.06982	5.68815	1.32e-08	7.88036	11.5488	0.398493	0.0475217	12	723937	++--+++-++++
W	EUR	8	74353365	T	C	rs16938888	GDAP1	0.334115	1.05333	0.009459	1.03479	1.0722	5.73476	1e-08	7.99913	9.22484	0.416784	0.0243736	10	675630	++-?+++-+++?
W	EUR	8	74353687	C	T	rs3780013	GDAP1	0.326309	1.05152	0.009195	1.0335	1.06986	5.69516	1.26e-08	7.89817	11.4572	0.405795	0.0399027	12	723937	++--+++-++++
W	EUR	8	74353954	G	A	rs13269312	GDAP1	0.479909	0.950958	0.007973	0.935332	0.966845	-5.94851	2.78e-09	8.55556	10.6205	0.387839	0.0584237	11	695507	--+?---+----
W	EUR	8	74354444	G	A	rs10504576	GDAP1	0.477597	0.952268	0.007842	0.936898	0.967891	-5.89095	3.95e-09	8.40383	12.1745	0.350673	0.09647	12	723937	--++---+----
W	EUR	8	74354477	G	A	rs13277749	GDAP1	0.41403	0.943951	0.007913	0.928442	0.95972	-6.82405	9.18e-12	11.0371	11.2203	0.424997	0.0196336	12	723937	--++---+----
W	EUR	8	74354679	T	C	rs13278617	GDAP1	0.652938	0.952526	0.008226	0.936402	0.968928	-5.58384	2.41e-08	7.61791	12.8971	0.300102	0.147097	12	723937	--++---+----
W	EUR	8	74355383	G	A	rs9298238	GDAP1	0.471032	0.952656	0.007866	0.937238	0.968328	-5.82598	5.83e-09	8.23424	12.6456	0.31712	0.13013	12	723937	--++---+----
W	EUR	8	74355481	A	C	rs10504579	GDAP1	0.326104	1.05183	0.009199	1.0338	1.07017	5.72773	1.04e-08	7.98117	11.4519	0.406221	0.0394566	12	723937	++--+++-++++
W	EUR	8	74356000	T	C	rs62524066	GDAP1	0.326361	1.05168	0.009197	1.03366	1.07003	5.71319	1.14e-08	7.94406	11.3168	0.417116	0.027995	12	723937	++--+++-++++
W	EUR	8	74357133	C	A	rs16938889	GDAP1	0.326125	1.05168	0.009195	1.03365	1.07001	5.71337	1.14e-08	7.94452	11.2751	0.420516	0.0243949	12	723937	++--+++-++++
W	EUR	8	74357313	G	A	rs13254381	GDAP1	0.47774	0.952547	0.007968	0.93693	0.968424	-5.76441	8.41e-09	8.07517	11.7742	0.30045	0.150688	11	704060	--++---+---?
W	EUR	8	74357329	C	T	rs13256983	GDAP1	0.477715	0.952514	0.007967	0.936899	0.96839	-5.76877	8.2e-09	8.08638	11.8723	0.293696	0.157701	11	704060	--++---+---?
W	EUR	8	74358259	G	A	rs4410896	GDAP1	0.478054	0.952085	0.007835	0.936729	0.967693	-5.91854	3.34e-09	8.47639	11.8519	0.374876	0.0718806	12	723937	--++---+----
W	EUR	8	74358666	T	C	rs10093042	GDAP1	0.394843	0.948857	0.008059	0.93306	0.96492	-6.12913	9.1e-10	9.04083	10.5427	0.394237	0.0514758	11	714850	--?+---+----
W	EUR	8	74359199	A	G	rs10093891	GDAP1	0.477319	0.952471	0.007841	0.937103	0.96809	-5.86767	4.54e-09	8.34285	11.9651	0.366274	0.0806584	12	723937	--++---+----
W	EUR	8	74359392	T	C	rs10096726	GDAP1	0.477373	0.952666	0.007841	0.937297	0.968287	-5.84366	5.25e-09	8.2802	12.2707	0.343647	0.103552	12	723937	--++---+----
W	EUR	8	74359739	G	A	rs7846006	GDAP1	0.47663	0.952973	0.007845	0.937596	0.968601	-5.80396	6.65e-09	8.17715	12.3186	0.340175	0.107044	12	723937	--++---+----
W	EUR	8	74359784	A	G	rs4492365	GDAP1	0.501799	1.04963	0.008642	1.03269	1.06685	5.83596	5.49e-09	8.26019	11.7284	0.384401	0.0621057	12	723937	++-++++-++++
W	EUR	8	74360492	A	C	rs4310196	GDAP1	0.501377	1.05024	0.008644	1.0333	1.06747	5.90778	3.56e-09	8.44805	11.0705	0.437373	0.00637124	12	723937	++-++++-++++
W	EUR	8	74361906	G	T	rs11554166	GDAP1	0.326124	1.05163	0.009191	1.03361	1.06996	5.71023	1.16e-08	7.93654	11.6448	0.390923	0.055375	12	723937	++--+++-++++
W	EUR	8	74362492	A	G	rs6995700	GDAP1	0.326118	1.05147	0.009192	1.03345	1.0698	5.69153	1.29e-08	7.88896	11.4655	0.40513	0.0405982	12	723937	++--+++-++++
W	EUR	8	74362522	G	A	rs6995431	GDAP1	0.326363	1.05128	0.009188	1.03327	1.0696	5.67303	1.44e-08	7.84205	11.5524	0.398207	0.0478197	12	723937	++--+++-++++
W	EUR	8	74363586	G	A	rs7000984	GDAP1	0.326482	1.05159	0.009189	1.03358	1.06992	5.7074	1.18e-08	7.92931	11.3606	0.41357	0.0317375	12	723937	++--+++-++++
W	EUR	8	74366222	G	A	rs6472842	GDAP1	0.326542	1.05122	0.009185	1.03322	1.06953	5.66758	1.49e-08	7.82825	11.4203	0.408755	0.0368006	12	723937	++--+++-++++
W	EUR	8	74366581	G	A	rs10504580	GDAP1	0.326268	1.05185	0.009193	1.03383	1.07018	5.73428	1e-08	7.99792	11.1922	0.427305	0.0171725	12	723937	++--+++-++++
W	EUR	8	74367412	C	T	rs7842662	GDAP1	0.414264	0.944182	0.007906	0.928686	0.959936	-6.80296	1.06e-11	10.9735	11.2722	0.420753	0.0241441	12	723937	--++---+----
W	EUR	8	74371461	G	C	rs56089345	GDAP1	0.324794	1.05442	0.009591	1.03562	1.07355	5.77326	7.98e-09	8.09794	9.56891	0.386497	0.0594539	10	645497	++--?++-+?++
W	EUR	8	74372844	C	G	rs62524068	GDAP1	0.325048	1.05358	0.009582	1.0348	1.0727	5.68759	1.32e-08	7.87895	10.6011	0.304046	0.15103	10	645497	++--?++-+?++
W	EUR	8	74373796	A	G	rs10103846	GDAP1	0.41972	0.941802	0.008175	0.925779	0.958102	-6.84884	7.73e-12	11.1121	9.44978	0.396832	0.0475973	10	645497	----?--+-?--
W	EUR	8	74376415	T	C	rs10094204	GDAP1	0.653526	0.953405	0.008238	0.937258	0.969831	-5.47504	4.48e-08	7.34904	13.2554	0.276962	0.170148	12	723937	--++---+----
W	EUR	8	74376559	C	T	rs12545112	GDAP1	0.430673	0.942129	0.008164	0.926127	0.958407	-6.82056	9.41e-12	11.0265	9.33087	0.40731	0.0354593	10	645497	--+-?--+-?--
W	EUR	8	74376563	A	G	rs12542469	GDAP1	0.450521	0.94476	0.00816	0.928767	0.961029	-6.52336	7.11e-11	10.1481	10.5876	0.30504	0.149948	10	645497	--+-?--+-?--
W	EUR	8	74376852	C	T	rs6996555	GDAP1	0.32645	1.05068	0.009322	1.0324	1.06927	5.52279	3.42e-08	7.46643	11.7025	0.305463	0.145479	11	704060	++--+++-+++?
W	EUR	8	74376856	T	C	rs7014464	GDAP1	0.326234	1.05102	0.009327	1.03274	1.06962	5.55796	2.8e-08	7.5535	11.601	0.312646	0.138006	11	704060	++--+++-+++?
W	EUR	8	74377934	T	C	rs7813701	GDAP1	0.334109	1.05286	0.009443	1.03435	1.0717	5.69296	1.28e-08	7.89258	10.0649	0.345258	0.105802	10	675630	++-?+++-+++?
W	EUR	8	74377935	G	A	rs7813560	GDAP1	0.326591	1.05075	0.009178	1.03276	1.06905	5.61845	1.97e-08	7.70449	12.4827	0.328472	0.118783	12	723937	++--+++-++++
W	EUR	8	74378679	T	G	rs6987150	GDAP1	0.326523	1.0514	0.009176	1.03341	1.0697	5.69385	1.27e-08	7.89485	11.691	0.387311	0.0591061	12	723937	++--+++-++++
W	EUR	8	74378880	A	G	rs12544032	GDAP1	0.418868	0.94429	0.007867	0.92887	0.959965	-6.82397	9.19e-12	11.0368	11.0765	0.436877	0.0069058	12	723937	--+----+----
W	EUR	8	74378933	A	G	rs62524069	GDAP1	0.326119	1.05163	0.009181	1.03363	1.06993	5.71607	1.12e-08	7.9514	11.5109	0.401509	0.0443809	12	723937	++--+++-++++
W	EUR	8	74379218	C	T	rs10092584	GDAP1	0.395199	0.950075	0.008147	0.934107	0.966316	-5.92229	3.26e-09	8.48627	11.9988	0.285139	0.166582	11	704060	--++---+---?
W	EUR	8	74379658	G	A	rs10957708	GDAP1	0.326617	1.05199	0.009183	1.03399	1.07031	5.75696	8.79e-09	8.05603	11.3031	0.418228	0.0268185	12	723937	++--+++-++++
W	EUR	8	74380257	T	C	rs6996971	GDAP1	0.48606	0.95048	0.007933	0.934931	0.966288	-6.03492	1.64e-09	8.78602	10.0773	0.433738	0.00767031	11	695507	--+?---+----
W	EUR	8	74380365	A	C	rs4313147	GDAP1	0.652256	0.950823	0.008233	0.934686	0.967238	-5.77428	7.93e-09	8.10058	11.3382	0.331787	0.118022	11	714850	--?+---+----
W	EUR	8	74380493	T	C	rs4551345	GDAP1	0.651926	0.949657	0.008515	0.932967	0.966646	-5.70985	1.16e-08	7.93556	11.7591	0.227231	0.234638	10	645497	--++?--+-?--
W	EUR	8	74380529	C	G	rs6997725	GDAP1	0.421133	0.943983	0.007856	0.928585	0.959636	-6.87017	6.66e-12	11.1768	10.2201	0.510707	0	12	723937	-------+----
W	EUR	8	74380915	C	T	rs7018207	GDAP1	0.326618	1.05222	0.009185	1.03422	1.07054	5.78163	7.59e-09	8.11949	10.9981	0.443426	0	12	723937	++--+++-++++
W	EUR	8	74381477	C	T	rs4567029	GDAP1	0.476381	0.950805	0.007819	0.935479	0.966382	-6.08452	1.2e-09	8.91972	10.926	0.449485	0	12	723937	--++---+----
W	EUR	8	74381873	T	G	rs4339639	GDAP1	0.413096	0.942629	0.007889	0.927166	0.958349	-7.00144	2.63e-12	11.5795	10.8718	0.454065	0	12	723937	--++---+----
W	EUR	8	74382060	C	T	rs12548680	GDAP1	0.413194	0.942905	0.007891	0.927439	0.958629	-6.96715	3.36e-12	11.4737	11.0867	0.436025	0.00782403	12	723937	--++---+----
W	EUR	8	74382740	G	T	rs4471028	GDAP1	0.42109	0.941866	0.008124	0.925942	0.958064	-6.88439	6.02e-12	11.2201	9.41434	0.399939	0.0440115	10	675630	--+?---+---?
W	EUR	8	74382875	C	G	rs4469448	GDAP1	0.470556	0.951881	0.007847	0.936501	0.967513	-5.93389	3.04e-09	8.51691	12.8293	0.304626	0.14259	12	723937	--++---+----
W	EUR	8	74383098	G	C	rs12546775	GDAP1	0.471383	0.951833	0.007842	0.936462	0.967456	-5.94306	2.88e-09	8.54115	12.5423	0.32429	0.122967	12	723937	--++---+----
W	EUR	8	74383099	A	T	rs67169113	GDAP1	0.501397	1.05209	0.008651	1.03514	1.06933	6.12587	9.29e-10	9.03198	10.6529	0.472779	0	12	723937	++-++++-++++
W	EUR	8	74384827	G	C	rs10098296	GDAP1	0.471015	0.950845	0.007837	0.935485	0.966457	-6.06616	1.35e-09	8.87011	12.3789	0.335847	0.111391	12	723937	--++---+----
W	EUR	8	74385107	A	G	rs7813767	GDAP1	0.471467	0.951271	0.007836	0.935913	0.966881	-6.0156	1.84e-09	8.73422	12.1201	0.354686	0.0924142	12	723937	--++---+----
W	EUR	8	74385353	A	G	rs62524086	GDAP1	0.31174	1.0524	0.009304	1.03416	1.07096	5.7264	1.05e-08	7.97776	12.2965	0.341777	0.105434	12	723937	++--+++-++++
W	EUR	8	74385966	G	A	rs4305896	GDAP1	0.471297	0.951382	0.007841	0.936014	0.967002	-5.99847	2.05e-09	8.68842	12.2722	0.343536	0.103664	12	723937	--++---+----
W	EUR	8	74387035	G	C	rs10113382	GDAP1	0.4713	0.951523	0.007842	0.936153	0.967145	-5.98077	2.28e-09	8.64124	12.4296	0.332234	0.115014	12	723937	--++---+----
W	EUR	8	74387552	C	G	rs13255678	GDAP1	0.412327	0.943226	0.007896	0.92775	0.958961	-6.92462	4.54e-12	11.343	10.5677	0.480154	0	12	723937	--+----+----
W	EUR	8	74388363	C	A	rs13264285	GDAP1	0.413251	0.942451	0.007888	0.92699	0.958169	-7.02334	2.25e-12	11.6474	11.2557	0.422099	0.0227155	12	723937	--++---+----
W	EUR	8	74388914	G	A	rs10093087	GDAP1	0.412573	0.943187	0.007895	0.927714	0.958919	-6.93041	4.36e-12	11.3607	11.1635	0.429665	0.0146501	12	723937	--++---+----
W	EUR	8	74389018	G	T	rs10108295	GDAP1	0.47052	0.951857	0.007846	0.936479	0.967488	-5.93737	2.98e-09	8.52611	12.184	0.349976	0.0971732	12	723937	--++---++---
W	EUR	8	74391917	T	C	rs10957712	GDAP1	0.414427	0.943043	0.007891	0.927576	0.958768	-6.95052	3.78e-12	11.4225	10.7464	0.464744	0	12	723937	-------+----
W	EUR	8	74391983	C	A	rs10957713	GDAP1	0.415296	0.942968	0.007889	0.927505	0.958688	-6.96138	3.5e-12	11.4559	11.2858	0.419636	0.0253275	12	723937	--++---+----
W	EUR	8	74392718	G	A	rs61081722	GDAP1	0.326668	1.05234	0.009189	1.03433	1.07066	5.79233	7.13e-09	8.14711	10.5548	0.48128	0	12	723937	++--+++-++++
W	EUR	8	74393079	T	G	rs10109451	GDAP1	0.412405	0.943079	0.007895	0.927605	0.958812	-6.94292	3.99e-12	11.3991	10.7277	0.46635	0	12	723937	--+----+----
W	EUR	8	74393727	G	A	rs10957714	GDAP1	0.39426	0.948356	0.008011	0.932654	0.964322	-6.22497	4.97e-10	9.30396	12.1763	0.350538	0.0966062	12	723937	--++---+----
W	EUR	8	74395596	A	G	rs10283076	GDAP1	0.485602	0.949525	0.007931	0.933981	0.965328	-6.15019	7.97e-10	9.09832	9.57904	0.478168	0	11	695507	---?---+----
W	EUR	8	74396247	T	C	rs16938900	GDAP1	0.326728	1.05183	0.009184	1.03383	1.07014	5.7374	9.87e-09	8.0059	11.4638	0.405264	0.0404576	12	723937	++--+++-++++
W	EUR	8	74397396	A	G	rs28888760	GDAP1	0.470219	0.949773	0.008151	0.933797	0.966022	-5.95403	2.69e-09	8.5702	11.2229	0.260741	0.198067	10	645497	--++?--++?--
W	EUR	8	74398072	A	G	rs7350096	GDAP1	0.309979	1.05464	0.009869	1.0353	1.07435	5.63311	1.81e-08	7.74131	9.59962	0.294258	0.166634	9	625620	++--?++-+?+?
W	EUR	8	74398176	G	A	rs7825334	GDAP1	0.47012	0.949108	0.008193	0.93305	0.965442	-5.99971	2.03e-09	8.69173	10.5523	0.228377	0.241873	9	636410	--?+?--++?--
W	EUR	8	74399042	A	G	rs13278728	GDAP1	0.470143	0.949806	0.008151	0.93383	0.966056	-5.94989	2.76e-09	8.55922	11.309	0.255124	0.204171	10	645497	--++?--++?--
W	EUR	8	74399096	G	A	rs13278048	GDAP1	0.412134	0.940836	0.008203	0.924758	0.957193	-6.93507	4.22e-12	11.375	10.023	0.348628	0.102064	10	645497	--+-?--+-?--
W	EUR	8	74399460	C	T	rs200066597	GDAP1	0.469715	0.950592	0.008302	0.934321	0.967147	-5.75228	9.04e-09	8.04403	11.1926	0.191026	0.285239	9	625620	--++?--++?-?
W	EUR	8	74400437	G	T	rs56222119	GDAP1	0.4997	1.05524	0.009193	1.03723	1.07358	6.11942	9.67e-10	9.01441	9.88981	0.272845	0.191087	9	625620	++-+?++-+?+?
W	EUR	8	74400914	C	A	rs10091634	GDAP1	0.469579	0.950421	0.0083	0.934152	0.966972	-5.77283	8e-09	8.09682	11.4776	0.176079	0.302989	9	625620	--++?--++?-?
W	EUR	8	74401583	G	C	rs13271475	GDAP1	0.411977	0.941539	0.008353	0.925168	0.9582	-6.73126	1.74e-11	10.7586	10.1441	0.255058	0.211364	9	625620	--+-?--+-?-?
W	EUR	8	74402015	C	T	rs10110715	GDAP1	0.412001	0.941529	0.008353	0.925158	0.95819	-6.73238	1.73e-11	10.762	10.1474	0.254831	0.211622	9	625620	----?--+-?-?
W	EUR	8	74402312	T	A	rs7813869	GDAP1	0.469661	0.950294	0.008298	0.934029	0.966842	-5.78838	7.3e-09	8.1369	11.5063	0.174628	0.304729	9	625620	--++?--++?-?
W	EUR	8	74402336	T	G	rs7814378	GDAP1	0.411183	0.941501	0.008357	0.925121	0.958171	-6.73173	1.74e-11	10.76	9.9474	0.268737	0.19577	9	625620	----?--+-?-?
W	EUR	8	74402541	T	C	rs7814432	GDAP1	0.469638	0.950362	0.008301	0.934091	0.966916	-5.77848	7.74e-09	8.11138	11.438	0.178096	0.300576	9	625620	--++?--++?-?
W	EUR	8	74402676	G	A	rs6472845	GDAP1	0.469927	0.952206	0.007979	0.936566	0.968107	-5.79605	6.97e-09	8.15671	12.117	0.277305	0.174711	11	704060	--++---++--?
W	EUR	8	74402784	C	A	rs58094920	GDAP1	0.326685	1.05175	0.009334	1.03345	1.07037	5.63507	1.79e-08	7.74624	10.8938	0.36585	0.0820483	11	704060	++--+++-+++?
W	EUR	8	74402911	C	G	rs6472846	GDAP1	0.412066	0.943732	0.008033	0.927987	0.959744	-6.74677	1.57e-11	10.8049	10.7733	0.375448	0.0717827	11	704060	--++---+---?
W	EUR	8	74403622	G	A	rs7819394	GDAP1	0.502238	1.05142	0.008792	1.03419	1.06894	5.94763	2.8e-09	8.55324	10.7688	0.375809	0.0713943	11	704060	++-++++-+++?
W	EUR	8	74404008	A	C	rs7819969	GDAP1	0.502483	1.05165	0.008794	1.03442	1.06918	5.97337	2.39e-09	8.62155	10.9042	0.365029	0.0829238	11	704060	++-++++-+++?
W	EUR	8	74404295	A	G	rs13265662	GDAP1	0.46991	0.952092	0.007979	0.936453	0.967992	-5.80979	6.42e-09	8.19225	11.9228	0.290258	0.161269	11	704060	--++---++--?
W	EUR	8	74404328	G	A	rs13265191	GDAP1	0.469979	0.951984	0.00798	0.936343	0.967886	-5.82195	5.97e-09	8.22378	11.8471	0.29542	0.155911	11	704060	--++---++--?
W	EUR	8	74404758	C	T	rs4367527	GDAP1	0.469493	0.951637	0.007977	0.936003	0.967532	-5.86533	4.61e-09	8.33674	12.0615	0.280959	0.170918	11	704060	--++---++--?
W	EUR	8	74404988	C	A	rs11997090	GDAP1	0.469825	0.952275	0.007981	0.936633	0.968179	-5.78685	7.36e-09	8.13296	12.3528	0.262139	0.190467	11	704060	--++---++--?
W	EUR	8	74406024	A	G	rs10957715	GDAP1	0.41216	0.943802	0.008033	0.928057	0.959814	-6.73859	1.66e-11	10.7805	10.7832	0.37466	0.0726276	11	704060	--+----+---?
W	EUR	8	74407284	A	G	rs10957716	GDAP1	0.41208	0.943962	0.008035	0.928213	0.959978	-6.71829	1.91e-11	10.72	10.7624	0.376327	0.0708388	11	704060	--+----+---?
W	EUR	8	74407768	G	A	rs10957717	GDAP1	0.412124	0.943583	0.008033	0.927838	0.959594	-6.7643	1.39e-11	10.8574	10.2854	0.415818	0.0277515	11	704060	--+----+---?
W	EUR	8	74410250	T	C	rs6996800	GDAP1	0.455881	0.952823	0.008	0.937143	0.968765	-5.70839	1.17e-08	7.93183	12.0961	0.278675	0.173289	11	704060	--+----++--?
W	EUR	8	74410879	A	G	rs9774363	GDAP1	0.522232	1.05	0.008808	1.03273	1.06755	5.76812	8.23e-09	8.08472	11.5154	0.318795	0.131599	11	704060	++-++++--++?
W	EUR	8	74411321	C	T	rs62524089	GDAP1	0.522352	1.04989	0.008806	1.03263	1.06744	5.75666	8.8e-09	8.05528	11.6643	0.308153	0.142682	11	704060	++-++++--++?
W	EUR	8	74414384	A	G	rs12548001	GDAP1	0.392069	0.943737	0.008124	0.927814	0.959934	-6.67002	2.65e-11	10.5769	11.0421	0.354245	0.0943777	11	704060	-------+---?
W	EUR	8	74415662	A	G	rs6472847	GDAP1	0.349821	0.942177	0.008448	0.925619	0.95903	-6.58451	4.72e-11	10.3258	10.4769	0.399692	0.0455226	11	704060	-------+---?
W	EUR	9	22141035	A	G	rs7854629	CDKN2B-AS1	0.566762	1.05866	0.009689	1.03967	1.078	6.17271	6.92e-10	9.16001	11.1856	0.130724	0.374198	8	632473	+??-++?++++?
W	EUR	9	22141270	T	C	rs7026735	CDKN2B-AS1	0.31745	1.07292	0.009841	1.05364	1.09257	7.60463	2.99e-14	13.5247	24.9047	0.001613	0.678776	9	666543	+-??+++-+++?
W	EUR	9	22141553	T	G	rs2065504	CDKN2B-AS1	0.499209	1.06568	0.009115	1.04782	1.08385	7.37521	1.71e-13	12.7666	18.5017	0.017764	0.567607	9	666543	+-??+++++++?
W	EUR	9	22141791	A	G	rs2065505	CDKN2B-AS1	0.638077	1.06571	0.009186	1.04771	1.08403	7.32114	2.56e-13	12.5911	15.4048	0.117985	0.350853	11	714850	++?-++++++++
W	EUR	9	22141876	T	C	rs4977577	CDKN2B-AS1	0.648356	1.06904	0.00943	1.05056	1.08785	7.50279	6.53e-14	13.1854	12.88	0.168113	0.30124	10	686420	++??++++++++
W	EUR	9	22141895	T	C	rs6475610	CDKN2B-AS1	0.499551	1.06651	0.008989	1.04889	1.08442	7.57587	3.73e-14	13.4284	17.8296	0.037202	0.495222	10	686420	+-??++++++++
W	EUR	9	22142957	C	A	rs7859532	CDKN2B-AS1	0.667561	1.06677	0.009484	1.04818	1.08569	7.20698	5.96e-13	12.2249	15.992	0.067048	0.43722	10	694973	++?-+++++++?
W	EUR	9	22143134	A	G	rs7862936	CDKN2B-AS1	0.638757	1.05683	0.009119	1.03896	1.07501	6.35125	2.2e-10	9.65659	20.4465	0.025302	0.510918	11	714850	++?-+++++++-
W	EUR	9	22143294	A	T	rs7849199	CDKN2B-AS1	0.328077	1.07635	0.00963	1.05747	1.09556	8.1511	3.79e-16	15.4212	21.3557	0.011162	0.578566	10	686420	+-??+++-++++
W	EUR	9	22143378	C	T	rs7849302	CDKN2B-AS1	0.331014	1.07542	0.009615	1.05658	1.0946	8.06164	7.91e-16	15.1019	21.1507	0.011998	0.574482	10	686420	+-??+++-++++
W	EUR	9	22144256	A	T	rs2151285	CDKN2B-AS1	0.326076	1.07483	0.009623	1.05597	1.09403	7.98868	1.43e-15	14.8442	22.4914	0.007445	0.599847	10	686420	+-??+++-++++
W	EUR	9	22144277	G	C	rs2151284	CDKN2B-AS1	0.638311	1.05758	0.00912	1.0397	1.07576	6.43687	1.26e-10	9.89955	19.6051	0.033217	0.489929	11	714850	++?++++++++-
W	EUR	9	22144306	A	C	rs2151283	CDKN2B-AS1	0.294594	1.06857	0.009792	1.04938	1.08812	7.17245	7.67e-13	12.1152	29.0629	0.000632	0.690327	10	694973	+-?-+++-+++?
W	EUR	9	22144317	T	C	rs2151282	CDKN2B-AS1	0.485917	1.06109	0.008937	1.04357	1.0789	6.98231	3.02e-12	11.5204	21.4661	0.010734	0.580734	10	694973	+-?-+++++++?
W	EUR	9	22145740	A	T	rs7030345	CDKN2B-AS1	0.669608	1.06312	0.009319	1.04485	1.0817	6.92262	4.6e-12	11.3368	18.7495	0.043562	0.466652	11	714850	++?-+++++++-
W	EUR	9	22148056	T	C	rs12341394	CDKN2B-AS1	0.337531	1.07576	0.009476	1.05718	1.09465	8.21848	2.17e-16	15.6639	24.4742	0.006436	0.591406	11	695507	+-+?+++-++++
W	EUR	9	22150262	C	T	rs7856219	CDKN2B-AS1	0.337908	1.07303	0.009298	1.05481	1.09157	8.06514	7.68e-16	15.1144	28.9999	0.00227	0.620689	12	723937	+-+-+++-++++
W	EUR	9	22150793	T	C	rs12337417	CDKN2B-AS1	0.330254	1.06998	0.009681	1.051	1.0893	7.40937	1.32e-13	12.878	28.8866	0.000677	0.688437	10	645497	+-+-?++-+?++
W	EUR	9	22152402	T	C	rs7849231	CDKN2B-AS1	0.309193	1.06754	0.009444	1.04903	1.08638	7.324	2.51e-13	12.6004	31.1088	0.001059	0.646402	12	723937	+-+-+++-++++
W	EUR	9	22152581	A	G	rs6475612	CDKN2B-AS1	0.370923	1.07235	0.009085	1.05455	1.09046	8.17665	3.07e-16	15.513	28.6071	0.002611	0.615481	12	723937	+---++++++++
W	EUR	9	22152644	G	T	rs6475613	CDKN2B-AS1	0.531922	1.06063	0.008848	1.04329	1.07826	6.99856	2.69e-12	11.5706	11.1905	0.342873	0.106382	11	714850	++?-++++++++
W	EUR	9	22153266	C	T	rs6475614	CDKN2B-AS1	0.310435	1.06638	0.009413	1.04793	1.08515	7.21777	5.5e-13	12.2593	32.0345	0.000753	0.65662	12	723937	+-+-+++-++++
W	EUR	9	22153361	G	A	rs7853123	CDKN2B-AS1	0.528157	1.06277	0.008851	1.04542	1.08041	7.25	4.34e-13	12.3623	10.9924	0.358109	0.0902816	11	714850	++?+++++++++
W	EUR	9	22153715	T	A	rs7853621	CDKN2B-AS1	0.539222	1.06272	0.008862	1.04535	1.08038	7.23458	4.86e-13	12.3129	11.3496	0.330939	0.11891	11	714850	++?-++++++++
W	EUR	9	22154010	C	T	rs7045424	CDKN2B-AS1	0.534042	1.06459	0.008866	1.04721	1.08226	7.45362	9.48e-14	13.0231	11.8346	0.296281	0.155018	11	714850	++?+++++++++
W	EUR	9	22155076	A	G	rs12343752	CDKN2B-AS1	0.336017	1.07024	0.009292	1.05203	1.08877	7.75178	9.49e-15	14.0228	27.5516	0.00379	0.60075	12	723937	+-+-+++-++++
W	EUR	9	22155091	A	G	rs7033903	CDKN2B-AS1	0.547796	1.068	0.008855	1.05064	1.08564	7.87007	3.72e-15	14.4299	16.0782	0.138254	0.315842	12	723937	++--++++++++
W	EUR	9	22157361	G	T	rs7028213	CDKN2B-AS1	0.338636	1.06936	0.009257	1.05122	1.08782	7.6807	1.66e-14	13.781	30.2455	0.00145	0.63631	12	723937	+-+-+++-++++
W	EUR	9	22157909	C	A	rs1333052	CDKN2B-AS1	0.329798	1.06728	0.009476	1.04871	1.08618	7.26998	3.75e-13	12.4263	28.9427	0.001273	0.65449	11	704060	+-+-+++-+++?
W	EUR	9	22158308	T	C	rs117914842	CDKN2B-AS1	0.067663	0.90267	0.014981	0.873307	0.93302	-6.06903	1.32e-09	8.87785	14.1701	0.116401	0.364861	10	686420	-+??+----+--
W	EUR	9	22158599	A	G	rs10738611	CDKN2B-AS1	0.541009	1.07007	0.00885	1.05272	1.0877	8.12169	4.83e-16	15.3159	17.187	0.102463	0.359983	12	723937	++-+++++++++
W	EUR	9	22158925	T	C	rs10122243	CDKN2B-AS1	0.404389	1.07617	0.00897	1.05859	1.09404	8.73459	2.59e-18	17.5874	28.6889	0.002536	0.616577	12	723937	+---++++++++
W	EUR	9	22159417	T	C	rs10757288	CDKN2B-AS1	0.548486	1.07384	0.009182	1.05585	1.09215	8.26193	1.51e-16	15.8214	14.6274	0.101691	0.384718	10	675630	++-?+++++++?
W	EUR	9	22159983	A	C	rs10811667	CDKN2B-AS1	0.572716	1.05612	0.00885	1.03878	1.07376	6.46248	1.06e-10	9.9728	10.3983	0.494951	0	12	723937	++--++++++++
W	EUR	9	22160455	G	C	rs10757289	CDKN2B-AS1	0.570414	1.06438	0.008864	1.04701	1.08204	7.43059	1.13e-13	12.9475	16.383	0.127498	0.328571	12	723937	++--++++++++
W	EUR	9	22161213	T	C	rs7864275	CDKN2B-AS1	0.411868	1.07851	0.009114	1.06065	1.09668	8.86986	7.75e-19	18.1104	24.6528	0.006044	0.594366	11	695507	+--?++++++++
W	EUR	9	22161665	T	C	rs10757290	CDKN2B-AS1	0.405287	1.07528	0.008962	1.05772	1.09314	8.63767	6.06e-18	17.2175	29.7973	0.001705	0.630839	12	723937	+---++++++++
W	EUR	9	22161885	A	G	rs10757291	CDKN2B-AS1	0.526392	1.06889	0.008826	1.05159	1.08648	8.00315	1.27e-15	14.8951	18.4259	0.072211	0.403013	12	723937	+--+++++++++
W	EUR	9	22162194	G	T	rs7854623	CDKN2B-AS1	0.336501	1.06956	0.009266	1.0514	1.08804	7.69657	1.46e-14	13.8348	28.6365	0.002584	0.615875	12	723937	+-+-+++-++++
W	EUR	9	22162561	A	G	rs6475616	CDKN2B-AS1	0.547875	1.06738	0.008845	1.05005	1.08501	7.80484	6.24e-15	14.2047	17.3983	0.096635	0.367753	12	723937	++-+++++++++
W	EUR	9	22162795	C	A	rs7041895	CDKN2B-AS1	0.406347	1.07467	0.009095	1.05684	1.09279	8.4379	3.41e-17	16.4677	30.0524	0.00084	0.667248	11	704060	+---+++++++?
W	EUR	9	22164046	G	C	rs12348411	CDKN2B-AS1	0.338416	1.07434	0.009443	1.05583	1.09317	8.0867	6.44e-16	15.191	22.7521	0.0117	0.56048	11	695507	+-+?+++-++++
W	EUR	9	22164310	A	G	rs17694933	CDKN2B-AS1	0.420699	1.07542	0.009062	1.05765	1.09348	8.55678	1.23e-17	16.9118	28.7284	0.001379	0.651913	11	704060	+---+++++++?
W	EUR	9	22165584	T	C	rs1333054	CDKN2B-AS1	0.339159	1.07378	0.009587	1.05499	1.09291	7.90312	2.85e-15	14.5447	22.0053	0.008862	0.591007	10	675630	+-+?+++-+++?
W	EUR	9	22166462	T	A	rs6475617	CDKN2B-AS1	0.340018	1.07605	0.009466	1.0575	1.09493	8.26027	1.53e-16	15.8154	21.9547	0.015337	0.544516	11	695507	+-+?+++-++++
W	EUR	9	22166770	T	C	rs2779748	CDKN2B-AS1	0.406837	0.944932	0.007976	0.929299	0.960828	-6.65474	2.94e-11	10.5318	10.1063	0.520852	0	12	723937	--+---------
W	EUR	9	22166972	T	A	rs828579	CDKN2B-AS1	0.406746	0.945262	0.007982	0.929616	0.96117	-6.61088	3.95e-11	10.4029	9.91054	0.538452	0	12	723937	--+---------
W	EUR	9	22168129	T	C	rs7863846	CDKN2B-AS1	0.323951	1.07198	0.009544	1.05327	1.09102	7.73887	1.05e-14	13.9787	24.8264	0.005684	0.597203	11	695507	+-+?+++-++++
W	EUR	9	22169701	C	T	rs1537377	CDKN2B-AS1	0.395231	1.07804	0.009336	1.05974	1.09665	8.60316	8.19e-18	17.0867	22.7705	0.006733	0.604751	10	675630	+--?+++++++?
W	EUR	9	22170984	A	C	rs954399	CDKN2B-AS1	0.321007	1.07148	0.009568	1.05272	1.09057	7.66303	1.9e-14	13.7213	23.7614	0.008259	0.57915	11	695507	+-+?+++-++++
W	EUR	9	22171485	T	G	rs2779747	CDKN2B-AS1/DMRTA1	0.570469	0.926458	0.007811	0.911148	0.942025	-8.98499	2.74e-19	18.5618	23.2647	0.00981	0.570165	11	695507	-++?--------
W	EUR	9	22172260	T	A	rs828582	CDKN2B-AS1/DMRTA1	0.572806	0.926983	0.007827	0.911642	0.942581	-8.90548	5.63e-19	18.2495	22.8722	0.011228	0.562789	11	695507	-++?--------
W	EUR	9	22172894	C	T	rs10811669	CDKN2B-AS1/DMRTA1	0.392213	1.07729	0.009206	1.05925	1.09564	8.63946	5.97e-18	17.2243	21.2886	0.019168	0.530266	11	695507	+--?++++++++
W	EUR	9	22173076	A	T	rs9987548	CDKN2B-AS1/DMRTA1	0.392384	1.07671	0.009195	1.05868	1.09504	8.5813	9.9e-18	17.0042	22.2515	0.013873	0.550593	11	695507	+--?++++++++
W	EUR	9	22173408	T	C	rs1981046	CDKN2B-AS1/DMRTA1	0.573504	0.926831	0.007961	0.911227	0.942702	-8.77133	1.87e-18	17.7287	22.2184	0.008212	0.594931	10	675630	-++?-------?
W	EUR	9	22173677	G	A	rs9987689	CDKN2B-AS1/DMRTA1	0.301592	1.0656	0.00958	1.04682	1.08472	7.00471	2.57e-12	11.5897	24.9621	0.005418	0.599393	11	714850	+-?-+++++++-
W	EUR	9	22177528	T	G	rs1095899	CDKN2B-AS1/DMRTA1	0.305247	1.05984	0.009479	1.04126	1.07875	6.44111	1.23e-10	9.91164	30.9921	0.001105	0.645071	12	723937	+---+++++++-
W	EUR	9	22177678	C	T	rs1095900	CDKN2B-AS1/DMRTA1	0.539145	1.05597	0.0091	1.03813	1.07411	6.26535	3.84e-10	9.41598	18.9696	0.025452	0.525558	10	645497	++--?++++?+-
W	EUR	9	22179702	A	G	rs1095901	CDKN2B-AS1/DMRTA1	0.378942	1.0491	0.009084	1.03129	1.06721	5.4883	4.15e-08	7.38152	22.9912	0.010779	0.565051	11	704060	+---+++++++?
W	EUR	9	22180265	C	A	rs7469871	CDKN2B-AS1/DMRTA1	0.632382	1.05064	0.009369	1.03228	1.06933	5.49132	4.08e-08	7.38895	18.5466	0.029337	0.514735	10	645497	++--?++++?+-
W	EUR	9	22180330	C	T	rs7467383	CDKN2B-AS1/DMRTA1	0.629244	1.05097	0.009345	1.03266	1.06961	5.54208	3.06e-08	7.51412	17.2106	0.045519	0.477065	10	645497	++--?++++?+-
W	EUR	9	22181188	G	A	rs2483125	CDKN2B-AS1/DMRTA1	0.630116	1.04943	0.00897	1.03184	1.06731	5.59662	2.24e-08	7.64981	19.7771	0.048493	0.443802	12	723937	++--+++++++-
W	EUR	9	22181678	T	A	rs7470695	CDKN2B-AS1/DMRTA1	0.602844	1.05243	0.009233	1.03433	1.07085	5.77463	7.92e-09	8.10147	18.1246	0.033755	0.503438	10	645497	++--?++++?+-
W	EUR	9	22182940	G	A	rs828578	CDKN2B-AS1/DMRTA1	0.60535	1.05288	0.008888	1.03546	1.07059	6.05366	1.46e-09	8.8364	18.405	0.072647	0.402335	12	723937	++-++++++++-
W	EUR	9	22183782	T	C	rs866666	CDKN2B-AS1/DMRTA1	0.605185	1.05622	0.009052	1.03848	1.07426	6.32787	2.57e-10	9.59079	15.7759	0.10623	0.366121	11	704060	++-++++++++?
W	EUR	9	22184019	C	T	rs852700	CDKN2B-AS1/DMRTA1	0.608131	1.05534	0.008916	1.03787	1.07311	6.32258	2.66e-10	9.57593	16.5492	0.121936	0.335315	12	723937	++-++++++++-
W	EUR	9	22185093	G	A	rs864347	CDKN2B-AS1/DMRTA1	0.605868	1.05306	0.008883	1.03565	1.07076	6.07863	1.25e-09	8.90377	18.3652	0.073485	0.40104	12	723937	++--+++++++-
W	EUR	9	22187435	T	C	rs1095906	CDKN2B-AS1/DMRTA1	0.606879	1.05365	0.008894	1.03622	1.07138	6.1402	8.49e-10	9.07103	20.1177	0.043753	0.453217	12	723937	++--+++++++-
W	EUR	9	22188084	G	A	rs1095897	CDKN2B-AS1/DMRTA1	0.61245	1.05474	0.008936	1.03722	1.07255	6.23728	4.59e-10	9.33803	18.3204	0.074437	0.399578	12	723937	++--+++++++-
W	EUR	9	22191190	C	T	rs828576	CDKN2B-AS1/DMRTA1	0.606674	1.05413	0.008902	1.03669	1.07187	6.19094	6.16e-10	9.21009	19.4298	0.053801	0.433859	12	723937	++--+++++++-
W	EUR	9	22195322	G	A	rs1679029	CDKN2B-AS1/DMRTA1	0.591628	1.0587	0.009246	1.04058	1.07714	6.47523	9.79e-11	10.0094	14.5917	0.147673	0.314678	11	704060	++-++++++++?
W	EUR	9	22195357	C	T	rs1751446	CDKN2B-AS1/DMRTA1	0.605088	1.05278	0.008885	1.03536	1.07048	6.04319	1.56e-09	8.80822	18.5151	0.070372	0.405892	12	723937	++--+++++++-
W	EUR	9	22195773	T	C	rs1751447	CDKN2B-AS1/DMRTA1	0.605951	1.05364	0.008895	1.03621	1.07137	6.13771	8.62e-10	9.06425	17.7623	0.087261	0.380713	12	723937	++--+++++++-
W	EUR	9	133278431	C	T	rs651007	LOC112679202/LOC112637023	0.783063	0.944774	0.009635	0.925889	0.964043	-5.51486	3.57e-08	7.44686	12.9095	0.166743	0.302841	10	675630	---?--+++--?
W	EUR	9	133278724	T	C	rs579459	LOC112637023	0.783082	0.94459	0.00963	0.925715	0.96385	-5.5354	3.18e-08	7.49759	13.073	0.159329	0.31156	10	675630	---?--+++--?
W	EUR	9	133279294	G	T	rs495828	LOC112637023/LCN1P2	0.782792	0.944455	0.009624	0.925592	0.963702	-5.55202	2.89e-08	7.53876	13.0461	0.160532	0.310137	10	675630	---?--+++--?
W	EUR	9	133279427	C	T	rs635634	LOC112637023/LCN1P2	0.804926	0.942915	0.009991	0.923333	0.962912	-5.48963	4.12e-08	7.3848	17.804	0.037517	0.494495	10	675630	---?--+++--?
W	EUR	10	88294511	A	G	rs11202702	RNLS	0.433513	1.04984	0.008761	1.03267	1.0673	5.78082	7.63e-09	8.1174	13.9527	0.235624	0.211619	12	723937	+--++++-++++
W	EUR	10	88295142	C	T	rs11202704	RNLS	0.287969	1.05972	0.009543	1.04102	1.07876	6.38404	1.78e-10	9.74927	22.0067	0.024321	0.500153	12	723937	+---+++-++++
W	EUR	10	88307548	A	G	rs2312538	RNLS	0.28414	1.05827	0.009542	1.03957	1.07731	6.22568	4.94e-10	9.30591	23.5024	0.015002	0.531963	12	723937	+---+++-++-+
W	EUR	10	88312595	C	T	rs10509543	RNLS	0.298533	1.05965	0.009692	1.04066	1.079	6.27787	3.54e-10	9.45085	21.8325	0.009425	0.58777	10	675630	+--?+++-+++?
W	EUR	10	88314248	G	A	rs11202709	RNLS	0.286359	1.05883	0.009509	1.04019	1.0778	6.30857	2.91e-10	9.53666	23.4727	0.015149	0.53137	12	723937	+---+++-++++
W	EUR	10	88319957	T	G	rs10887801	RNLS	0.439435	1.05144	0.008965	1.03387	1.06931	5.83441	5.54e-09	8.25615	14.1544	0.116936	0.364157	10	675630	+--?+++-+++?
W	EUR	10	88322643	T	C	rs1582783	RNLS	0.284023	1.05927	0.00954	1.04057	1.07831	6.33711	2.42e-10	9.61676	24.0408	0.012562	0.542444	12	723937	+---+++-++++
W	EUR	10	88322989	A	C	rs1582784	RNLS	0.423141	1.04971	0.008734	1.03259	1.06711	5.78314	7.53e-09	8.12339	16.5458	0.122048	0.335177	12	723937	+---+++-++++
W	EUR	10	88323430	A	G	rs11202712	RNLS	0.426138	1.04942	0.008726	1.03231	1.0668	5.75322	8.99e-09	8.04643	14.5788	0.202605	0.245477	12	723937	+---+++-++++
W	EUR	10	88323588	T	C	rs11202713	RNLS	0.426693	1.04953	0.008727	1.03242	1.06692	5.7663	8.32e-09	8.08003	14.7589	0.193805	0.254685	12	723937	+---+++-++++
W	EUR	10	88329669	C	T	rs10887804	RNLS	0.425106	1.05079	0.00874	1.03366	1.06821	5.90743	3.57e-09	8.44715	16.6027	0.120188	0.337458	12	723937	+---+++-++++
W	EUR	10	88329768	A	G	rs11202717	RNLS	0.285525	1.05837	0.009512	1.03973	1.07735	6.25635	4.06e-10	9.39097	24.7719	0.009844	0.555949	12	723937	+---+++-++-+
W	EUR	10	88331783	T	C	rs1426619	RNLS	0.428236	1.04986	0.008727	1.03276	1.06725	5.80567	6.58e-09	8.1816	15.7273	0.151559	0.300581	12	723937	+---+++-++++
W	EUR	10	88333137	T	C	rs61855363	RNLS	0.286571	1.06006	0.00952	1.0414	1.07905	6.43681	1.26e-10	9.89935	24.0511	0.012519	0.542641	12	723937	+---+++-++++
W	EUR	10	88333541	T	C	rs11594050	RNLS	0.28948	1.05993	0.009494	1.04132	1.07886	6.44039	1.23e-10	9.90957	22.1806	0.023011	0.504072	12	723937	+---+++-++++
W	EUR	10	88333757	C	G	rs7089911	RNLS	0.430695	1.05312	0.008953	1.03558	1.07097	6.03768	1.61e-09	8.79341	14.6005	0.102509	0.383585	10	694973	+-?-+++-+++?
W	EUR	10	88342646	T	G	rs55894538	RNLS	0.285702	1.0568	0.009506	1.03817	1.07576	6.08742	1.18e-09	8.92755	25.5864	0.007474	0.570084	12	723937	+---+++-++-+
W	EUR	10	88344948	G	A	rs11202727	RNLS	0.287269	1.05957	0.009513	1.04093	1.07855	6.3884	1.73e-10	9.76161	24.2007	0.011913	0.545467	12	723937	+---+++-++++
W	EUR	10	88350500	G	C	rs11202728	RNLS	0.286205	1.05387	0.009844	1.03458	1.07353	5.56575	2.67e-08	7.57285	20.3516	0.015862	0.557774	10	645497	+---?++-+?-+
W	EUR	10	88351782	C	A	rs11202730	RNLS	0.286756	1.054	0.009842	1.03471	1.07365	5.58039	2.46e-08	7.6093	19.9132	0.018455	0.548039	10	645497	+---?++-+?-+
W	EUR	10	88353017	T	C	rs11492684	RNLS	0.288352	1.05872	0.009501	1.0401	1.07768	6.30273	3.02e-10	9.52031	25.4409	0.007853	0.567626	12	723937	+---+++-++-+
W	EUR	10	88353411	G	T	rs4586059	RNLS	0.289441	1.05915	0.009497	1.04054	1.0781	6.35301	2.18e-10	9.66155	24.0541	0.012507	0.542698	12	723937	+---+++-++-+
W	EUR	10	88355926	A	C	rs56155841	RNLS	0.288533	1.05922	0.009505	1.04059	1.07818	6.35452	2.16e-10	9.66581	24.5452	0.010621	0.551847	12	723937	+---+++-++-+
W	EUR	10	88356025	A	G	rs61855396	RNLS	0.293192	1.06056	0.009474	1.04199	1.07946	6.52441	7.06e-11	10.1511	28.1607	0.003059	0.609384	12	723937	+---+++-++-+
W	EUR	10	88356599	G	A	rs17424682	RNLS	0.286728	1.05944	0.009543	1.04073	1.07848	6.35311	2.18e-10	9.66183	22.0865	0.023712	0.501958	12	723937	+---+++-++++
W	EUR	10	88366912	G	C	rs10887809	RNLS	0.683454	0.943688	0.008349	0.927324	0.960341	-6.49412	8.64e-11	10.0637	23.5472	0.014783	0.532853	12	723937	-++----+----
W	EUR	10	88371288	C	G	rs3891323	RNLS	0.289418	1.06029	0.009508	1.04166	1.07926	6.47083	1.01e-10	9.99675	24.1199	0.012237	0.543945	12	723937	+---+++-++-+
W	EUR	10	88373819	T	C	rs792221	RNLS	0.682656	0.943887	0.008344	0.927532	0.960531	-6.47554	9.77e-11	10.0103	23.3678	0.015679	0.529266	12	723937	-++----+----
W	EUR	10	88374613	C	T	rs792220	RNLS	0.683294	0.94427	0.008354	0.927897	0.960932	-6.42549	1.36e-10	9.86706	23.9705	0.012858	0.541103	12	723937	-+++---+----
W	EUR	10	88378991	A	G	rs11202735	RNLS	0.289183	1.06012	0.00951	1.04148	1.07909	6.4505	1.15e-10	9.93849	23.9981	0.012741	0.54163	12	723937	+---+++-++++
W	EUR	10	88379998	T	C	rs61855400	RNLS	0.289108	1.06039	0.009662	1.04146	1.07968	6.37817	1.85e-10	9.73262	23.1132	0.010336	0.567347	11	704060	+---+++-+++?
W	EUR	10	88382446	T	A	rs11202736	RNLS	0.293787	1.06104	0.009474	1.04247	1.07994	6.57725	4.96e-11	10.3046	25.5437	0.007584	0.569365	12	723937	+---+++-++++
W	EUR	10	88383900	C	T	rs1648520	RNLS	0.590584	0.940782	0.007887	0.925324	0.956498	-7.22164	5.35e-13	12.2716	29.005	0.002266	0.620756	12	723937	-+-----+----
W	EUR	10	88391080	T	C	rs796945	RNLS	0.610769	0.939377	0.007945	0.923805	0.955211	-7.33296	2.35e-13	12.6294	28.2677	0.002945	0.610863	12	723937	-+-----+----
W	EUR	10	88391264	G	A	rs792234	RNLS	0.60911	0.940467	0.007943	0.9249	0.956297	-7.20744	5.94e-13	12.2264	25.8854	0.00675	0.57505	12	723937	-+-----+----
W	EUR	10	88391636	A	T	rs1774973	RNLS	0.45281	0.952183	0.007947	0.936606	0.968019	-5.82233	5.96e-09	8.22477	12.988	0.224346	0.230056	11	714850	--?----++---
W	EUR	10	88391641	T	A	rs1648511	RNLS	0.452893	0.952321	0.007948	0.936742	0.96816	-5.80514	6.6e-09	8.18022	12.8947	0.22962	0.224486	11	714850	--?----++---
W	EUR	10	88392328	G	A	rs1067839	RNLS	0.602322	0.942712	0.007947	0.927135	0.95855	-6.94001	4.07e-12	11.3902	30.1579	0.001497	0.635253	12	723937	-++----++---
W	EUR	10	88392383	T	A	rs1067840	RNLS	0.602211	0.943184	0.007953	0.927597	0.959034	-6.87971	6.23e-12	11.2058	30.1004	0.001528	0.634556	12	723937	-++----++---
W	EUR	10	88392612	G	A	rs792235	RNLS	0.591541	0.944464	0.007918	0.928944	0.960243	-6.75916	1.44e-11	10.842	27.309	0.004126	0.597202	12	723937	-++----++---
W	EUR	10	88393297	T	C	rs1086837	RNLS	0.567887	0.947309	0.008218	0.931201	0.963695	-6.18643	6.34e-10	9.19769	19.3343	0.022496	0.534506	10	645497	-++-?--++?--
W	EUR	10	88394417	T	A	rs4934399	RNLS	0.556813	0.947757	0.00819	0.931705	0.964086	-6.15643	7.67e-10	9.1154	17.9459	0.035806	0.498494	10	645497	-++-?--++?--
W	EUR	10	88394520	T	C	rs792236	RNLS	0.553446	0.946456	0.00817	0.930443	0.962744	-6.32129	2.68e-10	9.57231	20.3741	0.015739	0.558263	10	645497	-++-?--++?--
W	EUR	10	88394779	G	T	rs792237	RNLS	0.568417	0.94639	0.008211	0.930296	0.962763	-6.29645	3.14e-10	9.50273	19.6398	0.02027	0.541747	10	645497	-++-?--++?--
W	EUR	10	88394916	C	A	rs792238	RNLS	0.56843	0.946335	0.008211	0.930242	0.962707	-6.30312	3.01e-10	9.5214	19.4574	0.021573	0.537451	10	645497	-++-?--++?--
W	EUR	10	88395398	G	T	rs10887813	RNLS	0.557497	0.943739	0.007955	0.928147	0.959592	-6.81294	9.92e-12	11.0035	21.9642	0.015288	0.544714	11	704060	-++----++--?
W	EUR	10	88396626	C	T	rs811558	RNLS	0.554769	0.942252	0.007809	0.926945	0.957811	-7.11849	1.14e-12	11.9449	25.2614	0.008346	0.564552	12	723937	-++----++---
W	EUR	10	88397097	C	A	rs1935584	RNLS	0.591146	0.944386	0.007913	0.928876	0.960154	-6.77284	1.31e-11	10.8829	26.3939	0.005668	0.583237	12	723937	-++----++---
W	EUR	10	88398173	T	C	rs2488270	RNLS	0.553124	0.943166	0.007816	0.927847	0.958737	-7.0038	2.59e-12	11.5868	26.5039	0.005457	0.584967	12	723937	-++----++---
W	EUR	10	88398851	T	C	rs1617881	RNLS	0.552634	0.944347	0.007947	0.928772	0.960184	-6.74848	1.55e-11	10.81	25.9985	0.003742	0.615362	11	704060	-++----++--?
W	EUR	10	88400266	G	A	rs2433340	RNLS	0.58801	0.943625	0.007891	0.928159	0.959348	-6.88214	6.12e-12	11.2132	29.1056	0.002186	0.622066	12	723937	-++----++---
W	EUR	10	88400635	T	C	rs792230	RNLS	0.554761	0.941951	0.007803	0.926657	0.957499	-7.15991	8.4e-13	12.0755	25.0605	0.008932	0.561063	12	723937	-++----++---
W	EUR	10	88404721	A	C	rs1342451	RNLS	0.553208	0.942078	0.007815	0.92676	0.957649	-7.13381	1.02e-12	11.9931	25.2456	0.008391	0.564281	12	723937	-++----++---
W	EUR	10	88407232	T	C	rs792205	RNLS	0.553228	0.942038	0.007813	0.926725	0.957604	-7.14081	9.66e-13	12.0152	24.6972	0.010094	0.554606	12	723937	-++----++---
W	EUR	10	88407308	C	A	rs792207	RNLS	0.583821	0.942049	0.008079	0.926215	0.958153	-6.90284	5.29e-12	11.2764	24.5735	0.003481	0.633751	10	675630	-++?---++--?
W	EUR	10	88407554	G	C	rs792208	RNLS	0.6003	0.942438	0.007948	0.926859	0.958279	-6.97104	3.27e-12	11.4856	29.4128	0.001958	0.626013	12	723937	-+-----++---
W	EUR	10	88408432	G	T	rs813782	RNLS	0.589563	0.944563	0.007922	0.929036	0.960349	-6.74422	1.59e-11	10.7973	26.1743	0.006113	0.579741	12	723937	-+-----++---
W	EUR	10	88408610	T	C	rs792209	RNLS	0.553337	0.942176	0.007813	0.926863	0.957742	-7.12453	1.09e-12	11.9639	24.4398	0.011001	0.549914	12	723937	-++----++---
W	EUR	10	88412455	T	G	rs792211	RNLS	0.589238	0.944351	0.00792	0.928828	0.960134	-6.77072	1.33e-11	10.8766	26.2702	0.005915	0.581274	12	723937	-+-----++---
W	EUR	10	88413779	G	A	rs814242	RNLS	0.58935	0.94452	0.007923	0.928992	0.960308	-6.74876	1.55e-11	10.8109	25.9657	0.006567	0.576364	12	723937	-+-----++---
W	EUR	10	88414396	T	C	rs792212	RNLS	0.553299	0.942533	0.007814	0.927218	0.958101	-7.08079	1.49e-12	11.8266	24.9837	0.009167	0.559713	12	723937	-++----++---
W	EUR	10	88414445	C	A	rs792213	RNLS	0.567034	0.941658	0.007846	0.92628	0.957292	-7.15533	8.69e-13	12.0611	24.8653	0.00954	0.557617	12	723937	-++----++---
W	EUR	10	88414825	C	G	rs792214	RNLS	0.589304	0.944679	0.007924	0.929148	0.96047	-6.7285	1.78e-11	10.7504	26.1371	0.006192	0.579143	12	723937	-+-----++---
W	EUR	10	88415549	C	A	rs792215	RNLS	0.599295	0.943588	0.008081	0.927749	0.959697	-6.72293	1.85e-11	10.7338	29.0958	0.001202	0.656308	11	704060	-+-----++--?
W	EUR	10	88415705	C	T	rs806694	RNLS	0.589309	0.944854	0.007925	0.92932	0.960647	-6.70688	2.06e-11	10.6861	25.9605	0.006578	0.57628	12	723937	-+-----++---
W	EUR	10	88417277	A	T	rs4933480	RNLS	0.567039	0.941546	0.007845	0.926169	0.957177	-7.16973	7.82e-13	12.1066	24.7667	0.009861	0.555855	12	723937	-++----++---
W	EUR	10	88418234	C	T	rs10736351	RNLS	0.600403	0.943443	0.007959	0.927843	0.959305	-6.84393	7.99e-12	11.0972	29.5699	0.001851	0.628	12	723937	-+-----++---
W	EUR	10	88419435	T	C	rs4934403	RNLS	0.553044	0.942503	0.007815	0.927186	0.958073	-7.08361	1.46e-12	11.8354	25.1302	0.008725	0.56228	12	723937	-++----++---
W	EUR	10	88422710	G	T	rs6586132	RNLS	0.586167	0.94391	0.007903	0.928421	0.959658	-6.83785	8.34e-12	11.0788	28.828	0.002414	0.618426	12	723937	-++----++---
W	EUR	10	88423007	C	T	rs7907732	RNLS	0.586089	0.94353	0.007899	0.928048	0.959271	-6.88578	5.97e-12	11.2243	28.3495	0.002861	0.611986	12	723937	-++----++---
W	EUR	10	88423206	A	G	rs10887817	RNLS	0.566768	0.941517	0.007846	0.92614	0.95715	-7.17256	7.66e-13	12.1156	24.7001	0.010084	0.554658	12	723937	-++----++---
W	EUR	10	88423281	A	G	rs7918921	RNLS	0.569095	0.941732	0.007907	0.926234	0.95749	-7.09088	1.39e-12	11.8582	24.4983	0.006382	0.591808	11	695507	-++?---++---
W	EUR	10	88423345	T	C	rs10887818	RNLS	0.552983	0.942227	0.007813	0.926913	0.957794	-7.11793	1.14e-12	11.9431	24.6828	0.010142	0.554346	12	723937	-++----++---
W	EUR	10	88426090	T	G	rs4934404	RNLS	0.618047	0.942219	0.008062	0.926417	0.95829	-6.89734	5.5e-12	11.2596	30.6295	0.000675	0.673518	11	695507	-+-?---++---
W	EUR	10	88426366	C	T	rs7921352	RNLS	0.601702	0.941393	0.00795	0.925811	0.957238	-7.0921	1.37e-12	11.862	30.3591	0.001391	0.63767	12	723937	-+-----++---
W	EUR	10	88427355	G	A	rs10788598	RNLS	0.600741	0.943029	0.00796	0.927427	0.958894	-6.89151	5.73e-12	11.2418	30.6129	0.001269	0.640674	12	723937	-+-----++---
W	EUR	10	88428167	A	G	rs10788599	RNLS	0.600623	0.942756	0.007955	0.927164	0.958611	-6.9276	4.45e-12	11.3521	30.6165	0.001267	0.640716	12	723937	-+-----++---
W	EUR	10	88428210	A	G	rs7909697	RNLS	0.600797	0.942761	0.007958	0.927164	0.95862	-6.92523	4.52e-12	11.3449	30.6989	0.00123	0.641681	12	723937	-+-----++---
W	EUR	10	88428270	G	C	rs7910594	RNLS	0.60064	0.94285	0.007956	0.927255	0.958707	-6.91573	4.83e-12	11.3158	30.6062	0.001272	0.640595	12	723937	-+-----++---
W	EUR	10	88430862	C	T	rs10788600	RNLS	0.60075	0.943001	0.00796	0.927399	0.958865	-6.89502	5.59e-12	11.2525	30.9227	0.001133	0.644275	12	723937	-+-----++---
W	EUR	10	88431192	C	T	rs7911996	RNLS	0.60073	0.943174	0.007961	0.92757	0.959041	-6.8734	6.51e-12	11.1867	30.9153	0.001136	0.644189	12	723937	-+-----++---
W	EUR	10	88439452	C	T	rs10887821	RNLS	0.60426	0.94496	0.007988	0.929304	0.960881	-6.64146	3.22e-11	10.4927	31.6031	0.000883	0.651933	12	723937	-++----++---
W	EUR	10	88441885	A	G	rs2096194	RNLS	0.604762	0.944869	0.007993	0.929203	0.960798	-6.6483	3.07e-11	10.5128	30.8703	0.001155	0.64367	12	723937	-+-----++---
W	EUR	10	88442968	A	G	rs6586134	RNLS	0.542598	0.94813	0.007859	0.932727	0.963787	-6.37382	1.9e-10	9.72034	19.5636	0.051697	0.437732	12	723937	-++----++---
W	EUR	10	88443722	T	A	rs4606392	RNLS	0.604408	0.94539	0.007996	0.929717	0.961327	-6.58424	4.73e-11	10.325	30.8374	0.001169	0.64329	12	723937	-+-----++---
W	EUR	10	88444143	C	T	rs7922551	RNLS	0.604393	0.945154	0.007994	0.929485	0.961088	-6.61339	3.89e-11	10.4102	31.1142	0.001056	0.646463	12	723937	-+-----++---
W	EUR	10	88444969	C	T	rs4509673	RNLS	0.604108	0.945073	0.007993	0.929406	0.961004	-6.62392	3.62e-11	10.4411	31.1786	0.001032	0.647194	12	723937	-+-----++---
W	EUR	10	88445130	C	T	rs2872092	RNLS	0.604102	0.945408	0.007997	0.929735	0.961346	-6.58192	4.81e-11	10.3182	30.8729	0.001154	0.6437	12	723937	-+-----++---
W	EUR	10	88445442	C	A	rs4596981	RNLS	0.601167	0.950055	0.008411	0.93357	0.966831	-5.73717	9.88e-09	8.0053	22.8322	0.003587	0.649617	9	636410	-+?-?--++?--
W	EUR	10	88445582	A	C	rs4619060	RNLS	0.601692	0.950381	0.008366	0.933983	0.967066	-5.73142	1.02e-08	7.99061	22.9798	0.006242	0.608352	10	645497	-+--?--++?--
W	EUR	10	88446541	C	T	rs10736352	RNLS	0.600431	0.944428	0.007975	0.928796	0.960322	-6.71466	1.95e-11	10.7092	30.0132	0.001577	0.633494	12	723937	-+-----++---
W	EUR	10	88446781	C	T	rs10736354	RNLS	0.600904	0.949922	0.00836	0.933537	0.966594	-5.78736	7.34e-09	8.13429	23.8664	0.004518	0.6229	10	645497	-+--?--++?--
W	EUR	10	88449015	G	A	rs10749589	RNLS	0.600327	0.944373	0.007974	0.928744	0.960266	-6.72189	1.86e-11	10.7307	29.9358	0.001622	0.632547	12	723937	-+-----++---
W	EUR	10	88449183	A	T	rs10788602	RNLS	0.604054	0.945377	0.007996	0.929705	0.961312	-6.58643	4.66e-11	10.3314	30.9628	0.001117	0.644735	12	723937	-+-----++---
W	EUR	10	88450426	G	A	rs10887823	RNLS	0.604493	0.945031	0.007995	0.929361	0.960965	-6.62749	3.53e-11	10.4516	31.1568	0.00104	0.646947	12	723937	-+-----++---
W	EUR	10	88450754	A	G	rs1935579	RNLS	0.604488	0.945136	0.007996	0.929464	0.961071	-6.61467	3.85e-11	10.414	31.1933	0.001026	0.64736	12	723937	-+-----++---
W	EUR	10	88451407	T	C	rs10749590	RNLS	0.604554	0.945175	0.007997	0.929501	0.961114	-6.60874	4.01e-11	10.3966	31.0409	0.001085	0.645629	12	723937	-+-----++---
W	EUR	10	88451473	G	A	rs10887824	RNLS	0.604506	0.945306	0.007998	0.92963	0.961247	-6.59238	4.48e-11	10.3487	30.8995	0.001143	0.644008	12	723937	-+-----++---
W	EUR	10	88452058	T	A	rs7899828	RNLS	0.600729	0.943984	0.007974	0.928355	0.959877	-6.76739	1.36e-11	10.8666	30.0721	0.001544	0.634212	12	723937	-+-----++---
W	EUR	10	88454315	G	A	rs1342456	RNLS	0.603661	0.945986	0.008126	0.93006	0.962185	-6.40994	1.5e-10	9.82279	30.5579	0.000694	0.672752	11	704060	-+-----++--?
W	EUR	10	88454522	A	T	rs10749591	RNLS	0.604498	0.944927	0.007996	0.929256	0.960863	-6.639	3.27e-11	10.4854	31.1846	0.00103	0.647262	12	723937	-+-----++---
W	EUR	10	88455872	C	T	rs6586139	RNLS	0.60476	0.945459	0.007999	0.929781	0.961402	-6.57391	5.07e-11	10.2949	30.7664	0.0012	0.642467	12	723937	-+-----++---
W	EUR	10	88456297	T	A	rs4934409	RNLS	0.604733	0.945385	0.007999	0.929707	0.961327	-6.58262	4.78e-11	10.3202	30.8654	0.001157	0.643614	12	723937	-+-----++---
W	EUR	10	88456728	C	T	rs2312610	RNLS	0.604817	0.945462	0.007999	0.929785	0.961404	-6.57378	5.08e-11	10.2945	30.8901	0.001147	0.643898	12	723937	-+-----++---
W	EUR	10	88458581	C	G	rs4934411	RNLS	0.601995	0.944488	0.007985	0.928838	0.960402	-6.69946	2.17e-11	10.6641	30.0592	0.001551	0.634055	12	723937	-+-----++---
W	EUR	10	88463646	G	C	rs1342450	RNLS	0.605667	0.944799	0.008001	0.929117	0.960746	-6.64927	3.05e-11	10.5157	31.5375	0.000905	0.651209	12	723937	-+-----++---
W	EUR	10	88466166	A	C	rs1750274	RNLS	0.388358	1.05254	0.008879	1.03514	1.07023	6.01972	1.8e-09	8.74524	33.4991	0.000437	0.671633	12	723937	+-+++++--+++
W	EUR	10	88471805	G	A	rs1169043	RNLS	0.391837	1.05433	0.008879	1.03693	1.07203	6.23002	4.81e-10	9.31792	33.9935	0.000363	0.676409	12	723937	+-+++++--+++
W	EUR	10	88472755	C	T	rs2185786	RNLS	0.391918	1.05419	0.008879	1.03679	1.07189	6.21412	5.32e-10	9.27397	34.2076	0.000334	0.678434	12	723937	+-+++++--+++
W	EUR	10	88473348	G	T	rs2576181	RNLS	0.391809	1.05404	0.008879	1.03664	1.07174	6.19668	5.94e-10	9.22588	34.3123	0.000322	0.679415	12	723937	+-+++++--+++
W	EUR	10	88475700	C	T	rs2477956	RNLS	0.391743	1.05381	0.008878	1.03641	1.0715	6.1698	7.05e-10	9.15202	34.285	0.000325	0.67916	12	723937	+-+++++--+++
W	EUR	10	88485762	T	A	rs2576176	RNLS	0.371977	1.05177	0.008965	1.0342	1.06964	5.87202	4.42e-09	8.35424	31.8862	0.000795	0.655023	12	723937	+-+++++--+++
W	EUR	10	88486773	C	T	rs2148127	RNLS	0.371893	1.05196	0.008965	1.03439	1.06983	5.89438	3.87e-09	8.41282	32.0128	0.000759	0.656387	12	723937	+-+++++--+++
W	EUR	10	88489188	C	A	rs2437875	RNLS	0.373955	1.05137	0.008957	1.03382	1.06923	5.83136	5.65e-09	8.24821	30.7019	0.001228	0.641716	12	723937	+-+++++--+++
W	EUR	10	88495858	C	T	rs2576172	RNLS	0.373932	1.05194	0.008963	1.03438	1.06981	5.89357	3.88e-09	8.41071	31.1054	0.00106	0.646364	12	723937	+-+++++--+++
W	EUR	10	88497468	C	T	rs2576171	RNLS	0.366184	1.05093	0.008981	1.03332	1.06883	5.76352	8.46e-09	8.07287	33.3437	0.000463	0.670103	12	723937	+-+++++--+++
W	EUR	10	88498987	C	T	rs2576170	RNLS	0.366193	1.05086	0.008979	1.03326	1.06876	5.75738	8.77e-09	8.0571	33.4204	0.00045	0.670859	12	723937	+-+++++--+++
W	EUR	10	88502173	G	A	rs2576169	RNLS	0.368437	1.05008	0.00897	1.0325	1.06797	5.67326	1.44e-08	7.84262	31.2389	0.001009	0.647875	12	723937	+-+++++--+++
W	EUR	10	88504383	C	T	rs2477954	RNLS	0.368192	1.05046	0.008976	1.03287	1.06835	5.71294	1.14e-08	7.94343	32.086	0.000739	0.657172	12	723937	+-+++++--+++
W	EUR	11	30104072	C	G	rs11030946	ARL14EP-DT	0.14685	0.922499	0.011021	0.900899	0.944617	-6.67319	2.59e-11	10.5862	16.4824	0.086631	0.393292	11	714850	-+?----+---+
W	EUR	11	30124183	T	C	rs1436098	ARL14EP-DT	0.412554	0.953064	0.008036	0.937312	0.96908	-5.654	1.61e-08	7.79394	16.6784	0.08179	0.400422	11	714850	-+?+-----+--
W	EUR	11	30124683	C	T	rs11030958	ARL14EP-DT	0.411856	0.953534	0.007988	0.937878	0.969452	-5.63306	1.81e-08	7.74118	16.7901	0.114239	0.344852	12	723937	-+++-----+--
W	EUR	11	30124860	T	C	rs1436099	ARL14EP-DT	0.411293	0.953629	0.007989	0.937971	0.969549	-5.62099	1.95e-08	7.71086	16.645	0.118825	0.33914	12	723937	-+++-----+--
W	EUR	11	30125738	A	C	rs4923621	ARL14EP-DT	0.400475	0.951393	0.008201	0.935318	0.967744	-5.7313	1.02e-08	7.99029	13.713	0.18649	0.270765	11	704060	-++------+-?
W	EUR	11	30133747	G	A	rs597235	ARL14EP-DT	0.574285	1.04801	0.008718	1.03092	1.06538	5.59048	2.32e-08	7.63448	16.53	0.122566	0.334545	12	723937	+---+++++-++
W	EUR	11	30140471	T	A	rs12785501	ARL14EP-DT	0.406104	0.952544	0.008294	0.936288	0.969081	-5.53632	3.16e-08	7.49987	20.3171	0.016053	0.557024	10	645497	-+++?----?--
W	EUR	11	30140597	G	A	rs12790455	ARL14EP-DT	0.407251	0.953053	0.00829	0.936805	0.969583	-5.4809	4.33e-08	7.36338	21.8116	0.009496	0.587375	10	645497	-+++?----?--
W	EUR	11	30141437	A	G	rs12291589	ARL14EP-DT	0.361113	0.952638	0.008148	0.936668	0.96888	-5.62518	1.9e-08	7.72137	26.1125	0.006244	0.578745	12	723937	-+-+-----+--
W	EUR	11	30141466	C	T	rs12272116	ARL14EP-DT	0.361167	0.952572	0.008147	0.936604	0.968813	-5.63325	1.81e-08	7.74167	25.7908	0.006971	0.573491	12	723937	-+-+-----+--
W	EUR	11	30141636	T	A	rs11030966	ARL14EP-DT	0.361115	0.952681	0.008148	0.936711	0.968923	-5.62022	1.95e-08	7.70892	26.1704	0.006121	0.579678	12	723937	-+-+-----+--
W	EUR	11	30142421	A	G	rs10835620	ARL14EP-DT	0.361142	0.952809	0.008149	0.936837	0.969053	-5.60465	2.14e-08	7.6699	26.262	0.005932	0.581143	12	723937	-+-+-----+--
W	EUR	11	30143185	G	A	rs10835621	ARL14EP-DT	0.361125	0.952706	0.008148	0.936736	0.968949	-5.61724	1.99e-08	7.70146	26.048	0.006384	0.577702	12	723937	-+-+-----+--
W	EUR	11	30143725	T	C	rs1819675	ARL14EP-DT	0.36111	0.952751	0.008148	0.936781	0.968993	-5.61227	2.05e-08	7.68898	26.0638	0.006349	0.577959	12	723937	-+-+-----+--
W	EUR	11	30144159	C	T	rs7101406	ARL14EP-DT	0.360369	0.952212	0.008148	0.936242	0.968454	-5.67448	1.43e-08	7.84571	25.4569	0.007811	0.567896	12	723937	-+-+-----+--
W	EUR	11	30144163	G	A	rs475305	ARL14EP-DT	0.361494	0.953003	0.008149	0.937031	0.969248	-5.58209	2.43e-08	7.61354	26.4708	0.00552	0.584448	12	723937	-+-+-----+--
W	EUR	11	30144349	C	T	rs930321	ARL14EP-DT	0.367932	0.947953	0.008355	0.931577	0.964618	-6.01169	1.89e-09	8.72375	13.3413	0.147762	0.325402	10	675630	-+-?-----+-?
W	EUR	11	30144562	C	T	rs930320	ARL14EP-DT	0.361809	0.952007	0.008143	0.936047	0.968239	-5.70188	1.22e-08	7.91526	25.148	0.008672	0.56259	12	723937	-+-+-----+--
W	EUR	11	30144693	T	C	rs1898174	ARL14EP-DT	0.361115	0.952731	0.008147	0.936763	0.968972	-5.61495	2.02e-08	7.69571	25.6953	0.007202	0.571907	12	723937	-+-+-----+--
W	EUR	11	30144844	G	A	rs637542	ARL14EP-DT	0.360521	0.952881	0.008155	0.936897	0.969138	-5.59202	2.3e-08	7.63831	26.3346	0.005785	0.582299	12	723937	-+-+-----+--
W	EUR	11	30144850	A	G	rs10835622	ARL14EP-DT	0.360074	0.952498	0.008154	0.936516	0.968752	-5.63722	1.77e-08	7.75165	25.5605	0.00754	0.569649	12	723937	-+-+-----+--
W	EUR	11	30145081	C	T	rs10835624	ARL14EP-DT	0.361151	0.952701	0.008148	0.936732	0.968943	-5.61803	1.98e-08	7.70344	25.6688	0.007268	0.571464	12	723937	-+-+-----+--
W	EUR	11	30145566	G	T	rs11030968	ARL14EP-DT	0.361336	0.952879	0.008147	0.93691	0.969119	-5.59783	2.22e-08	7.65283	27.0004	0.004595	0.592599	12	723937	-+-+-----+--
W	EUR	11	30145574	A	G	rs11030969	ARL14EP-DT	0.361273	0.952833	0.008147	0.936865	0.969074	-5.60316	2.16e-08	7.66618	26.6923	0.005113	0.587896	12	723937	-+-+-----+--
W	EUR	11	30146040	T	G	rs2460713	ARL14EP-DT	0.360385	0.952282	0.008148	0.936312	0.968525	-5.66635	1.5e-08	7.82514	25.6209	0.007387	0.570663	12	723937	-+-+-----+--
W	EUR	11	30146288	T	C	rs11030970	ARL14EP-DT	0.361176	0.95257	0.008146	0.936603	0.968808	-5.63437	1.8e-08	7.74449	25.2429	0.008399	0.564234	12	723937	-+-+-----+--
W	EUR	11	30146773	T	A	rs11030971	ARL14EP-DT	0.361131	0.952552	0.008147	0.936584	0.968791	-5.63605	1.78e-08	7.74871	25.142	0.00869	0.562485	12	723937	-+-+-----+--
W	EUR	11	30147017	C	A	rs11030972	ARL14EP-DT	0.361138	0.952542	0.008146	0.936577	0.96878	-5.63792	1.76e-08	7.75341	25.8819	0.006758	0.574993	12	723937	-+-+-----+--
W	EUR	11	30147324	T	C	rs4337008	ARL14EP-DT	0.36108	0.952711	0.008147	0.936743	0.968951	-5.61756	1.98e-08	7.70226	25.9739	0.006548	0.576499	12	723937	-+-+-----+--
W	EUR	11	30147651	T	C	rs3858477	ARL14EP-DT	0.361076	0.952717	0.008147	0.936749	0.968957	-5.61679	1.99e-08	7.70032	25.903	0.006709	0.575339	12	723937	-+-+-----+--
W	EUR	11	30148027	C	T	rs11030974	ARL14EP-DT	0.36175	0.952639	0.008273	0.936425	0.969134	-5.53953	3.11e-08	7.50781	24.2589	0.006942	0.587781	11	704060	-+-+-----+-?
W	EUR	11	30148309	A	G	rs663173	ARL14EP-DT	0.368216	0.948379	0.008222	0.932264	0.964772	-6.06151	1.39e-09	8.85754	13.8025	0.182193	0.275493	11	695507	-+-?-----+--
W	EUR	11	30148451	C	T	rs7129554	ARL14EP-DT	0.36123	0.952791	0.008144	0.936828	0.969025	-5.61021	2.07e-08	7.68383	26.1942	0.006071	0.58006	12	723937	-+-+-----+--
W	EUR	11	30148605	T	C	rs588929	ARL14EP-DT	0.361595	0.952974	0.008147	0.937006	0.969214	-5.58693	2.37e-08	7.6256	26.4375	0.005584	0.583925	12	723937	-+-+-----+--
W	EUR	11	30148707	T	C	rs3858478	ARL14EP-DT	0.361111	0.952666	0.008147	0.936698	0.968906	-5.62273	1.93e-08	7.71523	25.9909	0.00651	0.576774	12	723937	-+-+-----+--
W	EUR	11	30148826	C	T	rs3908935	ARL14EP-DT	0.367757	0.947896	0.008217	0.93179	0.964279	-6.12033	9.62e-10	9.01687	13.8185	0.181433	0.276332	11	695507	-+-?-----+--
W	EUR	11	30149290	G	A	rs7114540	ARL14EP-DT	0.361077	0.952749	0.008148	0.936779	0.96899	-5.61252	2.04e-08	7.68963	26.1413	0.006183	0.57921	12	723937	-+-+-----+--
W	EUR	11	30149627	G	C	rs3847633	ARL14EP-DT	0.361089	0.952633	0.008146	0.936666	0.968872	-5.62697	1.88e-08	7.72588	25.9459	0.006611	0.576041	12	723937	-+-+-----+--
W	EUR	11	30150068	T	A	rs3847635	ARL14EP-DT	0.36108	0.952727	0.008147	0.936759	0.968968	-5.61549	2.01e-08	7.69706	26.0409	0.0064	0.577588	12	723937	-+-+-----+--
W	EUR	11	30151032	A	G	rs1890825	ARL14EP-DT	0.361479	0.953413	0.008154	0.937431	0.969666	-5.5315	3.25e-08	7.48792	27.4015	0.003995	0.598562	12	723937	-+-+-----+--
W	EUR	11	30151369	C	A	rs1890826	ARL14EP-DT	0.361778	0.953277	0.00828	0.937048	0.969786	-5.46206	4.82e-08	7.31728	26.141	0.003555	0.617459	11	704060	-+-+-----+-?
W	EUR	11	30151640	C	T	rs12282309	ARL14EP-DT	0.361814	0.953195	0.008279	0.936968	0.969704	-5.47171	4.56e-08	7.34087	25.9618	0.003792	0.614818	11	704060	-+-+-----+-?
W	EUR	11	30152440	T	G	rs10835627	ARL14EP-DT	0.361781	0.953312	0.00828	0.937083	0.969822	-5.45786	4.93e-08	7.30704	26.4638	0.003164	0.622125	11	704060	-+-+-----+-?
W	EUR	11	30152472	T	G	rs10835628	ARL14EP-DT	0.36178	0.953259	0.00828	0.937031	0.969768	-5.46422	4.76e-08	7.32256	26.1704	0.003518	0.617889	11	704060	-+-+-----+-?
W	EUR	11	30152823	T	C	rs10501124	ARL14EP-DT	0.361781	0.953299	0.00828	0.93707	0.969808	-5.45947	4.89e-08	7.31096	26.1853	0.003499	0.618107	11	704060	-+-+-----+-?
W	EUR	11	30152891	T	C	rs10835629	ARL14EP-DT	0.361921	0.953218	0.008277	0.936994	0.969723	-5.47037	4.6e-08	7.33761	25.941	0.00382	0.61451	11	704060	-+-+-----+-?
W	EUR	11	30153120	C	T	rs10501125	ARL14EP-DT	0.361122	0.95284	0.008281	0.936609	0.969351	-5.51128	3.65e-08	7.43804	25.6188	0.004288	0.609662	11	704060	-+-+-----+-?
W	EUR	11	30155196	C	T	rs1340033	ARL14EP-DT	0.361789	0.953182	0.00828	0.936953	0.969691	-5.47282	4.53e-08	7.34361	25.3071	0.004793	0.604855	11	704060	-+-+-----+-?
W	EUR	11	30155247	T	A	rs1938315	ARL14EP-DT	0.361795	0.953208	0.00828	0.936978	0.969718	-5.46965	4.61e-08	7.33585	25.3034	0.004799	0.604796	11	704060	-+-+-----+-?
W	EUR	11	30155332	C	T	rs1340032	ARL14EP-DT	0.359596	0.95186	0.008151	0.935884	0.968109	-5.71292	1.14e-08	7.94338	24.7838	0.009804	0.556162	12	723937	-+-+--------
W	EUR	11	30155463	A	G	rs3858479	ARL14EP-DT	0.36022	0.952026	0.008147	0.936057	0.968267	-5.69641	1.25e-08	7.90136	24.6868	0.010129	0.554418	12	723937	-+-+-----+--
W	EUR	11	30155573	C	T	rs3858480	ARL14EP-DT	0.36111	0.952601	0.008148	0.936631	0.968843	-5.62961	1.85e-08	7.7325	25.267	0.00833	0.56465	12	723937	-+-+-----+--
W	EUR	11	30155720	A	G	rs7113720	ARL14EP-DT	0.361142	0.952555	0.008147	0.936588	0.968795	-5.63565	1.79e-08	7.74769	24.9116	0.009392	0.558439	12	723937	-+-+-----+--
W	EUR	11	30156270	T	C	rs3858481	ARL14EP-DT	0.36034	0.952854	0.008155	0.93687	0.969111	-5.59525	2.26e-08	7.6464	25.4229	0.007902	0.567319	12	723937	-+-+-----+--
W	EUR	11	30156274	C	T	rs3858482	ARL14EP-DT	0.366995	0.948296	0.008227	0.932171	0.964699	-6.06729	1.34e-09	8.87316	14.1803	0.164925	0.294797	11	695507	-+-?-----+--
W	EUR	11	30156293	A	T	rs3858483	ARL14EP-DT	0.360348	0.953131	0.008291	0.936881	0.969663	-5.47136	4.57e-08	7.34003	24.9351	0.00547	0.59896	11	704060	-+-+-----+-?
W	EUR	11	30156918	C	T	rs10835630	ARL14EP-DT	0.361123	0.952653	0.008148	0.936684	0.968894	-5.62371	1.92e-08	7.71767	25.2626	0.008343	0.564573	12	723937	-+-+-----+--
W	EUR	11	30157656	T	C	rs12786317	ARL14EP-DT	0.36127	0.95219	0.008145	0.936226	0.968426	-5.67921	1.39e-08	7.85769	24.2856	0.011581	0.547058	12	723937	-+-+-----+--
W	EUR	11	30158211	T	C	rs3847637	ARL14EP-DT	0.361242	0.952333	0.008147	0.936366	0.968573	-5.66144	1.54e-08	7.81273	25.1348	0.008711	0.562361	12	723937	-+-+-----+--
W	EUR	11	30158402	G	A	rs3858484	ARL14EP-DT	0.361298	0.952069	0.008145	0.936104	0.968306	-5.69288	1.28e-08	7.89239	25.0491	0.008967	0.560862	12	723937	-+-+-----+--
W	EUR	11	30158843	G	A	rs1361424	ARL14EP-DT	0.3632	0.951677	0.008134	0.935734	0.967891	-5.74629	9.36e-09	8.02865	24.7271	0.009993	0.555145	12	723937	-+-+-----+--
W	EUR	11	30159124	G	C	rs1361423	ARL14EP-DT	0.364329	0.951158	0.008127	0.93523	0.967359	-5.81135	6.36e-09	8.1963	23.8768	0.013263	0.539301	12	723937	-+-+-----+--
W	EUR	11	30159138	C	T	rs1361422	ARL14EP-DT	0.364224	0.951189	0.008127	0.935259	0.96739	-5.80756	6.51e-09	8.18648	24.033	0.012595	0.542296	12	723937	-+-+-----+--
W	EUR	11	30159606	T	C	rs892949	ARL14EP-DT	0.364266	0.951188	0.008128	0.935257	0.967391	-5.80704	6.53e-09	8.18514	23.6625	0.014234	0.535129	12	723937	-+-+-----+--
W	EUR	11	30159769	A	G	rs1808771	ARL14EP-DT	0.364946	0.951695	0.008257	0.935511	0.968159	-5.65771	1.57e-08	7.8033	24.239	0.006991	0.587442	11	704060	-+-+-----+-?
W	EUR	11	30160104	G	T	rs12287556	ARL14EP-DT	0.364199	0.951308	0.008129	0.935375	0.967511	-5.79289	7.1e-09	8.14854	24.4352	0.011018	0.54983	12	723937	-+-+-----+--
W	EUR	11	30160124	T	A	rs12293737	ARL14EP-DT	0.36423	0.951161	0.008128	0.935231	0.967362	-5.81062	6.39e-09	8.19441	24.4074	0.011121	0.549318	12	723937	-+-+-----+--
W	EUR	11	30160231	G	A	rs11030982	ARL14EP-DT	0.364286	0.951184	0.008128	0.935253	0.967386	-5.80772	6.5e-09	8.1869	24.053	0.012512	0.542676	12	723937	-+-+-----+--
W	EUR	11	30160521	C	T	rs1340030	ARL14EP-DT	0.3642	0.951321	0.00813	0.935387	0.967527	-5.79042	7.21e-09	8.14218	24.4491	0.010967	0.550086	12	723937	-+-+-----+--
W	EUR	11	30160723	T	A	rs7112118	ARL14EP-DT	0.364252	0.951124	0.008128	0.935193	0.967327	-5.81428	6.25e-09	8.20389	23.7956	0.013623	0.537729	12	723937	-+-+-----+--
W	EUR	11	30160756	C	G	rs7112549	ARL14EP-DT	0.364227	0.951395	0.00813	0.93546	0.967602	-5.78162	7.59e-09	8.11947	24.9073	0.009406	0.558363	12	723937	-+-+-----+--
W	EUR	11	30161797	C	T	rs10835631	ARL14EP-DT	0.364249	0.951152	0.008129	0.935218	0.967357	-5.81034	6.4e-09	8.19369	23.8854	0.013225	0.539468	12	723937	-+-+-----+--
W	EUR	11	30162195	A	T	rs4922833	ARL14EP-DT	0.364387	0.951324	0.008132	0.935385	0.967534	-5.78848	7.29e-09	8.13717	23.8452	0.013402	0.538691	12	723937	-+-+-----+--
W	EUR	11	30162284	G	A	rs4922834	ARL14EP-DT	0.364261	0.951113	0.008129	0.93518	0.967318	-5.81495	6.23e-09	8.20563	23.8741	0.013275	0.53925	12	723937	-+-+-----+--
W	EUR	11	30162936	T	C	rs11030983	ARL14EP-DT	0.364314	0.951138	0.00813	0.935203	0.967344	-5.81159	6.35e-09	8.19693	23.7999	0.013604	0.537812	12	723937	-+-+-----+--
W	EUR	11	30162991	C	T	rs4396264	ARL14EP-DT	0.364367	0.951248	0.008131	0.935311	0.967457	-5.79799	6.89e-09	8.16173	24.042	0.012557	0.542468	12	723937	-+-+-----+--
W	EUR	11	30163313	G	C	rs4313561	ARL14EP-DT	0.364253	0.951002	0.008129	0.935068	0.967207	-5.82776	5.77e-09	8.23887	23.5563	0.014739	0.533033	12	723937	-+-+-----+--
W	EUR	11	30163848	T	G	rs11030985	ARL14EP-DT	0.363568	0.950737	0.008131	0.9348	0.966945	-5.85734	4.83e-09	8.31588	24.0723	0.012432	0.543044	12	723937	-+-+-----+--
W	EUR	11	30163930	C	T	rs11030986	ARL14EP-DT	0.363627	0.951286	0.008133	0.935345	0.967499	-5.79215	7.13e-09	8.14664	26.5996	0.00528	0.58646	12	723937	-+-+-----+--
W	EUR	11	30163939	G	A	rs11030987	ARL14EP-DT	0.364312	0.951121	0.00813	0.935185	0.967327	-5.81347	6.28e-09	8.2018	23.6393	0.014343	0.534673	12	723937	-+-+-----+--
W	EUR	11	30164149	T	C	rs11030988	ARL14EP-DT	0.363572	0.950547	0.008129	0.934614	0.966751	-5.88084	4.19e-09	8.37734	23.6597	0.014247	0.535075	12	723937	-+-+-----+--
W	EUR	11	30164302	C	T	rs11030989	ARL14EP-DT	0.362461	0.95039	0.008139	0.934438	0.966614	-5.89184	3.93e-09	8.40615	22.9666	0.017868	0.521043	12	723937	-+-+-----+--
W	EUR	11	30164303	A	G	rs72885907	ARL14EP-DT	0.36177	0.950165	0.008143	0.934206	0.966397	-5.91491	3.41e-09	8.46682	21.7753	0.026173	0.494841	12	723937	-+-+-----+--
W	EUR	11	30164964	T	C	rs1361421	ARL14EP-DT	0.363532	0.95068	0.008133	0.93474	0.966891	-5.86279	4.68e-09	8.33011	23.3213	0.015919	0.528328	12	723937	-+-+-----+--
W	EUR	11	30165311	G	A	rs1819673	ARL14EP-DT	0.363591	0.950435	0.008131	0.934499	0.966643	-5.89249	3.91e-09	8.40786	22.7846	0.018953	0.517217	12	723937	-+-+-----+--
W	EUR	11	30165497	T	C	rs7102959	ARL14EP-DT	0.363616	0.950718	0.008132	0.93478	0.966928	-5.85887	4.79e-09	8.31987	24.249	0.011723	0.546373	12	723937	-+-+-----+--
W	EUR	11	30165669	C	T	rs552501	ARL14EP-DT	0.363954	0.950914	0.008132	0.934974	0.967124	-5.83597	5.49e-09	8.2602	23.7438	0.013858	0.536721	12	723937	-+-+-----+--
W	EUR	11	30166281	A	G	rs12282113	ARL14EP-DT	0.363965	0.950164	0.008171	0.934148	0.966455	-5.89398	3.87e-09	8.41178	22.4969	0.012764	0.555494	11	714850	-+?+-----+--
W	EUR	11	30166358	T	G	rs12282163	ARL14EP-DT	0.363567	0.950372	0.00813	0.934437	0.966579	-5.90012	3.73e-09	8.4279	22.8133	0.018778	0.517824	12	723937	-+-+-----+--
W	EUR	11	30166411	A	C	rs12282076	ARL14EP-DT	0.363483	0.95047	0.008132	0.934531	0.966681	-5.88725	4.04e-09	8.39411	23.2681	0.016198	0.52725	12	723937	-+-+-----+--
W	EUR	11	30166738	C	G	rs7930471	ARL14EP-DT	0.363583	0.950245	0.008129	0.934312	0.966449	-5.9158	3.39e-09	8.46918	22.6291	0.019928	0.513901	12	723937	-+-+-----+--
W	EUR	11	30166958	C	T	rs7945546	ARL14EP-DT	0.363553	0.950404	0.00813	0.934468	0.966611	-5.89624	3.82e-09	8.41772	23.152	0.016823	0.524878	12	723937	-+-+-----+--
W	EUR	11	30168214	G	A	rs17622950	ARL14EP-DT	0.355825	0.945427	0.00814	0.929471	0.961656	-6.46246	1.06e-10	9.97274	27.8409	0.003424	0.604898	12	723937	-+-+-----+--
W	EUR	11	30168529	G	A	rs1417016	ARL14EP-DT	0.355796	0.945291	0.00814	0.929336	0.961519	-6.47839	9.58e-11	10.0185	27.0219	0.00456	0.592923	12	723937	-+-+-----+--
W	EUR	11	30168592	A	G	rs1417015	ARL14EP-DT	0.355805	0.945489	0.008141	0.929531	0.96172	-6.45452	1.12e-10	9.94999	27.6269	0.003691	0.601837	12	723937	-+-+-----+--
W	EUR	11	30169266	G	T	rs10501121	ARL14EP-DT	0.355832	0.945563	0.008142	0.929604	0.961796	-6.44533	1.19e-10	9.92371	28.1209	0.003102	0.608832	12	723937	-+-+-----+--
W	EUR	11	30169690	T	G	rs7128357	ARL14EP-DT	0.355776	0.945519	0.008143	0.929559	0.961752	-6.45018	1.15e-10	9.93759	27.847	0.003417	0.604984	12	723937	-+-+-----+--
W	EUR	11	30170604	C	T	rs10501122	ARL14EP-DT	0.355717	0.945583	0.008142	0.929624	0.961816	-6.44289	1.21e-10	9.91672	28.5367	0.002677	0.614532	12	723937	-+-+-----+--
W	EUR	11	30170786	T	C	rs11030991	ARL14EP-DT	0.355877	0.945656	0.00814	0.929702	0.961884	-6.43659	1.26e-10	9.89873	28.2356	0.002979	0.61042	12	723937	-+-+-----+--
W	EUR	11	30171415	C	T	rs12793581	ARL14EP-DT	0.355812	0.94545	0.008142	0.929492	0.961682	-6.45876	1.09e-10	9.96214	27.9489	0.003296	0.606425	12	723937	-+-+-----+--
W	EUR	11	30171513	A	G	rs623837	ARL14EP-DT	0.357167	0.945777	0.00814	0.929824	0.962004	-6.4229	1.38e-10	9.85969	26.8649	0.004816	0.590544	12	723937	-+-+-----+--
W	EUR	11	30173995	G	T	rs4923626	ARL14EP-DT	0.357588	0.945585	0.008139	0.929631	0.961812	-6.44506	1.19e-10	9.92293	27.5852	0.003746	0.601235	12	723937	-+-+-----+--
W	EUR	11	30175882	A	G	rs11030992	ARL14EP-DT	0.355456	0.94562	0.00828	0.929391	0.962132	-6.33089	2.52e-10	9.59929	27.5722	0.002113	0.637315	11	704060	-+-+-----+-?
W	EUR	11	30176892	C	T	rs11030993	ARL14EP-DT	0.354822	0.945131	0.008149	0.92916	0.961376	-6.48996	8.88e-11	10.0517	28.257	0.002956	0.610715	12	723937	-+-+-----+--
W	EUR	11	30177473	T	C	rs10767832	ARL14EP-DT	0.356778	0.946026	0.008146	0.93006	0.962266	-6.38932	1.72e-10	9.76423	27.9986	0.003239	0.607124	12	723937	-+-+-----+--
W	EUR	11	30178141	C	A	rs7940816	ARL14EP-DT	0.35684	0.94607	0.008145	0.930106	0.962308	-6.38517	1.77e-10	9.75247	28.8234	0.002418	0.618366	12	723937	-+-+-----+--
W	EUR	11	30178360	C	A	rs7943867	ARL14EP-DT	0.364575	0.950895	0.008134	0.934952	0.967109	-5.83679	5.47e-09	8.26232	23.04	0.017447	0.52257	12	723937	-+-+-----+--
W	EUR	11	30178926	A	G	rs7123331	ARL14EP-DT	0.354813	0.945137	0.008149	0.929164	0.961384	-6.48853	8.96e-11	10.0476	28.4122	0.002798	0.612842	12	723937	-+-+--------
W	EUR	11	30179034	C	T	rs7108968	ARL14EP-DT	0.355081	0.943107	0.008449	0.926548	0.959962	-6.48112	9.41e-11	10.0263	25.3972	0.002562	0.645631	10	645497	-+-+?----?--
W	EUR	11	30179204	C	T	rs7109221	ARL14EP-DT	0.356788	0.946085	0.008146	0.930118	0.962326	-6.38218	1.8e-10	9.74399	28.2259	0.002989	0.610288	12	723937	-+-+-----+--
W	EUR	11	30180243	C	T	rs7113525	ARL14EP-DT	0.356158	0.942294	0.008496	0.925641	0.959246	-6.53378	6.63e-11	10.1783	24.4447	0.001929	0.672731	9	636410	-+?+?----?--
W	EUR	11	30180738	A	G	rs11493214	ARL14EP-DT	0.354715	0.944983	0.008152	0.929005	0.961236	-6.50413	8.08e-11	10.0926	28.2826	0.00293	0.611068	12	723937	-+-+-----+--
W	EUR	11	30181827	A	G	rs7928429	ARL14EP-DT	0.355125	0.942842	0.008452	0.926276	0.959704	-6.5077	7.89e-11	10.1029	24.1721	0.004037	0.627671	10	645497	-+-+?----?--
W	EUR	11	30182278	C	T	rs7943756	ARL14EP-DT	0.356656	0.945516	0.008148	0.929546	0.96176	-6.44633	1.18e-10	9.92658	28.0819	0.003145	0.608288	12	723937	-+-+-----+--
W	EUR	11	30184985	G	A	rs11030997	ARL14EP-DT	0.354747	0.945	0.008159	0.929009	0.961266	-6.49692	8.48e-11	10.0718	28.4204	0.00279	0.612955	12	723937	-+-+-----+--
W	EUR	11	30185692	A	G	rs7122731	ARL14EP-DT	0.354541	0.944784	0.008159	0.928794	0.96105	-6.52167	7.19e-11	10.1432	28.1851	0.003033	0.609722	12	723937	-+-+-----+--
W	EUR	11	30186296	G	A	rs17623478	ARL14EP-DT	0.363463	0.950394	0.008146	0.934428	0.966633	-5.88602	4.07e-09	8.3909	25.0743	0.008891	0.561304	12	723937	-+-+-----+--
W	EUR	11	30186939	C	A	rs10835634	ARL14EP-DT	0.355329	0.944969	0.008174	0.928949	0.961266	-6.48839	8.97e-11	10.0472	28.9193	0.002336	0.619631	12	723937	-+-+-----+--
W	EUR	11	30186969	A	G	rs11030998	ARL14EP-DT	0.354454	0.945274	0.00818	0.929242	0.961583	-6.44869	1.17e-10	9.93332	30.5944	0.001277	0.640457	12	723937	-+-+-----+--
W	EUR	11	30193166	A	G	rs961605	ARL14EP-DT	0.389548	0.952164	0.008032	0.93642	0.968172	-5.76238	8.51e-09	8.06996	27.8333	0.003433	0.60479	12	723937	-+++--++---+
W	EUR	11	30193714	A	T	rs11031002	ARL14EP-DT	0.126679	0.884013	0.011199	0.862063	0.906521	-9.61046	7.7e-22	21.1135	21.9189	0.02501	0.498149	12	723937	-----------+
W	EUR	11	30194459	C	T	rs632939	ARL14EP-DT	0.388975	0.951265	0.008024	0.935538	0.967255	-5.8745	4.36e-09	8.36071	25.7984	0.006953	0.573617	12	723937	-+++--++---+
W	EUR	11	30195456	T	A	rs574096	ARL14EP-DT	0.389792	0.951682	0.008024	0.935954	0.967674	-5.82491	5.87e-09	8.23147	27.061	0.004499	0.593511	12	723937	-+++--++---+
W	EUR	11	30201090	C	T	rs622744	ARL14EP-DT	0.388984	0.950807	0.008016	0.935096	0.966782	-5.93391	3.04e-09	8.51695	25.0809	0.008871	0.56142	12	723937	-++----+---+
W	EUR	11	30202314	A	C	rs606651	ARL14EP-DT	0.388764	0.9506	0.008015	0.93489	0.966573	-5.95885	2.61e-09	8.58299	24.7716	0.009845	0.555944	12	723937	-++----+---+
W	EUR	11	30202319	A	G	rs606642	ARL14EP-DT	0.388781	0.950705	0.008016	0.934994	0.96668	-5.9459	2.83e-09	8.54866	24.4714	0.010886	0.550496	12	723937	-++----+---+
W	EUR	11	30203623	C	G	rs1716021	ARL14EP-DT	0.388969	0.950822	0.008015	0.935113	0.966795	-5.93276	3.06e-09	8.51391	24.9605	0.009239	0.559303	12	723937	-++----+---+
W	EUR	11	30204739	C	T	rs683054	ARL14EP-DT	0.391768	0.947776	0.008101	0.931897	0.963924	-6.22249	5.05e-10	9.29711	17.8875	0.056891	0.440951	11	704060	-+++---+---?
W	EUR	11	30204809	C	T	rs11031005	ARL14EP-DT	0.146991	0.865333	0.010419	0.844911	0.886248	-11.8702	1.84e-32	31.7355	20.9342	0.012946	0.570081	10	675630	---?-------?
W	EUR	11	30204981	A	G	rs11031006	ARL14EP-DT	0.143595	0.866647	0.01035	0.846361	0.887419	-11.8436	2.52e-32	31.5979	21.9262	0.015485	0.543924	11	704060	-----------?
W	EUR	11	30205987	T	C	rs568394	ARL14EP-DT	0.391915	0.95157	0.008011	0.935868	0.967536	-5.84758	5.12e-09	8.29044	24.6579	0.010227	0.553896	12	723937	-+++---+---+
W	EUR	11	30206376	T	A	rs655183	ARL14EP-DT	0.390132	0.951529	0.008016	0.935816	0.967505	-5.8487	5.09e-09	8.29333	25.5312	0.007616	0.569155	12	723937	-+++---+---+
W	EUR	11	30206717	T	C	rs653518	ARL14EP-DT	0.391584	0.951595	0.008012	0.935891	0.967562	-5.84403	5.23e-09	8.28119	24.4222	0.011066	0.549589	12	723937	-+++---+---+
W	EUR	11	30207687	A	C	rs476669	ARL14EP-DT	0.390111	0.951311	0.008014	0.935604	0.967281	-5.87636	4.31e-09	8.36559	24.906	0.00941	0.558339	12	723937	-+++---+---+
W	EUR	11	30208669	A	G	rs1716025	ARL14EP-DT	0.391992	0.951403	0.008009	0.935707	0.967364	-5.86924	4.5e-09	8.34697	23.5805	0.014623	0.533512	12	723937	-+++---++--+
W	EUR	11	30210834	T	C	rs494779	ARL14EP-DT	0.408341	0.94974	0.007944	0.93417	0.965569	-6.11458	9.97e-10	9.00123	28.9418	0.002318	0.619926	12	723937	-+----+++--+
W	EUR	11	30211068	A	G	rs492828	ARL14EP-DT	0.408345	0.949802	0.007946	0.934227	0.965637	-6.10524	1.06e-09	8.97586	28.7092	0.002518	0.616848	12	723937	-+----+++--+
W	EUR	11	30212847	T	C	rs601681	ARL14EP-DT	0.413578	0.948561	0.008046	0.932792	0.964598	-6.17404	6.86e-10	9.16365	29.0881	0.001206	0.656216	11	695507	-+-?--++---+
W	EUR	11	30212885	A	G	rs601640	ARL14EP-DT	0.408286	0.949636	0.007942	0.934069	0.965463	-6.12797	9.17e-10	9.03768	28.7312	0.002498	0.617141	12	723937	-+----+++--+
W	EUR	11	30213059	T	C	rs600768	ARL14EP-DT	0.409082	0.950252	0.007947	0.934676	0.966086	-6.05187	1.47e-09	8.8316	30.2497	0.001448	0.63636	12	723937	-+----++---+
W	EUR	11	30213156	A	G	rs600333	ARL14EP-DT	0.408802	0.949831	0.007943	0.934263	0.965658	-6.10476	1.06e-09	8.97458	29.4166	0.001955	0.626062	12	723937	-+----++---+
W	EUR	11	30213235	C	T	rs540948	ARL14EP-DT	0.408996	0.945878	0.008031	0.930136	0.961886	-6.49843	8.39e-11	10.0761	21.8053	0.016128	0.541396	11	704060	-+----++---?
W	EUR	11	30213950	A	G	rs586326	ARL14EP-DT	0.406664	0.949918	0.00795	0.934336	0.96576	-6.08872	1.17e-09	8.93108	29.9268	0.001627	0.632436	12	723937	-+----++---+
W	EUR	11	30214997	C	T	rs555621	ARL14EP-DT	0.408322	0.949842	0.007943	0.934273	0.965671	-6.10272	1.07e-09	8.96902	29.0042	0.002267	0.620744	12	723937	-+----+++--+
W	EUR	11	30215971	T	C	rs664147	ARL14EP-DT	0.406734	0.950111	0.00795	0.934529	0.965954	-6.06564	1.35e-09	8.86868	30.5425	0.001302	0.639846	12	723937	-+----++---+
W	EUR	11	30217285	A	T	rs621448	ARL14EP-DT	0.408453	0.950018	0.007948	0.934439	0.965855	-6.07845	1.25e-09	8.90329	29.4078	0.001962	0.625949	12	723937	-+----+++--+
W	EUR	11	30217736	G	A	rs553406	ARL14EP-DT	0.432306	0.951842	0.007899	0.936361	0.967579	-5.89933	3.75e-09	8.42583	29.7286	0.001748	0.629985	12	723937	-+----+++--+
W	EUR	11	30217806	T	C	rs553190	ARL14EP-DT	0.43222	0.95197	0.0079	0.936486	0.96771	-5.88292	4.14e-09	8.38277	29.8051	0.0017	0.630935	12	723937	-+----+++--+
W	EUR	11	30217923	A	G	rs618611	ARL14EP-DT	0.430664	0.951987	0.007903	0.936496	0.967734	-5.87843	4.26e-09	8.37102	31.0494	0.001082	0.645725	12	723937	-+----+++--+
W	EUR	11	30218631	A	C	rs11031010	ARL14EP-DT	0.144631	0.889575	0.010644	0.868714	0.910938	-9.66441	4.56e-22	21.3414	20.9951	0.033422	0.476068	12	723937	-------+---+
W	EUR	11	30218670	T	C	rs523875	ARL14EP-DT	0.432204	0.952024	0.007899	0.936541	0.967762	-5.87713	4.29e-09	8.36761	29.9593	0.001608	0.632836	12	723937	-+----+++--+
W	EUR	11	30219282	T	C	rs518357	ARL14EP-DT	0.433085	0.951912	0.007897	0.936433	0.967646	-5.89188	3.92e-09	8.40628	33.1394	0.000499	0.668069	12	723937	-+----+++--+
W	EUR	11	30219485	A	G	rs590833	ARL14EP-DT	0.434696	0.951762	0.007892	0.936294	0.967487	-5.9137	3.44e-09	8.46364	31.7398	0.00084	0.653432	12	723937	-+----+++--+
W	EUR	11	30220184	T	C	rs489096	ARL14EP-DT	0.434591	0.951786	0.007891	0.93632	0.967507	-5.91187	3.48e-09	8.45881	31.8384	0.00081	0.654505	12	723937	-+----+++--+
W	EUR	11	30220740	C	T	rs74485684	ARL14EP-DT	0.159079	0.878597	0.009914	0.859167	0.898468	-11.3433	8.67e-30	29.0619	28.5615	0.002654	0.614866	12	723937	-------+---+
W	EUR	11	30220778	T	C	rs572883	ARL14EP-DT	0.434681	0.951699	0.00789	0.936236	0.967418	-5.9232	3.25e-09	8.48867	31.9496	0.000777	0.655707	12	723937	-+----+++--+
W	EUR	11	30221700	G	T	rs543401	ARL14EP-DT	0.442065	0.950291	0.00799	0.934632	0.966213	-6.01425	1.86e-09	8.7306	30.8104	0.000631	0.675434	11	695507	-+-?--+++--+
W	EUR	11	30222321	T	G	rs1782507	ARL14EP-DT	0.655062	0.95257	0.008358	0.936188	0.969238	-5.49041	4.1e-08	7.3867	19.8094	0.031108	0.495189	11	695507	-++?--------
W	EUR	11	30226339	T	C	rs939433	ARL14EP-DT	0.433114	0.951742	0.007893	0.936273	0.967468	-5.91567	3.4e-09	8.46882	32.8109	0.000565	0.664746	12	723937	-+----+++--+
W	EUR	11	30226845	A	G	rs1630084	ARL14EP-DT	0.434594	0.951843	0.00789	0.936378	0.967564	-5.9053	3.62e-09	8.44154	31.6485	0.000868	0.652432	12	723937	-+----+++--+
W	EUR	11	30227279	T	C	rs1782509	ARL14EP-DT	0.434414	0.951409	0.007888	0.935949	0.967125	-5.9591	2.61e-09	8.58364	31.2805	0.000994	0.648343	12	723937	-+----+++--+
W	EUR	11	30227537	T	C	rs1716024	ARL14EP-DT	0.435306	0.952066	0.007891	0.9366	0.967787	-5.87851	4.25e-09	8.37121	32.0196	0.000757	0.656461	12	723937	-+-+--+++--+
W	EUR	11	30227975	C	T	rs1716023	ARL14EP-DT	0.434903	0.951766	0.007889	0.936303	0.967484	-5.91554	3.4e-09	8.46849	31.9602	0.000774	0.655822	12	723937	-+-+--+++--+
W	EUR	11	30228003	C	A	rs1782510	ARL14EP-DT	0.434729	0.951799	0.007889	0.936336	0.967517	-5.91145	3.49e-09	8.45771	31.6488	0.000868	0.652435	12	723937	-+-+--+++--+
W	EUR	11	30228630	T	C	rs1716022	ARL14EP-DT	0.435051	0.951183	0.007881	0.935737	0.966884	-5.99172	2.14e-09	8.6704	31.0646	0.001076	0.6459	12	723937	-+----+++--+
W	EUR	11	30228812	C	T	rs537263	ARL14EP-DT	0.434631	0.951786	0.007889	0.936324	0.967503	-5.91333	3.45e-09	8.46267	31.8543	0.000805	0.654678	12	723937	-+----+++--+
W	EUR	11	30228932	A	G	rs538236	ARL14EP-DT	0.434615	0.952038	0.007892	0.93657	0.967761	-5.88122	4.18e-09	8.37831	31.8668	0.000801	0.654813	12	723937	-+-+--+++--+
W	EUR	11	30229021	C	T	rs654669	ARL14EP-DT	0.433178	0.952063	0.007896	0.936587	0.967795	-5.87492	4.35e-09	8.36183	33.1255	0.000502	0.66793	12	723937	-+-+--+++--+
W	EUR	11	30229804	C	A	rs640748	ARL14EP-DT	0.434737	0.951898	0.00789	0.936433	0.967618	-5.89893	3.76e-09	8.4248	32.3517	0.00067	0.659987	12	723937	-+-+--+++--+
W	EUR	11	30230078	T	C	rs639403	ARL14EP-DT	0.434653	0.951567	0.007887	0.936108	0.967281	-5.94064	2.92e-09	8.53475	31.8926	0.000794	0.655092	12	723937	-+----+++--+
W	EUR	11	30230805	T	G	rs10835638	ARL14EP-DT	0.151241	0.889843	0.010797	0.868682	0.91152	-9.50419	2.15e-21	20.6681	12.4909	0.18703	0.279473	10	675630	---?---+---?
W	EUR	11	30231642	G	T	rs550312	FSHB	0.433172	0.951913	0.007894	0.936441	0.96764	-5.89444	3.86e-09	8.41299	33.5527	0.000428	0.672158	12	723937	-+-+--+++--+
W	EUR	11	30231771	T	A	rs611246	FSHB	0.433226	0.951735	0.007893	0.936265	0.967461	-5.91639	3.38e-09	8.47072	33.3943	0.000454	0.670602	12	723937	-+----+++--+
W	EUR	11	30232094	C	T	rs609896	FSHB	0.434691	0.951591	0.007886	0.936135	0.967303	-5.93881	2.95e-09	8.5299	31.9461	0.000778	0.65567	12	723937	-+----+++--+
W	EUR	11	30232721	G	T	rs580646	FSHB	0.433164	0.951837	0.007893	0.936366	0.967564	-5.9039	3.65e-09	8.43784	33.2599	0.000477	0.669272	12	723937	-+-+--+++--+
W	EUR	11	30233003	C	T	rs595496	FSHB	0.433173	0.951736	0.007893	0.936267	0.967461	-5.91651	3.38e-09	8.47104	33.0738	0.000512	0.66741	12	723937	-+-+--+++--+
W	EUR	11	30233136	C	A	rs594982	FSHB	0.435352	0.952071	0.007891	0.936605	0.967792	-5.87794	4.27e-09	8.36973	32.2706	0.00069	0.659132	12	723937	-+-+--+++--+
W	EUR	11	30233638	T	C	rs6169	FSHB	0.443081	0.94733	0.008091	0.931471	0.963459	-6.28178	3.45e-10	9.46176	25.8991	0.002122	0.652497	10	675630	-+-?--+++--?
W	EUR	11	30234276	G	A	rs506197	FSHB	0.434737	0.951555	0.007887	0.936096	0.96727	-5.94212	2.89e-09	8.53867	31.6358	0.000872	0.652293	12	723937	-+----+++--+
W	EUR	11	30234320	G	C	rs506306	FSHB	0.434693	0.951575	0.007888	0.936115	0.96729	-5.9395	2.94e-09	8.53172	31.7114	0.000848	0.653122	12	723937	-+----+++--+
W	EUR	11	30234435	G	A	rs676349	FSHB	0.434637	0.951732	0.007889	0.936269	0.96745	-5.91972	3.32e-09	8.4795	31.5281	0.000908	0.651104	12	723937	-+----+++--+
W	EUR	11	30235575	G	A	rs560078	ARL14EP-DT	0.434892	0.951798	0.007889	0.936335	0.967517	-5.91145	3.49e-09	8.45772	31.7879	0.000825	0.653956	12	723937	-+----+++--+
W	EUR	11	30237223	T	C	rs626869	ARL14EP-DT	0.434827	0.951837	0.00789	0.936372	0.967557	-5.90617	3.6e-09	8.44383	31.4602	0.000931	0.650351	12	723937	-+-+--+++--+
W	EUR	11	30237442	A	G	rs615577	ARL14EP-DT	0.434747	0.951841	0.00789	0.936376	0.967561	-5.90572	3.61e-09	8.44263	31.539	0.000904	0.651225	12	723937	-+-+--+++--+
W	EUR	11	30239668	T	C	rs7126848	ARL14EP-DT	0.434846	0.951883	0.00789	0.936418	0.967604	-5.90056	3.72e-09	8.42908	31.6269	0.000875	0.652195	12	723937	-+----+++--+
W	EUR	11	30240363	C	A	rs622356	ARL14EP-DT	0.434824	0.951988	0.007891	0.936522	0.96771	-5.88766	4.03e-09	8.39519	31.894	0.000793	0.655107	12	723937	-+-+--+++--+
W	EUR	11	30240421	G	A	rs7951733	ARL14EP-DT	0.074289	0.885533	0.014085	0.857926	0.914028	-7.52304	5.59e-14	13.2525	13.1125	0.217448	0.237371	11	695507	---?---+----
W	EUR	11	30242108	T	C	rs532667	ARL14EP-DT	0.434911	0.952099	0.007892	0.936631	0.967823	-5.87345	4.39e-09	8.35798	31.9996	0.000763	0.656246	12	723937	-+-+--+++--+
W	EUR	11	30242821	A	G	rs560109	ARL14EP-DT	0.434932	0.95171	0.00789	0.936246	0.967429	-5.92172	3.28e-09	8.48477	31.377	0.000959	0.649425	12	723937	-+----+++--+
W	EUR	11	30246997	C	G	rs1716029	ARL14EP-DT	0.433546	0.951123	0.008209	0.935034	0.96749	-5.75683	8.8e-09	8.05571	31.5634	0.000237	0.71486	10	645497	-+--?-+++?-+
W	EUR	11	30249612	G	A	rs549346	ARL14EP-DT	0.43331	0.952095	0.007896	0.936619	0.967826	-5.87119	4.45e-09	8.35206	32.8966	0.000547	0.665619	12	723937	-+-+--+++--+
W	EUR	11	30255481	T	C	rs4120820	ARL14EP-DT	0.433253	0.952207	0.007898	0.936728	0.967942	-5.85643	4.86e-09	8.3135	32.4719	0.00064	0.661246	12	723937	-+----+++--+
W	EUR	11	30258062	C	T	rs1933347	ARL14EP-DT	0.338161	1.04994	0.009241	1.03183	1.06837	5.48986	4.12e-08	7.38535	19.9813	0.02943	0.499532	11	704060	+--++++++++?
W	EUR	11	30259783	A	G	rs6484477	ARL14EP-DT	0.433158	0.95252	0.007901	0.937034	0.968262	-5.81647	6.17e-09	8.20958	32.619	0.000606	0.662774	12	723937	-+-+--+++--+
W	EUR	11	30266708	A	T	rs11031021	ARL14EP-DT	0.435575	0.950941	0.008208	0.934854	0.967306	-5.77854	7.74e-09	8.11154	31.5203	0.000241	0.71447	10	645497	-+++?-+++?-+
W	EUR	11	30266709	A	C	rs10835641	ARL14EP-DT	0.435581	0.950928	0.008208	0.934841	0.967292	-5.78017	7.66e-09	8.11573	31.5107	0.000242	0.714383	10	645497	-+++?-+++?-+
W	EUR	11	30267151	G	T	rs7944484	ARL14EP-DT	0.434009	0.951119	0.00821	0.935027	0.967488	-5.75648	8.81e-09	8.05479	32.5091	0.000163	0.723155	10	645497	-+-+?-+++?-+
W	EUR	11	30274508	C	T	rs12364889	ARL14EP-DT	0.144662	0.890605	0.010645	0.86974	0.91197	-9.57857	1.05e-21	20.9793	20.9227	0.034181	0.474255	12	723937	-------+---+
W	EUR	11	30275827	C	T	rs11031027	ARL14EP-DT	0.338605	1.04887	0.009087	1.03106	1.06699	5.46096	4.85e-08	7.31459	20.6178	0.037555	0.466479	12	723937	+--++++++++-
W	EUR	11	30276262	C	T	rs7108615	ARL14EP-DT	0.340121	1.04891	0.009081	1.03111	1.06701	5.46837	4.65e-08	7.3327	21.4765	0.028757	0.487813	12	723937	+--++++-+++-
W	EUR	11	30279145	T	C	rs4120821	ARL14EP-DT	0.432998	0.951292	0.00789	0.935828	0.967012	-5.9715	2.42e-09	8.61659	32.1354	0.000725	0.657699	12	723937	-+----+++--+
W	EUR	11	30280321	C	T	rs4923631	ARL14EP-DT	0.338697	1.04884	0.009086	1.03103	1.06696	5.45706	4.95e-08	7.30508	20.375	0.040455	0.460123	12	723937	+--++++++++-
W	EUR	11	30281896	G	A	rs4359180	ARL14EP-DT	0.338623	1.04922	0.009085	1.03142	1.06734	5.5019	3.85e-08	7.41493	20.0528	0.044621	0.451449	12	723937	+--++++++++-
W	EUR	11	30282908	C	T	rs11031030	ARL14EP-DT	0.338694	1.04908	0.009089	1.03127	1.0672	5.48325	4.27e-08	7.36916	20.1404	0.043452	0.453835	12	723937	+--++++++++-
W	EUR	11	30283179	C	G	rs11031032	ARL14EP-DT	0.340222	1.04882	0.009079	1.03102	1.06692	5.4589	4.9e-08	7.30957	21.5811	0.027827	0.490295	12	723937	+--++++-+++-
W	EUR	11	30284128	T	C	rs11031033	ARL14EP-DT	0.144667	0.889925	0.010639	0.869073	0.911279	-9.63985	5.79e-22	21.2375	20.6702	0.036953	0.467834	12	723937	-------+---+
W	EUR	11	30284892	T	C	rs11031034	ARL14EP-DT	0.144787	0.890298	0.010641	0.869442	0.911654	-9.60772	7.91e-22	21.1019	20.8122	0.03537	0.471463	12	723937	-------+---+
W	EUR	11	30285103	T	A	rs11031035	ARL14EP-DT	0.144787	0.890021	0.010635	0.869176	0.911366	-9.63578	6.02e-22	21.2203	20.7087	0.036518	0.468823	12	723937	-------+---+
W	EUR	11	30286442	G	A	rs75525300	ARL14EP-DT	0.159155	0.878939	0.009915	0.859505	0.898812	-11.312	1.24e-29	28.907	28.9182	0.002337	0.619617	12	723937	-------+---+
W	EUR	11	30286612	T	C	rs4120817	ARL14EP-DT	0.144807	0.886066	0.010769	0.864959	0.907689	-9.83378	8.6e-23	22.0653	16.4715	0.086907	0.392892	11	704060	-------+---?
W	EUR	11	30288185	C	T	rs10767833	ARL14EP-DT	0.432853	0.951641	0.007893	0.936171	0.967366	-5.92776	3.16e-09	8.50071	31.1407	0.001046	0.646764	12	723937	-+----+++--+
W	EUR	11	30288280	T	C	rs10835644	ARL14EP-DT	0.144746	0.889959	0.010635	0.869115	0.911303	-9.64132	5.71e-22	21.2437	20.5174	0.03873	0.463869	12	723937	-------+---+
W	EUR	11	30288322	T	C	rs10835645	ARL14EP-DT	0.144771	0.889999	0.010635	0.869155	0.911343	-9.63791	5.9e-22	21.2293	20.7627	0.035914	0.470204	12	723937	-------+---+
W	EUR	11	30288358	T	C	rs10835646	ARL14EP-DT	0.144869	0.89019	0.010635	0.869345	0.911534	-9.62208	6.88e-22	21.1624	21.2166	0.031195	0.481539	12	723937	-------+---+
W	EUR	11	30289769	G	A	rs10742238	ARL14EP-DT	0.432889	0.951995	0.007895	0.93652	0.967726	-5.88341	4.13e-09	8.38406	31.9304	0.000783	0.655501	12	723937	-+-+--+++--+
W	EUR	11	30290640	G	A	rs12281078	ARL14EP-DT	0.144809	0.889983	0.010636	0.869138	0.911329	-9.63849	5.86e-22	21.2317	20.8551	0.034904	0.47255	12	723937	-------+---+
W	EUR	11	30290692	T	C	rs12294258	ARL14EP-DT	0.14481	0.890134	0.010636	0.869286	0.911481	-9.62539	6.66e-22	21.1764	20.9861	0.033516	0.475843	12	723937	-------+---+
W	EUR	11	30292706	C	T	rs11031038	ARL14EP-DT	0.432974	0.951623	0.007892	0.936155	0.967347	-5.93052	3.1e-09	8.508	31.6784	0.000859	0.65276	12	723937	-+----+++--+
W	EUR	11	30293311	A	C	rs11031039	ARL14EP-DT	0.14484	0.890113	0.010635	0.869268	0.911459	-9.62803	6.49e-22	21.1876	20.9689	0.033694	0.475414	12	723937	-------+---+
W	EUR	11	30295275	G	A	rs12278989	ARL14EP-DT	0.159185	0.878705	0.009911	0.85928	0.89857	-11.3372	9.29e-30	29.0319	28.6261	0.002594	0.615735	12	723937	-------+---+
W	EUR	11	30296186	G	T	rs11031040	ARL14EP-DT	0.1591	0.878871	0.009915	0.859438	0.898742	-11.3186	1.15e-29	28.9395	28.95	0.002311	0.620035	12	723937	-------+---+
W	EUR	11	30297712	A	G	rs12271187	ARL14EP-DT	0.1591	0.878838	0.009914	0.859407	0.898708	-11.3224	1.1e-29	28.9585	28.9224	0.002334	0.619672	12	723937	-------+---+
W	EUR	11	30297886	A	G	rs12271300	ARL14EP-DT	0.15909	0.878785	0.009914	0.859354	0.898656	-11.3266	1.05e-29	28.9793	28.9611	0.002302	0.62018	12	723937	-------+---+
W	EUR	11	30301642	T	C	rs1933349	ARL14EP-DT	0.433027	0.951386	0.007889	0.935924	0.967103	-5.96128	2.57e-09	8.58944	31.5539	0.000899	0.65139	12	723937	-+-+--+++--+
W	EUR	11	30302928	A	T	rs1933348	ARL14EP-DT	0.433082	0.951925	0.007892	0.936457	0.967648	-5.8947	3.86e-09	8.41367	32.4276	0.000651	0.660783	12	723937	-+-+--+++--+
W	EUR	11	30304318	A	G	rs7123626	ARL14EP-DT	0.144808	0.890643	0.010642	0.869784	0.912002	-9.57822	1.05e-21	20.9778	20.9109	0.034306	0.473958	12	723937	-------+---+
W	EUR	11	30305459	A	G	rs12361594	ARL14EP-DT	0.144906	0.889878	0.010627	0.86905	0.911206	-9.65516	4.99e-22	21.3022	20.7936	0.035574	0.470991	12	723937	-------+---+
W	EUR	11	30307628	G	A	rs10835649	ARL14EP-DT	0.159154	0.878478	0.009907	0.85906	0.898336	-11.3609	7.09e-30	29.1495	28.7562	0.002476	0.617473	12	723937	-------+---+
W	EUR	11	30314455	A	G	rs4071563	ARL14EP-DT	0.159175	0.87882	0.009909	0.859398	0.898681	-11.3291	1.02e-29	28.9914	28.6561	0.002566	0.616138	12	723937	-------+---+
W	EUR	11	30315976	T	C	rs11031047	ARL14EP-DT	0.159197	0.878429	0.009906	0.859013	0.898283	-11.367	6.61e-30	29.1797	28.6414	0.002579	0.615941	12	723937	-------+---+
W	EUR	11	30316728	A	T	rs10767835	ARL14EP-DT	0.43303	0.951897	0.007891	0.93643	0.967618	-5.89855	3.77e-09	8.42377	32.5422	0.000624	0.661977	12	723937	-+-+--+++--+
W	EUR	11	30316845	C	T	rs10767836	ARL14EP-DT	0.433004	0.951905	0.007892	0.936435	0.967629	-5.89647	3.82e-09	8.41831	32.4935	0.000635	0.661471	12	723937	-+-+--+++--+
W	EUR	11	30317295	G	A	rs7947350	ARL14EP-DT	0.159152	0.878666	0.009909	0.859245	0.898526	-11.343	8.69e-30	29.0608	28.5542	0.002661	0.614767	12	723937	-------+---+
W	EUR	11	30317914	G	A	rs7929660	ARL14EP-DT	0.159212	0.878504	0.009906	0.859089	0.898357	-11.3608	7.1e-30	29.1489	27.8372	0.003428	0.604845	12	723937	-------+---+
W	EUR	11	30319663	G	A	rs10767837	ARL14EP-DT	0.434443	0.951813	0.007889	0.93635	0.96753	-5.9101	3.51e-09	8.45417	31.2226	0.001015	0.647692	12	723937	-+-+--+++--+
W	EUR	11	30320603	A	G	rs12363824	ARL14EP-DT	0.159031	0.878693	0.009913	0.859263	0.898562	-11.3356	9.47e-30	29.0238	28.2208	0.002994	0.610217	12	723937	-------+---+
W	EUR	11	30320626	T	A	rs3897026	ARL14EP-DT	0.441739	0.95011	0.007989	0.934452	0.966031	-6.03619	1.62e-09	8.78942	29.7399	0.000945	0.663751	11	695507	-+-?--+++--+
W	EUR	11	30320948	A	G	rs6484479	ARL14EP-DT	0.159175	0.878635	0.009909	0.859213	0.898495	-11.3455	8.45e-30	29.073	28.5896	0.002627	0.615245	12	723937	-------+---+
W	EUR	11	30322210	T	C	rs3858429	ARL14EP-DT	0.15914	0.878611	0.009909	0.859189	0.898473	-11.3472	8.3e-30	29.0812	28.5517	0.002663	0.614735	12	723937	-------+---+
W	EUR	11	30323044	T	C	rs4071558	ARL14EP-DT	0.159147	0.87871	0.00991	0.859286	0.898573	-11.3375	9.26e-30	29.0334	28.5855	0.002631	0.615189	12	723937	-------+---+
W	EUR	11	30323178	T	C	rs4071559	ARL14EP	0.159089	0.878463	0.009911	0.859038	0.898326	-11.3586	7.28e-30	29.1379	28.0976	0.003128	0.608508	12	723937	-------+---+
W	EUR	11	30327091	C	G	rs4427542	ARL14EP	0.432686	0.951327	0.007889	0.935863	0.967045	-5.96785	2.47e-09	8.60688	32.4384	0.000648	0.660896	12	723937	-+----++---+
W	EUR	11	30328645	T	C	rs2065940	ARL14EP	0.432719	0.947711	0.007985	0.93206	0.963625	-6.3211	2.68e-10	9.57177	26.2275	0.003446	0.61872	11	704060	-+----++---?
W	EUR	11	30332334	G	A	rs77055031	ARL14EP	0.072317	0.884933	0.014021	0.857453	0.913294	-7.59516	3.21e-14	13.4929	13.2735	0.275826	0.171281	12	723937	-------+----
W	EUR	11	30333310	C	T	rs12278547	ARL14EP	0.14528	0.890792	0.010628	0.869961	0.912122	-9.57885	1.05e-21	20.9805	21.326	0.030146	0.484199	12	723937	-------+---+
W	EUR	11	30333348	G	A	rs7118949	ARL14EP	0.144812	0.891379	0.010643	0.870518	0.91274	-9.51685	1.9e-21	20.7209	21.8747	0.025362	0.497136	12	723937	-------+---+
W	EUR	11	30333357	C	A	rs7121963	ARL14EP	0.144898	0.891211	0.010641	0.870354	0.912567	-9.53268	1.63e-21	20.787	21.5924	0.027728	0.490561	12	723937	-------+---+
W	EUR	11	30333650	T	C	rs7122449	ARL14EP	0.144918	0.891276	0.010642	0.870418	0.912633	-9.52701	1.72e-21	20.7633	21.6208	0.027481	0.491231	12	723937	-------+---+
W	EUR	11	30334310	T	C	rs11512201	ARL14EP	0.145014	0.891158	0.010636	0.87031	0.912504	-9.54147	1.5e-21	20.8238	21.878	0.025336	0.497211	12	723937	-------+---+
W	EUR	11	30334356	T	C	rs10835655	ARL14EP	0.145027	0.891506	0.010639	0.870652	0.912858	-9.51007	2.03e-21	20.6926	21.6287	0.027412	0.491418	12	723937	-------+---+
W	EUR	11	30334545	A	G	rs10767839	ARL14EP	0.432775	0.951651	0.007894	0.93618	0.967378	-5.9259	3.19e-09	8.49581	32.6196	0.000606	0.662779	12	723937	-+-+--+++--+
W	EUR	11	30334873	C	T	rs12272134	ARL14EP	0.145041	0.891564	0.010641	0.870708	0.912919	-9.50422	2.15e-21	20.6682	21.8591	0.025487	0.496778	12	723937	-------+---+
W	EUR	11	30337684	G	A	rs7116893	ARL14EP	0.144952	0.891241	0.01064	0.870387	0.912594	-9.53145	1.65e-21	20.7819	21.4877	0.028656	0.488079	12	723937	-------+---+
W	EUR	11	30338345	G	A	rs7117691	ARL14EP/LOC102723403	0.145102	0.891171	0.010634	0.870328	0.912514	-9.54208	1.49e-21	20.8263	21.8576	0.0255	0.496743	12	723937	-------+---+
W	EUR	11	30338479	C	T	rs12278112	ARL14EP/LOC102723403	0.145033	0.891426	0.010639	0.870575	0.912777	-9.51729	1.89e-21	20.7227	21.9544	0.024729	0.498962	12	723937	-------+---+
W	EUR	11	30338678	A	G	rs141402489	ARL14EP/LOC102723403	0.145194	0.891517	0.010639	0.870664	0.91287	-9.50911	2.05e-21	20.6886	21.856	0.025513	0.496707	12	723937	-------+---+
W	EUR	11	30339247	T	C	rs11031052	ARL14EP/LOC102723403	0.145047	0.891572	0.010639	0.870718	0.912924	-9.50472	2.14e-21	20.6703	21.7403	0.026464	0.494028	12	723937	-------+---+
W	EUR	11	30341554	A	G	rs7926666	ARL14EP/LOC102723403	0.146737	0.91977	0.013859	0.892606	0.947761	-5.46783	4.66e-08	7.33139	10.3454	0.410729	0.0333891	11	595766	?------+---+
W	EUR	11	30341998	C	T	rs12285277	ARL14EP/LOC102723403	0.144982	0.890953	0.010635	0.870108	0.912296	-9.55962	1.26e-21	20.8998	21.2986	0.030406	0.483535	12	723937	-------+---+
W	EUR	11	30344981	A	T	rs11031056	ARL14EP/LOC102723403	0.144995	0.891053	0.010634	0.870211	0.912395	-9.55224	1.35e-21	20.8689	21.7357	0.026503	0.49392	12	723937	-------+---+
W	EUR	11	30345785	C	T	rs1538109	ARL14EP/LOC102723403	0.434054	0.951718	0.007892	0.93625	0.967441	-5.91931	3.32e-09	8.47842	32.5728	0.000617	0.662295	12	723937	-+-+--+++--+
W	EUR	11	30347873	T	C	rs6484481	ARL14EP/LOC102723403	0.434322	0.951838	0.007894	0.936366	0.967565	-5.90348	3.66e-09	8.43675	32.8504	0.000556	0.665148	12	723937	-+-+--+++--+
W	EUR	11	30348671	G	A	rs12365913	ARL14EP/LOC102723403	0.145012	0.891111	0.010635	0.870266	0.912455	-9.54624	1.43e-21	20.8437	21.7629	0.026276	0.494553	12	723937	-------+---+
W	EUR	11	30349766	T	C	rs10835658	ARL14EP/LOC102723403	0.14507	0.890993	0.010631	0.870155	0.912329	-9.55943	1.26e-21	20.899	22.0898	0.023687	0.502033	12	723937	-------+---+
W	EUR	11	30350068	T	C	rs12363432	ARL14EP/LOC102723403	0.145051	0.890827	0.01063	0.869991	0.912162	-9.57389	1.1e-21	20.9596	21.7664	0.026246	0.494635	12	723937	-------+---+
W	EUR	11	30351271	T	C	rs74331022	ARL14EP/LOC102723403	0.144704	0.887634	0.010776	0.866512	0.909271	-9.70069	3.2e-22	21.4954	17.9378	0.056022	0.442517	11	704060	-------+---?
W	EUR	11	30353061	G	A	rs7949790	ARL14EP/LOC102723403	0.159924	0.893612	0.010287	0.87345	0.91424	-9.66082	4.72e-22	21.3262	15.9857	0.141662	0.311886	12	723937	-------+----
W	EUR	11	30354342	T	C	rs11031058	ARL14EP/LOC102723403	0.159919	0.893535	0.010298	0.873351	0.914187	-9.65631	4.93e-22	21.3071	16.0288	0.140065	0.313736	12	723937	-------+----
W	EUR	11	30354662	T	C	rs7929105	ARL14EP/LOC102723403	0.449365	0.950214	0.007856	0.934817	0.965865	-6.12694	9.23e-10	9.03488	27.8983	0.003355	0.605711	12	723937	-+-----++--+
W	EUR	11	30354767	A	T	rs76959488	ARL14EP/LOC102723403	0.160013	0.893559	0.010285	0.873399	0.914183	-9.66676	4.45e-22	21.3514	16.0307	0.139996	0.313816	12	723937	-------+----
W	EUR	11	30355355	C	A	rs10835660	LOC102723403	0.159916	0.893705	0.010289	0.873539	0.914336	-9.65104	5.19e-22	21.2848	16.1655	0.135097	0.319539	12	723937	-------+----
W	EUR	11	30357147	G	T	rs7952660	LOC102723403	0.450349	0.949867	0.007854	0.934473	0.965514	-6.16999	7.04e-10	9.15256	27.4066	0.003988	0.598637	12	723937	-+-----++--+
W	EUR	11	30359529	C	T	rs10835661	LOC102723403	0.166977	0.901015	0.010007	0.881402	0.921065	-9.28266	1.76e-20	19.7552	11.8862	0.372256	0.0745593	12	723937	-------+---+
W	EUR	11	30361352	T	C	rs12294104	LOC102723403	0.165035	0.898394	0.010212	0.878379	0.918865	-9.32083	1.23e-20	19.911	11.7498	0.302153	0.148919	11	704060	-------+---?
W	EUR	11	30373402	C	T	rs571174	RPL12P30/MPPED2	0.305871	1.05098	0.00935	1.03265	1.06963	5.5402	3.09e-08	7.50947	23.7387	0.013881	0.536621	12	723937	+-+-++-++++-
W	EUR	11	30373901	T	G	rs80268871	RPL12P30/MPPED2	0.097794	0.888572	0.012581	0.863912	0.913935	-8.22746	2.01e-16	15.6964	23.4509	0.015258	0.530934	12	723937	-+-----+---+
W	EUR	11	30374324	T	C	rs12223987	RPL12P30/MPPED2	0.16649	0.899068	0.010032	0.879406	0.91917	-9.43091	4.33e-21	20.3638	13.7027	0.24988	0.197241	12	723937	-------+---+
W	EUR	11	30374348	G	T	rs490937	RPL12P30/MPPED2	0.306949	1.05051	0.009345	1.03219	1.06915	5.49099	4.09e-08	7.38813	22.9768	0.017809	0.521256	12	723937	+-++++-++++-
W	EUR	12	94942561	G	A	rs11831109	LOC105369915/NDUFA12	0.040697	1.12401	0.023175	1.07858	1.17134	5.55444	2.85e-08	7.54476	22.1521	0.023221	0.503434	12	723937	++++-+-+-+++
W	EUR	12	94946683	A	G	rs58752391	LOC105369915/NDUFA12	0.265603	0.950486	0.00876	0.933316	0.967972	-5.45994	4.87e-08	7.3121	11.8357	0.296206	0.155095	11	714850	--?----++---
W	EUR	12	94953866	T	C	rs10859800	LOC105369915/NDUFA12	0.26802	0.947933	0.008706	0.930869	0.96531	-5.76928	8.17e-09	8.08768	13.2213	0.211558	0.243647	11	714850	--?----++---
W	EUR	12	94967223	T	A	rs7308376	LOC105369915/NDUFA12	0.677851	0.948149	0.008554	0.931382	0.965217	-5.84912	5.08e-09	8.29443	8.74273	0.645626	0	12	723937	--++--------
W	EUR	12	94967275	A	G	rs7308787	LOC105369915/NDUFA12	0.678652	0.94862	0.008567	0.931829	0.965714	-5.78869	7.28e-09	8.13772	8.93924	0.627501	0	12	723937	--++--------
W	EUR	12	94967920	A	C	rs10777661	LOC105369915/NDUFA12	0.32509	0.95309	0.008318	0.936786	0.969677	-5.45797	4.93e-08	7.30729	6.50425	0.837694	0	12	723937	--+-----+---
W	EUR	12	94970233	T	C	rs61935715	LOC105369915/NDUFA12	0.060073	1.11717	0.019579	1.07879	1.15691	6.21263	5.37e-10	9.26987	11.6566	0.389999	0.056331	12	723937	+++--+++++++
W	EUR	12	94972023	C	T	rs11837672	NDUFA12	0.282563	0.951447	0.008588	0.934614	0.968583	-5.46505	4.74e-08	7.32459	7.31768	0.772805	0	12	723937	--++---++---
W	EUR	12	94975639	A	T	rs11836742	NDUFA12	0.059997	1.11759	0.019601	1.07917	1.15737	6.22907	4.84e-10	9.3153	10.9694	0.445827	0	12	723937	+++--+++++++
W	EUR	12	94976669	C	T	rs61935733	NDUFA12	0.05978	1.12021	0.020029	1.08095	1.16089	6.23696	4.6e-10	9.33716	10.5026	0.397554	0.0478588	11	704060	++++-++++++?
W	EUR	12	94979999	A	G	rs61935734	NDUFA12	0.060175	1.11704	0.019572	1.07867	1.15676	6.20748	5.55e-10	9.25564	10.9582	0.446769	0	12	723937	++++-+++++++
W	EUR	12	94981692	G	A	rs11833532	NDUFA12	0.060164	1.11722	0.01957	1.07886	1.15694	6.21872	5.17e-10	9.28669	11.2107	0.425784	0.0187942	12	723937	++++-+++++++
W	EUR	12	94986030	G	A	rs140466332	NDUFA12	0.060183	1.1168	0.01956	1.07846	1.1565	6.19828	5.88e-10	9.23029	11.4207	0.408717	0.0368402	12	723937	+++--+++++++
W	EUR	12	94994408	T	C	rs17023557	NDUFA12	0.060749	1.1212	0.019873	1.08225	1.16156	6.34161	2.35e-10	9.62942	10.4342	0.403259	0.0416138	11	695507	+++?-+++++++
W	EUR	12	94997192	T	C	rs61935750	NDUFA12	0.059812	1.11922	0.019998	1.08002	1.15984	6.19255	6.1e-10	9.21453	11.625	0.310937	0.139786	11	704060	+++--++++++?
W	EUR	12	95000478	C	A	rs11829773	NDUFA12	0.06021	1.11813	0.019572	1.07977	1.15785	6.26893	3.75e-10	9.42596	12.1337	0.353678	0.0934337	12	723937	+++--+++++++
W	EUR	12	95003256	T	C	rs61935751	NDUFA12	0.060355	1.11696	0.019423	1.07889	1.15637	6.25159	4.19e-10	9.37773	13.1843	0.281449	0.165675	12	723937	+++--+++-+++
W	EUR	12	95003868	T	G	rs17023565	NDUFA12/NR2C1	0.060347	1.11595	0.01941	1.0779	1.15534	6.199	5.86e-10	9.23227	13.5405	0.25947	0.187622	12	723937	+++--+++-+++
W	EUR	12	95005679	T	C	rs56307685	NDUFA12/NR2C1	0.060336	1.11649	0.019422	1.07843	1.1559	6.22606	4.93e-10	9.30698	12.9906	0.29394	0.153234	12	723937	++++-+++-+++
W	EUR	12	95010076	C	G	rs17023567	NDUFA12/NR2C1	0.060374	1.11601	0.019405	1.07798	1.15539	6.20435	5.66e-10	9.24702	13.5735	0.2575	0.189595	12	723937	+++--+++-+++
W	EUR	12	95010197	A	T	rs55908464	NDUFA12/NR2C1	0.059293	1.11885	0.020578	1.07852	1.16069	5.99523	2.09e-09	8.67977	11.8754	0.156848	0.326341	9	636410	++?-?+++-?++
W	EUR	12	95010292	A	C	rs56127812	NDUFA12/NR2C1	0.059264	1.11225	0.019846	1.07335	1.15256	5.85742	4.83e-09	8.31608	12.6302	0.31818	0.129072	12	723937	++++-+++-+++
W	EUR	12	95010408	A	G	rs171597	NDUFA12/NR2C1	0.263088	1.05632	0.010058	1.0366	1.07641	5.70014	1.23e-08	7.91084	10.5269	0.483703	0	12	723937	++-+++++++++
W	EUR	12	95021426	C	A	rs113562654	NR2C1	0.304653	0.951143	0.008454	0.934574	0.968006	-5.58664	2.37e-08	7.62489	5.92758	0.878152	0	12	723937	--+----++---
W	EUR	12	95024361	A	T	rs61935755	NR2C1	0.059589	1.11498	0.0196	1.07656	1.15477	6.084	1.21e-09	8.9183	10.0876	0.522526	0	12	723937	+++--+++++++
W	EUR	12	95026223	T	G	rs61935757	NR2C1	0.05959	1.11519	0.019604	1.07677	1.15499	6.09479	1.13e-09	8.94753	9.73236	0.554611	0	12	723937	++++-+++++++
W	EUR	12	95028619	G	T	rs57571944	NR2C1	0.05962	1.11529	0.01959	1.07689	1.15505	6.10436	1.06e-09	8.97347	9.86266	0.542781	0	12	723937	++++-+++++++
W	EUR	12	95035262	A	G	rs58769104	NR2C1	0.059717	1.11446	0.01957	1.0761	1.15418	6.0645	1.36e-09	8.86561	9.83581	0.545214	0	12	723937	++++-+++++++
W	EUR	12	95036891	G	A	rs61935759	NR2C1	0.059712	1.11491	0.019579	1.07654	1.15465	6.08688	1.19e-09	8.92609	9.5806	0.56846	0	12	723937	++++-+++++++
W	EUR	12	95039265	C	A	rs17023583	NR2C1	0.059753	1.11413	0.019563	1.07578	1.15384	6.04834	1.51e-09	8.82209	9.93078	0.536624	0	12	723937	+++--+++++++
W	EUR	12	95044504	G	C	rs112976005	NR2C1	0.300007	0.951881	0.008469	0.935283	0.968774	-5.4947	4.01e-08	7.39724	7.12986	0.788472	0	12	723937	--++---++---
W	EUR	12	95046249	G	A	rs17023608	NR2C1	0.059631	1.11661	0.019616	1.07816	1.15643	6.16976	7.05e-10	9.15193	9.44675	0.580727	0	12	723937	++++-+++++++
W	EUR	12	95049713	G	A	rs7971079	NR2C1	0.300087	0.952206	0.008472	0.935601	0.969105	-5.45634	4.97e-08	7.30332	7.26889	0.776909	0	12	723937	--++---++---
W	EUR	12	95052475	C	G	rs61938161	NR2C1	0.059622	1.11525	0.01964	1.07675	1.15512	6.08618	1.19e-09	8.9242	8.91557	0.629685	0	12	723937	++++-+++++++
W	EUR	12	95052985	C	T	rs11107877	NR2C1	0.300291	0.951566	0.008468	0.934968	0.968458	-5.52984	3.28e-08	7.48384	7.05518	0.794597	0	12	723937	--+----++---
W	EUR	12	95058773	T	C	rs876116	NR2C1	0.059622	1.11607	0.019653	1.07755	1.15597	6.12814	9.16e-10	9.03815	9.03604	0.618565	0	12	723937	++++-+++++++
W	EUR	12	95061385	C	G	rs61938164	NR2C1	0.059628	1.11685	0.019665	1.0783	1.15677	6.16736	7.16e-10	9.14533	9.02151	0.619906	0	12	723937	++++-+++++++
W	EUR	12	95063955	A	G	rs11107881	NR2C1	0.300244	0.952053	0.008472	0.935448	0.968953	-5.47338	4.52e-08	7.34496	7.09004	0.791746	0	12	723937	--+----++---
W	EUR	12	95068917	T	C	rs56293535	NR2C1	0.059957	1.11539	0.01961	1.07696	1.1552	6.10398	1.07e-09	8.97244	9.17444	0.605794	0	12	723937	++++-+++++++
W	EUR	12	95070927	T	C	rs60745517	NR2C1	0.059602	1.116	0.019654	1.07747	1.1559	6.12338	9.44e-10	9.02517	9.16671	0.606508	0	12	723937	++++-+++++++
W	EUR	12	95076368	C	A	rs11107883	NR2C1/FGD6	0.301942	0.951931	0.008469	0.935332	0.968824	-5.48908	4.14e-08	7.38345	6.57017	0.832748	0	12	723937	--+----++---
W	EUR	12	95078313	A	G	rs12316136	FGD6	0.268898	1.05521	0.010129	1.03536	1.07544	5.54577	3e-08	7.52324	10.5985	0.389639	0.0564729	11	695507	++-?++-+++++
W	EUR	12	95083404	G	A	rs11834548	FGD6	0.300328	0.952058	0.008469	0.935459	0.968952	-5.47466	4.49e-08	7.3481	6.56367	0.833239	0	12	723937	--+----++---
W	EUR	12	95083498	G	A	rs2043367	FGD6	0.300557	0.951641	0.008463	0.935053	0.968523	-5.52483	3.38e-08	7.47145	6.41179	0.844525	0	12	723937	--+----++---
W	EUR	12	95083875	G	A	rs1865151	FGD6	0.062397	1.11766	0.019587	1.07927	1.15742	6.23763	4.58e-10	9.33899	9.97842	0.442388	0	11	695507	+++?-+++++++
W	EUR	12	95090304	G	A	rs2367082	FGD6	0.301211	0.951733	0.008462	0.935147	0.968613	-5.51535	3.56e-08	7.44806	6.46443	0.840651	0	12	723937	-------++---
W	EUR	12	95090416	T	G	rs61938190	FGD6	0.060897	1.11492	0.019455	1.07679	1.1544	6.12676	9.24e-10	9.03438	9.95706	0.534254	0	12	723937	++++-+++-+++
W	EUR	12	95092297	G	A	rs2060304	FGD6	0.060925	1.11467	0.019449	1.07655	1.15414	6.11488	9.95e-10	9.00205	9.90152	0.539267	0	12	723937	+++--+++-+++
W	EUR	12	95095355	G	A	rs7358643	FGD6	0.339367	1.05547	0.009276	1.0373	1.07397	6.09042	1.16e-09	8.93569	9.08479	0.614066	0	12	723937	++--++++-+++
W	EUR	12	95096472	C	T	rs12310399	FGD6	0.338535	1.05465	0.009265	1.03649	1.07313	6.00437	1.98e-09	8.70417	9.03163	0.618972	0	12	723937	++--++++-+++
W	EUR	12	95097223	C	T	rs7137731	FGD6	0.338709	1.0545	0.009263	1.03635	1.07298	5.98942	2.17e-09	8.66427	9.32234	0.592166	0	12	723937	++--++++-+++
W	EUR	12	95097310	T	C	rs61938192	FGD6	0.060673	1.11739	0.019521	1.07913	1.15701	6.24393	4.4e-10	9.35646	10.12	0.519629	0	12	723937	++++-+++-+++
W	EUR	12	95097423	A	G	rs113017965	FGD6	0.060679	1.11811	0.019535	1.07982	1.15776	6.27999	3.49e-10	9.45677	9.92313	0.537314	0	12	723937	++++-+++++++
W	EUR	12	95098198	C	T	rs57938738	FGD6	0.06193	1.11954	0.019715	1.0809	1.15956	6.30117	3.05e-10	9.51595	9.66054	0.470763	0	11	695507	+++?-+++-+++
W	EUR	12	95102937	G	A	rs7298841	FGD6	0.641838	0.950799	0.008251	0.934626	0.967251	-5.76402	8.43e-09	8.07417	10.629	0.474843	0	12	723937	--++----+---
W	EUR	12	95104443	T	A	rs6538589	FGD6	0.64079	0.951318	0.008263	0.935123	0.967793	-5.69704	1.25e-08	7.90295	10.1386	0.517966	0	12	723937	--++----+---
W	EUR	12	95105935	A	G	rs111915453	FGD6	0.06102	1.1148	0.019428	1.07672	1.15423	6.12874	9.12e-10	9.03979	9.77574	0.550666	0	12	723937	++++-+++-+++
W	EUR	12	95106951	G	C	rs7138545	FGD6	0.642	0.950841	0.008252	0.934668	0.967294	-5.75904	8.68e-09	8.06137	10.4697	0.488695	0	12	723937	--++----+---
W	EUR	12	95108743	C	A	rs6538591	FGD6	0.642102	0.951053	0.008252	0.934878	0.967507	-5.73459	1e-08	7.99872	10.8727	0.453991	0	12	723937	--++----+---
W	EUR	12	95108971	A	G	rs6538592	FGD6	0.652794	0.947727	0.008409	0.931245	0.964501	-5.99802	2.05e-09	8.68722	7.12489	0.713604	0	11	695507	--+?----+---
W	EUR	12	95109612	T	G	rs7306164	FGD6	0.642081	0.950982	0.008252	0.934809	0.967435	-5.74298	9.55e-09	8.02018	10.6732	0.47103	0	12	723937	--++----+---
W	EUR	12	95109727	A	G	rs7306300	FGD6	0.642122	0.950995	0.008252	0.934821	0.967449	-5.7412	9.65e-09	8.01564	10.6725	0.471097	0	12	723937	--++----+---
W	EUR	12	95110271	T	C	rs12319710	FGD6	0.641186	0.951725	0.00825	0.935556	0.968174	-5.65945	1.56e-08	7.8077	10.0883	0.52246	0	12	723937	--++----+---
W	EUR	12	95110483	G	A	rs11107897	FGD6	0.642108	0.950997	0.008253	0.934822	0.967452	-5.74057	9.68e-09	8.014	10.5675	0.480173	0	12	723937	--++----+---
W	EUR	12	95110608	G	A	rs11107898	FGD6	0.64295	0.949761	0.008246	0.933598	0.966203	-5.88604	4.06e-09	8.39096	8.14005	0.700706	0	12	723937	--+-----+---
W	EUR	12	95110850	T	G	rs4132527	FGD6	0.642053	0.9512	0.008254	0.935022	0.967657	-5.71665	1.11e-08	7.95288	10.6659	0.471664	0	12	723937	--++----+---
W	EUR	12	95111748	G	A	rs6538593	FGD6	0.642078	0.951102	0.008253	0.934926	0.967559	-5.72805	1.04e-08	7.98199	10.6659	0.471659	0	12	723937	--++----+---
W	EUR	12	95112771	C	T	rs6538594	FGD6	0.642106	0.950874	0.008252	0.934701	0.967327	-5.75536	8.87e-09	8.05192	10.4275	0.49239	0	12	723937	--++----+---
W	EUR	12	95112847	G	A	rs6538595	FGD6	0.642104	0.950938	0.008252	0.934763	0.967392	-5.74752	9.29e-09	8.03182	10.2904	0.50447	0	12	723937	--++----+---
W	EUR	12	95113293	T	C	rs10859831	FGD6	0.644679	0.950971	0.008298	0.934708	0.967517	-5.71216	1.14e-08	7.94143	10.0483	0.526046	0	12	723937	--++----+---
W	EUR	12	95114192	G	A	rs11107902	FGD6	0.6424	0.951008	0.008392	0.93456	0.967746	-5.64308	1.71e-08	7.76641	10.1135	0.43059	0.0112255	11	704060	--++----+--?
W	EUR	12	95114333	T	C	rs11836398	FGD6	0.642134	0.950915	0.008252	0.934741	0.967369	-5.75032	9.14e-09	8.03899	10.3312	0.500866	0	12	723937	--++----+---
W	EUR	12	95114702	A	T	rs7484972	FGD6	0.642095	0.950639	0.008249	0.934472	0.967086	-5.7842	7.48e-09	8.12612	10.1305	0.51869	0	12	723937	--++----+---
W	EUR	12	95115328	T	C	rs55880537	FGD6	0.060303	1.11729	0.019904	1.07828	1.15771	6.11644	9.86e-10	9.0063	10.147	0.427694	0.0144854	11	704060	++++-+++-++?
W	EUR	12	95115990	T	C	rs6538596	FGD6	0.642257	0.95114	0.008252	0.934967	0.967593	-5.72485	1.06e-08	7.97381	9.93005	0.53669	0	12	723937	--++----+---
W	EUR	12	95116584	G	A	rs7977572	FGD6	0.642169	0.950924	0.008253	0.934749	0.96738	-5.74883	9.22e-09	8.03517	9.96568	0.533477	0	12	723937	--++----+---
W	EUR	12	95118255	A	G	rs9919687	FGD6	0.171171	1.06265	0.011674	1.03977	1.08604	5.47199	4.55e-08	7.34157	16.6094	0.119971	0.337726	12	723937	+++-++++-+++
W	EUR	12	95118526	T	C	rs10777668	FGD6	0.642183	0.950753	0.008251	0.93458	0.967205	-5.76923	8.17e-09	8.08756	10.0072	0.529741	0	12	723937	--++----+---
W	EUR	12	95119421	A	C	rs6538597	FGD6	0.642017	0.950607	0.008251	0.934435	0.967058	-5.78624	7.39e-09	8.1314	9.88267	0.540971	0	12	723937	--++----+---
W	EUR	12	95121165	C	T	rs10735328	FGD6	0.642345	0.950289	0.00825	0.934118	0.96674	-5.82279	5.94e-09	8.22596	9.78633	0.549703	0	12	723937	--++----+---
W	EUR	12	95122165	C	A	rs7308047	FGD6	0.642215	0.950859	0.008256	0.934678	0.96732	-5.75428	8.93e-09	8.04914	10.1692	0.515231	0	12	723937	--++----+---
W	EUR	12	95123067	T	C	rs6538598	FGD6	0.642178	0.950276	0.00825	0.934106	0.966726	-5.82455	5.88e-09	8.23053	9.67419	0.55991	0	12	723937	--++----+---
W	EUR	12	95123635	C	T	rs11107905	FGD6	0.642033	0.950614	0.008252	0.93444	0.967069	-5.78445	7.47e-09	8.12678	9.82584	0.546118	0	12	723937	--++----+---
W	EUR	12	95123931	G	T	rs11107906	FGD6	0.643882	0.950391	0.008395	0.933937	0.967136	-5.70998	1.16e-08	7.93588	8.50531	0.579603	0	11	704060	--++----+--?
W	EUR	12	95124447	C	T	rs7954260	FGD6	0.171168	1.06249	0.011675	1.0396	1.08587	5.45658	4.97e-08	7.3039	16.8338	0.112887	0.346554	12	723937	+++-++++-+++
W	EUR	12	95126645	C	T	rs10859835	FGD6	0.641519	0.950565	0.008256	0.934384	0.967027	-5.78765	7.33e-09	8.13502	9.27612	0.596422	0	12	723937	--++----+---
W	EUR	12	95127120	A	T	rs7300443	FGD6	0.643674	0.95019	0.008264	0.933991	0.966669	-5.82423	5.89e-09	8.2297	7.77788	0.733052	0	12	723937	--+-----+---
W	EUR	12	95128513	A	G	rs10859837	FGD6	0.129094	1.09129	0.01341	1.065	1.11822	7.02296	2.26e-12	11.6463	17.0838	0.105421	0.356115	12	723937	+++-++++-+++
W	EUR	12	95128701	T	C	rs7134554	FGD6	0.338315	0.94912	0.008211	0.933026	0.965491	-5.9847	2.23e-09	8.65169	10.7028	0.468489	0	12	723937	------+--+--
W	EUR	12	95129878	T	C	rs7959849	FGD6	0.680587	0.941028	0.008356	0.924651	0.957696	-6.78547	1.2e-11	10.9209	16.4321	0.125832	0.330578	12	723937	--++--------
W	EUR	12	95129954	A	G	rs7960157	FGD6	0.680781	0.940972	0.008358	0.92459	0.957644	-6.7899	1.16e-11	10.9342	16.3212	0.129619	0.32603	12	723937	--++--------
W	EUR	12	95131765	T	A	rs59417306	FGD6	0.060994	1.1114	0.019414	1.07335	1.1508	5.94263	2.88e-09	8.54001	10.4913	0.48681	0	12	723937	+++--+++-+++
W	EUR	12	95131865	A	C	rs6538602	FGD6	0.682497	0.939473	0.00835	0.923107	0.956129	-6.96358	3.45e-12	11.4626	14.2073	0.221736	0.225748	12	723937	--+---------
W	EUR	12	95132117	T	C	rs7970810	FGD6	0.682341	0.939708	0.00835	0.923343	0.956364	-6.93752	4.14e-12	11.3825	14.4364	0.209781	0.238035	12	723937	--+---------
W	EUR	12	95132236	G	A	rs9804833	FGD6	0.132931	1.09227	0.013137	1.06652	1.11864	7.25167	4.29e-13	12.3676	14.2592	0.218981	0.228569	12	723937	++++++++-+++
W	EUR	12	95132243	T	C	rs7971041	FGD6	0.68255	0.939395	0.00835	0.923029	0.956051	-6.97215	3.24e-12	11.4891	14.1861	0.222866	0.224594	12	723937	--+---------
W	EUR	12	95133700	A	T	rs61937893	FGD6	0.047847	1.12863	0.021827	1.08584	1.17309	6.13732	8.65e-10	9.06317	11.895	0.371584	0.075245	12	723937	++++-+++++++
W	EUR	12	95134311	G	A	rs7957829	FGD6	0.682895	0.940459	0.008498	0.923802	0.957416	-6.73296	1.72e-11	10.7637	13.3985	0.202237	0.253647	11	704060	--+--------?
W	EUR	12	95144831	A	G	rs61937896	FGD6	0.061274	1.11115	0.019361	1.0732	1.15044	5.94501	2.84e-09	8.5463	10.5356	0.482947	0	12	723937	+++--+++-+++
W	EUR	12	95144881	C	G	rs112817027	FGD6	0.061093	1.11284	0.019759	1.07411	1.15297	5.91626	3.39e-09	8.47037	9.7754	0.460414	0	11	704060	+++--+++-++?
W	EUR	12	95150582	T	C	rs61937899	FGD6	0.061157	1.10953	0.019362	1.07159	1.14883	5.85381	4.94e-09	8.30668	10.301	0.503532	0	12	723937	+++--+++-+++
W	EUR	12	95158621	C	T	rs61937919	FGD6	0.060971	1.10907	0.019362	1.07112	1.14836	5.82752	5.78e-09	8.23825	10.6914	0.469465	0	12	723937	+++--+++-+++
W	EUR	12	95159100	A	G	rs12312350	FGD6	0.093739	1.09179	0.016241	1.05995	1.12458	5.81686	6.16e-09	8.21056	10.552	0.393466	0.0523154	11	704060	+++-+++++++?
W	EUR	12	95159485	G	C	rs61937920	FGD6	0.047742	1.12788	0.021826	1.0851	1.17235	6.10012	1.09e-09	8.96197	12.7735	0.308387	0.138842	12	723937	++++-+++++++
W	EUR	12	95164264	T	C	rs7136967	FGD6	0.641761	0.937113	0.008431	0.920588	0.953934	-7.15574	8.66e-13	12.0623	12.5776	0.182668	0.284443	10	645497	--+-?-+--?--
W	EUR	12	95164703	A	T	rs11615095	FGD6	0.191379	0.945877	0.009532	0.927194	0.964936	-5.46684	4.69e-08	7.32896	15.9174	0.144226	0.308931	12	723937	------+--+--
W	EUR	12	95165333	C	T	rs6538610	FGD6	0.642531	0.937315	0.008419	0.920813	0.954113	-7.14336	9.48e-13	12.0232	11.4166	0.24823	0.211675	10	645497	--+-?----?--
W	EUR	12	95165629	T	C	rs61937921	FGD6	0.060893	1.11073	0.019405	1.0727	1.15011	5.90778	3.56e-09	8.44806	10.1449	0.517402	0	12	723937	+++--+++-+++
W	EUR	12	95168109	A	G	rs4762624	FGD6	0.093876	1.08967	0.015898	1.05851	1.12174	5.8011	6.76e-09	8.16978	10.2444	0.508547	0	12	723937	+++-++++++++
W	EUR	12	95168762	T	A	rs11832540	FGD6	0.650053	0.940132	0.008143	0.924172	0.956367	-7.06706	1.65e-12	11.7836	13.8373	0.242126	0.205048	12	723937	--+---+-----
W	EUR	12	95171164	G	A	rs7136350	FGD6	0.166684	1.08627	0.012272	1.06221	1.11086	7.2428	4.58e-13	12.3392	17.5054	0.063903	0.428747	11	704060	+++-+++++++?
W	EUR	12	95171794	C	T	rs7973048	FGD6	0.060652	1.11267	0.019815	1.07383	1.15291	5.8898	3.97e-09	8.40081	10.1668	0.425982	0.0164074	11	704060	+++--+++-++?
[truncated: 3,050 more rows]

## Sheet: S3_all_GWAS_clumps
Phenotype	Ancestry	#CHROM	POS	Lead_SNP_Nearest_Gene	Lead_SNP_RSID	MIN_POS	MAX_POS	P	TOTAL	NONSIG	S0.05	S0.01	S0.001	S0.0001	SP2
W	AFR	2	70875169	CD207/LINC01143	rs11374669	70803208	70913687	1.87e-08	27	15	0	0	4	8	chr2:70803208:G:T,chr2:70810750:T:C,chr2:70814144:G:A,chr2:70821705:G:A,chr2:70823171:T:G,chr2:70830955:G:T,chr2:70834378:G:C,chr2:70874948:T:A,chr2:70876465:T:G,chr2:70877646:T:C,chr2:70877895:A:G,chr2:70877994:T:G,chr2:70880019:A:G,chr2:70884060:G:A,chr2:70886008:C:T,chr2:70887591:C:T,chr2:70887870:G:T,chr2:70890364:T:C,chr2:70891627:G:A,chr2:70893806:C:T,chr2:70894783:G:A,chr2:70895823:A:C,chr…
W	AFR	20	53466491	TSHZ2	rs115075315	53416316	53504437	1.05e-08	20	3	2	4	0	11	chr20:53416316:C:T,chr20:53418786:A:G,chr20:53421049:T:G,chr20:53423295:A:G,chr20:53427693:G:A,chr20:53442784:A:G,chr20:53466659:A:G,chr20:53468440:T:G,chr20:53480105:G:A,chr20:53481872:G:A,chr20:53490951:C:T,chr20:53494573:T:C,chr20:53499618:T:C,chr20:53500607:G:A,chr20:53501129:C:T,chr20:53501357:C:T,chr20:53501611:T:C,chr20:53502355:G:A,chr20:53503161:G:C,chr20:53504437:A:T
W	EAS	1	22139327	WNT4	rs61768001	22020377	22166394	1.82e-18	105	2	3	5	4	91	chr1:22020377:G:C,chr1:22020903:A:G,chr1:22021916:G:A,chr1:22022094:A:C,chr1:22022893:C:T,chr1:22023122:A:G,chr1:22024341:C:T,chr1:22025547:T:G,chr1:22026643:G:A,chr1:22028045:C:A,chr1:22031964:C:T,chr1:22032080:C:T,chr1:22032102:G:A,chr1:22032254:C:T,chr1:22032296:G:T,chr1:22032343:C:T,chr1:22032413:C:T,chr1:22032589:C:G,chr1:22032899:G:A,chr1:22033205:C:T,chr1:22033346:T:C,chr1:22033429:C:T,chr…
W	EAS	2	11591720	GREB1	rs2884374	11562535	11616960	1.47e-10	57	6	1	7	9	34	chr2:11562535:A:C,chr2:11564710:G:T,chr2:11571949:G:T,chr2:11578465:T:C,chr2:11578732:T:C,chr2:11581409:T:G,chr2:11581886:C:G,chr2:11581956:T:C,chr2:11581976:T:A,chr2:11582342:G:A,chr2:11582449:G:A,chr2:11582895:T:C,chr2:11582984:G:A,chr2:11583732:G:A,chr2:11584349:G:A,chr2:11584454:G:T,chr2:11584558:G:A,chr2:11584923:C:T,chr2:11585115:G:A,chr2:11586961:G:T,chr2:11587381:A:G,chr2:11587862:C:G,chr…
W	EAS	2	49092263	FSHR	rs11689334	49018269	49160625	1.17e-09	147	4	3	1	15	124	chr2:49018269:C:T,chr2:49021841:C:T,chr2:49022873:C:T,chr2:49032563:G:T,chr2:49033096:G:A,chr2:49035532:A:C,chr2:49038693:C:A,chr2:49039715:T:C,chr2:49041339:C:G,chr2:49041648:G:A,chr2:49043101:T:G,chr2:49045257:C:T,chr2:49045631:G:A,chr2:49047284:G:A,chr2:49048723:G:T,chr2:49049507:C:T,chr2:49049632:C:T,chr2:49050904:C:A,chr2:49052381:G:A,chr2:49052533:T:C,chr2:49052694:C:T,chr2:49053216:C:T,chr…
W	EAS	6	151505114	CCDC170	rs7740302	151373127	151573581	4.62e-09	156	12	34	43	16	51	chr6:151373127:C:A,chr6:151373130:A:G,chr6:151413863:T:C,chr6:151416042:G:T,chr6:151418178:C:T,chr6:151422927:C:T,chr6:151424387:C:T,chr6:151426017:C:T,chr6:151427860:T:C,chr6:151428634:C:T,chr6:151432305:C:T,chr6:151432559:G:C,chr6:151435164:A:G,chr6:151435192:T:C,chr6:151435202:G:A,chr6:151435207:A:G,chr6:151436117:A:C,chr6:151436907:C:G,chr6:151438495:T:C,chr6:151438764:C:A,chr6:151438820:C:A,…
W	EAS	7	46632024	HMGN1P19	rs10951860	46602710	46663062	3.83e-09	82	4	1	13	13	51	chr7:46602710:C:T,chr7:46602799:C:T,chr7:46603136:G:A,chr7:46603239:T:A,chr7:46603382:G:A,chr7:46603395:C:T,chr7:46603948:G:A,chr7:46604347:G:A,chr7:46605746:G:A,chr7:46605753:G:T,chr7:46605757:A:T,chr7:46605940:T:C,chr7:46606481:A:G,chr7:46606994:C:G,chr7:46607137:A:G,chr7:46607443:G:T,chr7:46608745:G:T,chr7:46609927:C:T,chr7:46613884:G:A,chr7:46613885:A:T,chr7:46613962:C:T,chr7:46614853:G:A,chr…
W	EAS	9	22087605	CDKN2B-AS1	rs80076828	21950677	22124369	2.63e-09	147	4	22	20	25	76	chr9:21950677:T:C,chr9:21950740:A:T,chr9:21950745:A:T,chr9:21950783:G:A,chr9:21950880:A:G,chr9:21950961:A:T,chr9:21951019:G:C,chr9:21953697:A:T,chr9:21954561:C:G,chr9:21956022:C:T,chr9:21956079:G:A,chr9:21958280:T:C,chr9:21959247:T:C,chr9:21959901:C:T,chr9:21959967:C:T,chr9:21963454:T:A,chr9:21963842:C:A,chr9:21964016:C:A,chr9:21964169:T:A,chr9:21964347:T:G,chr9:21968713:C:A,chr9:21972446:C:T,chr…
W	EAS	12	95233461	VEZT	rs6538622	94967223	95323721	2.9e-08	336	133	34	54	40	75	chr12:94967223:T:A,chr12:94967275:A:G,chr12:94986063:T:C,chr12:94986494:T:C,chr12:94986531:C:T,chr12:94987776:A:G,chr12:94987926:G:A,chr12:95001538:T:G,chr12:95003130:C:A,chr12:95003776:C:T,chr12:95010408:G:A,chr12:95010882:T:G,chr12:95019032:T:C,chr12:95019843:T:C,chr12:95025556:A:G,chr12:95025858:T:G,chr12:95026193:T:C,chr12:95032693:T:C,chr12:95032794:C:T,chr12:95033935:A:C,chr12:95035603:A:C,…
W	EUR	1	22027552	LINC00339	rs41307810	22027552	22027552	1.26e-10	0	0	0	0	0	0	.
W	EUR	1	22109953	CDC42/WNT4	rs7412010	22020903	22166394	1.42e-26	56	2	0	1	0	53	chr1:22020903:A:G,chr1:22021916:G:A,chr1:22022893:C:T,chr1:22026643:G:A,chr1:22028045:C:A,chr1:22029485:G:A,chr1:22030736:A:T,chr1:22031964:C:T,chr1:22032102:G:A,chr1:22032296:G:T,chr1:22032343:C:T,chr1:22033346:T:C,chr1:22034736:C:T,chr1:22038465:C:A,chr1:22039196:C:T,chr1:22039336:T:C,chr1:22039609:T:C,chr1:22040580:T:G,chr1:22044572:T:G,chr1:22048315:T:C,chr1:22051787:T:A,chr1:22052387:C:A,chr…
W	EUR	1	22115372	CDC42/WNT4	rs1474647	22022094	22151000	3.71e-09	95	5	4	24	1	61	chr1:22022094:A:C,chr1:22023122:A:G,chr1:22024341:C:T,chr1:22025547:T:G,chr1:22026834:A:C,chr1:22026921:A:G,chr1:22026998:C:T,chr1:22027331:T:C,chr1:22027381:A:G,chr1:22027753:T:A,chr1:22028044:G:A,chr1:22028094:T:C,chr1:22028304:T:C,chr1:22028373:C:T,chr1:22028796:G:C,chr1:22029085:A:G,chr1:22029231:A:C,chr1:22029605:C:T,chr1:22029645:C:T,chr1:22029662:A:G,chr1:22030147:G:C,chr1:22030316:T:A,chr…
W	EUR	1	22153666	LOC105376845	rs7517829	22153666	22199834	1.99e-14	7	0	0	0	6	1	chr1:22153819:G:A,chr1:22186597:G:C,chr1:22187397:A:T,chr1:22195560:C:T,chr1:22195569:G:A,chr1:22196434:T:C,chr1:22199834:G:A
W	EUR	1	22159378	LOC105376845/LOC105376850	rs16826658	22156132	22185101	8.14e-19	28	8	0	1	0	19	chr1:22156132:C:A,chr1:22157091:G:A,chr1:22157137:C:T,chr1:22158052:G:A,chr1:22159184:A:G,chr1:22159524:T:A,chr1:22159904:C:T,chr1:22160543:C:T,chr1:22161007:C:T,chr1:22162707:G:A,chr1:22164872:C:T,chr1:22165172:G:T,chr1:22166029:T:C,chr1:22166245:C:T,chr1:22171881:C:T,chr1:22172272:C:A,chr1:22172331:C:G,chr1:22175135:T:C,chr1:22175353:A:G,chr1:22177598:G:A,chr1:22178072:C:G,chr1:22179116:A:G,chr…
W	EUR	1	22230251	LOC107985377	rs10917181	22192828	22281721	4.46e-08	59	7	3	3	11	35	chr1:22192828:A:G,chr1:22207749:C:T,chr1:22211535:A:G,chr1:22212104:G:A,chr1:22213320:T:G,chr1:22213624:C:T,chr1:22214843:G:A,chr1:22216875:C:T,chr1:22216990:G:A,chr1:22217296:A:C,chr1:22218804:C:T,chr1:22219053:C:G,chr1:22220599:G:T,chr1:22220859:T:C,chr1:22221487:G:A,chr1:22221759:C:T,chr1:22223864:A:G,chr1:22224878:A:G,chr1:22225256:A:G,chr1:22225320:C:T,chr1:22228795:T:G,chr1:22229949:A:T,chr…
W	EUR	1	22245630	LOC107985377	rs7553227	22212136	22266892	2.79e-08	46	5	3	2	14	22	chr1:22212136:C:A,chr1:22212764:C:T,chr1:22213196:A:C,chr1:22214785:C:T,chr1:22215691:C:T,chr1:22221849:T:C,chr1:22222326:T:C,chr1:22222601:G:A,chr1:22225286:T:A,chr1:22226476:C:G,chr1:22226688:C:A,chr1:22226985:G:T,chr1:22230213:C:T,chr1:22230283:G:A,chr1:22231534:C:T,chr1:22232946:C:T,chr1:22232952:C:T,chr1:22233161:C:T,chr1:22233437:T:C,chr1:22236612:C:T,chr1:22236660:G:A,chr1:22237000:G:A,chr…
W	EUR	1	169498416	LOC120893165/F5	rs1894692	168540523	169764425	1.79e-10	14	2	0	0	3	9	chr1:168540523:A:T,chr1:168741790:C:T,chr1:169056816:G:A,chr1:169063639:C:T,chr1:169121510:T:C,chr1:169191220:C:T,chr1:169238941:T:C,chr1:169247174:G:C,chr1:169283018:G:A,chr1:169355555:C:T,chr1:169465789:T:C,chr1:169549811:C:T,chr1:169689987:C:T,chr1:169764425:A:G
W	EUR	2	11519874	GREB1	rs13432124	11442860	11533908	6.55e-15	18	3	0	0	0	15	chr2:11442860:G:C,chr2:11443677:A:G,chr2:11514406:C:T,chr2:11514462:T:C,chr2:11514748:C:T,chr2:11515058:A:G,chr2:11515133:T:C,chr2:11515361:G:T,chr2:11515558:G:T,chr2:11516184:A:G,chr2:11516381:C:T,chr2:11516782:A:G,chr2:11517874:C:T,chr2:11518846:C:T,chr2:11519075:T:C,chr2:11520489:C:T,chr2:11520829:G:C,chr2:11533908:A:G
W	EUR	2	11530179	GREB1	rs10929753	11482542	11552346	2.18e-14	39	14	0	0	1	24	chr2:11482542:G:C,chr2:11489165:T:C,chr2:11500074:T:C,chr2:11501727:G:T,chr2:11502131:A:G,chr2:11506766:G:A,chr2:11509023:C:T,chr2:11511181:T:C,chr2:11512669:G:T,chr2:11514987:T:C,chr2:11517056:T:C,chr2:11518445:C:T,chr2:11518519:G:A,chr2:11521014:C:T,chr2:11522052:T:C,chr2:11523212:A:T,chr2:11523294:T:C,chr2:11524223:T:C,chr2:11526213:T:G,chr2:11527501:A:G,chr2:11528467:C:T,chr2:11534169:A:C,chr…
W	EUR	2	11588262	GREB1	rs59129126	11541312	11611506	5.36e-17	79	3	0	0	1	75	chr2:11541312:G:A,chr2:11541442:C:T,chr2:11541446:G:A,chr2:11541453:G:C,chr2:11541892:A:G,chr2:11542670:T:A,chr2:11542948:G:T,chr2:11543198:A:G,chr2:11543297:T:G,chr2:11543324:C:T,chr2:11543505:G:A,chr2:11543772:A:C,chr2:11544189:T:C,chr2:11544279:C:T,chr2:11545432:G:A,chr2:11551098:C:T,chr2:11552538:A:C,chr2:11561717:G:A,chr2:11562535:A:C,chr2:11564710:G:T,chr2:11568707:C:G,chr2:11570590:G:A,chr…
W	EUR	2	67629358	LOC105374786	rs6546324	67549386	67642640	5.96e-15	131	8	1	2	47	73	chr2:67549386:A:C,chr2:67549728:G:A,chr2:67550026:G:C,chr2:67552256:C:T,chr2:67552787:C:G,chr2:67553932:G:T,chr2:67555603:C:A,chr2:67557893:G:A,chr2:67560216:G:T,chr2:67567332:C:T,chr2:67567344:T:C,chr2:67567457:C:G,chr2:67568330:T:A,chr2:67569038:G:A,chr2:67569947:T:A,chr2:67572832:G:A,chr2:67573206:A:T,chr2:67574164:C:T,chr2:67574408:G:A,chr2:67575818:C:T,chr2:67576776:T:C,chr2:67581632:C:T,chr…
W	EUR	2	164531467	GRB14	rs939643	164466654	164610558	6.42e-09	49	0	2	19	9	19	chr2:164466654:C:T,chr2:164466945:C:A,chr2:164470760:C:T,chr2:164471167:A:G,chr2:164478359:G:A,chr2:164479368:T:C,chr2:164480573:C:A,chr2:164480784:G:A,chr2:164483798:C:T,chr2:164490659:G:A,chr2:164499833:G:A,chr2:164502162:G:A,chr2:164510082:C:A,chr2:164513551:A:C,chr2:164520593:T:C,chr2:164528548:G:T,chr2:164532390:G:A,chr2:164536847:T:G,chr2:164538070:T:G,chr2:164538927:T:C,chr2:164544977:A:G,…
W	EUR	3	128096632	RUVBL1	rs4058156	127991295	128430423	6.52e-11	245	11	0	2	2	230	chr3:127991295:C:T,chr3:127991631:G:A,chr3:127996290:A:G,chr3:127997068:T:A,chr3:127997419:G:A,chr3:127997742:A:G,chr3:127998859:T:C,chr3:128000815:A:G,chr3:128001077:T:C,chr3:128001884:T:C,chr3:128001897:C:T,chr3:128002198:G:T,chr3:128002399:C:T,chr3:128002490:T:A,chr3:128002532:T:C,chr3:128002592:C:T,chr3:128002625:G:A,chr3:128002665:G:A,chr3:128002700:A:T,chr3:128002760:G:C,chr3:128003016:G:A,…
W	EUR	3	190850149	GMNC	rs9872656	190794367	190860185	2.08e-08	254	4	42	94	5	109	chr3:190794367:T:C,chr3:190796921:G:A,chr3:190797002:A:G,chr3:190797084:G:C,chr3:190797102:T:G,chr3:190797119:C:T,chr3:190797196:T:C,chr3:190797260:T:C,chr3:190797282:A:G,chr3:190797312:G:A,chr3:190797385:A:T,chr3:190797478:T:C,chr3:190797479:G:A,chr3:190797489:T:G,chr3:190797495:C:T,chr3:190797500:G:C,chr3:190797511:G:A,chr3:190797560:T:C,chr3:190797568:A:G,chr3:190797714:G:C,chr3:190797723:T:C,…
W	EUR	4	55136805	KDR	rs9312656	55123508	55161406	2.6e-24	88	1	0	0	1	86	chr4:55123508:T:A,chr4:55124787:G:C,chr4:55125564:T:C,chr4:55125660:G:A,chr4:55125858:G:A,chr4:55125900:A:G,chr4:55125938:C:G,chr4:55125972:C:T,chr4:55126199:G:A,chr4:55127301:T:C,chr4:55127748:C:T,chr4:55128043:T:C,chr4:55128059:T:A,chr4:55128099:A:T,chr4:55128147:T:G,chr4:55128894:C:T,chr4:55129074:C:A,chr4:55129075:C:T,chr4:55129076:T:G,chr4:55129261:C:T,chr4:55129402:C:A,chr4:55129480:T:G,chr…
W	EUR	4	55157917	KDR	rs17774236	55140169	55161876	3.62e-14	25	3	0	0	0	22	chr4:55140169:G:A,chr4:55158395:C:G,chr4:55158531:A:C,chr4:55159510:A:G,chr4:55159830:C:T,chr4:55159958:G:A,chr4:55160022:G:A,chr4:55160025:C:T,chr4:55160295:T:C,chr4:55160434:A:G,chr4:55160559:G:C,chr4:55160600:G:A,chr4:55160601:T:C,chr4:55160602:G:A,chr4:55160698:C:T,chr4:55160935:T:G,chr4:55160936:T:C,chr4:55160940:T:G,chr4:55161120:G:C,chr4:55161351:C:T,chr4:55161369:A:G,chr4:55161410:T:A,chr…
W	EUR	4	55163307	KDR	rs3986292	55124875	55163413	9.32e-11	10	0	0	0	0	10	chr4:55124875:G:T,chr4:55132266:G:C,chr4:55136691:A:G,chr4:55140706:T:C,chr4:55153429:A:T,chr4:55159449:G:A,chr4:55162703:G:C,chr4:55162734:G:A,chr4:55162893:T:C,chr4:55163413:T:C
W	EUR	4	94714026	LOC110121104/BMPR1B-DT	rs2036754	94697369	94749944	1.13e-10	11	0	0	0	3	8	chr4:94697369:A:G,chr4:94699074:G:T,chr4:94700981:G:C,chr4:94704163:C:T,chr4:94707330:G:A,chr4:94714211:T:C,chr4:94716843:A:T,chr4:94721664:A:G,chr4:94732513:C:A,chr4:94740709:C:T,chr4:94749944:A:G
W	EUR	6	19763864	LNC-LBCS	rs9350179	19699935	19824740	4.42e-09	123	7	17	23	16	60	chr6:19699935:T:C,chr6:19702653:C:T,chr6:19705891:C:T,chr6:19706530:G:A,chr6:19707864:A:G,chr6:19708250:A:G,chr6:19712062:G:A,chr6:19713104:C:T,chr6:19717211:G:A,chr6:19717645:T:C,chr6:19717926:C:T,chr6:19718118:C:G,chr6:19721450:T:A,chr6:19721658:A:G,chr6:19724758:C:T,chr6:19725852:A:G,chr6:19730428:A:T,chr6:19734043:A:C,chr6:19736496:T:C,chr6:19739147:T:G,chr6:19742583:T:C,chr6:19742632:G:C,chr…
W	EUR	6	73811471	CD109	rs3005482	73728266	74051486	2e-11	223	10	1	5	54	153	chr6:73728266:G:A,chr6:73735664:C:T,chr6:73741052:C:T,chr6:73748110:T:G,chr6:73749014:G:A,chr6:73749542:A:G,chr6:73751555:C:G,chr6:73753382:G:A,chr6:73754171:G:A,chr6:73756153:G:A,chr6:73756654:T:C,chr6:73759137:C:A,chr6:73760009:C:A,chr6:73760178:C:T,chr6:73761204:C:G,chr6:73762128:G:A,chr6:73765047:C:T,chr6:73767422:G:A,chr6:73767429:C:T,chr6:73767566:A:T,chr6:73769157:C:T,chr6:73771353:G:A,chr…
W	EUR	6	73917859	CD109/TXNP7	rs9341440	73878261	74334916	2.97e-08	155	54	1	34	19	47	chr6:73878261:C:T,chr6:73882509:A:G,chr6:73883046:A:T,chr6:73883667:C:T,chr6:73885148:A:G,chr6:73885362:A:G,chr6:73885646:A:T,chr6:73887644:T:C,chr6:73888005:T:A,chr6:73888347:C:T,chr6:73888486:A:G,chr6:73889156:T:C,chr6:73890277:A:C,chr6:73890447:C:G,chr6:73890541:T:C,chr6:73891253:A:T,chr6:73891988:A:G,chr6:73892158:A:G,chr6:73892239:C:T,chr6:73893948:A:G,chr6:73894164:A:G,chr6:73896090:G:A,chr…
W	EUR	6	74120884	LOC101928516	rs146996419	73877090	74355563	1.59e-08	496	116	22	24	144	190	chr6:73877090:A:G,chr6:73931861:C:G,chr6:73931873:C:G,chr6:73936695:C:T,chr6:73938832:C:T,chr6:73942929:A:T,chr6:73943332:A:G,chr6:73946697:T:C,chr6:73951369:T:C,chr6:73953296:T:C,chr6:73953555:C:T,chr6:73954534:A:G,chr6:73960124:G:A,chr6:73961910:A:G,chr6:73962640:G:T,chr6:73964737:C:G,chr6:73965970:C:T,chr6:73967524:C:T,chr6:73968114:A:G,chr6:73971797:G:A,chr6:73973679:C:T,chr6:73978807:C:G,chr…
W	EUR	6	127116472	LOC105377989	rs2800708	127059337	127211662	3.1e-10	162	5	9	49	9	90	chr6:127059337:C:T,chr6:127060915:A:G,chr6:127062715:T:A,chr6:127063389:T:C,chr6:127066222:A:G,chr6:127066942:T:C,chr6:127067041:C:T,chr6:127067307:T:G,chr6:127069540:A:G,chr6:127069574:T:A,chr6:127069704:G:C,chr6:127070325:G:A,chr6:127070699:C:G,chr6:127071276:A:G,chr6:127071319:C:T,chr6:127071832:G:A,chr6:127072062:C:T,chr6:127075070:C:T,chr6:127076095:T:C,chr6:127077900:A:G,chr6:127077911:T:C,…
W	EUR	6	151351050	AKAP12	rs61748676	151351050	151507514	9.02e-10	4	4	0	0	0	0	chr6:151422950:C:T,chr6:151493534:C:T,chr6:151504765:A:G,chr6:151507514:A:T
W	EUR	6	151401330	LOC124901232	rs7759049	151377978	151450778	4.97e-10	52	14	1	0	0	37	chr6:151377978:T:A,chr6:151379906:C:T,chr6:151384199:G:T,chr6:151385435:A:G,chr6:151385528:C:T,chr6:151385753:T:C,chr6:151386750:G:C,chr6:151387412:G:A,chr6:151387557:G:A,chr6:151391144:C:T,chr6:151391463:T:G,chr6:151392202:C:T,chr6:151392914:G:A,chr6:151393571:C:T,chr6:151393970:G:A,chr6:151394840:G:T,chr6:151395387:T:C,chr6:151395725:T:C,chr6:151396167:A:G,chr6:151396399:C:T,chr6:151396520:G:A,…
W	EUR	6	151405165	RMND1	rs1065310	151405165	151405165	2.14e-09	0	0	0	0	0	0	.
W	EUR	6	151412916	RMND1	rs9383891	151409649	151517057	1.85e-11	45	40	0	1	0	4	chr6:151409649:A:G,chr6:151413062:C:G,chr6:151417816:T:A,chr6:151419832:T:C,chr6:151426017:C:T,chr6:151427860:T:C,chr6:151429230:T:G,chr6:151432305:C:T,chr6:151432559:G:C,chr6:151435164:A:G,chr6:151435192:T:C,chr6:151435207:A:G,chr6:151438057:T:G,chr6:151445417:G:A,chr6:151447360:A:G,chr6:151448878:A:G,chr6:151450771:G:T,chr6:151451260:T:A,chr6:151451434:A:G,chr6:151455534:C:T,chr6:151458093:C:T,…
W	EUR	6	151481102	LOC124901434/CCDC170	rs140993356	151322750	151523515	6.36e-24	69	1	0	0	1	67	chr6:151322750:T:C,chr6:151323062:C:T,chr6:151343230:C:T,chr6:151364459:A:T,chr6:151368706:G:A,chr6:151369054:C:T,chr6:151369634:A:T,chr6:151372274:G:A,chr6:151372381:G:A,chr6:151372473:T:C,chr6:151372702:C:T,chr6:151373127:C:A,chr6:151373130:A:G,chr6:151373202:T:C,chr6:151373369:A:G,chr6:151373881:G:A,chr6:151375169:C:T,chr6:151375881:T:A,chr6:151376381:C:T,chr6:151379758:T:C,chr6:151381102:T:C,…
W	EUR	6	151503727	CCDC170	rs188016086	150530320	152440863	1.37e-18	20	11	1	0	1	7	chr6:150530320:C:T,chr6:150611402:A:G,chr6:150945409:G:T,chr6:151086552:C:G,chr6:151168997:C:T,chr6:151196825:G:A,chr6:151251102:G:T,chr6:151251313:C:T,chr6:151353850:G:C,chr6:151361564:C:T,chr6:151369834:G:A,chr6:151420454:A:C,chr6:151438545:G:A,chr6:151446680:G:A,chr6:151517907:C:T,chr6:151523578:C:T,chr6:151680822:A:G,chr6:151787549:G:T,chr6:151804193:A:C,chr6:152440863:G:A
W	EUR	6	151520459	CCDC170	rs7775980	151381307	151588215	2.8e-25	213	39	29	27	12	106	chr6:151381307:G:C,chr6:151400614:A:G,chr6:151406410:T:C,chr6:151407579:C:T,chr6:151409667:C:T,chr6:151410290:T:C,chr6:151410838:C:T,chr6:151410882:T:C,chr6:151410982:A:G,chr6:151411250:C:T,chr6:151411765:A:G,chr6:151412078:C:T,chr6:151412926:C:T,chr6:151414949:T:G,chr6:151415888:C:G,chr6:151416996:G:A,chr6:151417431:A:G,chr6:151417719:A:G,chr6:151418026:G:A,chr6:151418052:T:C,chr6:151418109:A:G,…
W	EUR	6	151534608	CCDC170	rs9383580	151412875	151841146	1.99e-11	19	19	0	0	0	0	chr6:151412875:C:T,chr6:151422803:T:C,chr6:151428848:T:C,chr6:151439803:G:A,chr6:151558485:T:C,chr6:151563926:C:T,chr6:151595720:G:C,chr6:151596888:G:A,chr6:151601519:G:A,chr6:151616544:C:T,chr6:151622167:C:G,chr6:151638541:C:G,chr6:151644205:G:A,chr6:151700848:A:G,chr6:151703621:C:T,chr6:151748878:T:C,chr6:151769416:G:A,chr6:151823570:T:C,chr6:151841146:C:T
W	EUR	6	151591492	CCDC170	rs144234957	151555133	151621492	4.31e-13	5	1	0	0	0	4	chr6:151555133:C:T,chr6:151590159:A:G,chr6:151600388:C:T,chr6:151610723:C:T,chr6:151621492:T:C
W	EUR	6	151684094	ESR1	rs75134544	151593008	151684094	3.12e-12	51	0	0	0	0	51	chr6:151593008:A:G,chr6:151593056:T:C,chr6:151593130:T:C,chr6:151593783:A:G,chr6:151593932:G:A,chr6:151594104:T:G,chr6:151594777:A:G,chr6:151595259:T:C,chr6:151595863:G:C,chr6:151596002:C:T,chr6:151596133:C:A,chr6:151596292:T:C,chr6:151596687:C:T,chr6:151596752:T:A,chr6:151596951:T:G,chr6:151596975:C:T,chr6:151597485:A:G,chr6:151597893:C:T,chr6:151597978:C:A,chr6:151598006:G:A,chr6:151598230:C:T,…
W	EUR	6	151688503	ESR1	rs2941740	151684876	151763727	9.06e-18	92	1	0	0	0	91	chr6:151684876:A:G,chr6:151687645:C:T,chr6:151687789:C:T,chr6:151687847:G:A,chr6:151689119:A:G,chr6:151689399:T:C,chr6:151689426:C:T,chr6:151691604:A:T,chr6:151691821:A:G,chr6:151691853:A:G,chr6:151692088:G:T,chr6:151692613:C:T,chr6:151692625:G:T,chr6:151693669:G:C,chr6:151695234:A:T,chr6:151695668:C:T,chr6:151696556:T:G,chr6:151696823:C:G,chr6:151702056:G:A,chr6:151703280:A:G,chr6:151703850:T:C,…
W	EUR	6	151711782	ESR1	rs1101081	151711782	151730908	5.07e-11	7	0	0	1	0	6	chr6:151723737:A:T,chr6:151726422:G:C,chr6:151726618:A:G,chr6:151726887:C:T,chr6:151729388:G:C,chr6:151730719:G:A,chr6:151730908:G:A
W	EUR	6	151734843	ESR1	rs6904031	151719742	151751583	4.05e-17	4	0	0	0	0	4	chr6:151719742:T:G,chr6:151722972:T:C,chr6:151749793:G:A,chr6:151751583:G:T
W	EUR	6	151774694	ESR1	rs2504066	151713252	151782657	3.42e-08	14	5	1	2	0	6	chr6:151713252:G:A,chr6:151733239:C:T,chr6:151756388:C:G,chr6:151759600:G:T,chr6:151759874:C:T,chr6:151761234:T:C,chr6:151768633:A:C,chr6:151769572:A:G,chr6:151771503:T:A,chr6:151771614:A:G,chr6:151774032:G:A,chr6:151774852:G:A,chr6:151778299:G:T,chr6:151782657:C:T
W	EUR	6	152081905	ESR1	rs192794273	151693125	152688083	2.43e-17	7	0	0	0	0	7	chr6:151693125:T:C,chr6:151725226:A:G,chr6:151728707:C:G,chr6:151759387:C:A,chr6:151940169:G:A,chr6:152452016:A:T,chr6:152688083:C:A
W	EUR	6	152114619	ESR1	rs113766362	152101993	152155363	1.24e-11	29	0	0	1	0	28	chr6:152101993:T:C,chr6:152102770:T:A,chr6:152105298:G:T,chr6:152112857:G:A,chr6:152114508:G:A,chr6:152119933:G:T,chr6:152120708:C:T,chr6:152123926:G:T,chr6:152128660:G:A,chr6:152128716:C:T,chr6:152128859:G:T,chr6:152130070:G:A,chr6:152130511:C:T,chr6:152131971:G:T,chr6:152134618:T:C,chr6:152137855:G:A,chr6:152140568:C:T,chr6:152149158:T:C,chr6:152149617:C:A,chr6:152149912:T:C,chr6:152150453:C:T,…
W	EUR	6	152192561	SYNE1	rs2813530	152171202	152202415	8.26e-09	55	6	2	8	2	37	chr6:152171202:C:A,chr6:152171382:G:T,chr6:152171601:G:C,chr6:152172155:T:C,chr6:152172330:T:C,chr6:152172402:T:G,chr6:152174708:G:A,chr6:152177471:C:T,chr6:152177938:T:C,chr6:152181216:T:C,chr6:152183739:T:A,chr6:152183921:G:T,chr6:152185599:T:C,chr6:152185690:T:G,chr6:152185981:A:G,chr6:152187874:C:A,chr6:152188172:A:T,chr6:152188374:C:G,chr6:152188687:G:A,chr6:152188730:G:A,chr6:152188819:A:G,…
W	EUR	6	152202601	SYNE1	rs77483076	152188030	152214208	2.69e-18	7	0	0	0	0	7	chr6:152188030:T:C,chr6:152194901:T:C,chr6:152197884:G:A,chr6:152209472:G:A,chr6:152210675:G:A,chr6:152212404:T:C,chr6:152214208:A:G
W	EUR	6	152211087	SYNE1	rs2763028	152205044	152215390	4.34e-08	5	1	0	0	4	0	chr6:152205044:T:C,chr6:152207622:G:A,chr6:152208588:G:A,chr6:152215239:A:T,chr6:152215390:A:G
W	EUR	6	152232583	SYNE1	rs17803970	152217850	152285542	7.82e-23	20	0	0	0	0	20	chr6:152217850:T:C,chr6:152218896:T:C,chr6:152219222:T:C,chr6:152222814:C:T,chr6:152226892:T:G,chr6:152226916:C:A,chr6:152231032:G:A,chr6:152233977:C:T,chr6:152243617:G:A,chr6:152243859:G:C,chr6:152245912:T:C,chr6:152246848:A:G,chr6:152249139:A:G,chr6:152264078:G:A,chr6:152270980:C:G,chr6:152271966:C:T,chr6:152277329:G:A,chr6:152281283:C:T,chr6:152285439:G:A,chr6:152285542:G:A
W	EUR	6	152237488	SYNE1	rs6927162	152217672	152237488	4.6e-13	25	4	7	3	3	8	chr6:152217672:C:T,chr6:152217919:C:A,chr6:152218046:T:C,chr6:152218064:G:A,chr6:152218215:C:G,chr6:152219333:A:T,chr6:152219508:C:A,chr6:152220041:A:G,chr6:152220500:G:A,chr6:152221099:G:T,chr6:152221413:A:G,chr6:152221733:T:G,chr6:152221827:T:C,chr6:152222106:G:A,chr6:152222280:T:G,chr6:152223496:G:A,chr6:152225190:G:A,chr6:152225255:C:T,chr6:152225301:A:G,chr6:152225605:A:G,chr6:152226016:C:T,…
W	EUR	6	152239781	SYNE1	rs9479275	152223236	152283709	2.02e-19	8	0	1	1	0	6	chr6:152223236:G:A,chr6:152223349:C:T,chr6:152228501:G:T,chr6:152234298:G:C,chr6:152234313:A:G,chr6:152271967:A:G,chr6:152282489:G:C,chr6:152283709:G:A
W	EUR	6	152240213	SYNE1	rs9371245	152217019	152267353	8.19e-15	24	5	15	2	1	1	chr6:152217019:C:T,chr6:152217282:G:A,chr6:152227685:C:A,chr6:152228087:G:A,chr6:152229115:G:A,chr6:152229348:T:C,chr6:152229407:T:C,chr6:152229712:T:C,chr6:152229786:G:C,chr6:152229928:A:T,chr6:152231240:A:G,chr6:152232770:G:C,chr6:152235148:T:C,chr6:152235490:T:C,chr6:152238254:A:C,chr6:152238470:G:A,chr6:152238668:A:G,chr6:152239343:A:C,chr6:152239910:T:C,chr6:152240602:A:G,chr6:152244970:G:A,…
W	EUR	6	152241136	SYNE1	rs58415480	152224036	152363450	4.29e-39	39	0	0	0	0	39	chr6:152224036:A:T,chr6:152224730:T:C,chr6:152228174:C:T,chr6:152232879:C:G,chr6:152233261:C:T,chr6:152233602:G:A,chr6:152235123:T:C,chr6:152235391:C:T,chr6:152235465:G:A,chr6:152237062:G:A,chr6:152237417:C:T,chr6:152241830:G:A,chr6:152241832:T:C,chr6:152289837:A:G,chr6:152295038:G:A,chr6:152306818:A:G,chr6:152307964:C:T,chr6:152309045:G:A,chr6:152310130:A:G,chr6:152328832:G:C,chr6:152332002:C:T,…
W	EUR	6	152271616	SYNE1	rs633891	152243010	152302397	4.59e-19	30	3	0	1	0	26	chr6:152243010:G:A,chr6:152244762:C:T,chr6:152247587:A:G,chr6:152247855:C:A,chr6:152248031:T:C,chr6:152249280:A:G,chr6:152249905:A:G,chr6:152250071:T:G,chr6:152250080:A:C,chr6:152251214:T:G,chr6:152253365:C:T,chr6:152254038:A:G,chr6:152254569:T:G,chr6:152255456:G:A,chr6:152257563:C:A,chr6:152257960:G:A,chr6:152258167:A:C,chr6:152258414:T:C,chr6:152258680:C:T,chr6:152258937:G:A,chr6:152263876:T:A,…
W	EUR	6	152291339	SYNE1	rs73007778	152291339	152305328	3.48e-13	7	0	0	1	0	6	chr6:152293038:C:T,chr6:152299647:T:C,chr6:152299738:A:G,chr6:152300259:C:T,chr6:152303832:A:C,chr6:152304828:G:A,chr6:152305328:C:A
W	EUR	6	152305554	SYNE1	rs9383984	152305554	152308482	4.91e-13	1	0	0	0	0	1	chr6:152308482:C:T
W	EUR	6	152311783	SYNE1	rs1962704	152311779	152311783	2.03e-13	1	1	0	0	0	0	chr6:152311779:T:A
W	EUR	6	152317104	SYNE1	rs931423	152314488	152362278	6.33e-15	26	10	0	0	0	16	chr6:152314488:A:C,chr6:152314875:T:C,chr6:152314906:G:A,chr6:152314918:T:C,chr6:152314919:G:C,chr6:152314920:A:T,chr6:152314921:T:C,chr6:152314923:A:T,chr6:152314925:G:A,chr6:152314926:A:T,chr6:152314927:G:C,chr6:152314940:T:C,chr6:152317074:G:A,chr6:152317277:G:A,chr6:152319390:C:T,chr6:152320305:G:C,chr6:152320471:T:G,chr6:152322230:C:T,chr6:152322735:C:T,chr6:152322830:C:T,chr6:152322976:C:T,…
W	EUR	6	152327792	SYNE1	rs6557213	152324267	152340113	7.38e-09	11	0	0	0	3	8	chr6:152324267:C:T,chr6:152325558:T:C,chr6:152326546:T:A,chr6:152330899:T:A,chr6:152331902:T:C,chr6:152333659:T:G,chr6:152337081:A:G,chr6:152337839:C:T,chr6:152339175:A:G,chr6:152339965:G:A,chr6:152340113:G:C
W	EUR	6	152349854	SYNE1	rs4870098	152335972	152376571	1.68e-18	63	5	0	0	8	50	chr6:152335972:C:G,chr6:152337750:T:C,chr6:152338117:C:T,chr6:152340035:T:C,chr6:152340452:C:G,chr6:152340671:A:G,chr6:152340992:T:G,chr6:152342141:G:A,chr6:152342794:C:A,chr6:152343052:G:A,chr6:152343547:G:A,chr6:152343561:C:T,chr6:152343598:G:A,chr6:152344126:A:C,chr6:152344493:T:C,chr6:152344656:A:T,chr6:152346667:G:A,chr6:152346796:A:T,chr6:152347493:G:C,chr6:152347780:A:T,chr6:152347981:T:C,…
W	EUR	6	152363227	SYNE1	rs62426386	152345749	152377563	8.21e-09	9	1	0	0	2	6	chr6:152345749:G:T,chr6:152346034:T:C,chr6:152361656:A:G,chr6:152361973:G:A,chr6:152362838:C:A,chr6:152363220:T:C,chr6:152366802:A:T,chr6:152373728:G:A,chr6:152377563:C:T
W	EUR	6	152549567	SYNE1	rs13216059	152382266	152551443	3.3e-19	32	3	0	0	0	29	chr6:152382266:G:A,chr6:152390610:C:T,chr6:152390998:C:A,chr6:152391167:C:T,chr6:152443555:T:C,chr6:152465828:C:T,chr6:152505492:C:T,chr6:152515525:G:A,chr6:152515586:C:T,chr6:152516106:T:C,chr6:152519442:C:T,chr6:152526200:G:A,chr6:152527148:G:A,chr6:152527579:G:A,chr6:152528240:C:A,chr6:152528353:G:A,chr6:152534202:G:A,chr6:152536339:A:G,chr6:152536433:A:T,chr6:152536715:T:C,chr6:152536965:A:G,…
W	EUR	6	152577842	SYNE1	rs12190943	152559237	152748586	4.21e-16	6	1	0	0	1	4	chr6:152559237:A:G,chr6:152620342:T:C,chr6:152642110:G:A,chr6:152709024:C:A,chr6:152733172:C:T,chr6:152748586:A:G
W	EUR	6	152638656	SYNE1/LOC105378061	rs185818970	152638656	153636158	1.4e-15	6	6	0	0	0	0	chr6:153438662:A:G,chr6:153442714:T:A,chr6:153452135:T:C,chr6:153452278:A:T,chr6:153548834:C:T,chr6:153636158:G:A
W	EUR	6	152755821	VIP	rs12201140	152746792	152772823	4.45e-08	12	0	0	0	1	11	chr6:152746792:G:A,chr6:152747831:T:C,chr6:152748207:A:C,chr6:152748221:A:G,chr6:152749068:C:G,chr6:152749651:C:A,chr6:152751561:T:C,chr6:152753064:A:T,chr6:152753187:C:T,chr6:152753941:T:C,chr6:152765101:A:T,chr6:152772823:T:A
W	EUR	6	152861811	LINC02840	rs117549223	152817878	153049922	5.93e-10	9	0	1	2	1	5	chr6:152817878:T:C,chr6:152889800:C:A,chr6:152904100:C:T,chr6:152907910:T:C,chr6:152912802:T:G,chr6:152939985:A:T,chr6:153030624:G:A,chr6:153048395:C:A,chr6:153049922:T:C
W	EUR	6	153381409	LOC105378066	rs188913933	153356054	153901396	1.75e-09	6	0	0	0	0	6	chr6:153356054:A:G,chr6:153381410:C:T,chr6:153490827:G:C,chr6:153789858:G:A,chr6:153897136:C:G,chr6:153901396:C:T
W	EUR	7	25862418	LOC100506236/LOC110121115	rs12700668	25662657	25868590	2.22e-08	57	14	1	2	0	40	chr7:25662657:C:A,chr7:25664745:G:T,chr7:25796942:G:A,chr7:25798153:C:G,chr7:25801044:A:C,chr7:25803016:A:G,chr7:25803435:A:G,chr7:25814531:C:T,chr7:25816496:T:C,chr7:25821192:G:A,chr7:25821518:C:T,chr7:25821799:C:G,chr7:25822019:G:A,chr7:25823113:G:T,chr7:25824011:T:A,chr7:25824097:G:A,chr7:25824413:T:C,chr7:25825038:C:T,chr7:25825162:A:C,chr7:25825600:C:T,chr7:25825741:A:G,chr7:25825760:G:A,chr…
W	EUR	7	46631145	HMGN1P19	rs993183	46630950	46663062	2.88e-08	45	1	0	9	7	28	chr7:46630950:A:G,chr7:46631525:G:T,chr7:46631821:A:C,chr7:46632024:G:T,chr7:46634176:C:T,chr7:46634184:G:A,chr7:46634321:T:G,chr7:46635603:G:T,chr7:46635608:G:A,chr7:46637391:A:C,chr7:46637772:A:G,chr7:46638199:A:G,chr7:46638657:G:A,chr7:46639288:G:A,chr7:46640460:C:G,chr7:46640564:A:T,chr7:46640725:C:A,chr7:46642539:G:T,chr7:46643352:G:A,chr7:46643814:A:G,chr7:46643817:C:G,chr7:46644733:C:T,chr…
W	EUR	8	25423284	GNRH1	rs6185	25385697	25541586	5.09e-09	15	1	0	1	2	11	chr8:25385697:A:G,chr8:25387916:G:A,chr8:25389665:G:A,chr8:25391099:G:A,chr8:25397501:A:C,chr8:25405778:T:G,chr8:25409587:G:A,chr8:25411586:C:A,chr8:25441223:C:G,chr8:25453753:G:A,chr8:25463078:T:C,chr8:25464329:T:A,chr8:25485213:G:T,chr8:25532115:G:A,chr8:25541586:C:T
W	EUR	8	74388363	GDAP1	rs13264285	74340773	74514280	2.25e-12	139	7	0	0	0	132	chr8:74340773:A:T,chr8:74342225:C:T,chr8:74345373:A:G,chr8:74346788:G:A,chr8:74347901:G:A,chr8:74348230:A:T,chr8:74348232:A:T,chr8:74349113:C:T,chr8:74349626:A:G,chr8:74350822:C:T,chr8:74350917:C:A,chr8:74351041:A:T,chr8:74353365:C:T,chr8:74353687:T:C,chr8:74353954:A:G,chr8:74354444:A:G,chr8:74354477:A:G,chr8:74354679:T:C,chr8:74355383:A:G,chr8:74355481:C:A,chr8:74356000:C:T,chr8:74357133:A:C,chr…
W	EUR	9	22144277	CDKN2B-AS1	rs2151284	22141035	22205247	1.26e-10	11	0	0	2	2	7	chr9:22141035:A:G,chr9:22143134:A:G,chr9:22148703:A:G,chr9:22174104:C:T,chr9:22175941:G:C,chr9:22180265:C:A,chr9:22180330:C:T,chr9:22181188:G:A,chr9:22194536:T:C,chr9:22202908:G:C,chr9:22205247:A:G
W	EUR	9	22158308	CDKN2B-AS1	rs117914842	22147126	22199475	1.32e-09	8	1	0	0	0	7	chr9:22147126:T:C,chr9:22159900:G:A,chr9:22168215:C:T,chr9:22170927:G:T,chr9:22170928:T:C,chr9:22191863:G:T,chr9:22197351:C:T,chr9:22199475:G:C
W	EUR	9	22171485	CDKN2B-AS1/DMRTA1	rs2779747	22141270	22196973	2.74e-19	91	7	0	1	14	69	chr9:22141270:C:T,chr9:22141553:T:G,chr9:22141791:A:G,chr9:22141876:T:C,chr9:22141895:T:C,chr9:22142957:C:A,chr9:22143294:T:A,chr9:22143378:T:C,chr9:22144256:T:A,chr9:22144306:C:A,chr9:22144317:T:C,chr9:22145740:A:T,chr9:22148056:C:T,chr9:22150262:T:C,chr9:22150793:C:T,chr9:22152402:C:T,chr9:22152581:G:A,chr9:22152644:G:T,chr9:22153266:T:C,chr9:22153361:G:A,chr9:22153715:T:A,chr9:22154010:C:T,chr…
W	EUR	9	133279294	LOC112637023/LCN1P2	rs495828	133268896	133402020	2.89e-08	16	2	0	2	4	8	chr9:133268896:T:C,chr9:133269992:C:A,chr9:133273682:T:A,chr9:133274295:A:T,chr9:133276354:T:C,chr9:133278431:C:T,chr9:133278537:C:T,chr9:133278724:T:C,chr9:133278860:C:T,chr9:133279427:C:T,chr9:133281560:G:A,chr9:133296748:C:G,chr9:133317963:C:T,chr9:133370796:C:A,chr9:133372523:G:C,chr9:133402020:C:T
W	EUR	10	88391080	RNLS	rs796945	88294511	88536710	2.35e-13	180	4	0	0	7	169	chr10:88294511:G:A,chr10:88295142:T:C,chr10:88306479:C:A,chr10:88307548:G:A,chr10:88309190:C:T,chr10:88312595:T:C,chr10:88314248:A:G,chr10:88314383:G:A,chr10:88314388:A:G,chr10:88316086:A:G,chr10:88316958:T:C,chr10:88319957:G:T,chr10:88322643:C:T,chr10:88322989:C:A,chr10:88323430:G:A,chr10:88323588:C:T,chr10:88327082:A:G,chr10:88327627:A:G,chr10:88327651:A:G,chr10:88327655:G:C,chr10:88329669:T:C,…
W	EUR	11	30180243	ARL14EP-DT	rs7113525	30038818	30186969	6.63e-11	186	7	2	0	4	173	chr11:30038818:A:G,chr11:30124183:C:T,chr11:30124683:T:C,chr11:30124860:C:T,chr11:30125738:C:A,chr11:30125968:T:C,chr11:30126015:C:T,chr11:30127324:T:C,chr11:30128055:C:G,chr11:30128453:G:A,chr11:30129570:C:T,chr11:30129897:C:T,chr11:30130531:A:G,chr11:30131047:G:A,chr11:30131801:A:C,chr11:30132490:T:C,chr11:30132860:C:G,chr11:30132930:A:G,chr11:30133062:C:T,chr11:30133383:T:C,chr11:30133539:T:C,…
W	EUR	11	30204809	ARL14EP-DT	rs11031005	30104072	30374324	1.84e-32	69	0	0	0	0	69	chr11:30104072:G:C,chr11:30193714:T:A,chr11:30194459:C:T,chr11:30202314:A:C,chr11:30202319:A:G,chr11:30204981:G:A,chr11:30206376:T:A,chr11:30206717:T:C,chr11:30207687:A:C,chr11:30218631:C:A,chr11:30220740:T:C,chr11:30230805:G:T,chr11:30240421:A:G,chr11:30274508:T:C,chr11:30284128:C:T,chr11:30284892:C:T,chr11:30285103:A:T,chr11:30286442:A:G,chr11:30286612:C:T,chr11:30288280:C:T,chr11:30288322:C:T,…
W	EUR	11	30213235	ARL14EP-DT	rs540948	30193166	30410629	8.39e-11	214	37	2	16	1	158	chr11:30193166:A:G,chr11:30195456:T:A,chr11:30195956:T:C,chr11:30199192:T:A,chr11:30201090:C:T,chr11:30202027:A:G,chr11:30203623:C:G,chr11:30204739:C:T,chr11:30205987:T:C,chr11:30208669:A:G,chr11:30210834:T:C,chr11:30211068:A:G,chr11:30211614:A:G,chr11:30212847:T:C,chr11:30212885:A:G,chr11:30213059:T:C,chr11:30213156:A:G,chr11:30213950:A:G,chr11:30214997:C:T,chr11:30215971:T:C,chr11:30217285:A:T,…
W	EUR	12	94942561	LOC105369915/NDUFA12	rs11831109	94871236	95113055	2.85e-08	22	3	4	1	2	12	chr12:94871236:C:T,chr12:94909430:G:A,chr12:94916624:C:G,chr12:94917433:C:A,chr12:94929221:A:G,chr12:94932290:G:A,chr12:94934554:G:A,chr12:94935362:A:T,chr12:94936058:C:T,chr12:94937424:C:T,chr12:94940835:C:T,chr12:94941914:C:T,chr12:94944113:G:A,chr12:94944722:T:C,chr12:94945922:C:T,chr12:94951398:C:T,chr12:94951927:T:C,chr12:94959085:G:A,chr12:94965669:C:T,chr12:95076489:G:A,chr12:95086812:C:T,…
W	EUR	12	94953866	LOC105369915/NDUFA12	rs10859800	94907773	95265582	8.17e-09	66	10	8	18	3	27	chr12:94907773:G:A,chr12:94913022:G:C,chr12:94919862:C:G,chr12:94922194:G:T,chr12:94935747:T:C,chr12:94946683:G:A,chr12:94954402:G:A,chr12:94954450:C:G,chr12:94954455:G:A,chr12:94955922:C:T,chr12:94967205:C:T,chr12:94967688:A:T,chr12:94967834:C:T,chr12:94967920:C:A,chr12:94968791:T:C,chr12:94969242:G:C,chr12:94969267:T:C,chr12:94972023:T:C,chr12:94972060:C:T,chr12:94974463:C:A,chr12:94976140:G:A,…
W	EUR	12	95132236	FGD6	rs9804833	94960462	95312785	4.29e-13	210	16	16	19	8	151	chr12:94960462:G:A,chr12:94961205:G:A,chr12:94970233:C:T,chr12:94972782:A:C,chr12:94972829:T:C,chr12:94974387:A:G,chr12:94975639:T:A,chr12:94975947:G:A,chr12:94976669:T:C,chr12:94977482:A:C,chr12:94977622:G:C,chr12:94979999:G:A,chr12:94980484:C:T,chr12:94980739:T:C,chr12:94981341:C:T,chr12:94981692:A:G,chr12:94985362:C:T,chr12:94986030:A:G,chr12:94986644:C:A,chr12:94987312:A:G,chr12:94987519:G:A,…
W	EUR	12	95189432	FGD6	rs11613113	95011357	95300167	3.82e-08	31	5	5	0	1	20	chr12:95011357:T:C,chr12:95040676:C:T,chr12:95063758:A:G,chr12:95087725:C:T,chr12:95141728:T:C,chr12:95148867:T:C,chr12:95148897:T:C,chr12:95148927:T:C,chr12:95164366:T:C,chr12:95164703:T:A,chr12:95166514:G:A,chr12:95175619:C:T,chr12:95177017:G:A,chr12:95186305:G:C,chr12:95186519:A:G,chr12:95198596:C:T,chr12:95206622:G:C,chr12:95212777:C:G,chr12:95215916:C:T,chr12:95227945:G:A,chr12:95233368:G:A,…
W	EUR	12	95216444	FGD6	rs7310833	94943252	95323721	1.19e-18	169	3	1	2	0	163	chr12:94943252:T:C,chr12:94946573:T:C,chr12:94948833:T:C,chr12:94967223:T:A,chr12:94967275:A:G,chr12:95010408:G:A,chr12:95021426:A:C,chr12:95032218:T:A,chr12:95035656:G:A,chr12:95040340:T:A,chr12:95043187:G:A,chr12:95044504:C:G,chr12:95049713:A:G,chr12:95052985:T:C,chr12:95058752:C:G,chr12:95063955:G:A,chr12:95067581:T:A,chr12:95076368:A:C,chr12:95078313:G:A,chr12:95083404:A:G,chr12:95083498:A:G,…
W	EUR	12	95300771	VEZT	rs1046007	95007537	95316533	1.42e-10	79	78	1	0	0	0	chr12:95007537:A:G,chr12:95008477:T:G,chr12:95010448:C:A,chr12:95019010:G:A,chr12:95027497:G:A,chr12:95028606:A:C,chr12:95029824:T:C,chr12:95032783:C:T,chr12:95036597:G:A,chr12:95038573:C:T,chr12:95039001:A:C,chr12:95039082:C:A,chr12:95040291:T:G,chr12:95043711:C:G,chr12:95047554:C:T,chr12:95047647:C:T,chr12:95047758:A:G,chr12:95048192:C:T,chr12:95048419:T:C,chr12:95049399:T:C,chr12:95051272:T:A,…
W	EUR	12	102349438	LINC02456	rs1533686	102001094	102471274	1.53e-10	279	8	1	6	20	244	chr12:102001094:A:T,chr12:102005576:T:C,chr12:102005601:A:C,chr12:102007234:G:A,chr12:102007287:C:T,chr12:102010341:A:T,chr12:102010690:T:C,chr12:102011284:T:G,chr12:102013654:A:T,chr12:102014265:G:A,chr12:102014369:T:G,chr12:102015078:G:A,chr12:102015311:A:G,chr12:102015768:G:T,chr12:102018721:T:C,chr12:102020790:G:T,chr12:102021478:T:C,chr12:102023697:T:C,chr12:102023860:C:A,chr12:102024826:A:G…
W	EUR	12	114768515	TBX3-AS1	rs1566643	114749525	114781946	4.86e-08	22	6	7	7	2	0	chr12:114749525:C:T,chr12:114750278:G:A,chr12:114755373:C:T,chr12:114755389:T:C,chr12:114759891:C:G,chr12:114760587:G:A,chr12:114760687:C:G,chr12:114760932:T:C,chr12:114761070:G:T,chr12:114761210:G:T,chr12:114762792:T:C,chr12:114763631:G:A,chr12:114765814:C:T,chr12:114766626:G:T,chr12:114766652:C:T,chr12:114766723:G:C,chr12:114766919:G:A,chr12:114768147:G:T,chr12:114768903:C:G,chr12:114770374:C:T…
W	EUR	15	40061215	SRP14-DT	rs12441483	39991596	40091578	2.26e-08	77	3	7	7	9	51	chr15:39991596:T:G,chr15:39995589:G:A,chr15:40008242:T:G,chr15:40010042:T:C,chr15:40010240:A:G,chr15:40011641:A:G,chr15:40012206:A:C,chr15:40015574:G:A,chr15:40017503:T:A,chr15:40020940:C:T,chr15:40021872:G:C,chr15:40021990:A:G,chr15:40022766:G:C,chr15:40025407:G:A,chr15:40036091:A:G,chr15:40036772:A:G,chr15:40039498:A:G,chr15:40041154:C:G,chr15:40041268:A:G,chr15:40041456:G:A,chr15:40041590:A:G,…
W	EUR	17	48147546	SKAP1	rs7220922	48047829	48429392	4.43e-10	279	13	2	42	77	145	chr17:48047829:C:T,chr17:48048616:C:G,chr17:48050394:G:A,chr17:48050997:G:C,chr17:48051953:C:T,chr17:48051991:C:T,chr17:48052892:G:T,chr17:48055361:G:C,chr17:48055575:T:A,chr17:48061847:G:T,chr17:48062207:C:T,chr17:48062370:T:G,chr17:48062929:T:C,chr17:48063914:C:T,chr17:48063930:G:A,chr17:48065318:G:A,chr17:48066153:T:C,chr17:48067838:G:A,chr17:48068347:T:G,chr17:48069301:T:A,chr17:48069458:A:G,…
W	EUR	19	8679120	NFILZ	rs2164983	8667046	8708650	1.64e-08	33	1	1	0	4	27	chr19:8667046:G:A,chr19:8668682:G:A,chr19:8669329:C:T,chr19:8675909:G:A,chr19:8676116:T:C,chr19:8676789:G:A,chr19:8677078:C:T,chr19:8677083:C:T,chr19:8677131:C:T,chr19:8677192:C:T,chr19:8677438:C:T,chr19:8677808:G:A,chr19:8677915:T:G,chr19:8678357:T:C,chr19:8678537:A:C,chr19:8678830:G:C,chr19:8678969:C:T,chr19:8679223:C:T,chr19:8679402:A:C,chr19:8679457:C:T,chr19:8679458:A:G,chr19:8679648:A:C,chr…
W	EUR	19	29621450	POP4/LOC105372353	rs12983160	29597787	29621780	6.01e-09	31	0	0	3	8	20	chr19:29597787:G:C,chr19:29599092:G:A,chr19:29602308:A:G,chr19:29602624:G:T,chr19:29604100:A:G,chr19:29604909:A:C,chr19:29605656:T:C,chr19:29607146:A:T,chr19:29611949:A:G,chr19:29612641:T:G,chr19:29613291:A:G,chr19:29614542:T:C,chr19:29615062:G:T,chr19:29615752:G:A,chr19:29615868:T:A,chr19:29615869:C:T,chr19:29615984:T:C,chr19:29616515:T:C,chr19:29616714:C:T,chr19:29617578:C:T,chr19:29617964:G:T,…
W	EUR	20	32510762	NOL4L	rs293567	32103140	32602191	2.09e-08	373	24	17	133	97	102	chr20:32103140:G:T,chr20:32104119:G:A,chr20:32104232:A:G,chr20:32107342:T:G,chr20:32114341:T:C,chr20:32115793:C:T,chr20:32115807:C:T,chr20:32118637:G:T,chr20:32121088:T:A,chr20:32121266:G:A,chr20:32122100:C:T,chr20:32122499:G:A,chr20:32123039:T:C,chr20:32123712:A:C,chr20:32124203:A:G,chr20:32124462:T:C,chr20:32124636:G:T,chr20:32126625:A:G,chr20:32127247:G:A,chr20:32127894:G:C,chr20:32127959:G:A,…
W	EUR	20	41569590	CHD6	rs4239692	40992207	41641499	1.35e-08	321	7	1	14	36	263	chr20:40992207:T:A,chr20:41000894:T:C,chr20:41000898:A:G,chr20:41001295:G:A,chr20:41001584:C:T,chr20:41002557:A:C,chr20:41003031:A:G,chr20:41004523:T:C,chr20:41004963:C:T,chr20:41006064:G:A,chr20:41008232:C:G,chr20:41011420:G:A,chr20:41011928:C:A,chr20:41012833:G:A,chr20:41013308:C:T,chr20:41016215:C:T,chr20:41016645:T:C,chr20:41023252:C:G,chr20:41026378:C:G,chr20:41031472:A:G,chr20:41032444:A:G,…
W	META	1	22027552	LINC00339	rs41307810	22027552	22130063	1.39e-10	1	1	0	0	0	0	chr1:22130063:T:C
W	META	1	22058220	CDC42	rs12035094	22019846	22058220	4.77e-11	1	0	0	0	0	1	chr1:22019846:C:G
W	META	1	22139327	WNT4	rs61768001	22020903	22166394	2.56e-40	100	2	0	0	1	97	chr1:22020903:A:G,chr1:22021916:G:A,chr1:22022094:A:C,chr1:22022893:C:T,chr1:22023122:A:G,chr1:22024341:C:T,chr1:22025547:T:G,chr1:22026643:G:A,chr1:22028045:C:A,chr1:22029485:G:A,chr1:22030736:A:T,chr1:22031964:C:T,chr1:22032080:C:T,chr1:22032102:G:A,chr1:22032254:C:T,chr1:22032296:G:T,chr1:22032343:C:T,chr1:22032413:C:T,chr1:22032589:C:G,chr1:22032899:G:A,chr1:22033205:C:T,chr1:22033346:T:C,chr…
W	META	1	22148932	LOC105376845	rs7529389	22026998	22151000	5.88e-11	17	0	0	0	3	14	chr1:22026998:C:T,chr1:22034321:A:G,chr1:22102208:G:A,chr1:22104599:T:C,chr1:22109230:G:C,chr1:22117394:G:T,chr1:22119498:C:T,chr1:22122832:G:A,chr1:22126221:C:T,chr1:22128649:G:A,chr1:22132677:G:A,chr1:22133261:A:G,chr1:22143622:A:G,chr1:22147165:T:C,chr1:22147298:C:T,chr1:22149156:T:C,chr1:22151000:C:T
W	META	1	22153726	LOC105376845	rs10917162	22153666	22158645	1.09e-16	4	1	0	0	0	3	chr1:22153666:A:G,chr1:22153748:T:C,chr1:22153819:G:A,chr1:22158645:G:A
W	META	1	22159378	LOC105376845/LOC105376850	rs16826658	22155553	22181487	2.94e-22	13	3	0	0	1	9	chr1:22155553:A:G,chr1:22155554:G:A,chr1:22157091:G:A,chr1:22157137:C:T,chr1:22158082:T:C,chr1:22159184:A:G,chr1:22159904:C:T,chr1:22160543:C:T,chr1:22175135:T:C,chr1:22177598:G:A,chr1:22179944:A:G,chr1:22181408:C:T,chr1:22181487:C:T
W	META	1	22166245	LOC105376850	rs2206301	22158974	22168722	4.41e-12	6	0	0	1	1	4	chr1:22158974:A:G,chr1:22164872:C:T,chr1:22165264:G:A,chr1:22166029:T:C,chr1:22167332:G:C,chr1:22168722:G:A
W	META	1	22175353	LOC105376850	rs742356	22168768	22261000	9.7e-11	66	0	2	7	12	45	chr1:22168768:G:C,chr1:22171881:C:T,chr1:22172272:C:A,chr1:22172331:C:G,chr1:22177057:A:T,chr1:22178072:C:G,chr1:22179116:A:G,chr1:22181191:C:T,chr1:22181456:C:T,chr1:22183556:G:T,chr1:22185101:T:C,chr1:22186597:G:C,chr1:22187397:A:T,chr1:22188183:A:G,chr1:22192828:A:G,chr1:22195560:C:T,chr1:22195569:G:A,chr1:22196434:T:C,chr1:22199834:G:A,chr1:22207749:C:T,chr1:22213320:T:G,chr1:22213624:C:T,chr…
W	META	1	115283491	NGF-AS1	rs12075799	115265930	115287322	1.02e-08	23	0	0	0	5	18	chr1:115265930:C:A,chr1:115267227:C:T,chr1:115269758:G:A,chr1:115270083:G:T,chr1:115270548:C:T,chr1:115271144:C:G,chr1:115271316:G:T,chr1:115271862:T:C,chr1:115271891:T:C,chr1:115271928:T:G,chr1:115272291:C:T,chr1:115273844:G:T,chr1:115274600:G:T,chr1:115276158:G:T,chr1:115277977:C:T,chr1:115278464:C:A,chr1:115279844:T:A,chr1:115280766:A:G,chr1:115281777:G:A,chr1:115281894:T:C,chr1:115282037:T:C,…
W	META	1	169498416	LOC120893165/F5	rs1894692	169121510	169764425	6.59e-11	9	2	0	0	0	7	chr1:169121510:T:C,chr1:169191220:C:T,chr1:169238941:T:C,chr1:169247174:G:C,chr1:169355555:C:T,chr1:169465789:T:C,chr1:169549811:C:T,chr1:169689987:C:T,chr1:169764425:A:G
W	META	1	172163386	DNM3	rs12561946	172104148	172207853	4.61e-09	67	4	1	14	16	32	chr1:172104148:A:G,chr1:172117886:G:A,chr1:172126086:C:T,chr1:172126225:T:C,chr1:172126301:C:A,chr1:172126504:T:C,chr1:172129996:C:T,chr1:172143814:C:T,chr1:172147658:A:G,chr1:172148540:A:G,chr1:172150419:T:C,chr1:172152719:G:A,chr1:172152961:C:T,chr1:172153669:C:G,chr1:172155710:C:G,chr1:172155852:A:G,chr1:172157026:A:G,chr1:172157365:T:C,chr1:172157821:A:G,chr1:172158021:A:C,chr1:172158806:G:A,…
W	META	2	11519874	GREB1	rs13432124	11514406	11520489	4.71e-13	15	3	0	0	0	12	chr2:11514406:C:T,chr2:11514462:T:C,chr2:11514748:C:T,chr2:11515058:A:G,chr2:11515133:T:C,chr2:11515361:G:T,chr2:11515498:T:C,chr2:11515558:G:T,chr2:11516184:A:G,chr2:11516381:C:T,chr2:11516782:A:G,chr2:11517427:G:C,chr2:11517874:C:T,chr2:11519075:T:C,chr2:11520489:C:T
W	META	2	11521014	GREB1	rs10929751	11500074	11521014	6.52e-11	9	8	1	0	0	0	chr2:11500074:T:C,chr2:11501727:G:T,chr2:11502131:A:G,chr2:11506766:G:A,chr2:11509023:C:T,chr2:11511181:T:C,chr2:11512669:G:T,chr2:11514987:T:C,chr2:11517056:T:C
W	META	2	11533908	GREB1	rs11684917	11518846	11533908	2.14e-14	2	0	0	0	0	2	chr2:11518846:C:T,chr2:11520829:G:C
W	META	2	11534169	GREB1	rs11685032	11490247	11578732	1.42e-18	58	5	1	4	2	46	chr2:11490247:G:A,chr2:11518445:C:T,chr2:11518519:G:A,chr2:11522052:T:C,chr2:11523212:A:T,chr2:11523294:T:C,chr2:11524223:T:C,chr2:11526213:T:G,chr2:11527501:A:G,chr2:11528467:C:T,chr2:11530179:A:T,chr2:11535346:C:T,chr2:11535463:A:G,chr2:11535939:A:G,chr2:11536185:T:A,chr2:11537323:A:G,chr2:11537728:A:G,chr2:11538696:T:C,chr2:11538797:T:C,chr2:11538804:C:A,chr2:11540277:T:C,chr2:11540917:T:G,chr…
W	META	2	11575416	GREB1	rs13428862	11553911	11593008	2.95e-11	15	0	0	0	0	15	chr2:11553911:T:C,chr2:11555034:A:G,chr2:11555930:G:C,chr2:11556680:C:T,chr2:11559444:T:A,chr2:11564158:G:A,chr2:11565598:A:G,chr2:11566766:C:G,chr2:11567283:T:C,chr2:11567345:G:A,chr2:11570575:A:G,chr2:11571096:A:C,chr2:11571737:G:A,chr2:11571962:G:C,chr2:11593008:C:G
W	META	2	11582984	GREB1	rs16857668	11570590	11611135	1.69e-22	44	1	0	0	0	43	chr2:11570590:G:A,chr2:11576793:T:A,chr2:11577303:G:A,chr2:11578465:T:C,chr2:11581409:T:G,chr2:11581886:C:G,chr2:11581956:T:C,chr2:11581976:T:A,chr2:11582342:G:A,chr2:11582449:G:A,chr2:11582895:T:C,chr2:11583732:G:A,chr2:11584349:G:A,chr2:11584454:G:T,chr2:11584558:G:A,chr2:11584923:C:T,chr2:11585115:G:A,chr2:11586961:G:T,chr2:11587381:A:G,chr2:11587862:C:G,chr2:11587954:G:A,chr2:11587963:C:T,chr…
W	META	2	11605877	GREB1	rs34532804	11599666	11616960	2.06e-13	19	4	2	2	0	11	chr2:11599666:A:G,chr2:11604447:G:A,chr2:11606051:C:T,chr2:11606845:C:T,chr2:11607462:G:A,chr2:11607834:C:T,chr2:11607911:G:A,chr2:11608280:C:T,chr2:11609975:G:A,chr2:11611327:C:G,chr2:11611506:A:G,chr2:11611673:C:T,chr2:11612793:A:G,chr2:11613067:A:G,chr2:11613571:C:T,chr2:11616303:C:T,chr2:11616897:T:C,chr2:11616950:C:G,chr2:11616960:A:G
W	META	2	48967370	FSHR	rs2300441	48934640	49012022	7.46e-11	81	2	0	2	3	74	chr2:48934640:A:G,chr2:48934784:G:T,chr2:48935302:C:T,chr2:48935670:T:C,chr2:48937613:G:C,chr2:48937953:G:A,chr2:48938211:T:C,chr2:48938268:T:C,chr2:48938309:T:G,chr2:48939339:C:G,chr2:48939808:T:C,chr2:48944344:C:G,chr2:48944546:C:G,chr2:48944698:A:G,chr2:48944738:A:G,chr2:48947943:C:G,chr2:48947993:A:G,chr2:48948101:T:G,chr2:48948265:A:G,chr2:48949621:A:G,chr2:48951297:G:T,chr2:48952993:T:C,chr…
W	META	2	49011210	FSHR	rs4998052	48956270	49013593	1.82e-08	53	4	0	5	5	39	chr2:48956270:C:T,chr2:48958278:C:G,chr2:48958577:G:A,chr2:48959646:G:A,chr2:48972026:G:A,chr2:48973196:C:T,chr2:48973271:C:T,chr2:48973790:C:T,chr2:48973993:G:C,chr2:48974189:A:G,chr2:48978099:T:G,chr2:48980354:C:T,chr2:48981393:G:A,chr2:48982602:C:T,chr2:48985498:C:G,chr2:48985851:C:T,chr2:48988421:C:A,chr2:48989498:G:T,chr2:48989618:C:A,chr2:48998863:T:C,chr2:48999408:C:T,chr2:48999536:T:C,chr…
W	META	2	49014710	FSHR	rs6708637	49014710	49050684	1.95e-09	5	0	0	0	2	3	chr2:49018125:G:A,chr2:49018422:A:C,chr2:49018711:C:G,chr2:49018861:T:G,chr2:49050684:G:A
W	META	2	49092263	FSHR	rs11689334	49018269	49235189	2.8e-09	154	7	5	10	31	101	chr2:49018269:C:T,chr2:49021841:C:T,chr2:49022873:C:T,chr2:49032251:G:A,chr2:49032563:G:T,chr2:49033096:G:A,chr2:49035532:A:C,chr2:49038693:C:A,chr2:49039715:T:C,chr2:49041339:C:G,chr2:49041648:G:A,chr2:49043101:T:G,chr2:49043108:G:A,chr2:49045257:C:T,chr2:49045631:G:A,chr2:49047284:G:A,chr2:49049507:C:T,chr2:49049632:C:T,chr2:49052533:T:C,chr2:49054430:C:T,chr2:49055331:G:A,chr2:49057091:C:G,chr…
W	META	2	67641280	LOC105374786	rs1430788	67550026	67642640	1.02e-14	128	8	6	4	20	90	chr2:67550026:G:C,chr2:67552256:C:T,chr2:67552787:C:G,chr2:67553932:G:T,chr2:67554044:A:C,chr2:67555603:C:A,chr2:67556228:T:A,chr2:67560216:G:T,chr2:67563511:A:T,chr2:67567332:C:T,chr2:67567344:T:C,chr2:67567457:C:G,chr2:67568330:T:A,chr2:67569038:G:A,chr2:67569947:T:A,chr2:67572832:G:A,chr2:67573206:A:T,chr2:67574164:C:T,chr2:67574408:G:A,chr2:67575818:C:T,chr2:67576089:A:T,chr2:67576688:G:A,chr…
W	META	2	70875169	CD207/LINC01143	rs11374669	70803208	70913687	1.87e-08	21	9	0	0	4	8	chr2:70803208:G:T,chr2:70810750:T:C,chr2:70814144:G:A,chr2:70821705:G:A,chr2:70823171:T:G,chr2:70828199:C:G,chr2:70830955:G:T,chr2:70834378:G:C,chr2:70874948:T:A,chr2:70876465:T:G,chr2:70877646:T:C,chr2:70877895:A:G,chr2:70877994:T:G,chr2:70880019:A:G,chr2:70890364:T:C,chr2:70893806:C:T,chr2:70899817:G:C,chr2:70901366:C:G,chr2:70906324:A:G,chr2:70911207:A:G,chr2:70913687:A:G
W	META	2	217553717	DIRC3	rs67436597	217531737	217593388	3.68e-09	77	3	2	10	3	59	chr2:217531737:A:G,chr2:217532055:G:T,chr2:217532877:C:T,chr2:217533314:T:C,chr2:217533414:G:A,chr2:217534311:C:T,chr2:217535119:T:C,chr2:217535370:A:T,chr2:217535892:C:G,chr2:217536512:C:G,chr2:217536840:G:A,chr2:217537181:A:T,chr2:217538513:A:G,chr2:217539350:C:T,chr2:217539694:A:C,chr2:217540114:C:T,chr2:217540686:T:C,chr2:217542406:A:G,chr2:217543051:T:C,chr2:217544248:C:T,chr2:217545292:T:C,…
W	META	3	128159487	EEFSEC	rs2999047	127991295	128403196	3e-10	167	8	0	3	1	155	chr3:127991295:C:T,chr3:127991631:G:A,chr3:128007794:G:A,chr3:128007894:G:A,chr3:128008153:C:A,chr3:128008607:C:T,chr3:128011923:C:T,chr3:128012830:T:C,chr3:128014226:G:A,chr3:128014248:G:A,chr3:128028998:G:A,chr3:128036873:A:C,chr3:128037875:T:C,chr3:128038579:G:A,chr3:128040371:A:T,chr3:128040825:T:C,chr3:128044411:C:T,chr3:128050565:A:G,chr3:128052316:A:G,chr3:128054833:C:T,chr3:128056945:A:T,…
W	META	3	128272306	EEFSEC	rs2811413	127991754	128425914	4.38e-10	111	14	0	3	8	86	chr3:127991754:G:A,chr3:127993154:T:C,chr3:127994605:C:T,chr3:127995100:G:A,chr3:127995300:G:T,chr3:127995768:G:A,chr3:127996175:G:A,chr3:127996206:C:T,chr3:127996290:A:G,chr3:127997068:T:A,chr3:127997419:G:A,chr3:127997742:A:G,chr3:127998859:T:C,chr3:128000815:A:G,chr3:128001077:T:C,chr3:128001884:T:C,chr3:128001897:C:T,chr3:128002198:G:T,chr3:128002399:C:T,chr3:128002490:T:A,chr3:128002532:T:C,…
W	META	3	190807727	LOC100131685	rs9870207	190774846	190860185	1.82e-09	242	11	2	116	23	90	chr3:190774846:C:G,chr3:190784747:G:A,chr3:190788725:C:T,chr3:190792289:T:C,chr3:190794367:T:C,chr3:190794678:T:C,chr3:190796687:T:C,chr3:190796707:T:C,chr3:190796717:C:T,chr3:190796921:G:A,chr3:190797002:A:G,chr3:190797084:G:C,chr3:190797102:T:G,chr3:190797119:C:T,chr3:190797196:T:C,chr3:190797260:T:C,chr3:190797312:G:A,chr3:190797385:A:T,chr3:190797478:T:C,chr3:190797479:G:A,chr3:190797489:T:G,…
W	META	4	55142310	KDR	rs1903068	55124787	55161406	2.77e-25	69	0	0	0	0	69	chr4:55124787:G:C,chr4:55125858:G:A,chr4:55125972:C:T,chr4:55126199:G:A,chr4:55127301:T:C,chr4:55127748:C:T,chr4:55128043:T:C,chr4:55128059:T:A,chr4:55128099:A:T,chr4:55128147:T:G,chr4:55128894:C:T,chr4:55129261:C:T,chr4:55129402:C:A,chr4:55129480:T:G,chr4:55129812:T:C,chr4:55130545:C:T,chr4:55130678:C:T,chr4:55130736:G:A,chr4:55131034:A:G,chr4:55131173:A:G,chr4:55131455:C:T,chr4:55131747:T:C,chr…
W	META	4	55157896	KDR	rs17712245	55123508	55162258	1.77e-11	53	4	0	3	0	46	chr4:55123508:T:A,chr4:55124875:G:T,chr4:55125564:T:C,chr4:55125660:G:A,chr4:55125900:A:G,chr4:55125938:C:G,chr4:55129074:C:A,chr4:55129075:C:T,chr4:55129076:T:G,chr4:55136615:G:C,chr4:55136691:A:G,chr4:55140706:T:C,chr4:55141349:G:T,chr4:55145982:G:A,chr4:55148222:G:C,chr4:55151467:G:T,chr4:55151878:A:G,chr4:55152525:A:T,chr4:55153429:A:T,chr4:55154772:A:G,chr4:55156329:T:C,chr4:55156501:G:T,chr…
W	META	4	55162893	KDR	rs10050046	55162703	55162893	1.28e-08	2	0	0	0	0	2	chr4:55162703:G:C,chr4:55162734:G:A
W	META	4	55163307	KDR	rs3986292	55163307	55163307	1.95e-09	0	0	0	0	0	0	.
W	META	4	94697369	LOC110121104/BMPR1B-DT	rs72617704	94684736	94711819	9.74e-11	13	0	4	0	1	8	chr4:94684736:T:G,chr4:94684985:T:C,chr4:94690398:A:C,chr4:94690597:G:A,chr4:94690696:T:G,chr4:94691346:G:A,chr4:94692413:C:T,chr4:94693127:C:T,chr4:94699074:G:T,chr4:94700981:G:C,chr4:94704163:C:T,chr4:94707330:G:A,chr4:94711819:C:T
W	META	4	94714026	LOC110121104/BMPR1B-DT	rs2036754	94714026	94749944	1.45e-09	4	0	0	0	1	3	chr4:94714211:T:C,chr4:94721664:A:G,chr4:94732513:C:A,chr4:94749944:A:G
W	META	4	189245984	LOC124900838	rs72711129	189173784	189388235	2.4e-09	5	0	1	1	0	3	chr4:189173784:T:C,chr4:189182819:G:A,chr4:189335289:G:T,chr4:189368375:C:T,chr4:189388235:T:G
W	META	5	142783068	ARHGAP26	rs7728894	142697096	142790609	4.52e-08	61	55	2	2	0	2	chr5:142697096:C:T,chr5:142698298:T:C,chr5:142699661:T:A,chr5:142699717:G:A,chr5:142700025:G:A,chr5:142700458:C:T,chr5:142700919:T:C,chr5:142701037:A:G,chr5:142701963:G:T,chr5:142702379:T:C,chr5:142702610:G:A,chr5:142703638:A:G,chr5:142706021:A:G,chr5:142706108:A:C,chr5:142706432:C:T,chr5:142706649:T:C,chr5:142706721:T:G,chr5:142707072:A:G,chr5:142707129:A:G,chr5:142707451:G:A,chr5:142707534:A:G,…
W	META	6	19743898	LNC-LBCS	rs9465509	19699935	19746320	2.37e-08	8	0	0	2	2	4	chr6:19699935:T:C,chr6:19717645:T:C,chr6:19721450:T:A,chr6:19721658:A:G,chr6:19732261:T:C,chr6:19736944:A:T,chr6:19743663:C:T,chr6:19746320:T:G
W	META	6	19800741	LNC-LBCS	rs6921766	19702653	19825074	7.53e-12	103	4	2	3	10	84	chr6:19702653:C:T,chr6:19705891:C:T,chr6:19706530:G:A,chr6:19707864:A:G,chr6:19708250:A:G,chr6:19712062:G:A,chr6:19713104:C:T,chr6:19717211:G:A,chr6:19717926:C:T,chr6:19718118:C:G,chr6:19724758:C:T,chr6:19725852:A:G,chr6:19727850:C:T,chr6:19728052:T:C,chr6:19728604:G:C,chr6:19728772:T:G,chr6:19731603:A:G,chr6:19733307:T:C,chr6:19733463:A:G,chr6:19733663:T:C,chr6:19733780:T:C,chr6:19734043:A:C,chr…
W	META	6	73811471	CD109	rs3005482	73749542	73872846	1.08e-09	64	4	0	1	0	59	chr6:73749542:A:G,chr6:73756153:G:A,chr6:73760009:C:A,chr6:73761204:C:G,chr6:73762128:G:A,chr6:73765047:C:T,chr6:73767429:C:T,chr6:73767566:A:T,chr6:73771353:G:A,chr6:73807957:G:T,chr6:73808736:G:T,chr6:73810390:T:C,chr6:73810687:A:G,chr6:73811404:T:C,chr6:73811612:T:G,chr6:73812224:C:T,chr6:73812860:A:G,chr6:73813524:C:T,chr6:73813534:T:C,chr6:73814225:T:C,chr6:73814324:C:T,chr6:73814691:A:G,chr…
W	META	6	73915762	CD109/TXNP7	rs9343087	73808479	74212263	7.68e-12	226	32	0	4	10	180	chr6:73808479:C:T,chr6:73835840:A:G,chr6:73836230:G:T,chr6:73836701:G:A,chr6:73836761:T:A,chr6:73837662:C:G,chr6:73838614:T:C,chr6:73839440:T:G,chr6:73839585:C:G,chr6:73839973:A:G,chr6:73841275:A:G,chr6:73842285:A:G,chr6:73844001:T:G,chr6:73845148:C:T,chr6:73845631:C:T,chr6:73847834:C:T,chr6:73851277:G:A,chr6:73851688:C:T,chr6:73851926:A:C,chr6:73853834:C:T,chr6:73856360:T:C,chr6:73859982:A:C,chr…
W	META	6	127115168	LOC105377989	rs1936801	127059337	127211662	6.86e-12	139	3	4	16	10	106	chr6:127059337:C:T,chr6:127060915:A:G,chr6:127062715:T:A,chr6:127063389:T:C,chr6:127066222:A:G,chr6:127066942:T:C,chr6:127067041:C:T,chr6:127067307:T:G,chr6:127069540:A:G,chr6:127069574:T:A,chr6:127069704:G:C,chr6:127070325:G:A,chr6:127070699:C:G,chr6:127071276:A:G,chr6:127071319:C:T,chr6:127071832:G:A,chr6:127072062:C:T,chr6:127075070:C:T,chr6:127076095:T:C,chr6:127077450:C:A,chr6:127088737:C:T,…
W	META	6	151075273	MTHFD1L	rs9383555	151017600	151084731	4.26e-08	29	1	0	2	1	25	chr6:151017600:T:C,chr6:151049364:T:C,chr6:151068047:C:G,chr6:151068106:C:T,chr6:151070525:C:A,chr6:151071073:G:A,chr6:151071567:A:G,chr6:151071827:A:G,chr6:151071888:C:A,chr6:151071982:A:C,chr6:151072101:T:G,chr6:151072121:A:G,chr6:151072528:G:A,chr6:151073252:A:G,chr6:151074071:C:T,chr6:151074075:G:A,chr6:151074272:C:G,chr6:151074892:C:T,chr6:151076050:A:G,chr6:151077351:A:G,chr6:151077555:C:T,…
W	META	6	151320871	AKAP12	rs2347436	151320871	151320871	3.61e-08	0	0	0	0	0	0	.
W	META	6	151351050	AKAP12	rs61748676	151351050	151507514	2.95e-08	4	4	0	0	0	0	chr6:151422950:C:T,chr6:151493534:C:T,chr6:151504765:A:G,chr6:151507514:A:T
W	META	6	151405165	RMND1	rs1065310	151405165	151405165	2.84e-11	0	0	0	0	0	0	.
W	META	6	151406410	RMND1	rs9397403	151324434	151457929	2.09e-14	60	2	5	3	5	45	chr6:151324434:C:T,chr6:151326909:C:T,chr6:151329219:A:G,chr6:151337860:C:T,chr6:151338702:C:T,chr6:151339342:C:A,chr6:151339378:G:A,chr6:151347968:G:T,chr6:151365770:C:T,chr6:151377461:C:T,chr6:151377613:A:T,chr6:151379906:C:T,chr6:151384199:G:T,chr6:151385435:A:G,chr6:151385753:T:C,chr6:151386750:G:C,chr6:151387557:G:A,chr6:151391144:C:T,chr6:151391463:T:G,chr6:151392202:C:T,chr6:151392914:G:A,…
W	META	6	151417816	RMND1	rs9322319	151412916	151470602	8.37e-11	13	7	0	1	2	3	chr6:151412916:C:A,chr6:151413062:C:G,chr6:151419832:T:C,chr6:151426017:C:T,chr6:151427860:T:C,chr6:151432305:C:T,chr6:151435192:T:C,chr6:151445417:G:A,chr6:151449661:A:C,chr6:151450778:A:G,chr6:151457799:A:G,chr6:151459887:G:C,chr6:151470602:T:C
W	META	6	151424387	RMND1	rs6557139	151418178	151465386	3.52e-17	15	0	1	3	0	11	chr6:151418178:C:T,chr6:151428634:C:T,chr6:151432335:C:G,chr6:151433138:C:T,chr6:151433609:A:G,chr6:151435202:G:A,chr6:151435477:G:A,chr6:151436907:C:G,chr6:151438764:C:A,chr6:151438870:T:C,chr6:151446348:A:G,chr6:151447997:G:A,chr6:151453332:G:T,chr6:151457307:A:G,chr6:151465386:G:A
W	META	6	151481102	LOC124901434/CCDC170	rs140993356	151372381	151481102	3.04e-21	2	0	0	0	0	2	chr6:151372381:G:A,chr6:151427185:G:A
W	META	6	151494876	CCDC170	rs1971256	151339651	151550393	7.95e-31	106	10	9	9	5	73	chr6:151339651:T:C,chr6:151381307:G:C,chr6:151407579:C:T,chr6:151410882:T:C,chr6:151411250:C:T,chr6:151412448:T:C,chr6:151413064:T:A,chr6:151413428:T:C,chr6:151413760:C:T,chr6:151414643:T:C,chr6:151414949:T:G,chr6:151416996:G:A,chr6:151418052:T:C,chr6:151418109:A:G,chr6:151418460:T:A,chr6:151418507:A:G,chr6:151418675:T:G,chr6:151418825:T:C,chr6:151419717:T:A,chr6:151422494:C:A,chr6:151423148:A:G,…
W	META	6	151503727	CCDC170	rs188016086	150530320	152440863	1.37e-18	18	9	1	0	1	7	chr6:150530320:C:T,chr6:150611402:A:G,chr6:150945409:G:T,chr6:151086552:C:G,chr6:151168997:C:T,chr6:151196825:G:A,chr6:151251313:C:T,chr6:151353850:G:C,chr6:151361564:C:T,chr6:151369834:G:A,chr6:151420454:A:C,chr6:151438545:G:A,chr6:151446680:G:A,chr6:151517907:C:T,chr6:151523578:C:T,chr6:151787549:G:T,chr6:151804193:A:C,chr6:152440863:G:A
W	META	6	151511876	CCDC170	rs78588171	151379758	151523515	6.44e-20	50	0	1	0	0	49	chr6:151379758:T:C,chr6:151381102:T:C,chr6:151383413:T:C,chr6:151388843:C:T,chr6:151390891:G:A,chr6:151404268:T:C,chr6:151404531:C:T,chr6:151409097:C:G,chr6:151409768:A:G,chr6:151413863:T:C,chr6:151416042:G:T,chr6:151441034:T:C,chr6:151441170:A:C,chr6:151441475:G:C,chr6:151442265:A:G,chr6:151443104:T:C,chr6:151443404:C:T,chr6:151443530:C:T,chr6:151443820:C:A,chr6:151444376:G:T,chr6:151445064:A:G,…
W	META	6	151517721	CCDC170	rs57521493	151477426	151534353	2.43e-11	40	1	0	3	8	28	chr6:151477426:C:T,chr6:151477780:T:C,chr6:151479572:A:T,chr6:151487113:A:G,chr6:151488746:T:A,chr6:151497075:G:A,chr6:151500880:C:T,chr6:151502678:C:T,chr6:151504465:A:T,chr6:151505280:G:A,chr6:151506405:G:C,chr6:151507158:A:G,chr6:151507814:G:A,chr6:151507869:C:T,chr6:151508403:G:C,chr6:151511502:G:T,chr6:151513113:C:T,chr6:151513834:C:T,chr6:151514162:G:A,chr6:151514211:C:T,chr6:151514295:T:C,…
W	META	6	151590159	CCDC170	rs189351379	150909082	152581876	5.42e-09	6	6	0	0	0	0	chr6:150909082:T:G,chr6:151659333:A:G,chr6:151730430:C:T,chr6:151960953:G:A,chr6:152423740:G:T,chr6:152581876:C:T
W	META	6	151591492	CCDC170	rs144234957	151494378	151591492	1.38e-11	4	4	0	0	0	0	chr6:151494378:A:C,chr6:151525777:C:A,chr6:151571619:C:A,chr6:151587324:A:G
W	META	6	151684094	ESR1	rs75134544	151621492	151684094	2.48e-11	2	0	0	0	0	2	chr6:151621492:T:C,chr6:151679794:G:T
W	META	6	151688503	ESR1	rs2941740	151687645	151740444	4.49e-18	77	0	0	0	0	77	chr6:151687645:C:T,chr6:151687789:C:T,chr6:151687847:G:A,chr6:151689119:A:G,chr6:151689399:T:C,chr6:151689426:C:T,chr6:151691604:A:T,chr6:151691821:A:G,chr6:151691853:A:G,chr6:151692088:G:T,chr6:151692613:C:T,chr6:151692625:G:T,chr6:151693669:G:C,chr6:151695234:A:T,chr6:151695668:C:T,chr6:151696556:T:G,chr6:151696823:C:G,chr6:151702056:G:A,chr6:151703280:A:G,chr6:151703850:T:C,chr6:151705939:A:T,…
W	META	6	151693125	ESR1	rs113470730	151689583	151770823	4.71e-13	19	19	0	0	0	0	chr6:151689583:T:C,chr6:151692086:A:G,chr6:151693048:C:T,chr6:151693660:G:A,chr6:151694025:G:A,chr6:151707443:G:A,chr6:151710936:A:T,chr6:151711501:G:A,chr6:151714469:C:T,chr6:151719930:A:G,chr6:151722418:A:C,chr6:151726355:G:A,chr6:151729487:C:T,chr6:151731082:G:A,chr6:151732996:C:A,chr6:151734685:C:T,chr6:151760130:C:G,chr6:151763515:T:C,chr6:151770823:C:G
W	META	6	151722972	ESR1	rs11755191	151705554	151722972	9.78e-12	1	1	0	0	0	0	chr6:151705554:A:G
W	META	6	151734843	ESR1	rs6904031	151719742	151751583	1.55e-15	3	0	0	0	0	3	chr6:151719742:T:G,chr6:151749793:G:A,chr6:151751583:G:T
W	META	6	151759387	ESR1	rs147867792	151725226	151759387	3.79e-14	1	0	0	0	0	1	chr6:151725226:A:G
W	META	6	151940169	ESR1	rs150722294	151347926	152075476	1.18e-15	4	3	0	0	0	1	chr6:151347926:C:G,chr6:151728707:C:G,chr6:152030163:A:G,chr6:152075476:G:A
W	META	6	152081905	ESR1	rs192794273	151993807	152081905	9.53e-18	2	2	0	0	0	0	chr6:151993807:T:C,chr6:152006644:A:G
W	META	6	152140568	SYNE1	rs111550108	152101993	152155363	9.23e-12	25	0	0	0	2	23	chr6:152101993:T:C,chr6:152105298:G:T,chr6:152112857:G:A,chr6:152114508:G:A,chr6:152114619:C:T,chr6:152119933:G:T,chr6:152120708:C:T,chr6:152123926:G:T,chr6:152128660:G:A,chr6:152128716:C:T,chr6:152128859:G:T,chr6:152130070:G:A,chr6:152130511:C:T,chr6:152131971:G:T,chr6:152134618:T:C,chr6:152137855:G:A,chr6:152149158:T:C,chr6:152149912:T:C,chr6:152151075:T:C,chr6:152151149:G:C,chr6:152151496:A:G,…
W	META	6	152202601	SYNE1	rs77483076	152202601	152202601	6e-18	0	0	0	0	0	0	.
W	META	6	152224036	SYNE1	rs7741405	152217919	152224036	6.48e-12	2	0	0	0	1	1	chr6:152217919:C:A,chr6:152218046:T:C
W	META	6	152232583	SYNE1	rs17803970	152217850	152277329	1.86e-23	16	0	0	0	0	16	chr6:152217850:T:C,chr6:152218896:T:C,chr6:152219222:T:C,chr6:152222814:C:T,chr6:152226892:T:G,chr6:152226916:C:A,chr6:152231032:G:A,chr6:152233977:C:T,chr6:152243617:G:A,chr6:152243859:G:C,chr6:152246848:A:G,chr6:152249139:A:G,chr6:152264078:G:A,chr6:152270980:C:G,chr6:152271966:C:T,chr6:152277329:G:A
W	META	6	152239781	SYNE1	rs9479275	152223236	152239781	1.3e-14	2	1	1	0	0	0	chr6:152223236:G:A,chr6:152228501:G:T
W	META	6	152241136	SYNE1	rs58415480	152224730	152241136	7.37e-37	10	0	0	0	0	10	chr6:152224730:T:C,chr6:152228174:C:T,chr6:152232879:C:G,chr6:152233261:C:T,chr6:152233602:G:A,chr6:152235123:T:C,chr6:152235391:C:T,chr6:152235465:G:A,chr6:152237062:G:A,chr6:152237417:C:T
W	META	6	152241832	SYNE1	rs13195723	152240213	152301741	9.8e-18	7	0	0	0	0	7	chr6:152240213:A:C,chr6:152240602:A:G,chr6:152241830:G:A,chr6:152250071:T:G,chr6:152250080:A:C,chr6:152253365:C:T,chr6:152301741:A:T
W	META	6	152247587	SYNE1	rs9371246	152217282	152269482	2.31e-14	47	5	4	9	0	29	chr6:152217282:G:A,chr6:152217672:C:T,chr6:152218064:G:A,chr6:152218215:C:G,chr6:152219508:C:A,chr6:152221733:T:G,chr6:152225190:G:A,chr6:152225255:C:T,chr6:152225605:A:G,chr6:152226016:C:T,chr6:152226549:C:T,chr6:152228087:G:A,chr6:152229115:G:A,chr6:152229348:T:C,chr6:152229407:T:C,chr6:152229712:T:C,chr6:152229786:G:C,chr6:152229928:A:T,chr6:152231240:A:G,chr6:152237488:A:T,chr6:152238254:A:C,…
W	META	6	152271616	SYNE1	rs633891	152260704	152283709	1.76e-17	6	2	1	0	0	3	chr6:152260704:G:A,chr6:152263876:T:A,chr6:152271967:A:G,chr6:152282489:G:C,chr6:152283686:A:G,chr6:152283709:G:A
W	META	6	152281283	SYNE1	rs78404593	152281283	152303832	1.28e-13	3	0	0	0	0	3	chr6:152285439:G:A,chr6:152285542:G:A,chr6:152303832:A:C
W	META	6	152289837	SYNE1	rs13211170	152289837	152289837	5.08e-31	0	0	0	0	0	0	.
W	META	6	152291339	SYNE1	rs73007778	152291339	152305328	9.16e-13	6	0	0	0	1	5	chr6:152293038:C:T,chr6:152299647:T:C,chr6:152299738:A:G,chr6:152300259:C:T,chr6:152304828:G:A,chr6:152305328:C:A
W	META	6	152295038	SYNE1	rs584336	152295038	152296995	3.42e-27	1	1	0	0	0	0	chr6:152296995:C:G
W	META	6	152305554	SYNE1	rs9383984	152305554	152308482	1.4e-12	1	0	0	0	0	1	chr6:152308482:C:T
W	META	6	152306818	SYNE1	rs36019875	152304910	152310130	4.04e-25	5	2	0	0	0	3	chr6:152304910:G:A,chr6:152305522:G:A,chr6:152307964:C:T,chr6:152309045:G:A,chr6:152310130:A:G
W	META	6	152311783	SYNE1	rs1962704	152311779	152311783	1.88e-12	1	1	0	0	0	0	chr6:152311779:T:A
W	META	6	152314488	SYNE1	rs7757046	152314488	152331902	1.86e-08	23	13	0	2	0	8	chr6:152314671:T:C,chr6:152314875:T:C,chr6:152314906:G:A,chr6:152314918:T:C,chr6:152314919:G:C,chr6:152314920:A:T,chr6:152314921:T:C,chr6:152314923:A:T,chr6:152314925:G:A,chr6:152314926:A:T,chr6:152314927:G:C,chr6:152314940:T:C,chr6:152315367:A:G,chr6:152319113:G:T,chr6:152319816:A:G,chr6:152320305:G:C,chr6:152322615:C:G,chr6:152322976:C:T,chr6:152323030:C:T,chr6:152324267:C:T,chr6:152325558:T:C,…
W	META	6	152322735	SYNE1	rs7776230	152317074	152327010	3.79e-14	7	0	0	0	0	7	chr6:152317074:G:A,chr6:152317104:C:T,chr6:152319390:C:T,chr6:152320471:T:G,chr6:152322230:C:T,chr6:152322830:C:T,chr6:152327010:T:C
W	META	6	152338679	SYNE1	rs11756362	152317277	152363450	9.88e-29	19	0	0	0	0	19	chr6:152317277:G:A,chr6:152328832:G:C,chr6:152332002:C:T,chr6:152337207:T:A,chr6:152337239:A:G,chr6:152338947:G:A,chr6:152339316:G:A,chr6:152340037:T:C,chr6:152343404:C:T,chr6:152347982:G:A,chr6:152351405:T:C,chr6:152355650:G:T,chr6:152356975:G:C,chr6:152357952:G:A,chr6:152358594:G:A,chr6:152359709:T:C,chr6:152359914:A:T,chr6:152362459:G:A,chr6:152363450:T:C
W	META	6	152339702	SYNE1	rs9371587	152335743	152349854	1.03e-17	13	4	0	0	2	7	chr6:152335743:G:A,chr6:152335799:C:T,chr6:152335972:C:G,chr6:152337535:C:T,chr6:152337750:T:C,chr6:152338117:C:T,chr6:152340035:T:C,chr6:152340452:C:G,chr6:152340671:A:G,chr6:152340992:T:G,chr6:152341477:A:T,chr6:152342141:G:A,chr6:152349854:G:A
W	META	6	152363227	SYNE1	rs62426386	152338314	152377563	4.36e-09	29	1	0	4	4	20	chr6:152338314:C:T,chr6:152345749:G:T,chr6:152346034:T:C,chr6:152346501:T:C,chr6:152350340:C:A,chr6:152350418:G:A,chr6:152350840:G:A,chr6:152350896:C:T,chr6:152350938:C:T,chr6:152351205:A:G,chr6:152351480:C:G,chr6:152351908:A:G,chr6:152352384:C:A,chr6:152352740:C:T,chr6:152352997:C:T,chr6:152354719:G:A,chr6:152361656:A:G,chr6:152361973:G:A,chr6:152362048:T:G,chr6:152362064:A:G,chr6:152362278:T:G,…
W	META	6	152390610	SYNE1	rs7766519	152390610	152429882	8.39e-11	25	1	3	19	0	2	chr6:152390998:C:A,chr6:152391167:C:T,chr6:152392677:G:A,chr6:152392712:A:G,chr6:152393311:C:A,chr6:152393471:G:T,chr6:152395097:C:T,chr6:152396063:T:C,chr6:152396182:G:A,chr6:152396370:A:G,chr6:152396372:A:G,chr6:152396569:C:G,chr6:152397227:G:T,chr6:152397370:C:T,chr6:152397456:C:G,chr6:152397479:C:G,chr6:152398083:C:G,chr6:152398467:G:A,chr6:152399059:A:G,chr6:152399276:T:A,chr6:152399894:T:C,…
W	META	6	152452016	SYNE1	rs548596170	152188030	152688083	4.29e-17	4	0	0	0	0	4	chr6:152188030:T:C,chr6:152212404:T:C,chr6:152638656:C:T,chr6:152688083:C:A
W	META	6	152549567	SYNE1	rs13216059	152382266	152551443	1.23e-19	7	0	1	0	0	6	chr6:152382266:G:A,chr6:152443555:T:C,chr6:152465828:C:T,chr6:152505492:C:T,chr6:152528240:C:A,chr6:152551264:C:G,chr6:152551443:G:A
W	META	6	152550374	SYNE1	rs6916221	152451359	152551137	2.21e-12	62	34	0	0	0	28	chr6:152451359:T:C,chr6:152452059:T:A,chr6:152454328:C:T,chr6:152462919:G:A,chr6:152462940:C:T,chr6:152469398:G:A,chr6:152470339:C:A,chr6:152470816:T:C,chr6:152475105:C:A,chr6:152475930:G:A,chr6:152476218:C:T,chr6:152480350:A:G,chr6:152481074:C:T,chr6:152482384:T:C,chr6:152485428:T:C,chr6:152486688:A:G,chr6:152487056:C:T,chr6:152487293:C:T,chr6:152487607:A:C,chr6:152487826:A:G,chr6:152491007:C:G,…
W	META	6	152577842	SYNE1	rs12190943	152559237	152733172	1.77e-15	4	0	0	0	0	4	chr6:152559237:A:G,chr6:152620342:T:C,chr6:152642110:G:A,chr6:152733172:C:T
W	META	6	152748586	MYCT1/VIP	rs3757070	152748586	152772823	4.09e-08	6	0	0	0	2	4	chr6:152749068:C:G,chr6:152751561:T:C,chr6:152753941:T:C,chr6:152755821:A:T,chr6:152765101:A:T,chr6:152772823:T:A
W	META	6	152861811	LINC02840	rs117549223	152817878	153049922	1.44e-09	9	0	1	2	1	5	chr6:152817878:T:C,chr6:152889800:C:A,chr6:152904100:C:T,chr6:152907910:T:C,chr6:152912802:T:G,chr6:152939985:A:T,chr6:153030624:G:A,chr6:153048395:C:A,chr6:153049922:T:C
W	META	6	153381409	LOC105378066	rs188913933	153356054	153901396	1.75e-09	6	0	0	0	0	6	chr6:153356054:A:G,chr6:153381410:C:T,chr6:153490827:G:C,chr6:153789858:G:A,chr6:153897136:C:G,chr6:153901396:C:T
W	META	7	25829864	LINC03007/LOC100506236	rs35766302	25807698	25878532	9.03e-09	49	9	2	2	1	35	chr7:25807698:A:G,chr7:25810844:G:T,chr7:25817905:T:C,chr7:25818994:C:A,chr7:25820960:G:T,chr7:25821030:G:A,chr7:25821192:G:A,chr7:25821799:C:G,chr7:25823113:G:T,chr7:25823170:C:A,chr7:25824413:T:C,chr7:25825038:C:T,chr7:25825162:A:C,chr7:25825600:C:T,chr7:25825741:A:G,chr7:25825760:G:A,chr7:25825844:C:T,chr7:25826035:G:A,chr7:25826811:G:A,chr7:25826848:A:T,chr7:25826861:A:G,chr7:25827032:A:G,chr…
W	META	7	25862418	LOC100506236/LOC110121115	rs12700668	25814531	25865174	3.28e-10	29	0	1	0	0	28	chr7:25814531:C:T,chr7:25816496:T:C,chr7:25821518:C:T,chr7:25822019:G:A,chr7:25824011:T:A,chr7:25824097:G:A,chr7:25825922:C:T,chr7:25828072:C:G,chr7:25828680:A:T,chr7:25832313:T:C,chr7:25835531:C:T,chr7:25836210:G:A,chr7:25836992:T:C,chr7:25837185:G:T,chr7:25840391:G:A,chr7:25843219:A:G,chr7:25843587:A:G,chr7:25844482:G:T,chr7:25845791:T:C,chr7:25846858:G:T,chr7:25848395:C:T,chr7:25849533:G:A,chr…
W	META	7	46631145	HMGN1P19	rs993183	46630950	46663062	4.68e-13	43	0	0	0	0	43	chr7:46630950:A:G,chr7:46631525:G:T,chr7:46631821:A:C,chr7:46632024:G:T,chr7:46634176:C:T,chr7:46634184:G:A,chr7:46635603:G:T,chr7:46635608:G:A,chr7:46637391:A:C,chr7:46637772:A:G,chr7:46638199:A:G,chr7:46638657:G:A,chr7:46640460:C:G,chr7:46640564:A:T,chr7:46640725:C:A,chr7:46642539:G:T,chr7:46643352:G:A,chr7:46643814:A:G,chr7:46643817:C:G,chr7:46644733:C:T,chr7:46644856:C:T,chr7:46644933:G:A,chr…
W	META	8	25385697	DOCK5	rs34068702	25385697	25541586	1.33e-10	27	1	0	0	9	17	chr8:25387916:G:A,chr8:25388663:C:G,chr8:25388669:A:G,chr8:25388760:G:T,chr8:25389665:G:A,chr8:25390071:T:G,chr8:25390668:C:A,chr8:25390886:A:G,chr8:25391099:G:A,chr8:25392410:T:C,chr8:25393289:T:C,chr8:25394478:G:T,chr8:25395200:C:G,chr8:25396103:A:G,chr8:25397501:A:C,chr8:25400015:G:A,chr8:25405778:T:G,chr8:25409587:G:A,chr8:25410106:G:A,chr8:25411586:C:A,chr8:25423284:C:G,chr8:25453753:G:A,chr…
W	META	8	74340773	JPH1/GDAP1	rs10098229	74340773	74444253	6.78e-10	38	0	0	4	2	32	chr8:74342225:C:T,chr8:74347901:G:A,chr8:74350822:C:T,chr8:74351041:A:T,chr8:74353365:C:T,chr8:74353687:T:C,chr8:74355481:C:A,chr8:74356000:C:T,chr8:74357133:A:C,chr8:74361906:T:G,chr8:74362492:G:A,chr8:74362522:A:G,chr8:74363586:A:G,chr8:74366222:A:G,chr8:74366581:A:G,chr8:74371461:C:G,chr8:74372844:G:C,chr8:74376852:T:C,chr8:74376856:C:T,chr8:74377934:C:T,chr8:74377935:A:G,chr8:74378679:G:T,chr…
W	META	8	74380529	GDAP1	rs6997725	74340171	74443607	2.21e-12	103	7	0	0	0	96	chr8:74340171:C:G,chr8:74345373:A:G,chr8:74346788:G:A,chr8:74348232:A:T,chr8:74349113:C:T,chr8:74349626:A:G,chr8:74350917:C:A,chr8:74353954:A:G,chr8:74354444:A:G,chr8:74354477:A:G,chr8:74354679:T:C,chr8:74355383:A:G,chr8:74357313:A:G,chr8:74357329:T:C,chr8:74358259:A:G,chr8:74358666:C:T,chr8:74359199:G:A,chr8:74359392:C:T,chr8:74359739:A:G,chr8:74359784:A:G,chr8:74360052:T:C,chr8:74360492:C:A,chr…
W	META	8	129457565	CCDC26	rs12677333	129389629	129468311	1.84e-08	31	13	0	1	1	16	chr8:129389629:T:C,chr8:129390326:G:A,chr8:129395437:C:G,chr8:129405378:T:G,chr8:129408584:T:A,chr8:129410979:G:A,chr8:129415008:C:T,chr8:129415405:C:A,chr8:129420610:A:C,chr8:129426895:G:A,chr8:129428215:G:A,chr8:129430274:T:G,chr8:129448898:G:T,chr8:129449421:G:A,chr8:129449516:C:T,chr8:129450880:T:C,chr8:129452775:C:T,chr8:129452797:C:A,chr8:129453125:T:C,chr8:129455557:T:C,chr8:129456994:C:T,…
W	META	9	22087605	CDKN2B-AS1	rs80076828	21950677	22124369	2.54e-09	85	2	0	6	15	62	chr9:21950677:T:C,chr9:21950740:A:T,chr9:21950745:A:T,chr9:21950961:A:T,chr9:21951019:G:C,chr9:21953697:A:T,chr9:21954561:C:G,chr9:21956022:C:T,chr9:21958280:T:C,chr9:21959247:T:C,chr9:21963454:T:A,chr9:21963842:C:A,chr9:21964016:C:A,chr9:21964169:T:A,chr9:21964347:T:G,chr9:21968713:C:A,chr9:21972446:C:T,chr9:21975142:A:T,chr9:21975696:G:A,chr9:21978086:G:A,chr9:21978087:A:T,chr9:21979043:A:C,chr…
W	META	9	22124745	CDKN2B-AS1	rs4977575	21997016	22125504	1.85e-09	99	18	17	6	7	51	chr9:21997016:T:A,chr9:22003368:A:G,chr9:22009699:C:G,chr9:22011643:G:A,chr9:22015466:C:A,chr9:22015998:C:T,chr9:22019130:A:G,chr9:22019674:G:C,chr9:22021173:T:C,chr9:22026078:T:C,chr9:22026595:G:A,chr9:22026640:A:T,chr9:22027403:G:A,chr9:22028407:C:A,chr9:22029081:G:A,chr9:22029548:T:C,chr9:22031006:A:G,chr9:22032153:T:G,chr9:22033367:T:C,chr9:22036113:T:G,chr9:22036368:T:C,chr9:22040766:T:C,chr…
W	META	9	22155091	CDKN2B-AS1	rs7033903	22141035	22195773	1.16e-14	26	3	0	0	0	23	chr9:22141035:A:G,chr9:22141791:A:G,chr9:22141876:T:C,chr9:22142957:C:A,chr9:22143134:A:G,chr9:22144277:G:C,chr9:22145740:A:T,chr9:22154683:T:A,chr9:22154685:C:T,chr9:22154692:C:G,chr9:22161885:A:G,chr9:22177678:C:T,chr9:22180265:C:A,chr9:22180330:C:T,chr9:22181188:G:A,chr9:22181678:T:A,chr9:22181932:G:A,chr9:22182940:G:A,chr9:22183782:T:C,chr9:22184019:C:T,chr9:22185093:G:A,chr9:22187435:T:C,chr…
W	META	9	22158308	CDKN2B-AS1	rs117914842	22158308	22170928	4.16e-09	3	0	0	0	0	3	chr9:22168215:C:T,chr9:22170927:G:T,chr9:22170928:T:C
W	META	9	22171485	CDKN2B-AS1/DMRTA1	rs2779747	22141270	22196864	1.45e-22	59	4	0	1	5	49	chr9:22141270:C:T,chr9:22141553:T:G,chr9:22141895:T:C,chr9:22143294:T:A,chr9:22143378:T:C,chr9:22144256:T:A,chr9:22144306:C:A,chr9:22144317:T:C,chr9:22148056:C:T,chr9:22150262:T:C,chr9:22150793:C:T,chr9:22152402:C:T,chr9:22152581:G:A,chr9:22152644:G:T,chr9:22153266:T:C,chr9:22153361:G:A,chr9:22153715:T:A,chr9:22154010:C:T,chr9:22154649:C:G,chr9:22154651:T:G,chr9:22154665:C:T,chr9:22154702:C:T,chr…
W	META	9	22195357	CDKN2B-AS1/DMRTA1	rs1751446	22182185	22205247	1.08e-08	3	0	2	0	0	1	chr9:22182185:C:T,chr9:22202908:G:C,chr9:22205247:A:G
W	META	9	116571290	ASTN2	rs59299461	116440600	116718974	2.61e-08	251	5	6	1	7	232	chr9:116440600:C:A,chr9:116470196:A:G,chr9:116485780:A:G,chr9:116489507:T:C,chr9:116492079:T:C,chr9:116493018:C:T,chr9:116495249:T:G,chr9:116496304:T:C,chr9:116496541:G:A,chr9:116500083:C:T,chr9:116500561:A:T,chr9:116502148:T:C,chr9:116503647:T:C,chr9:116505913:C:A,chr9:116506682:C:G,chr9:116508975:C:T,chr9:116509186:G:A,chr9:116511822:A:T,chr9:116513582:T:C,chr9:116514276:C:T,chr9:116514899:T:C,…
W	META	9	133279294	LOC112637023/LCN1P2	rs495828	133269992	133279427	3.66e-13	8	2	0	0	0	6	chr9:133269992:C:A,chr9:133273682:T:A,chr9:133274295:A:T,chr9:133276354:T:C,chr9:133278431:C:T,chr9:133278724:T:C,chr9:133278860:C:T,chr9:133279427:C:T
W	META	10	74371486	ADK	rs11001018	74053776	74747175	5.08e-11	451	19	0	5	12	415	chr10:74053776:A:G,chr10:74069165:G:A,chr10:74091491:G:A,chr10:74094038:T:C,chr10:74096084:T:C,chr10:74100340:G:A,chr10:74101906:A:C,chr10:74103992:T:C,chr10:74104614:C:G,chr10:74105307:G:A,chr10:74107171:C:A,chr10:74107856:C:T,chr10:74107875:C:T,chr10:74108356:T:C,chr10:74109307:T:C,chr10:74110180:A:G,chr10:74111132:C:G,chr10:74111977:G:C,chr10:74113407:C:T,chr10:74113881:C:T,chr10:74114134:C:T,…
W	META	10	88344948	RNLS	rs11202727	88295142	88385193	2.42e-12	24	1	0	1	0	22	chr10:88295142:T:C,chr10:88306479:C:A,chr10:88307548:G:A,chr10:88312595:T:C,chr10:88314248:A:G,chr10:88314383:G:A,chr10:88314388:A:G,chr10:88322643:C:T,chr10:88329768:G:A,chr10:88331568:C:G,chr10:88333137:C:T,chr10:88333541:C:T,chr10:88336158:G:T,chr10:88342646:G:T,chr10:88350500:C:G,chr10:88351782:A:C,chr10:88353017:C:T,chr10:88356599:A:G,chr10:88356821:A:C,chr10:88370325:A:T,chr10:88373819:T:C,…
W	META	10	88400635	RNLS	rs792230	88294511	88522825	1.61e-15	124	0	0	0	2	122	chr10:88294511:G:A,chr10:88309190:C:T,chr10:88316086:A:G,chr10:88316958:T:C,chr10:88319957:G:T,chr10:88322989:C:A,chr10:88323430:G:A,chr10:88323588:C:T,chr10:88327082:A:G,chr10:88327627:A:G,chr10:88327651:A:G,chr10:88327655:G:C,chr10:88329669:T:C,chr10:88331783:C:T,chr10:88334704:T:G,chr10:88335167:C:T,chr10:88335582:A:T,chr10:88353411:T:G,chr10:88354522:T:G,chr10:88355926:C:A,chr10:88356025:G:A,…
W	META	10	88536710	RNLS	rs2576159	88432246	88648781	4.69e-08	44	1	1	3	11	28	chr10:88432246:T:C,chr10:88432773:A:T,chr10:88435392:T:C,chr10:88452905:C:T,chr10:88461804:A:C,chr10:88468405:G:A,chr10:88469477:C:T,chr10:88470032:T:G,chr10:88471961:T:C,chr10:88473835:A:T,chr10:88474988:G:C,chr10:88477641:G:A,chr10:88478670:G:T,chr10:88480532:C:T,chr10:88481724:G:A,chr10:88481818:T:C,chr10:88490150:A:G,chr10:88491745:C:T,chr10:88491964:T:G,chr10:88492480:G:A,chr10:88499119:C:T,…
W	META	11	30185692	ARL14EP-DT	rs7122731	30038942	30340578	9.46e-10	214	43	0	8	1	162	chr11:30038942:T:G,chr11:30045209:C:A,chr11:30046243:A:G,chr11:30049876:C:G,chr11:30050117:A:G,chr11:30058141:G:A,chr11:30068917:G:C,chr11:30070534:T:G,chr11:30083294:A:G,chr11:30083970:G:A,chr11:30096960:A:G,chr11:30103519:G:A,chr11:30114048:T:C,chr11:30124183:C:T,chr11:30124683:T:C,chr11:30124860:C:T,chr11:30125738:C:A,chr11:30125968:T:C,chr11:30126015:C:T,chr11:30127324:T:C,chr11:30128055:C:G,…
W	META	11	30204809	ARL14EP-DT	rs11031005	30104072	30374324	1.46e-34	62	0	0	0	0	62	chr11:30104072:G:C,chr11:30193714:T:A,chr11:30204981:G:A,chr11:30218631:C:A,chr11:30220740:T:C,chr11:30230805:G:T,chr11:30240421:A:G,chr11:30274508:T:C,chr11:30284128:C:T,chr11:30284892:C:T,chr11:30285103:A:T,chr11:30286442:A:G,chr11:30286612:C:T,chr11:30288280:C:T,chr11:30288322:C:T,chr11:30288358:C:T,chr11:30290640:A:G,chr11:30290692:C:T,chr11:30293311:C:A,chr11:30295275:A:G,chr11:30296186:T:G,…
W	META	11	30213235	ARL14EP-DT	rs540948	30193166	30374348	1.19e-09	214	29	0	20	0	165	chr11:30193166:A:G,chr11:30194459:C:T,chr11:30195456:T:A,chr11:30195956:T:C,chr11:30199192:T:A,chr11:30201090:C:T,chr11:30202027:A:G,chr11:30202314:A:C,chr11:30202319:A:G,chr11:30203623:C:G,chr11:30204739:C:T,chr11:30205987:T:C,chr11:30206376:T:A,chr11:30206717:T:C,chr11:30207687:A:C,chr11:30208669:A:G,chr11:30210834:T:C,chr11:30211068:A:G,chr11:30212847:T:C,chr11:30212885:A:G,chr11:30213059:T:C,…
W	META	11	30332334	ARL14EP	rs77055031	30168949	30445814	2.81e-14	3	0	0	0	0	3	chr11:30168949:C:T,chr11:30182793:C:T,chr11:30445814:C:T
W	META	12	94954450	LOC105369915/NDUFA12	rs835056	94943252	94967275	1.19e-09	22	3	0	0	1	18	chr12:94943252:T:C,chr12:94943955:A:G,chr12:94944231:C:G,chr12:94944233:G:A,chr12:94944587:A:G,chr12:94946208:C:G,chr12:94946507:C:T,chr12:94946573:T:C,chr12:94946784:G:C,chr12:94948157:A:G,chr12:94948833:T:C,chr12:94949848:G:A,chr12:94953866:C:T,chr12:94954402:G:A,chr12:94954455:G:A,chr12:94954938:C:T,chr12:94955273:T:C,chr12:94955922:C:T,chr12:94960462:G:A,chr12:94961205:G:A,chr12:94967223:T:A,…
W	META	12	95117545	FGD6	rs12578168	95003256	95198101	6.18e-09	58	3	2	4	3	46	chr12:95003256:C:T,chr12:95003868:G:T,chr12:95005679:C:T,chr12:95024361:T:A,chr12:95026223:G:T,chr12:95028619:T:G,chr12:95035262:G:A,chr12:95036891:A:G,chr12:95039265:A:C,chr12:95046249:A:G,chr12:95048623:T:C,chr12:95052475:G:C,chr12:95058773:C:T,chr12:95061385:G:C,chr12:95068917:C:T,chr12:95070927:C:T,chr12:95083875:A:G,chr12:95086617:G:C,chr12:95086934:G:A,chr12:95090416:G:T,chr12:95092297:A:G,…
W	META	12	95128701	FGD6	rs7134554	94967205	95319980	2.65e-09	66	17	1	16	2	30	chr12:94967205:C:T,chr12:94967688:A:T,chr12:94967834:C:T,chr12:94967920:C:A,chr12:94968791:T:C,chr12:94969242:G:C,chr12:94969267:T:C,chr12:94972023:T:C,chr12:94972060:C:T,chr12:94974463:C:A,chr12:94976250:C:T,chr12:94976739:G:A,chr12:94981997:A:G,chr12:94986564:T:C,chr12:94990626:T:C,chr12:94997034:G:T,chr12:95001799:G:A,chr12:95021426:A:C,chr12:95032218:T:A,chr12:95035656:G:A,chr12:95043187:G:A,…
W	META	12	95164703	FGD6	rs11615095	95011357	95300167	1.58e-08	32	5	4	1	1	21	chr12:95011357:T:C,chr12:95040676:C:T,chr12:95063758:A:G,chr12:95087725:C:T,chr12:95141728:T:C,chr12:95148867:T:C,chr12:95148897:T:C,chr12:95148927:T:C,chr12:95148957:T:C,chr12:95164366:T:C,chr12:95166514:G:A,chr12:95175619:C:T,chr12:95177017:G:A,chr12:95178042:A:C,chr12:95186305:G:C,chr12:95186519:A:G,chr12:95189432:G:C,chr12:95198596:C:T,chr12:95212777:C:G,chr12:95215916:C:T,chr12:95227945:G:A,…
[truncated: 33 more rows]

## Sheet: S4_all_GWAS_loci
Phenotype	Ancestry	#CHROM	POS	Lead_SNP_Nearest_Gene	Lead_SNP_RSID	MIN_POS	MAX_POS	P	TOTAL	NONSIG	S0.05	S0.01	S0.001	S0.0001	SP2
[truncated: 104 more rows]

[truncated: 20 more sheets: S5_locus_labels_for_plots, S6_LDSC_heritability, S7_partitioned_h2_results, S8_popcorn_rgi_estimates, S9_mesusie_pip_results, S10_significant_MAGMA_genes, S11_LDSC_genetic_corr, S12_complex_trait_MR_tests, S13_scDRS_regressions, S14_gene_exp_per_context, S15_significant_predixcan_hits, S16_significant_SMR_results, S17_gene_set_chisq_tests, S18_biobank_genetic_data_info, S19_biobank_ancestry_assignment, S20_biobank_gwas_methods_info, S21_MAGMA_test_counts, S22_Predixcan_test_counts, S23_SMR_test_counts, S24_gene_set_chisq_test_counts]
